# Supplementary material for: Super interactive promoters provide insight into cell type-specific regulatory networks in blood lineage cell types
Source: PubMed Central journal article supplement (PMC8830683; doi:10.1371/journal.pgen.1009984), 2022-01-31
Supplement: pgen.1009984.s003.pdf [file pgen.1009984.s003.pdf]

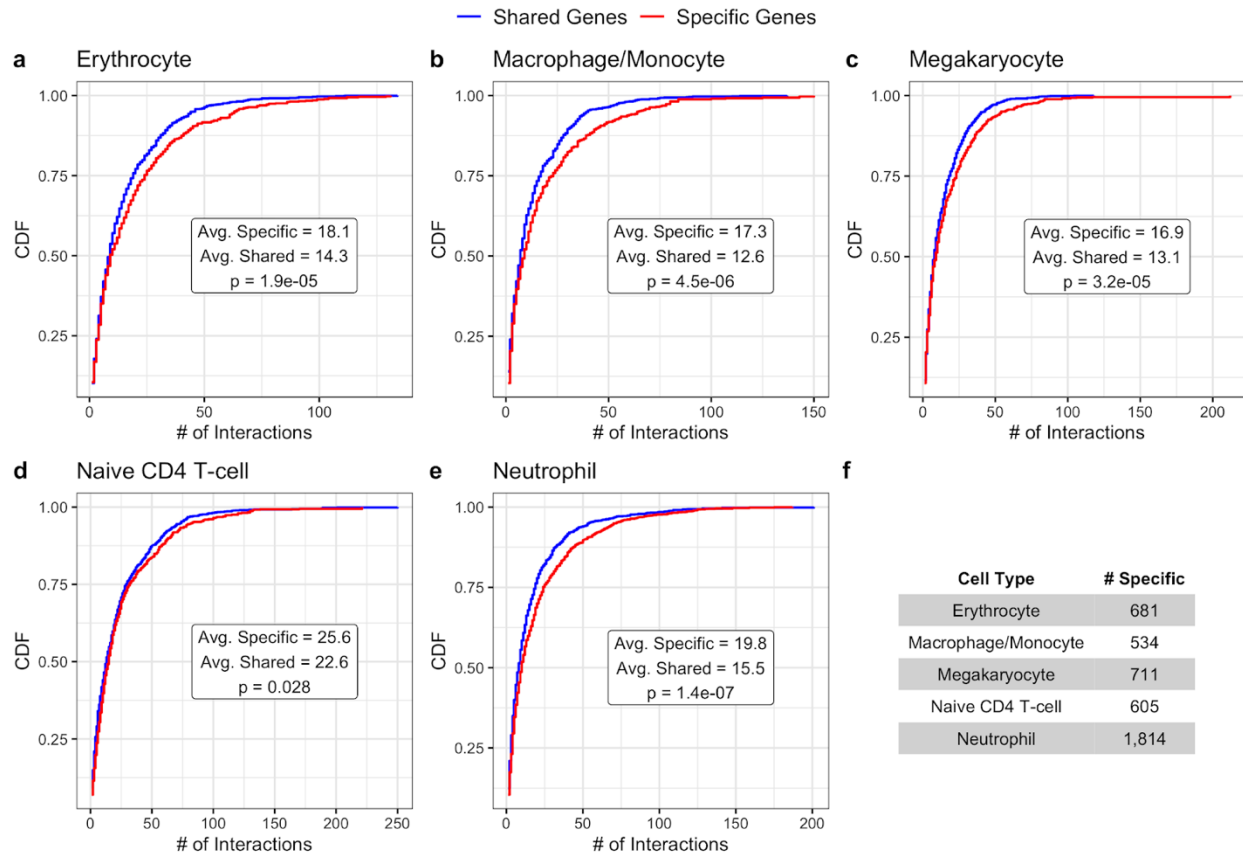

**S1 Fig. Cell type-specifically expressed genes exhibit higher levels of chromatin interactivity in the corresponding cell type.** Each panel displays the empirical cumulative distribution function (CDF) of the number of significant pcHi-C interactions for shared versus cell type-specific genes in (A) erythrocytes, (B) macrophages/monocytes, (C) megakaryocytes, (D) naive CD4 T-cells, and (E) neutrophils. The average number of interactions for specific and shared genes within each cell type is reported along with the corresponding two-sided *t*-test *p*-value. (F) The number of specific genes per cell type.
