# Supplementary material for: Super interactive promoters provide insight into cell type-specific regulatory networks in blood lineage cell types
Source: PubMed Central journal article supplement (PMC8830683; doi:10.1371/journal.pgen.1009984), 2022-01-31
Supplement: pgen.1009984.s008.pdf [file pgen.1009984.s008.pdf]

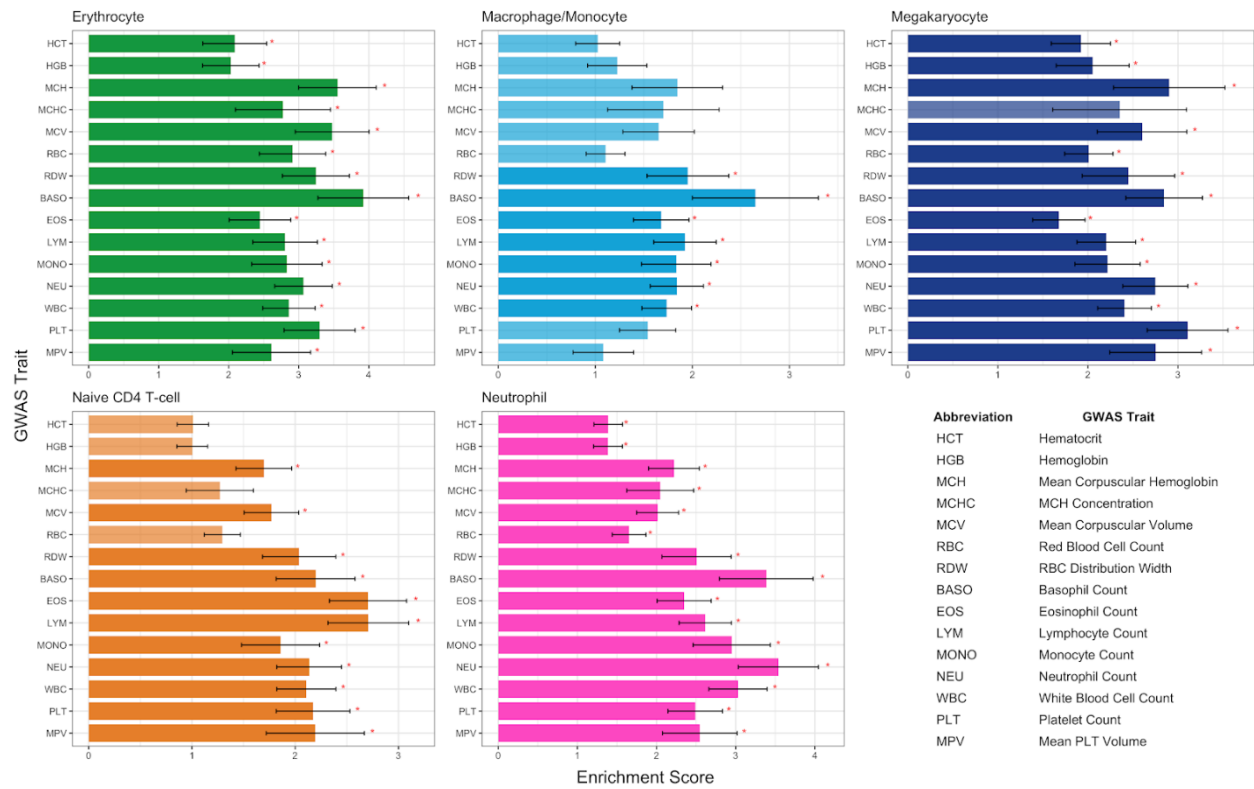

**S6 Fig. Partitioned SNP heritability—for blood cell traits - all SIP PIRs.** Enrichment scores for SIPs and 15 blood cell traits. (\* denotes statistically significant enrichment score ( $p < 0.05$ ); Ery = erythrocytes; MacMon = macrophages/monocytes; MK = megakaryocytes; nCD4 = naive CD4 T-cells; Neu = neutrophils)
