# Supplementary material for: Super interactive promoters provide insight into cell type-specific regulatory networks in blood lineage cell types
Source: PubMed Central journal article supplement (PMC8830683; doi:10.1371/journal.pgen.1009984), 2022-01-31
Supplement: pgen.1009984.s009.pdf [file pgen.1009984.s009.pdf]

• Blood Cell    • Other Tissue    • Whole Blood

**a** Top 10% of Blood Cells

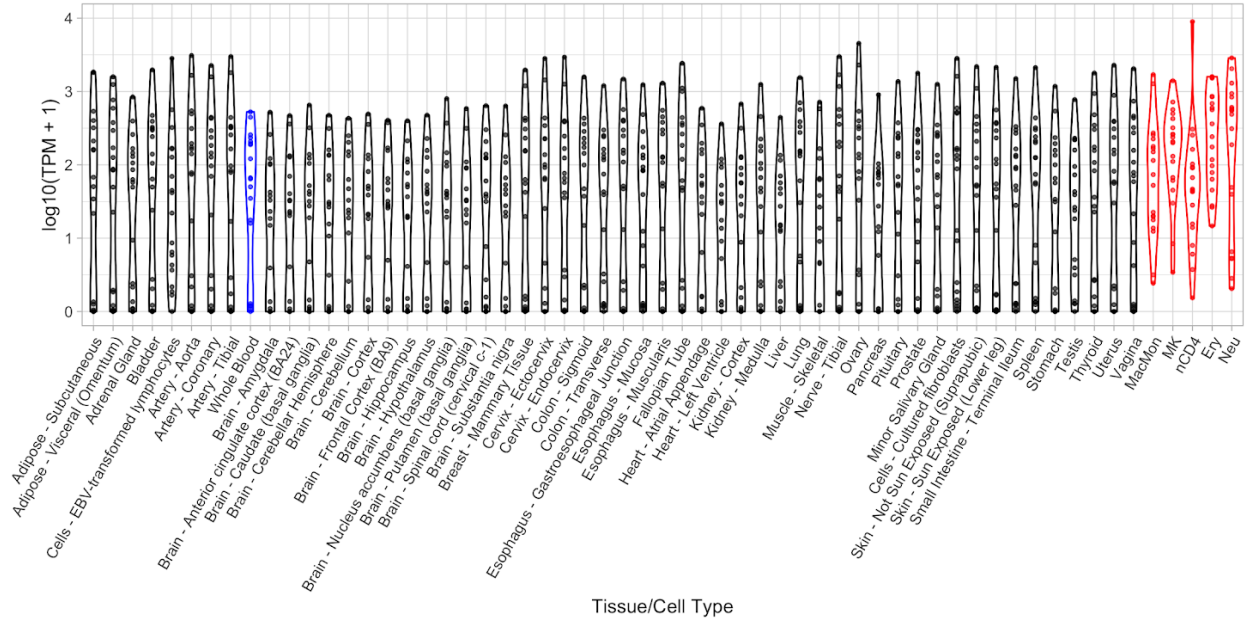

**b** Top 20% of Blood Cells

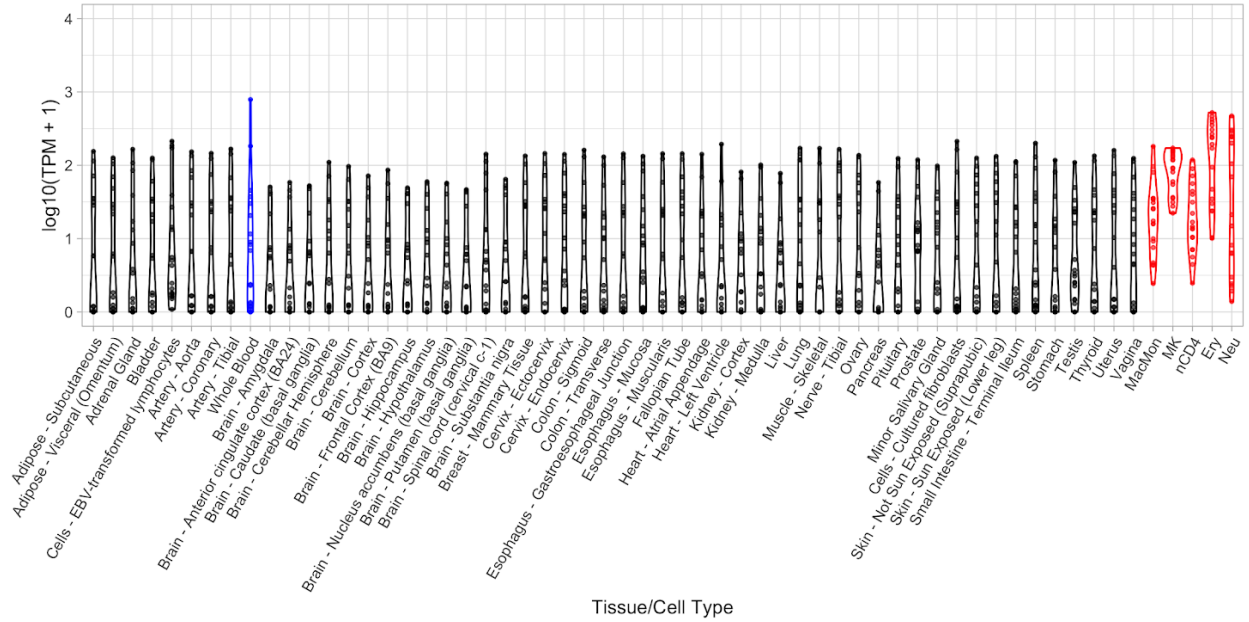

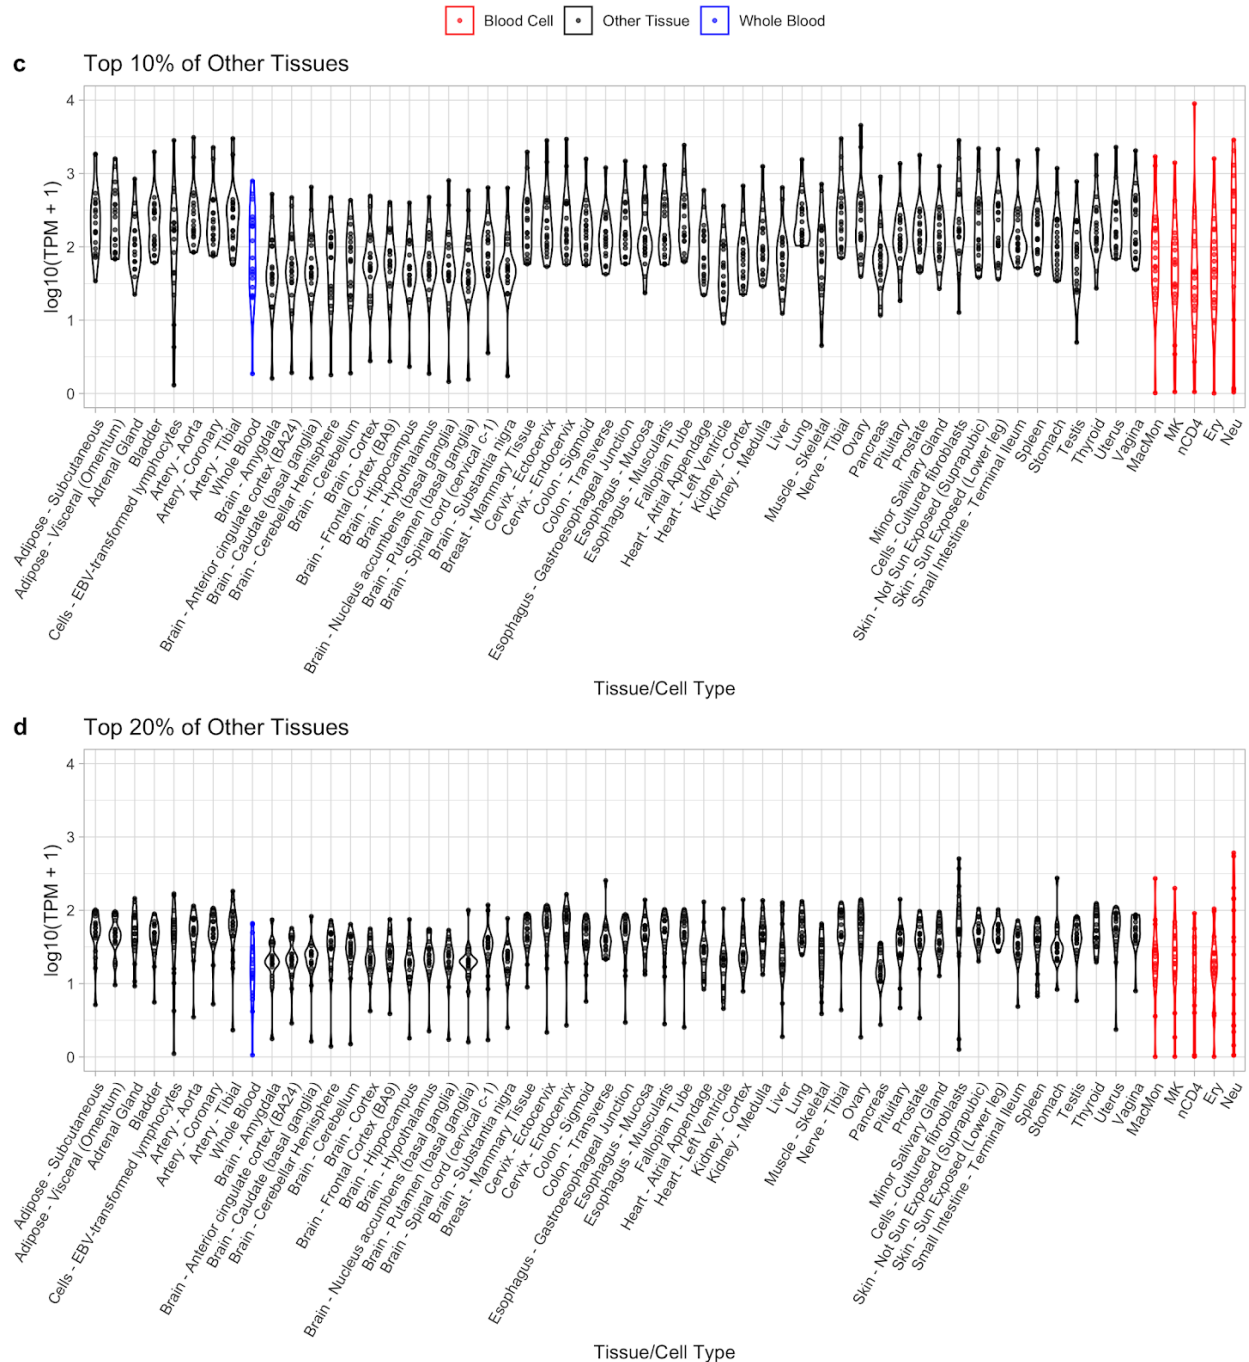

**S7 Fig. Shared SIP genes have elevated expression levels in hematopoietic cell types.** Violin plots showing the distribution of gene expression of shared SIP genes in various tissues as well as the five blood cell types. **(A)** Shared SIP genes with the top 10% of expression among blood cells. **(B)** Shared SIP genes with the top 10-20% of expression among blood cells. **(C)** Shared SIP genes with the top 10% of expression among other tissues (non-blood cells). **(D)** Shared SIP genes with the top 10-20% of

expression among other tissues (non-blood cells). (Ery = erythrocytes; MacMon =  
macrophages/monocytes; MK = megakaryocytes; nCD4 = naive CD4 T-cells; Neu = neutrophils)
