# Supplementary material for: Super interactive promoters provide insight into cell type-specific regulatory networks in blood lineage cell types
Source: PubMed Central journal article supplement (PMC8830683; doi:10.1371/journal.pgen.1009984), 2022-01-31
Supplement: pgen.1009984.s010.pdf [file pgen.1009984.s010.pdf]

• Blood Cell    • Other Tissue    • Whole Blood

**a** Top 10% of Neutrophils

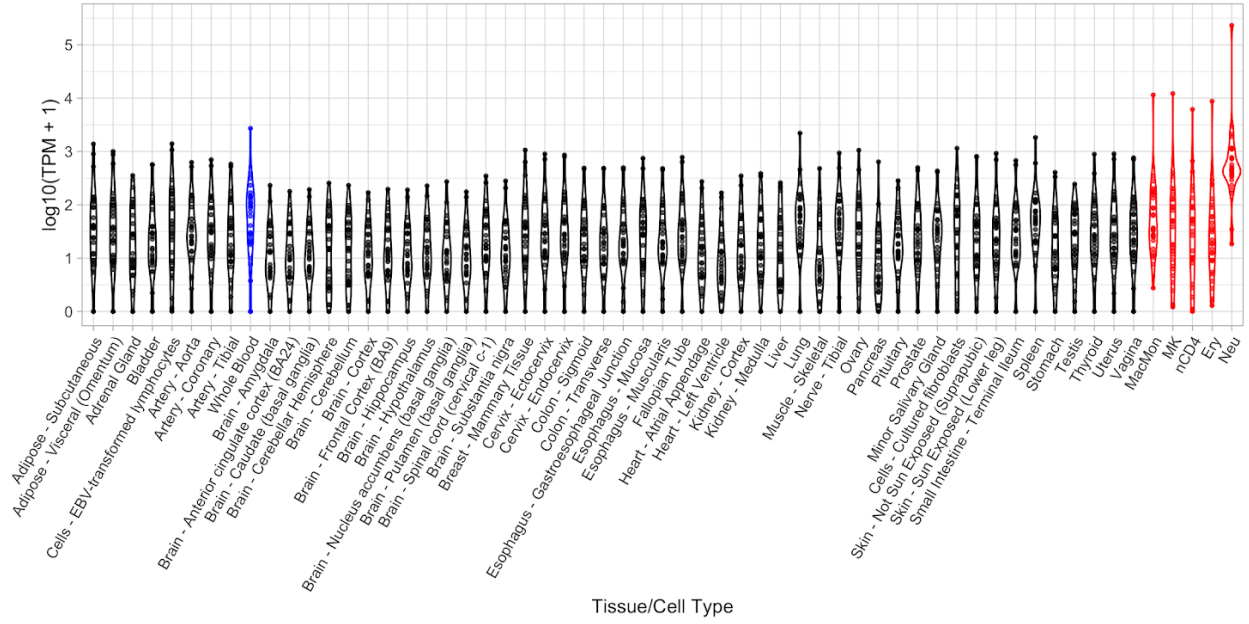

**b** Top 20% of Neutrophils

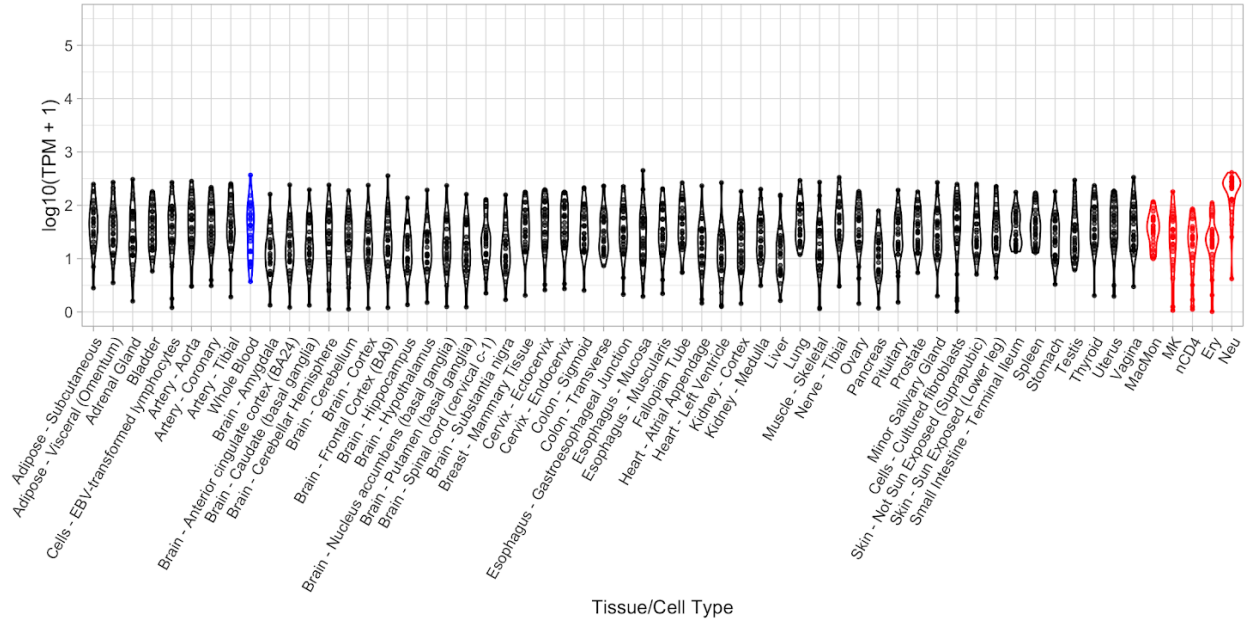

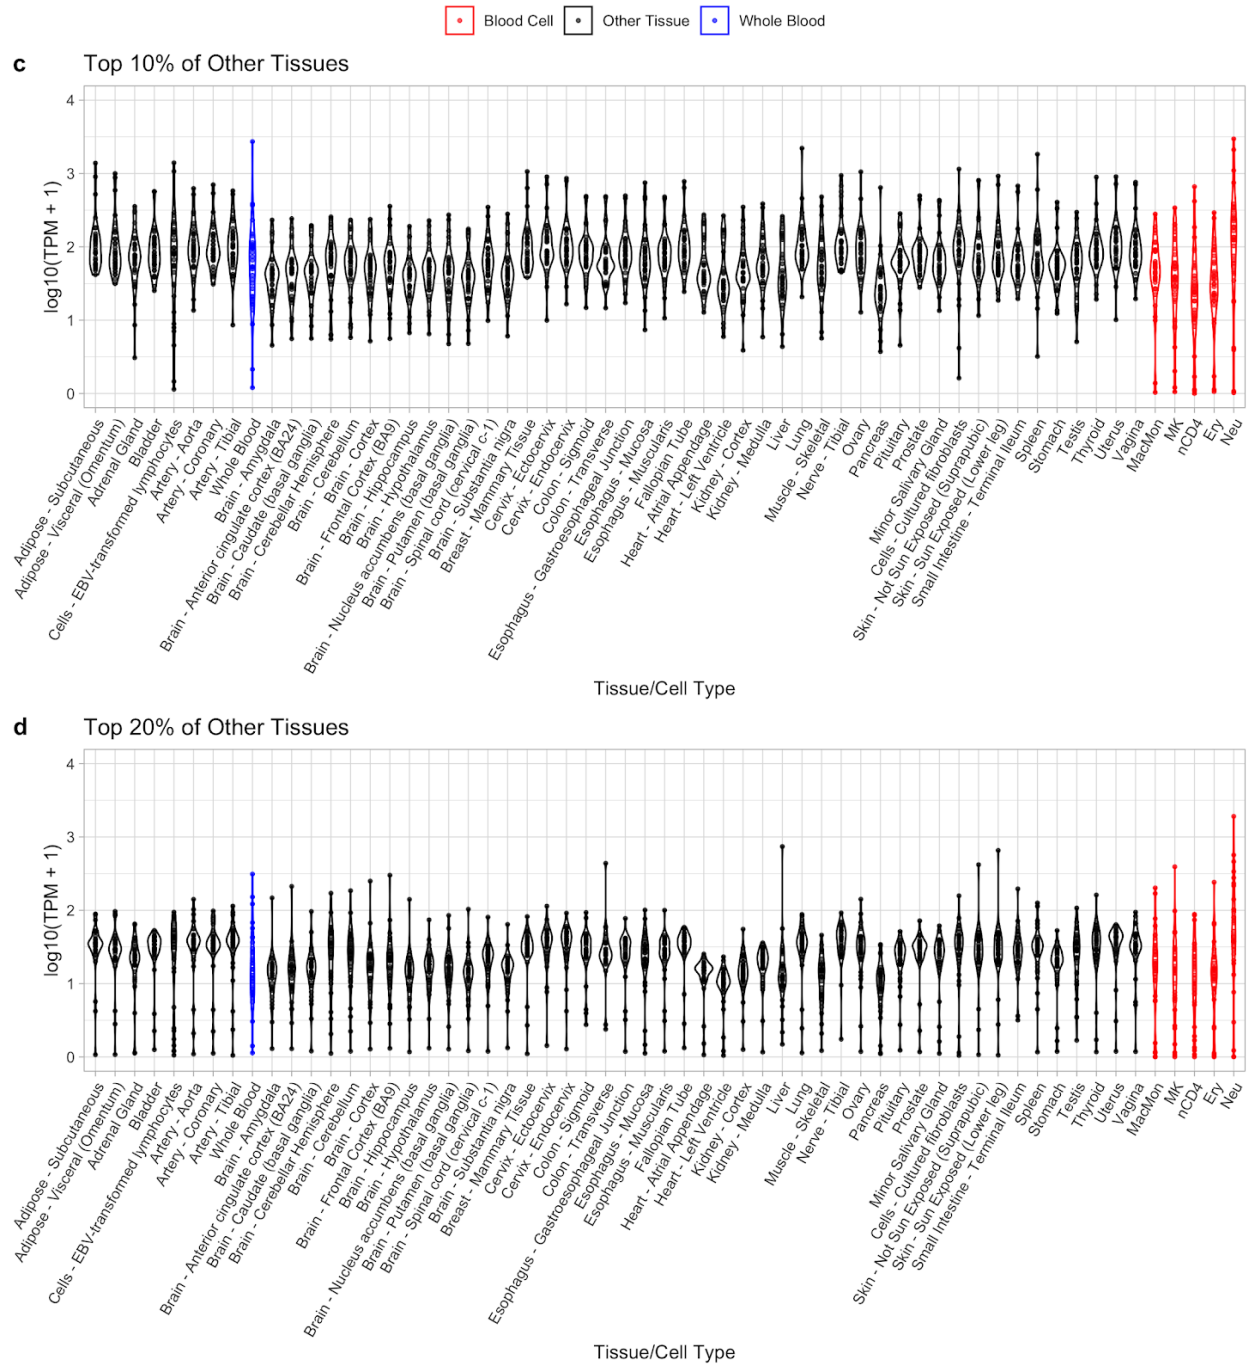

**S8 Fig. Neutrophil specific SIP genes have elevated expression levels in neutrophils.** Violin plots showing the distribution of gene expression of neutrophil-specific SIP genes in various tissues as well as the five blood cell types. The cell type-specific SIP genes for erythrocytes, macrophages/monocytes, and naive CD4 T-cells show similar trends. **(A)** Neutrophil-specific SIP genes with the top 10% of neutrophils

expression. **(B)** Neutrophil-specific SIP genes with the top 10-20% of neutrophils expression. **(C)**

Neutrophil-specific SIP genes with the top 10% of expression among other tissues (non-blood cells). **(D)**

Neutrophil-specific SIP genes with the top 10-20% of expression among other tissues (non-blood cells).

(Ery = erythrocytes; MacMon = macrophages/monocytes; MK = megakaryocytes; nCD4 = naive CD4 T-cells; Neu = neutrophils)
