# Supplementary material for: Super interactive promoters provide insight into cell type-specific regulatory networks in blood lineage cell types
Source: PubMed Central journal article supplement (PMC8830683; doi:10.1371/journal.pgen.1009984), 2022-01-31
Supplement: pgen.1009984.s011.pdf [file pgen.1009984.s011.pdf]

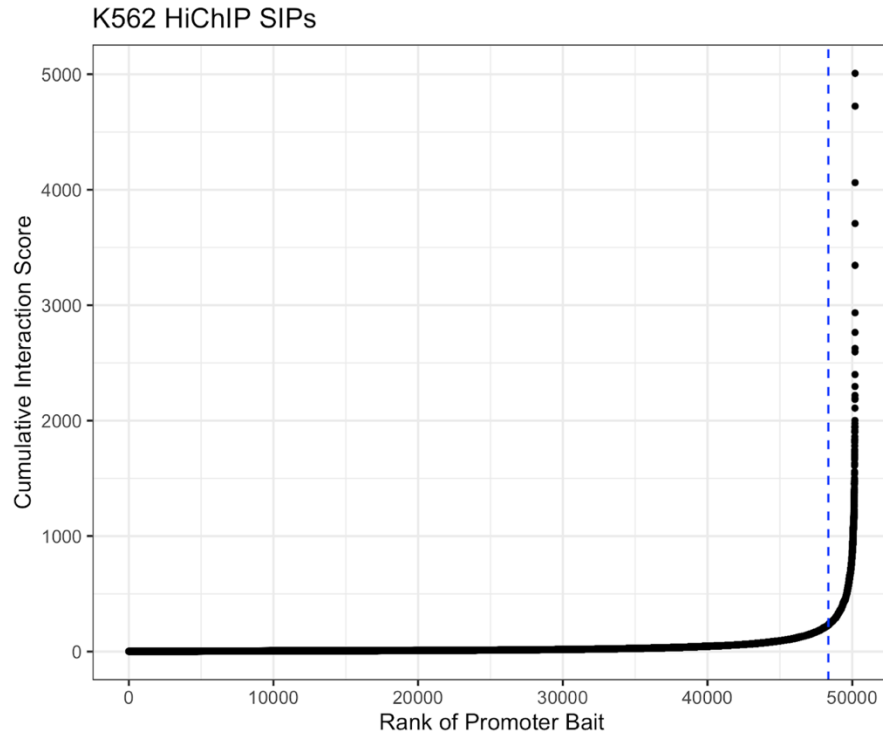

**S9 Fig. Hockey plots for each cell type show the ranked cumulative interaction MAP scores for K562 SIPs (baits)**
