# Supplementary material for: Super interactive promoters provide insight into cell type-specific regulatory networks in blood lineage cell types
Source: PubMed Central journal article supplement (PMC8830683; doi:10.1371/journal.pgen.1009984), 2022-01-31
Supplement: pgen.1009984.s013.pdf [file pgen.1009984.s013.pdf]

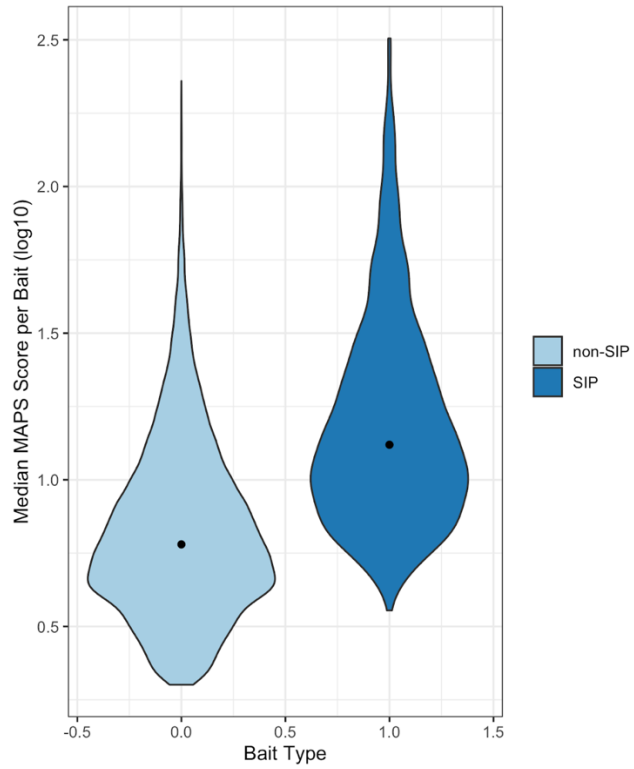

**S11 Fig. The Distribution of the median MAP score (log<sub>10</sub> scale) of significant interactions per promoter bait for SIPs and non-SIPs in K562. The median of each distribution is marked by a black dot.**
