# Supplementary material for: Super interactive promoters provide insight into cell type-specific regulatory networks in blood lineage cell types
Source: PubMed Central journal article supplement (PMC8830683; doi:10.1371/journal.pgen.1009984), 2022-01-31
Supplement: pgen.1009984.s014.pdf [file pgen.1009984.s014.pdf]

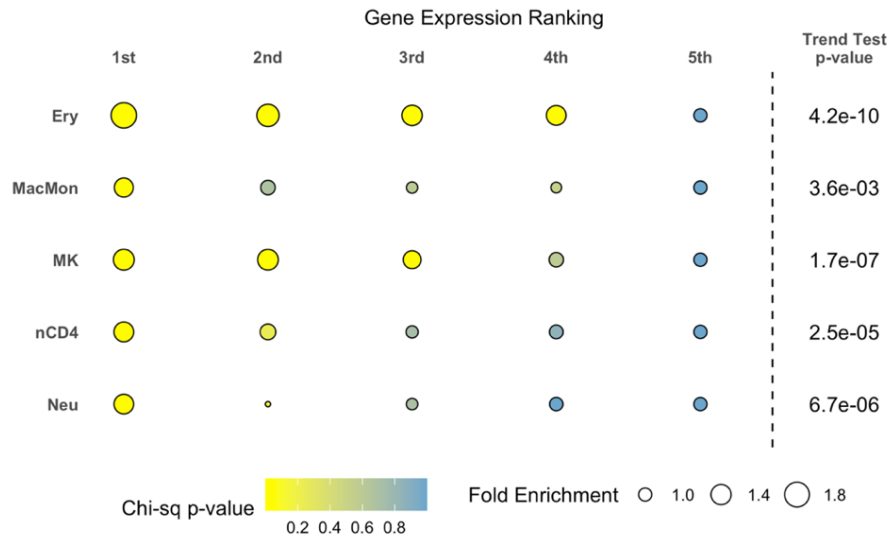

**a.**

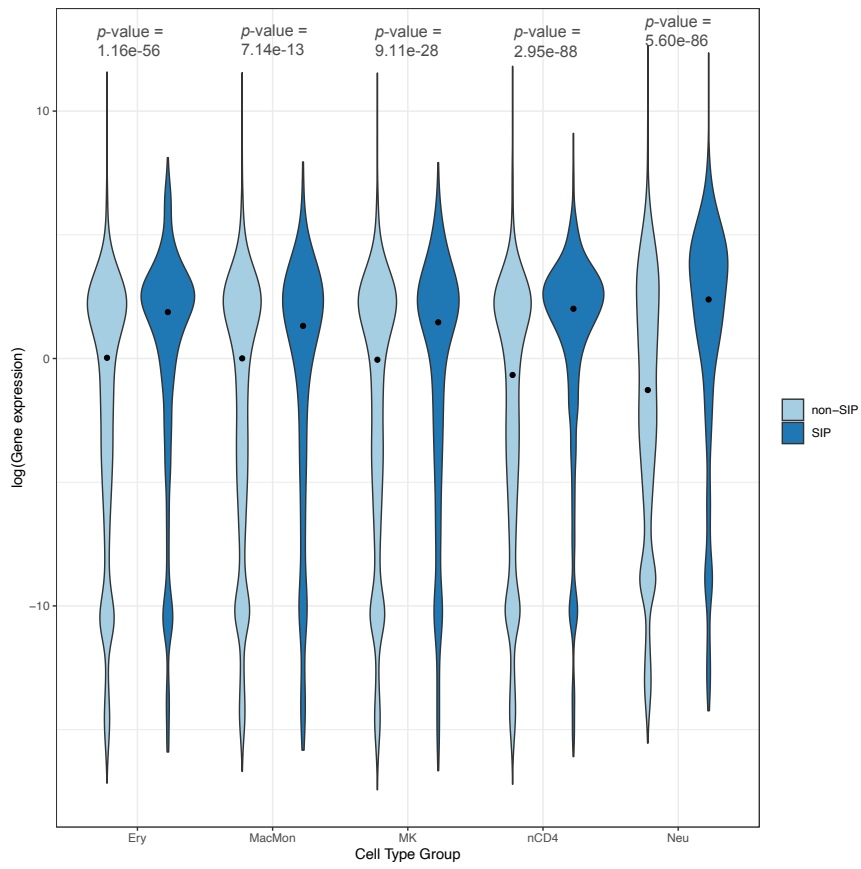

**b.**

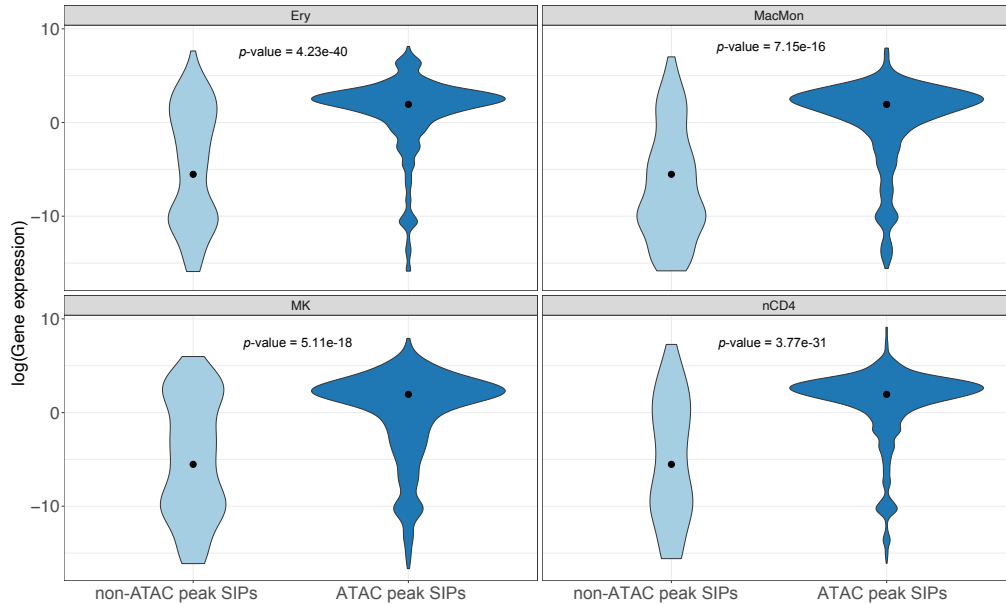

c.

**S12 Fig. (A) Highly expressed genes exhibit higher level of chromatin interactions in a cell type specific manner.** In each cell type, genes with the highest (1st) rank in expression show significantly higher chromatin interaction (as measured by SIP score) than those with the lowest (5th) ranked. The size of the circle denotes the fold-change (in SIP scores, quantifying the level of chromatin interaction) and the color denotes the Chi-square significance of enrichment (again for SIP scores). The Cochran-Armitage trend test  $p$ -value (one-sided) is also reported. **(B) SIP genes detected in a cell type are more likely to be highly expressed in that cell type** (Wilcoxon test  $p$ -value =  $2.95 \times 10^{-88} \sim 7.14 \times 10^{-13}$ ). **(C) SIPs overlapping ATAC-seq peaks are more likely to be highly expressed than those not overlapping.** (Wilcoxon test  $p$ -value =  $4.23 \times 10^{-40} \sim 7.15 \times 10^{-16}$ ) (Ery = erythrocytes; MacMon = macrophages/monocytes; MK = megakaryocytes; nCD4 = naive CD4 T-cells; Neu = neutrophils)
