# Supplementary material for: Super interactive promoters provide insight into cell type-specific regulatory networks in blood lineage cell types
Source: PubMed Central journal article supplement (PMC8830683; doi:10.1371/journal.pgen.1009984), 2022-01-31
Supplement: pgen.1009984.s016.pdf [file pgen.1009984.s016.pdf]

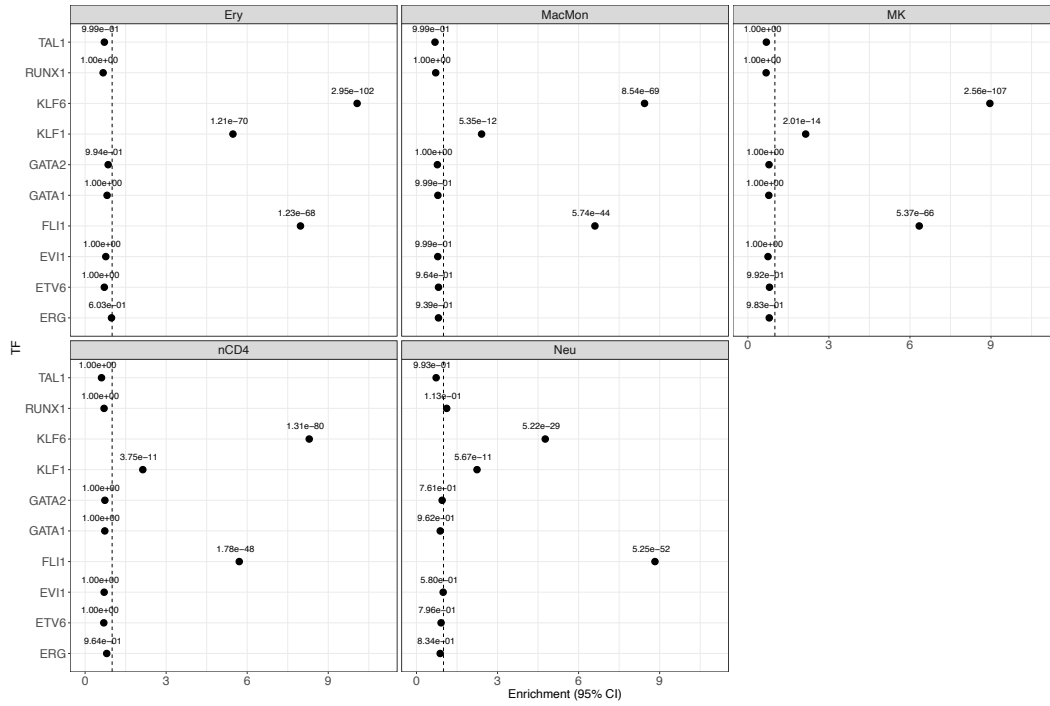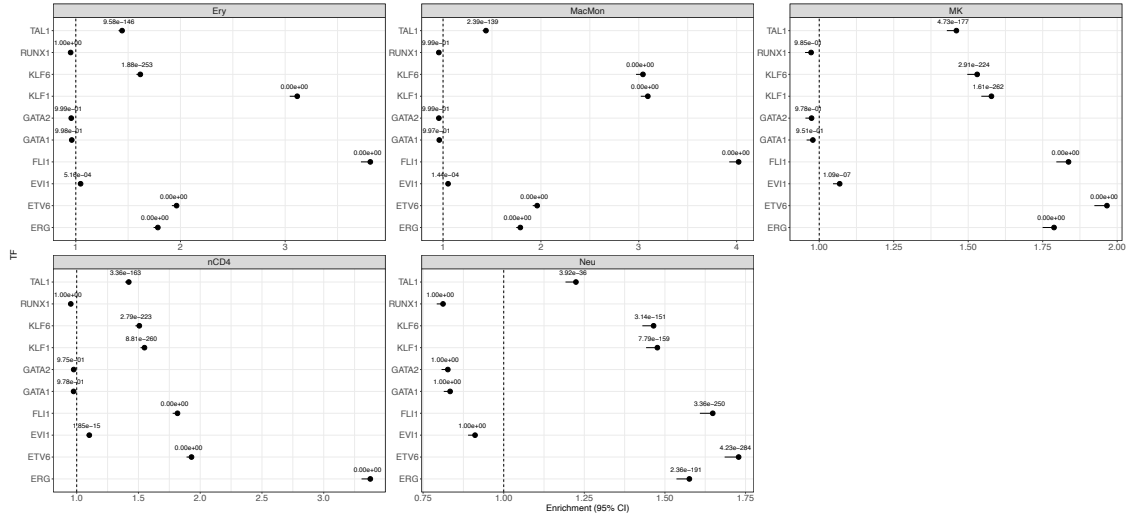

**S14 Fig. Transcription factor motif enrichment analysis for (A) SIPs versus non-SIPs. (B) SIP PIRs versus non-SIP PIRs. The Y-axis shows the transcription factor and X-axis shows odds ratio of enrichment. The dot denotes the point estimate of odds ratio and the line denotes the lower 95% confidence.**
