# Supplementary material for: Super interactive promoters provide insight into cell type-specific regulatory networks in blood lineage cell types
Source: PubMed Central journal article supplement (PMC8830683; doi:10.1371/journal.pgen.1009984), 2022-01-31
Supplement: pgen.1009984.s017.pdf [file pgen.1009984.s017.pdf]

### Ery SIPs vs non-SIPs

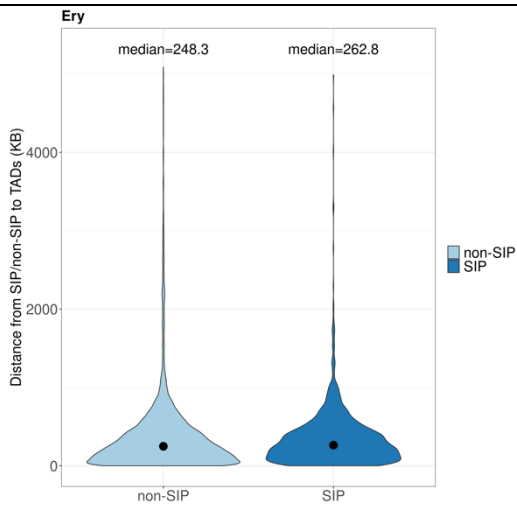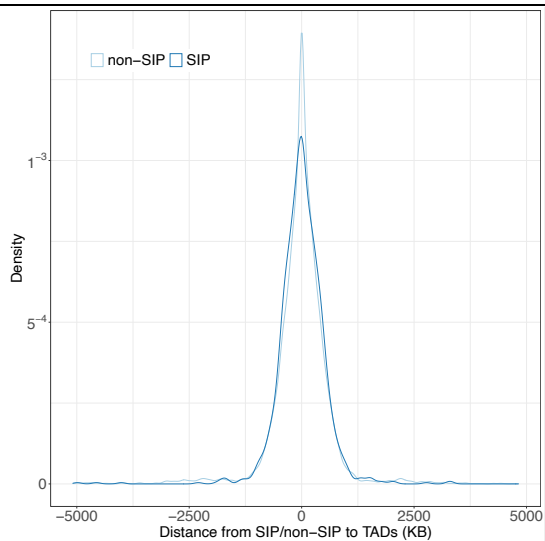

### MacMon SIPs vs non-SIPs

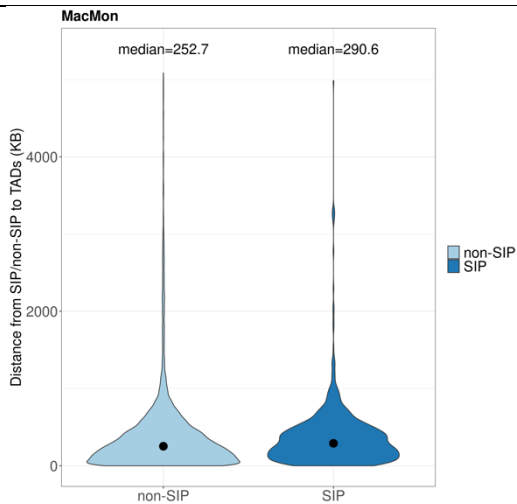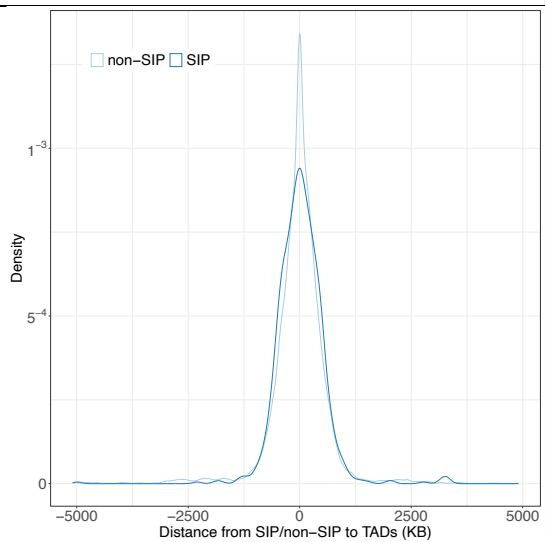

### MK SIPs vs non-SIPs

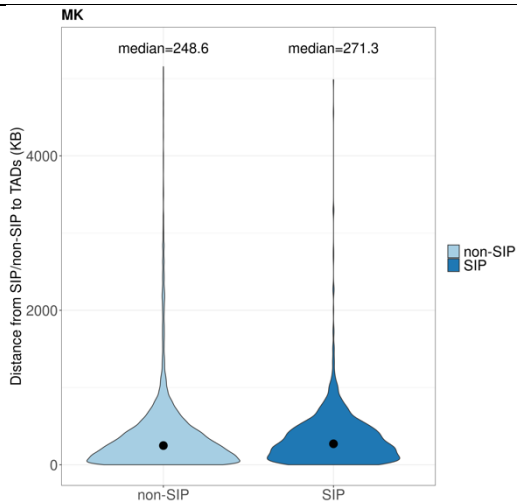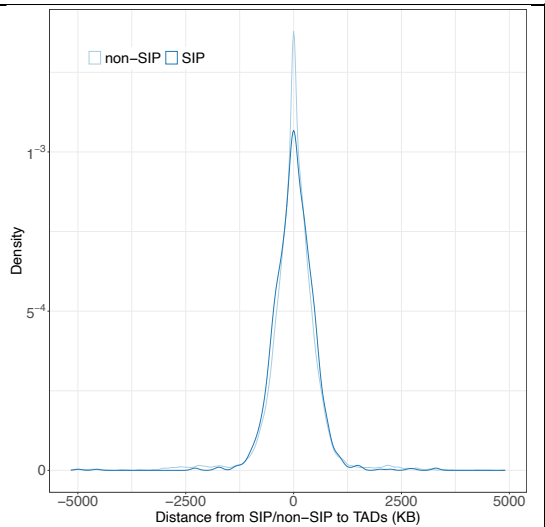

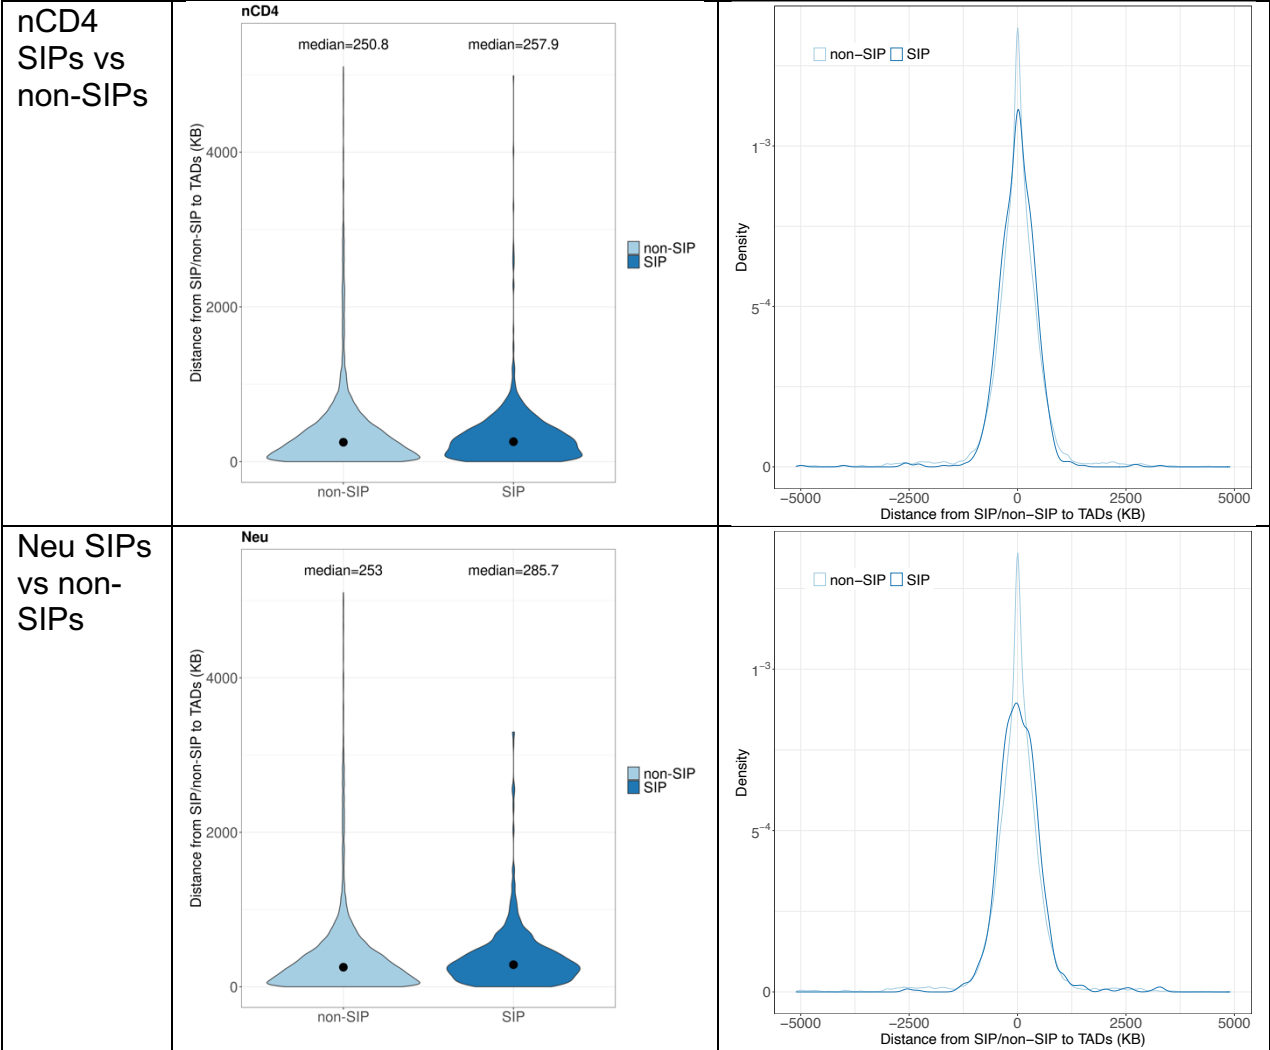

**S15 Fig. Distance to TAD boundary for SIPs versus non-SIPs.** Distributions of distance to TAD boundaries for non-SIPs versus SIPs are visualized using side-by-side violin plots (left) and overlapping density plots (right).
