# Supplementary material for: Super interactive promoters provide insight into cell type-specific regulatory networks in blood lineage cell types
Source: PubMed Central journal article supplement (PMC8830683; doi:10.1371/journal.pgen.1009984), 2022-01-31
Supplement: pgen.1009984.s019.pdf [file pgen.1009984.s019.pdf]

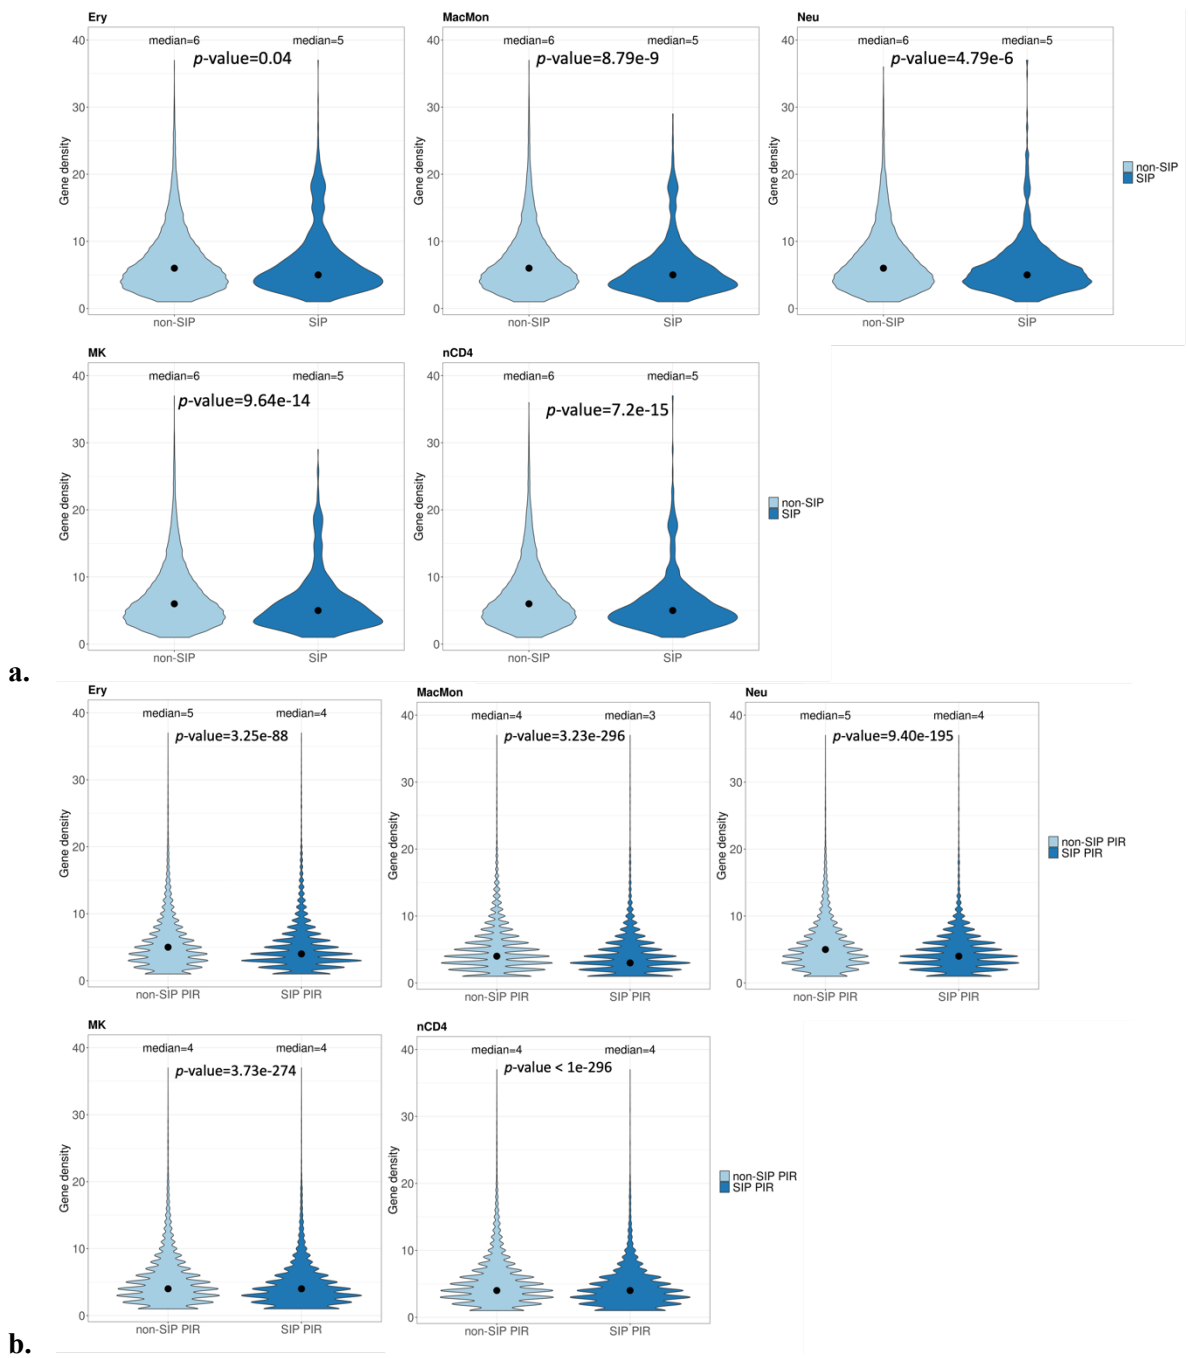

**S17 Fig. Gene density for SIPs versus non-SIPs and SIP PIRs versus non-SIP PIRs. A. SIPs versus non-SIPs; B. SIP PIRs versus non-SIP PIRs. The median of each distribution is marked by a black dot.**
