# Supplementary material for: Super interactive promoters provide insight into cell type-specific regulatory networks in blood lineage cell types
Source: PubMed Central journal article supplement (PMC8830683; doi:10.1371/journal.pgen.1009984), 2022-01-31
Supplement: pgen.1009984.s020.pdf [file pgen.1009984.s020.pdf]

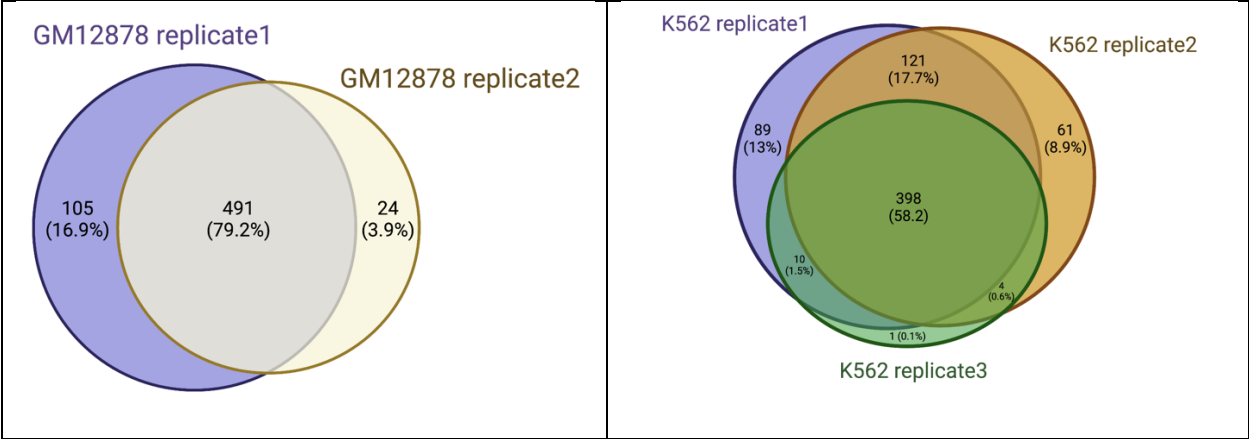

**S18 Fig. Venn diagrams show SIPs detected across biological replicates. (A)** Two replicates of GM12878 HiChIP data; and **(B)** Three replicates of K562 HiChIP data.
