# Supplementary material for: Super interactive promoters provide insight into cell type-specific regulatory networks in blood lineage cell types
Source: PubMed Central journal article supplement (PMC8830683; doi:10.1371/journal.pgen.1009984), 2022-01-31
Supplement: pgen.1009984.s021.pdf [file pgen.1009984.s021.pdf]

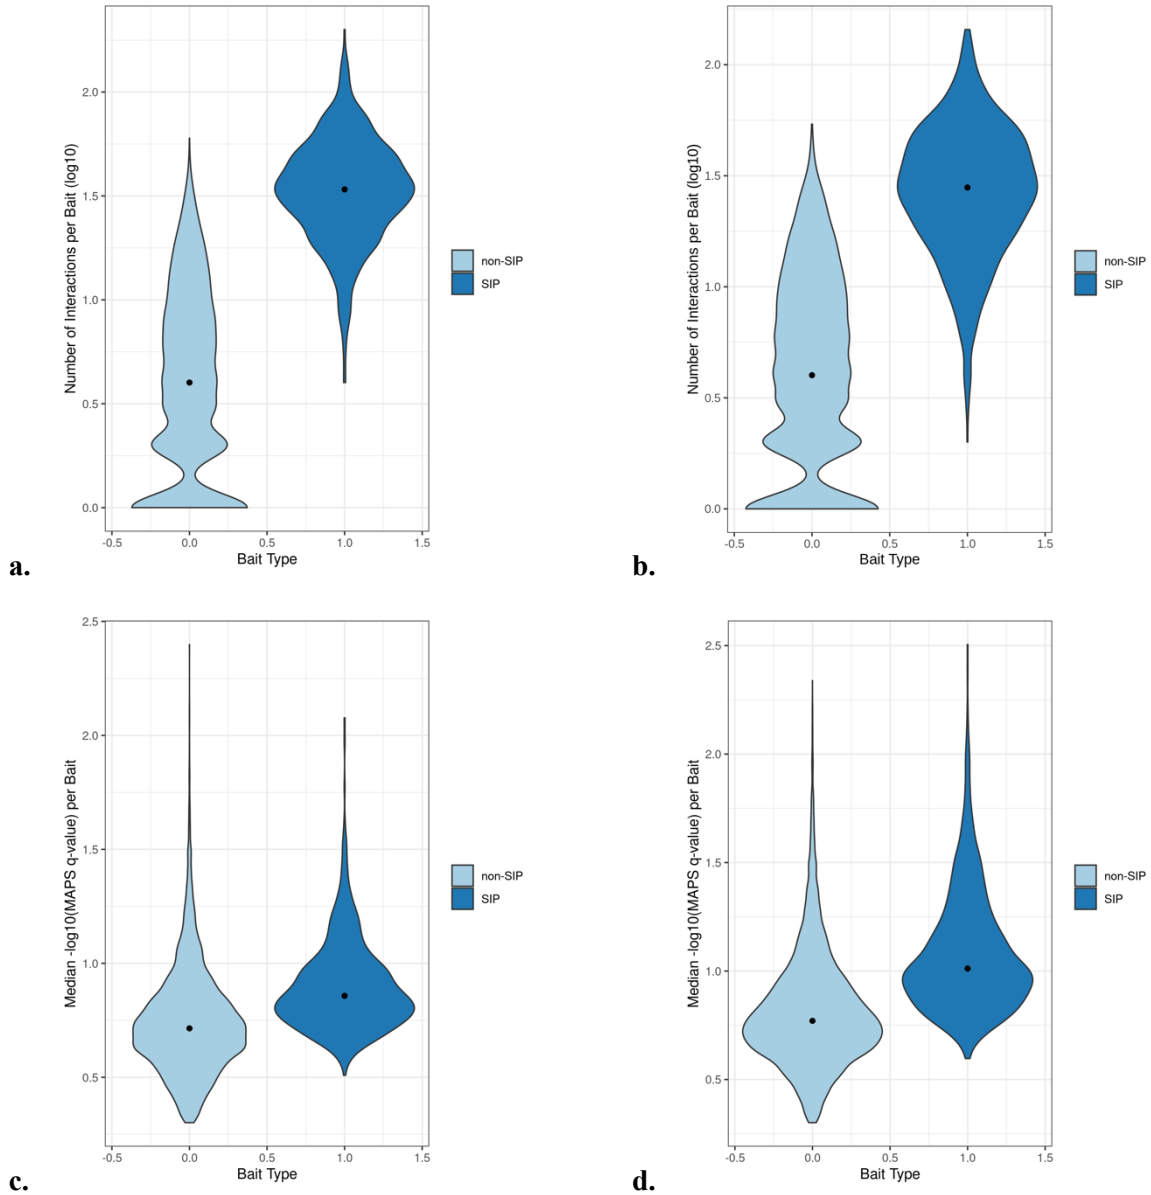

**S19 Fig. SIP patterns at different resolution (GM12878 HiChIP data)** (A) The distribution of the number of significant interactions (log10 scale) for SIPs and non-SIPs, at 5kb resolution; (B) The distribution of the number of significant interactions (log10 scale) for SIPs and non-SIPs, at 10kb resolution; (C) The distribution of the median SIP score ( $-\log_{10}$  MAPS q-value) of significant interactions for SIPs and non-SIPs, at 5kb resolution; (D) The distribution of the median SIP score ( $-\log_{10}$  MAPS q-value) of significant interactions for SIPs and non-SIPs, at 10kb resolution.
