# Supplementary material for: Super interactive promoters provide insight into cell type-specific regulatory networks in blood lineage cell types
Source: PubMed Central journal article supplement (PMC8830683; doi:10.1371/journal.pgen.1009984), 2022-01-31
Supplement: pgen.1009984.s024.pdf [file pgen.1009984.s024.pdf]

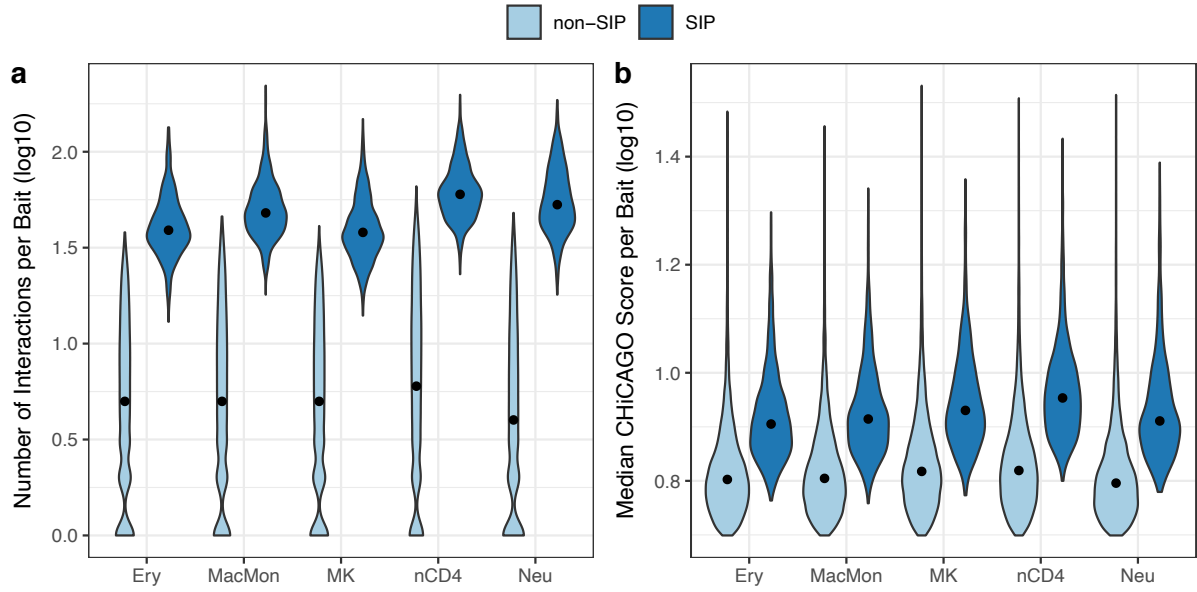

**S22 Fig. SIP patterns when detected using a maximum 1D genomic distance of 1Mb (Javierre et al pcHi-C data)** (A) The distribution of the number of significant interactions (log10 scale) for SIPs and non-SIPs; (B). The distribution of the median CHiCAGO (log10 scale) of significant interactions per promoter bait for SIPs and non-SIPs.
