# Supplementary material for: Super interactive promoters provide insight into cell type-specific regulatory networks in blood lineage cell types
Source: PubMed Central journal article supplement (PMC8830683; doi:10.1371/journal.pgen.1009984), 2022-01-31
Supplement: pgen.1009984.s026.pdf [file pgen.1009984.s026.pdf]

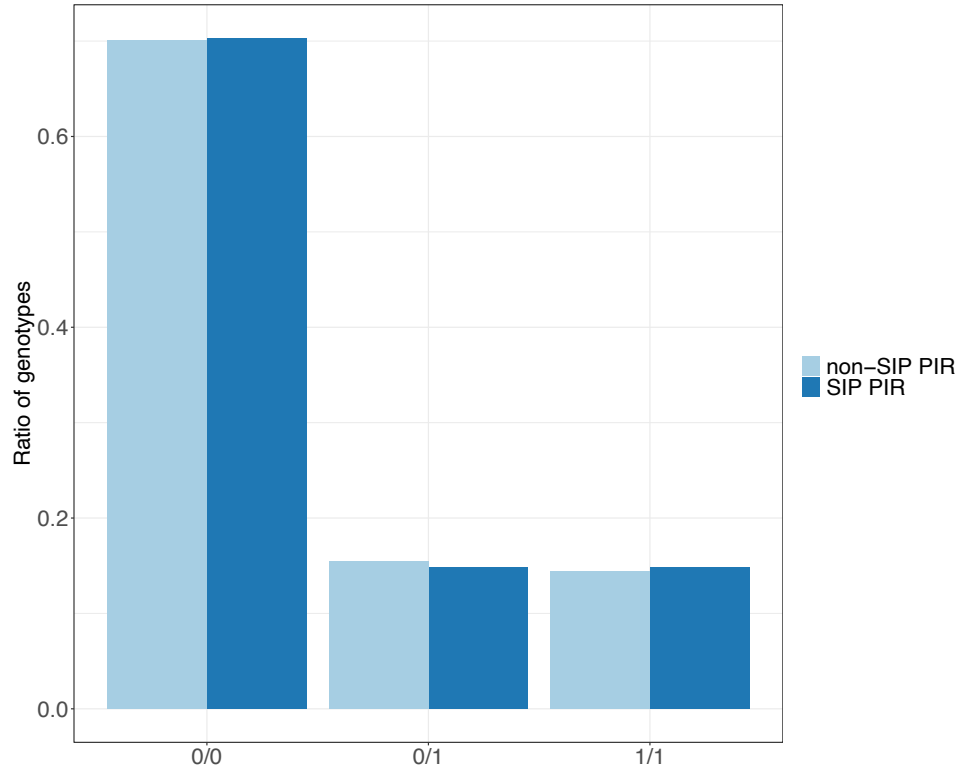

**S24 Fig. The K562 genotypes comparison for SIP PIRs and non-SIP PIRs.** “0/0” denotes homozygotes; “0/1” denotes heterozygotes; and “1/1” denotes alternative alleles homozygotes.
