# Supplementary material for: Super interactive promoters provide insight into cell type-specific regulatory networks in blood lineage cell types
Source: PubMed Central journal article supplement (PMC8830683; doi:10.1371/journal.pgen.1009984), 2022-01-31
Supplement: pgen.1009984.s027.pdf [file pgen.1009984.s027.pdf]

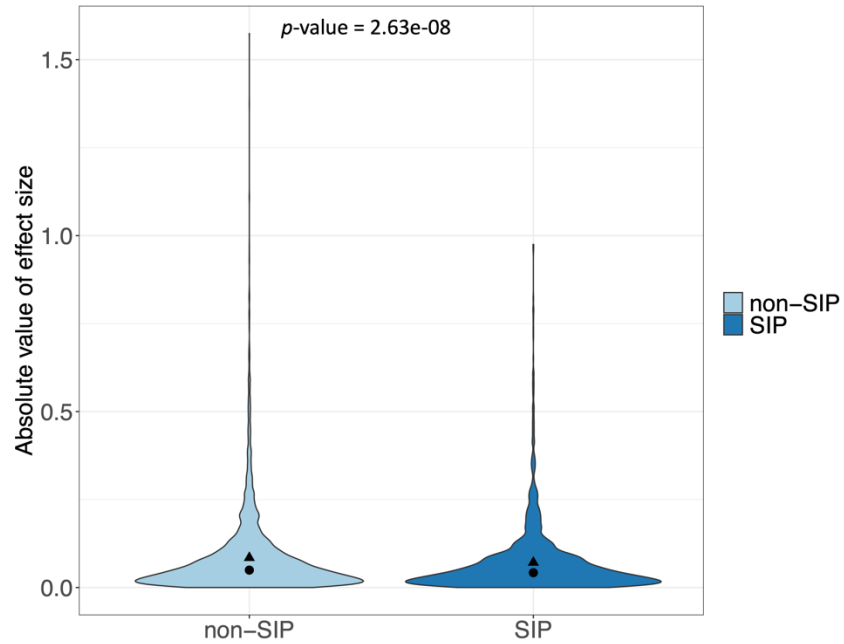

**S25 Fig. Effect size when perturbing PIRs, SIPs versus non-SIPs.** Effect sizes are from CRISPRi experiments in Gasperini et al[1]. Dots denote median, and triangles denote mean.

### Reference

1. Gasperini M, Hill AJ, McFaline-Figueroa JL, Martin B, Kim S, Zhang MD, et al. A Genome-wide Framework for Mapping Gene Regulation via Cellular Genetic Screens. *Cell*. 2019;176(1-2):377-90 e19. Epub 2019/01/08. doi: 10.1016/j.cell.2018.11.029. PubMed PMID: 30612741; PubMed Central PMCID: PMC6690346.
