# Supplementary material for: Super interactive promoters provide insight into cell type-specific regulatory networks in blood lineage cell types
Source: PubMed Central journal article supplement (PMC8830683; doi:10.1371/journal.pgen.1009984), 2022-01-31
Supplement: pgen.1009984.s030.pdf [file pgen.1009984.s030.pdf]

**S3 Table. SIP PIRs overlap with ATAC-seq peak regions.** Details corresponding to **Fig. 3**. For each cell type, the number of SIP PIRs and non-SIP PIRs that overlap with a cell type-specific ATAC-seq peak region are reported, along with the corresponding ratio and Chi-square p-value. The median (Med.) and average (Avg.) number of PIR interactions overlapping an ATAC-seq peak and corresponding t-test p-value for the difference between SIP and non-SIP PIRs is also reported. (Ovlp. = Overlap; Ery = erythrocyteIcMon = macrophages/monocytes; MK = megakaryocytes; nCD4 = naive CD4 T-cells; Neu = neutrophils)

| Bait Type     | # Overlap | # No Overlap | Ratio | Chi-sq p-value | Med. # Ovlp. | Avg. # Ovlp. | t p-value |
|---------------|-----------|--------------|-------|----------------|--------------|--------------|-----------|
| <b>Ery</b>    |           |              |       |                |              |              |           |
| SIP           | 1,118     | 39           | 0.97  | 5.3e-118       | 8            | 9.4          | 1.2e-162  |
| non-SIP       | 8,255     | 4,857        | 0.63  |                | 1            | 1.9          |           |
| <b>MacMon</b> |           |              |       |                |              |              |           |
| SIP           | 798       | 10           | 0.99  | 8.9e-52        | 12           | 12.8         | 2.7e-172  |
| non-SIP       | 9,491     | 3,070        | 0.76  |                | 2            | 2.6          |           |
| <b>MK</b>     |           |              |       |                |              |              |           |
| SIP           | 1,285     | 2            | 1.00  | 4.7e-63        | 12           | 13.5         | 6.3e-292  |
| non-SIP       | 10,645    | 2,424        | 0.81  |                | 2            | 2.9          |           |
| <b>nCD4</b>   |           |              |       |                |              |              |           |
| SIP           | 992       | 1            | 1.00  | 2.9e-45        | 22           | 23.3         | 2.1e-290  |
| non-SIP       | 10,315    | 2,142        | 0.83  |                | 3            | 4.4          |           |
