# Supplementary material for: Super interactive promoters provide insight into cell type-specific regulatory networks in blood lineage cell types
Source: PubMed Central journal article supplement (PMC8830683; doi:10.1371/journal.pgen.1009984), 2022-01-31
Supplement: pgen.1009984.s031.pdf [file pgen.1009984.s031.pdf]

**S4 Table. Around a third of the GWAS variants residing in the SIP PIR regions disrupt the transcript factor binding motifs.**

| <b>Cell type</b> | <b># Variants in SIP PIRs</b> | <b>#(%) disrupting motifs</b> |
|------------------|-------------------------------|-------------------------------|
| <b>Ery</b>       | 369                           | 132 (35.8%)                   |
| <b>MacMon</b>    | 149                           | 59 (39.6%)                    |
| <b>MK</b>        | 249                           | 88 (35.3%)                    |
| <b>nCD4</b>      | 222                           | 57(25.7%)                     |
| <b>Neu</b>       | 208                           | 69 (33.2%)                    |
