# Supplementary material for: Super interactive promoters provide insight into cell type-specific regulatory networks in blood lineage cell types
Source: PubMed Central journal article supplement (PMC8830683; doi:10.1371/journal.pgen.1009984), 2022-01-31
Supplement: pgen.1009984.s032.pdf [file pgen.1009984.s032.pdf]

**S5 Table. Cell-type-specific CTCF Enrichment analysis for SIPs versus non-SIPs in K562 and**

**GM12878.** With applying fisher exact test, SIPs highly enriched for CTCF. K562 ORs = 2.46,  $p$ -value <

$2.2 \times 10^{-16}$  and GM12878 ORs = 2.92 and  $p$ -value <  $2.2 \times 10^{-16}$

| K562              | SIP | non-SIP |
|-------------------|-----|---------|
| Overlap with CTCF | 540 | 5071    |
| Non-CTCF          | 271 | 6281    |

| GM12878           | SIP | non-SIP |
|-------------------|-----|---------|
| Overlap with CTCF | 594 | 4835    |
| Non-CTCF          | 229 | 5439    |
