# Supplementary material for: Super interactive promoters provide insight into cell type-specific regulatory networks in blood lineage cell types
Source: PLoS Genet. 2022 Jan 31;18(1):e1009984. doi: 10.1371/journal.pgen.1009984 (PMC8830683; doi:10.1371/journal.pgen.1009984)
Supplement: S1 Dataset — Each sheet in the Excel file details the SIPs and SIP genes for each of the five cell types (Ery = erythrocytes; MacMon = macrophages/monocytes; MK = megakaryocytes; nCD4 = naive CD4 T-cells; Neu = neutrophils). The columns baitID, baitChr, baitStart, baitEnd, and baitName pertain to the promoter bait identifier, gene(s), and bait location (from the Javierre et al.1 pcHi-C data). The column intscore refers to the cumulative interaction score calculated to define SIPs, and the column rank reflects the order of SIP baits from largest score to smallest. Note that a SIP bait may have multiple genes and genes may correspond to multiple SIP baits. The column specific indicates if the SIP gene is only found in this particular cell type, and the column shared indicates if the SIP gene is shared across all five cell types. The next five columns, SIP.Ery, SIP.MacMon, SIP.MK, SIP.nCD4, and SIP.Neu, indicate whether that SIP is also found in the respective cell type. The column ENSEMBL_ID indicates the ENSEMBL ID (GRCh37), if found, for the gene names (baitName) provided in the pcHi-C data. The subsequent columns Ery, MacMon, MK, nCD4, and Neu, report the exponentiated BLUEPRINT gene expression (equivalent to RPKM) data in that cell type, if available. (XLSX) [file pgen.1009984.s033.xlsx]

## Sheet: Ery_SIPs
baitID	baitName	baitChr	baitStart	baitEnd	intscore	rank	specific	shared	SIP.Ery	SIP.MacMon	SIP.MK	SIP.nCD4	SIP.Neu	ENSEMBL_GENEID	Ery	MacMon	MK	nCD4	Neu
709190	AGPAT5	8	6563788	6569025	1949.68	1	0	0	1	1	1	1	0	ENSG00000155189	25.9126	4.46861	20.9331	3.74021	0.297159
709190	CTD-2541M15.1	8	6563788	6569025	1949.68	1	0	0	1	1	1	1	0	#N/A	#N/A	#N/A	#N/A	#N/A	#N/A
618814	HIST1H1B	6	27834351	27837620	1912.6	2	0	1	1	1	1	1	1	ENSG00000184357	1561.56	11.4028	565.383	5.05053	4.33652
618316	HIST1H3D	6	26196886	26199681	1694.22	3	0	1	1	1	1	1	1	ENSG00000197409	597.213	18.7233	236.833	42.3592	38.6729
618316	HIST1H2AD	6	26196886	26199681	1694.22	3	0	1	1	1	1	1	1	ENSG00000196866	236.795	8.98448	157.128	13.5618	20.2755
385358	ITGA4	2	182319283	182329022	1637.76	4	0	1	1	1	1	1	1	ENSG00000115232	77.4606	16.0505	9.68253	84.0206	27.5095
618793	HIST1H3H	6	27776624	27782228	1618.93	5	0	1	1	1	1	1	1	ENSG00000203813	843.862	12.7163	498.309	27.2094	5.52323
545596	RAPGEF2	4	160021754	160027306	1601.32	6	0	0	1	0	1	1	1	ENSG00000109756	96.5421	29.2681	38.2973	9.46902	256.213
545471	PPID	4	159642400	159646003	1494.22	7	0	1	1	1	1	1	1	ENSG00000171497	11.017	16.441	13.2937	9.44098	18.2803
618605	HIST1H2BK	6	27113447	27115524	1431.08	8	0	0	1	1	1	1	0	ENSG00000197903	795.22	89.6314	398.101	46.5763	82.4457
618605	HIST1H2AH	6	27113447	27115524	1431.08	8	0	0	1	1	1	1	0	ENSG00000184825	687.594	8.86157	241.939	6.30879	2.8195
618605	MIR3143	6	27113447	27115524	1431.08	8	0	0	1	1	1	1	0	ENSG00000265565	6.83567e-05	7.12037e-05	7.03027e-05	7.94879e-05	0.000279928
618285	HIST1H2AB	6	26032305	26034591	1410.78	9	0	1	1	1	1	1	1	ENSG00000137259	239.964	3.68182	79.9811	3.44912	1.99238
765974	PIP5K1B	9	71315116	71321918	1402.87	10	0	0	1	0	1	0	1	ENSG00000107242	29.6226	0.372021	6.57225	0.13459	7.56326
239267	RYR3	15	33599049	33605679	1398.23	11	0	0	1	0	1	0	0	ENSG00000198838	2.51322	0.0146386	2.93236	0.0186898	0.0448471
239267	RP11-489D6.2	15	33599049	33605679	1398.23	11	0	0	1	0	1	0	0	#N/A	#N/A	#N/A	#N/A	#N/A	#N/A
618816	HIST1H4L	6	27840382	27845139	1368.99	12	0	1	1	1	1	1	1	ENSG00000198558	521.795	6.56317	146.719	9.44892	0.933625
618010	RP3-522P13.1	6	25254994	25266229	1359.68	13	0	0	1	1	1	1	0	#N/A	#N/A	#N/A	#N/A	#N/A	#N/A
618010	RP3-522P13.3	6	25254994	25266229	1359.68	13	0	0	1	1	1	1	0	#N/A	#N/A	#N/A	#N/A	#N/A	#N/A
709153	ANGPT2	8	6418661	6423639	1347.98	14	0	0	1	0	1	0	0	ENSG00000091879	0.0107902	0.00210333	0.000643546	0.00818288	0.00197009
344502	AC010883.5	2	43455071	43460452	1344.8	15	0	1	1	1	1	1	1	#N/A	#N/A	#N/A	#N/A	#N/A	#N/A
618802	HIST1H4K	6	27792447	27801291	1341.92	16	0	1	1	1	1	1	1	ENSG00000197914	387.542	30.0496	129.159	21.1429	5.39779
575102	ADAMTS6	5	64777556	64778174	1337.78	17	0	0	1	1	1	1	0	ENSG00000049192	0.895145	0.273552	0.894438	3.34677	0.0283579
527386	SLC9B1	4	103935166	103941497	1309.29	18	0	1	1	1	1	1	1	ENSG00000164037	0.333896	0.37186	1.06588	2.07397	0.0618588
34158	RNU2-38P	1	144941765	144945045	1259.21	19	0	1	1	1	1	1	1	ENSG00000222788	4.84736e-05	4.50649e-05	5.26262e-05	5.50288e-05	0.00022157
618815	HIST1H3I	6	27837621	27840381	1246.54	20	0	1	1	1	1	1	1	ENSG00000182572	350.999	8.24655	136.959	9.39805	1.42315
119460	TIMM10	11	57295377	57298400	1243.47	21	0	1	1	1	1	1	1	ENSG00000134809	15.7948	17.7967	12.9067	6.71599	2.88562
618284	HIST1H3B	6	26031513	26032304	1221.96	22	0	0	1	0	1	1	1	ENSG00000124693	1800.01	5.89869	673.044	3.75235	3.75503
709113	MCPH1	8	6261206	6270887	1206.59	23	0	0	1	1	1	1	0	ENSG00000147316	9.03616	6.5719	9.02914	11.2847	1.03404
709113	RP11-115C21.2	8	6261206	6270887	1206.59	23	0	0	1	1	1	1	0	#N/A	#N/A	#N/A	#N/A	#N/A	#N/A
624525	RHAG	6	49603508	49606393	1182.79	24	0	0	1	0	1	0	0	ENSG00000112077	212.753	9.93428e-05	125.381	0.000266225	0.000205726
618822	HIST1H2AM	6	27858120	27861034	1163.86	25	0	1	1	1	1	1	1	ENSG00000233224	684.801	16.7619	318.562	12.9835	4.26226
618822	HIST1H3J	6	27858120	27861034	1163.86	25	0	1	1	1	1	1	1	ENSG00000197153	304.9	1.44116	116.62	1.47262	0.388914
618801	HIST1H4J	6	27790966	27792446	1138.74	26	0	1	1	1	1	1	1	ENSG00000197238	1519.63	149.216	716.802	65.8807	48.1972
477302	STAG1	3	136465351	136472558	1130.11	27	0	1	1	1	1	1	1	ENSG00000118007	16.9564	10.2478	15.3707	19.94	47.4653
477302	RP11-102M11.2	3	136465351	136472558	1130.11	27	0	1	1	1	1	1	1	#N/A	#N/A	#N/A	#N/A	#N/A	#N/A
745034	SQLE	8	126007452	126015447	1123.7	28	0	0	1	1	1	0	0	ENSG00000104549	43.9984	10.4088	130.072	1.69684	0.320459
745034	RP11-6D1.3	8	126007452	126015447	1123.7	28	0	0	1	1	1	0	0	#N/A	#N/A	#N/A	#N/A	#N/A	#N/A
268169	BRD7	16	50395469	50403807	1115.49	29	0	1	1	1	1	1	1	ENSG00000166164	23.7436	21.7397	27.9989	28.9005	20.2925
268169	RP11-21B23.1	16	50395469	50403807	1115.49	29	0	1	1	1	1	1	1	#N/A	#N/A	#N/A	#N/A	#N/A	#N/A
766064	PRKACG	9	71624507	71632801	1091.36	30	0	1	1	1	1	1	1	ENSG00000165059	6.30662e-05	3.01209e-07	2.0293e-07	2.99798e-07	1.29391e-06
229055	GTF2A1	14	81685218	81688296	1085.59	31	0	1	1	1	1	1	1	ENSG00000165417	11.6525	7.85732	20.6595	7.94501	20.0407
176716	MED13L	12	116714223	116718352	1063.59	32	0	1	1	1	1	1	1	ENSG00000123066	33.8541	16.416	21.2979	39.1272	290.516
718428	WHSC1L1	8	38237182	38242579	1063.55	33	0	1	1	1	1	1	1	ENSG00000147548	22.4932	14.5518	19.8235	61.1029	88.1471
718428	RP11-350N15.5	8	38237182	38242579	1063.55	33	0	1	1	1	1	1	1	#N/A	#N/A	#N/A	#N/A	#N/A	#N/A
129654	RP11-712B9.2	11	94879591	94887222	1058.82	34	0	1	1	1	1	1	1	#N/A	#N/A	#N/A	#N/A	#N/A	#N/A
618602	HIST1H4I	6	27106418	27107452	1053.97	35	0	0	1	1	1	1	0	ENSG00000198339	76.7592	3.77976	21.857	0.641986	0.560487
289005	HOXB3	17	46660464	46668809	1046.75	36	0	0	1	1	1	1	0	ENSG00000120093	1.27295	0.0261368	1.34026	0.644999	0.0600476
289005	HOXB-AS3	17	46660464	46668809	1046.75	36	0	0	1	1	1	1	0	ENSG00000233101	0.0355555	0.0460385	0.0490579	0.0471214	0.164076
682717	RHBDD2	7	75471491	75472111	1038.24	37	0	0	1	0	0	1	1	ENSG00000005486	9.47554	6.71223	3.16429	10.0392	23.5574
468737	CD47	3	107809073	107817390	1036.44	38	0	0	1	1	1	0	1	ENSG00000196776	49.3234	62.1104	209.148	82.8357	76.8481
95927	SMNDC1	10	112061091	112067985	1026.77	39	0	1	1	1	1	1	1	ENSG00000119953	10.5421	6.34154	12.2569	9.81939	32.1273
60196	IRF2BP2	1	234740384	234749444	990.783	40	0	1	1	1	1	1	1	ENSG00000168264	103.677	30.8216	29.0395	55.3849	36.6449
60196	RP4-781K5.2	1	234740384	234749444	990.783	40	0	1	1	1	1	1	1	#N/A	#N/A	#N/A	#N/A	#N/A	#N/A
618317	HIST1H4E	6	26199682	26205858	989.802	41	0	1	1	1	1	1	1	ENSG00000198518	266.075	34.5251	119.385	70.7302	7.15145
618317	HIST1H2BF	6	26199682	26205858	989.802	41	0	1	1	1	1	1	1	ENSG00000197846	192.24	3.42812	91.2966	6.10619	13.8767
618317	RP1-34B20.4	6	26199682	26205858	989.802	41	0	1	1	1	1	1	1	#N/A	#N/A	#N/A	#N/A	#N/A	#N/A
135697	NNMT	11	114127328	114130511	987.939	42	0	1	1	1	1	1	1	ENSG00000166741	0.00937446	0.0206702	0.0517763	0.052624	0.0444055
17777	ZRANB2	1	71530008	71535732	986.279	43	0	0	1	1	1	1	0	ENSG00000132485	24.6513	16.0639	31.4093	51.8654	19.817
17777	MIR186	1	71530008	71535732	986.279	43	0	0	1	1	1	1	0	ENSG00000207721	2.668e-05	4.6179e-05	3.2403e-05	4.87406e-05	0.000139002
246874	ADAM10	15	59040631	59042709	982.741	44	0	0	1	1	1	1	0	ENSG00000137845	27.1058	63.0397	170.494	33.81	184.835
664967	ARL4A	7	12724826	12728593	978.657	45	0	0	1	1	1	0	0	ENSG00000122644	110.677	8.2863	3.41086	6.51248	1.53169
664967	CTD-2320J21.1	7	12724826	12728593	978.657	45	0	0	1	1	1	0	0	#N/A	#N/A	#N/A	#N/A	#N/A	#N/A
727693	NCOA2	8	71313105	71317335	966.988	46	0	1	1	1	1	1	1	ENSG00000140396	14.1907	10.1116	14.2572	16.3749	176.816
301599	LDLRAD4	18	13216144	13218929	965.283	47	0	0	1	1	1	1	0	ENSG00000168675	6.42646	8.30607	23.0902	13.9178	7.03375
301599	RP11-794M8.1	18	13216144	13218929	965.283	47	0	0	1	1	1	1	0	#N/A	#N/A	#N/A	#N/A	#N/A	#N/A
592091	TNFAIP8	5	118600720	118609276	962.026	48	0	1	1	1	1	1	1	ENSG00000145779	13.6875	28.1757	58.5246	115.494	33.6406
136563	SIK3	11	116968002	116974060	954.519	49	0	1	1	1	1	1	1	ENSG00000160584	15.1797	7.78039	6.37627	11.1881	82.603
136563	AP000936.4	11	116968002	116974060	954.519	49	0	1	1	1	1	1	1	#N/A	#N/A	#N/A	#N/A	#N/A	#N/A
568582	HMGCS1	5	43310396	43314230	944.206	50	0	1	1	1	1	1	1	ENSG00000112972	83.4284	16.0972	124.791	5.96189	18.2199
495425	RP11-135A1.2	3	193847776	193849045	943.705	51	0	0	1	1	1	0	0	#N/A	#N/A	#N/A	#N/A	#N/A	#N/A
626912	DST	6	56816016	56821197	941.5	52	0	0	1	0	1	0	0	ENSG00000151914	8.46596	10.9295	7.19016	2.26991	0.350133
626912	BEND6	6	56816016	56821197	941.5	52	0	0	1	0	1	0	0	ENSG00000151917	0.0996919	0.0204108	0.0974048	0.00678638	0.048643
535855	JADE1	4	129730071	129736122	938.203	53	0	0	1	1	1	1	0	ENSG00000077684	14.1351	3.85314	7.89803	16.275	41.0946
585677	CHD1	5	98258843	98266385	921.69	54	0	1	1	1	1	1	1	ENSG00000153922	30.4201	20.4624	20.6748	55.5774	131.845
585677	CTD-2007H13.3	5	98258843	98266385	921.69	54	0	1	1	1	1	1	1	#N/A	#N/A	#N/A	#N/A	#N/A	#N/A
344501	ZFP36L2	2	43450920	43455070	914.802	55	0	0	1	1	1	1	0	ENSG00000152518	23.9376	9.71476	1.78959	42.1581	65.9906
618330	HIST1H4G	6	26244367	26249842	911.888	56	0	0	1	1	1	0	0	ENSG00000124578	0.423371	1.98198e-06	1.47423e-06	2.17685e-06	6.12432e-06
44696	GLUL	1	182354704	182363894	905.984	57	0	1	1	1	1	1	1	ENSG00000135821	361.551	254.509	424.931	14.6194	2047.36
298632	MYL12B	18	3260099	3263541	905.906	58	0	1	1	1	1	1	1	ENSG00000118680	77.5353	176.974	129.774	101.26	310.234
298632	RP13-270P17.1	18	3260099	3263541	905.906	58	0	1	1	1	1	1	1	#N/A	#N/A	#N/A	#N/A	#N/A	#N/A
618331	HIST1H3F	6	26249843	26251379	905.845	59	0	0	1	0	1	1	0	ENSG00000256316	893.006	11.77	339.296	1.90424	1.98248
545573	C4orf45	4	159957977	159961100	904.901	60	1	0	1	0	0	0	0	ENSG00000164123	0.0313636	0.00173037	0.011177	0.00147773	0.0421485
126766	EED	11	85952696	85957638	904.896	61	0	1	1	1	1	1	1	ENSG00000074266	11.6657	10.3124	6.67187	12.472	7.97762
219789	VCPKMT	14	50568416	50584029	900.749	62	0	0	1	1	1	1	0	ENSG00000100483	4.46683	4.10854	2.99083	6.87998	38.0113
466198	TBC1D23	3	99975954	99981154	900.468	63	0	1	1	1	1	1	1	ENSG00000036054	19.9571	16.3719	19.3591	10.125	32.819
210678	CCNB1IP1	14	20795320	20806783	895.846	64	0	1	1	1	1	1	1	ENSG00000100814	9.28081	5.74974	26.0186	11.6479	0.662568
617998	RP11-191A15.4	6	25214810	25223692	889.761	65	0	0	1	1	1	1	0	#N/A	#N/A	#N/A	#N/A	#N/A	#N/A
645098	FAM26D	6	116849474	116856183	877.808	66	0	1	1	1	1	1	1	ENSG00000164451	0.00198751	0.00236695	0.00386812	0.00239486	0.00899857
352323	APLF	2	68691196	68695687	868.666	67	0	1	1	1	1	1	1	ENSG00000169621	2.23288	1.52888	4.71047	2.63441	0.767434
352323	FBXO48	2	68691196	68695687	868.666	67	0	1	1	1	1	1	1	ENSG00000204923	0.848384	0.599994	0.587664	0.542168	0.716829
116703	OR4C5	11	48386729	48389031	853.853	68	0	0	1	1	0	0	0	ENSG00000176540	5.34435e-07	5.71035e-07	3.8393e-07	5.60005e-07	2.18309e-06
126722	PICALM	11	85778970	85786092	852.08	69	0	1	1	1	1	1	1	ENSG00000073921	174.279	166.028	66.138	45.6557	1297.31
624572	PGK2	6	49752351	49757086	850.56	70	0	0	1	0	1	0	0	ENSG00000170950	1.58073e-07	2.52416e-07	2.4518e-07	3.25137e-07	1.02037e-06
103053	RHOG	11	3860032	3863125	845.449	71	0	1	1	1	1	1	1	ENSG00000177105	22.8657	34.3602	30.3847	12.5858	302.094
594658	MARCH3	5	126361828	126369387	842.988	72	0	0	1	1	1	0	1	ENSG00000173926	67.3504	1.58642	9.21869	3.21602	1.74728
626988	BAG2	6	57034829	57041039	840.827	73	0	0	1	0	1	1	0	ENSG00000112208	8.38516	1.2642	5.11544	4.92665	0.128848
626988	RP11-203B9.4	6	57034829	57041039	840.827	73	0	0	1	0	1	1	0	#N/A	#N/A	#N/A	#N/A	#N/A	#N/A
626940	KIAA1586	6	56910973	56917896	835.295	74	0	0	1	0	1	0	0	ENSG00000168116	16.6165	2.61266	12.5924	6.84014	0.422224
663419	GLCCI1	7	8007422	8012181	835.011	75	0	1	1	1	1	1	1	ENSG00000106415	5.59394	0.868178	5.01116	8.81012	16.0239
663419	AC006042.7	7	8007422	8012181	835.011	75	0	1	1	1	1	1	1	#N/A	#N/A	#N/A	#N/A	#N/A	#N/A
400909	AC017104.2	2	232316580	232318550	832.769	76	0	0	1	1	1	0	0	#N/A	#N/A	#N/A	#N/A	#N/A	#N/A
766012	RP11-203L2.4	9	71458015	71459083	832.007	77	0	0	1	1	1	0	1	#N/A	#N/A	#N/A	#N/A	#N/A	#N/A
618332	HIST1H2BH	6	26251380	26252421	830.889	78	0	0	1	0	1	0	0	ENSG00000197459	827.889	14.5465	380.631	8.46991	3.79356
219784	C14orf183	14	50554130	50562914	829.352	79	0	0	1	1	1	1	0	ENSG00000168260	0.000180632	0.0156863	0.0773372	0.0929649	2.50547
219784	RP11-58E21.5	14	50554130	50562914	829.352	79	0	0	1	1	1	1	0	#N/A	#N/A	#N/A	#N/A	#N/A	#N/A
219784	RP11-58E21.7	14	50554130	50562914	829.352	79	0	0	1	1	1	1	0	#N/A	#N/A	#N/A	#N/A	#N/A	#N/A
404711	RPS18P1	20	5505191	5515865	824.598	80	0	1	1	1	1	1	1	ENSG00000225831	0.0588731	1.23913e-06	1.47345e-06	1.56323e-06	4.73811e-06
404711	RP5-1022P6.5	20	5505191	5515865	824.598	80	0	1	1	1	1	1	1	#N/A	#N/A	#N/A	#N/A	#N/A	#N/A
210676	SNORD126	14	20793945	20795295	824.038	81	0	1	1	1	1	1	1	ENSG00000238344	4.03027e-05	4.82772e-05	5.75557e-05	4.9796e-05	0.000216023
477158	MSL2	3	135913712	135916257	823.933	82	0	1	1	1	1	1	1	ENSG00000174579	12.1975	5.99945	11.1504	27.8167	56.1853
35706	CGN	1	151496436	151509686	821.297	83	0	0	1	1	1	0	0	ENSG00000143375	0.0996161	0.0158489	0.0472862	0.10591	0.0444875
35706	SNORA44	1	151496436	151509686	821.297	83	0	0	1	1	1	0	0	#N/A	#N/A	#N/A	#N/A	#N/A	#N/A
34299	ANKRD35	1	145546608	145551233	809.144	84	0	1	1	1	1	1	1	ENSG00000198483	0.0605043	0.067849	0.236021	0.00490205	0.00073529
718364	RP11-90P5.7	8	38020002	38026897	808.851	85	0	0	1	0	1	0	0	#N/A	#N/A	#N/A	#N/A	#N/A	#N/A
167745	NTS	12	86266460	86278365	807.102	86	0	0	1	1	1	0	0	ENSG00000133636	0.775898	0.000597806	0.0457131	0.00082644	0.0019302
416606	ZNF217	20	52225205	52226927	806.262	87	0	1	1	1	1	1	1	ENSG00000171940	17.5282	12.6259	10.215	17.9169	106.212
34292	PEX11B	1	145513771	145516282	790.862	88	0	0	1	1	1	1	0	ENSG00000131779	4.46844	7.18396	6.29211	6.45084	4.58342
34292	GNRHR2	1	145513771	145516282	790.862	88	0	0	1	1	1	1	0	ENSG00000211451	1.9101	1.84621	2.59499	3.79011	8.54137
490927	ZNF639	3	179037674	179041914	788.358	89	0	0	1	1	1	1	0	ENSG00000121864	15.7876	7.97461	15.1779	29.2418	2.56365
618600	HIST1H2BJ	6	27099102	27106153	787.39	90	0	0	1	1	1	1	0	ENSG00000124635	461.522	11.3946	161.199	13.1824	9.77241
618600	HIST1H2AG	6	27099102	27106153	787.39	90	0	0	1	1	1	1	0	ENSG00000196787	176.062	2.49544	54.4827	9.61067	1.59081
618015	LRRC16A	6	25276461	25285841	787.313	91	0	0	1	1	1	1	0	ENSG00000079691	1.94917	1.91271	18.6636	4.47586	0.0447495
210745	RNASE11	14	21076915	21084877	787.257	92	0	1	1	1	1	1	1	ENSG00000173464	0.0107026	0.0135668	0.0118398	0.0138618	0.0517969
756550	HAUS6	9	19096942	19105169	779.038	93	0	0	1	1	1	1	0	ENSG00000147874	14.3508	3.92477	8.4257	7.3159	2.75775
44154	ACBD6	1	180471076	180472609	776.862	94	0	0	1	1	1	1	0	ENSG00000135847	12.5516	8.04989	13.1359	16.8487	1.80932
158337	ZBTB39	12	57399089	57400611	776.782	95	0	0	1	1	1	0	0	ENSG00000166860	2.79703	1.0749	3.41336	2.08397	0.01698
768882	GNAQ	9	80637139	80648673	774.166	96	0	1	1	1	1	1	1	ENSG00000156052	16.6449	23.5134	55.5074	12.1009	145.333
346013	PPP1R21	2	48662849	48668705	771.312	97	0	1	1	1	1	1	1	ENSG00000162869	6.36512	6.6581	6.59108	9.9198	45.6875
346013	RP11-191L17.1	2	48662849	48668705	771.312	97	0	1	1	1	1	1	1	#N/A	#N/A	#N/A	#N/A	#N/A	#N/A
627024	PRIM2	6	57178586	57180002	770.726	98	0	0	1	1	1	1	0	ENSG00000146143	10.549	4.17226	6.91763	5.32666	0.925982
618339	HIST1H3G	6	26271042	26283090	762.012	99	0	1	1	1	1	1	1	ENSG00000256018	562.15	1.44009	205.89	0.535966	1.05074
618339	HIST1H2BI	6	26271042	26283090	762.012	99	0	1	1	1	1	1	1	ENSG00000168242	465.187	15.0098	170.638	30.3822	5.2769
618339	HIST1H2APS4	6	26271042	26283090	762.012	99	0	1	1	1	1	1	1	ENSG00000218690	1.26002	0.00105574	0.256106	0.0105117	0.000603326
618328	HIST1H4F	6	26238741	26244133	757.667	100	1	0	1	0	0	0	0	ENSG00000198327	481.21	19.0922	149.965	33.2331	4.44524
263985	CDR2	16	22382046	22386791	755.579	101	1	0	1	0	0	0	0	ENSG00000140743	20.1711	5.15839	10.1473	27.4317	1.54253
263985	RP11-21M24.2	16	22382046	22386791	755.579	101	1	0	1	0	0	0	0	#N/A	#N/A	#N/A	#N/A	#N/A	#N/A
618812	HIST1H2AL	6	27829816	27834320	754.824	102	0	0	1	1	1	0	1	ENSG00000198374	440.788	9.47738	162.964	2.12069	4.57612
618812	HIST1H2BPS2	6	27829816	27834320	754.824	102	0	0	1	1	1	0	1	ENSG00000217646	2.82637	0.000852969	0.395761	2.68031e-05	2.91285e-05
119440	SLC43A3	11	57188288	57197725	753.072	103	0	0	1	1	1	0	1	ENSG00000134802	89.1418	42.2597	67.0738	1.56179	3.13449
119440	RP11-872D17.8	11	57188288	57197725	753.072	103	0	0	1	1	1	0	1	ENSG00000254979	17.9948	0.554955	2.84209	0.0177883	0.00509742
718429	LETM2	8	38242580	38252729	750.527	104	0	1	1	1	1	1	1	ENSG00000165046	0.546388	0.593461	0.711593	0.433718	8.91758
596929	JADE2	5	133907439	133923113	745.568	105	0	1	1	1	1	1	1	ENSG00000043143	2.90176	4.30896	6.96811	27.4706	10.5747
257844	IGF1R	15	99191269	99194977	745.511	106	0	1	1	1	1	1	1	ENSG00000140443	9.48109	3.28324	15.9481	19.2093	129.633
424476	RNU6-872P	21	30112950	30117523	739.882	107	0	0	1	1	1	1	0	ENSG00000251894	2.54037e-05	4.73786e-05	4.52181e-05	4.76907e-05	0.000132683
119415	SSRP1	11	57103304	57107461	739.546	108	0	1	1	1	1	1	1	ENSG00000149136	48.5828	15.3734	21.8642	17.5224	0.181965
119415	P2RX3	11	57103304	57107461	739.546	108	0	1	1	1	1	1	1	ENSG00000109991	0.00192037	0.000884515	0.000579267	0.000674956	0.00378156
745878	MYC	8	128745991	128756979	739.131	109	0	0	1	0	1	1	1	ENSG00000136997	38.1091	4.07646	38.1687	45.73	0.0170153
745878	CASC11	8	128745991	128756979	739.131	109	0	0	1	0	1	1	1	ENSG00000249375	0.0203587	0.0251078	0.00577895	0.0792198	0.00167314
345976	FOXN2	2	48539228	48543709	738.671	110	0	1	1	1	1	1	1	ENSG00000170802	28.449	16.5412	47.3033	19.6592	52.8439
125673	PRCP	11	82610457	82615041	738.332	111	0	1	1	1	1	1	1	ENSG00000137509	9.66063	68.339	8.17982	6.97555	74.2009
125673	C11orf82	11	82610457	82615041	738.332	111	0	1	1	1	1	1	1	ENSG00000165490	4.72172	2.73601	2.24033	0.300283	2.07657
632164	COL12A1	6	75904747	75916837	737.541	112	0	1	1	1	1	1	1	ENSG00000111799	0.0109899	0.00715289	0.0113552	0.0171386	0.0547544
391663	CFLAR-AS1	2	202020801	202025048	737.058	113	0	0	1	0	1	0	1	ENSG00000226312	0.0386866	0.119012	0.0601314	0.0529119	0.944348
125742	PCF11	11	82867223	82868255	733.694	114	0	1	1	1	1	1	1	ENSG00000165494	29.1246	33.1421	34.597	88.9962	199.927
400910	SNORA75	2	232318551	232321429	732.339	115	0	0	1	1	1	0	0	ENSG00000206885	26.6781	10.08	8.82507	10.367	86.9822
400910	SNORD20	2	232318551	232321429	732.339	115	0	0	1	1	1	0	0	ENSG00000207280	2.54319e-05	5.45304e-05	3.25042e-05	4.57481e-05	0.000147719
608571	BOD1	5	173040111	173048561	731.713	116	0	1	1	1	1	1	1	ENSG00000145919	2.95072	8.49511	2.95335	13.831	1.67473
618287	HIST1H1C	6	26050869	26060424	727.602	117	0	0	1	0	0	0	1	ENSG00000187837	1578.7	83.8327	797.613	183.13	106.92
765998	FAM122A	9	71389003	71399003	727.3	118	0	0	1	0	1	1	1	ENSG00000187866	6.9319	3.3863	3.47646	3.68559	6.64345
477291	RNU6-789P	3	136440038	136444003	722.28	119	0	0	1	0	1	0	1	ENSG00000252914	2.72733e-05	3.13255e-05	2.08935e-05	3.15385e-05	0.000106334
276823	CMIP	16	81475083	81484443	719.775	120	0	0	1	1	1	0	1	ENSG00000153815	10.374	3.79662	68.0934	2.52139	67.7328
44700	TEDDM1	1	182366080	182374429	719.517	121	0	1	1	1	1	1	1	ENSG00000203730	2.40277e-05	6.14551e-07	4.09051e-06	2.07892e-07	0.000316583
120843	TMEM179B	11	62552270	62559742	719.327	122	0	1	1	1	1	1	1	ENSG00000185475	12.8474	27.065	12.3714	10.2754	23.9122
120843	TMEM223	11	62552270	62559742	719.327	122	0	1	1	1	1	1	1	ENSG00000168569	3.58206	4.00344	4.3195	3.09216	0.165967
120843	RP11-727F15.12	11	62552270	62559742	719.327	122	0	1	1	1	1	1	1	#N/A	#N/A	#N/A	#N/A	#N/A	#N/A
655522	RP11-162J8.3	6	149352592	149354190	717.541	123	0	1	1	1	1	1	1	#N/A	#N/A	#N/A	#N/A	#N/A	#N/A
93636	CNNM2	10	104673556	104680672	715.528	124	0	0	1	1	1	0	0	ENSG00000148842	6.88227	1.09071	1.87769	2.3727	0.37258
93636	RP11-724N1.1	10	104673556	104680672	715.528	124	0	0	1	1	1	0	0	#N/A	#N/A	#N/A	#N/A	#N/A	#N/A
683200	TMEM60	7	77426595	77434807	714.162	125	0	1	1	1	1	1	1	ENSG00000135211	9.07782	10.216	9.76056	2.37804	6.33916
683200	PHTF2	7	77426595	77434807	714.162	125	0	1	1	1	1	1	1	ENSG00000006576	8.90252	9.28992	13.7817	7.45398	6.67558
710930	RNU6-842P	8	12900927	12906922	712.095	126	0	0	1	1	1	0	0	ENSG00000206996	1.57502e-05	2.80437e-05	2.9739e-05	2.79971e-05	9.30159e-05
716104	GTF2E2	8	30514629	30526394	703.682	127	0	0	1	0	1	1	1	ENSG00000197265	6.20325	13.1007	7.65042	9.91871	11.9584
545479	FNIP2	4	159685698	159692559	702.611	128	0	0	1	1	1	1	0	ENSG00000052795	19.3341	41.9593	5.56845	3.54187	0.822049
696387	CPED1	7	120624850	120629938	698.471	129	0	0	1	1	1	1	0	ENSG00000106034	12.1515	2.91503	1.84843	0.0511007	0.0549188
210776	ANG	14	21148274	21153239	695.799	130	0	0	1	1	1	1	0	ENSG00000214274	0.150841	2.07079	0.0933312	0.0253824	0.0215342
210776	RNASE4	14	21148274	21153239	695.799	130	0	0	1	1	1	1	0	ENSG00000258818	0.0431046	1.05907	0.0127867	0.00487885	0.00453085
210776	AL163636.6	14	21148274	21153239	695.799	130	0	0	1	1	1	1	0	#N/A	#N/A	#N/A	#N/A	#N/A	#N/A
583213	ARRDC3	5	90678873	90679948	694.783	131	0	1	1	1	1	1	1	ENSG00000113369	18.4269	10.3945	10.6064	30.2543	200.246
190940	DHRS12	13	52377096	52384957	693.404	132	0	0	1	1	1	1	0	ENSG00000102796	1.03523	3.59908	1.22069	6.53347	62.6409
190940	RP11-327P2.5	13	52377096	52384957	693.404	132	0	0	1	1	1	1	0	#N/A	#N/A	#N/A	#N/A	#N/A	#N/A
618311	HIST1H2BE	6	26163576	26185586	691.114	133	0	0	1	0	0	1	1	ENSG00000197697	521.218	7.20241	201.957	14.239	2.09244
618311	LARP1P1	6	26163576	26185586	691.114	133	0	0	1	0	0	1	1	ENSG00000217159	0.51382	5.1202e-05	0.191841	3.12877e-06	0.000838323
572732	PLK2	5	57752380	57757252	691.061	134	0	0	1	1	1	1	0	ENSG00000145632	5.47079	1.26182	1.00176	1.66194	9.44247
522203	AFF1	4	87852276	87859763	690.556	135	0	0	1	0	1	1	0	ENSG00000172493	50.0513	12.662	29.3222	12.3408	79.7328
522203	C4orf36	4	87852276	87859763	690.556	135	0	0	1	0	1	1	0	ENSG00000163633	2.6933	2.56768	3.78611	1.88653	8.10494
76935	NPY4R	10	47081572	47089303	688.323	136	0	0	1	1	1	0	0	ENSG00000204174	3.99448e-05	0.000157473	3.88795e-05	8.48235e-05	0.00016856
647970	HDDC2	6	125619175	125633062	688.232	137	0	0	1	1	1	1	0	ENSG00000111906	7.87233	8.77692	2.89867	6.59848	0.451782
263658	TMEM159	16	21166049	21171878	686.109	138	0	0	1	1	1	0	0	ENSG00000011638	1.95651	9.08541	5.81889	4.62568	1.69036
263658	DNAH3	16	21166049	21171878	686.109	138	0	0	1	1	1	0	0	ENSG00000158486	0.00320003	0.00585339	0.00934853	0.00215137	0.00799382
732526	CA2	8	86374486	86381631	684.432	139	0	1	1	1	1	1	1	ENSG00000104267	25.3482	28.051	17.5164	0.0421203	1.2016
732526	RP11-317J10.2	8	86374486	86381631	684.432	139	0	1	1	1	1	1	1	#N/A	#N/A	#N/A	#N/A	#N/A	#N/A
35392	VPS45	1	150038459	150040151	683.054	140	0	0	1	1	1	0	0	ENSG00000136631	8.99194	14.4895	13.8515	10.2441	0.511114
35415	PLEKHO1	1	150113719	150130464	681.505	141	0	0	1	1	1	1	0	ENSG00000023902	4.07829	80.1975	24.56	12.9147	114.534
135010	PPP2R1B	11	111633900	111637819	679.759	142	0	0	1	0	1	1	0	ENSG00000137713	14.9333	12.4306	9.89731	9.51213	3.53683
615252	RNU6-1114P	6	16199919	16205578	679.093	143	0	1	1	1	1	1	1	ENSG00000251831	2.44659e-05	2.62283e-05	3.17733e-05	2.61237e-05	0.000106011
357313	CAPG	2	85641313	85648227	675.88	144	0	0	1	1	1	0	1	ENSG00000042493	24.5201	627.699	4.64554	2.95979	20.0246
357313	SH2D6	2	85641313	85648227	675.88	144	0	0	1	1	1	0	1	ENSG00000152292	1.06716	0.0640063	0.0935204	0.0631795	0.2235
597963	BRD8	5	137507839	137517488	673.944	145	0	0	1	0	1	0	1	ENSG00000112983	24.7729	7.07065	12.5038	13.0163	56.1031
597963	KIF20A	5	137507839	137517488	673.944	145	0	0	1	0	1	0	1	ENSG00000112984	20.4817	0.27841	12.9758	0.0456747	0.087878
171839	SLC25A3	12	98986764	98989889	671.549	146	0	1	1	1	1	1	1	ENSG00000075415	169.68	179.868	154.114	117.177	104.014
527339	snoU13	4	103779780	103782893	669.424	147	0	1	1	0	1	1	1	#N/A	#N/A	#N/A	#N/A	#N/A	#N/A
315353	BCL2	18	60982875	60990419	665.718	148	0	0	1	1	1	1	0	ENSG00000171791	0.968686	2.44985	0.456576	57.2733	0.450871
558260	MARCH6	5	10350337	10355214	665.594	149	0	0	1	0	0	1	1	ENSG00000145495	30.4189	13.2515	36.1962	34.2802	69.2255
558260	CTD-2256P15.2	5	10350337	10355214	665.594	149	0	0	1	0	0	1	1	#N/A	#N/A	#N/A	#N/A	#N/A	#N/A
470002	ABHD10	3	111695488	111699177	664.773	150	0	0	1	1	1	1	0	ENSG00000144827	7.01643	20.7981	8.92078	10.4355	1.41123
618791	HIST1H2AI	6	27770375	27776273	664.523	151	0	0	1	1	1	0	0	ENSG00000196747	1019.97	13.0085	461.354	6.52991	6.28729
618791	HIST1H2BL	6	27770375	27776273	664.523	151	0	0	1	1	1	0	0	ENSG00000185130	464.079	8.98337	220.908	5.39849	2.16566
618791	HIST1H4PS1	6	27770375	27776273	664.523	151	0	0	1	1	1	0	0	ENSG00000217862	0.000838043	0.000262843	3.51675e-06	3.35249e-06	1.21149e-05
676377	IKZF1	7	50341186	50347256	662.395	152	0	1	1	1	1	1	1	ENSG00000185811	28.3743	20.3158	7.61835	113.136	127.514
759241	MOB3B	9	27527548	27531143	657.531	153	0	0	1	1	1	0	1	ENSG00000120162	4.7513	1.47989	0.0213536	0.0787422	0.458863
353835	BOLA3	2	74366447	74377888	655.169	154	0	0	1	1	1	1	0	ENSG00000163170	24.7976	12.6709	8.51188	7.0439	0.125516
353835	BOLA3-AS1	2	74366447	74377888	655.169	154	0	0	1	1	1	1	0	ENSG00000225439	1.75219	0.0998385	0.759723	0.307454	0.0114153
293211	SNORA76	17	62222582	62224253	653.799	155	0	0	1	1	1	1	0	ENSG00000266402	15.2892	1.93084	10.4775	15.1396	0.460169
293211	SNORD104	17	62222582	62224253	653.799	155	0	0	1	1	1	1	0	ENSG00000199753	1.58889	0.000596421	7.57663e-05	0.0668959	0.00463214
779300	RGS3	9	116204107	116209215	652.274	156	0	0	1	1	1	1	0	ENSG00000138835	2.17785	3.41626	9.68176	1.6624	36.1986
262390	RNU6-213P	16	15967544	15973082	651.789	157	0	0	1	1	1	0	0	ENSG00000206778	2.99e-05	2.74282e-05	2.18297e-05	2.4633e-05	0.000117263
143500	CHD4	12	6666582	6685049	650.235	158	0	0	1	0	1	1	0	ENSG00000111642	50.99	48.8787	109.873	35.2499	141.834
143500	NOP2	12	6666582	6685049	650.235	158	0	0	1	0	1	1	0	ENSG00000111641	9.70454	10.6251	8.21474	17.5543	6.7789
158334	GPR182	12	57387551	57392948	649.104	159	0	0	1	1	1	0	0	ENSG00000166856	5.45583e-05	4.78199e-07	3.31267e-07	1.02971e-06	1.02621e-06
158334	HBCBP	12	57387551	57392948	649.104	159	0	0	1	1	1	0	0	#N/A	#N/A	#N/A	#N/A	#N/A	#N/A
158334	RP11-474N8.5	12	57387551	57392948	649.104	159	0	0	1	1	1	0	0	#N/A	#N/A	#N/A	#N/A	#N/A	#N/A
253525	C15orf40	15	83679256	83681883	647.887	160	0	1	1	1	1	1	1	ENSG00000169609	5.96223	7.91476	5.08753	7.89042	4.94944
253525	RP11-382A20.7	15	83679256	83681883	647.887	160	0	1	1	1	1	1	1	#N/A	#N/A	#N/A	#N/A	#N/A	#N/A
529881	RP11-380D23.1	4	111435499	111440690	646.633	161	0	0	1	1	1	1	0	#N/A	#N/A	#N/A	#N/A	#N/A	#N/A
390635	PLCL1	2	198668910	198670337	643.932	162	0	0	1	1	1	1	0	ENSG00000115896	0.896734	4.26676	1.04116	18.6076	2.81137
470320	CD200R1	3	112693909	112695161	642.864	163	0	0	1	1	1	0	0	ENSG00000163606	0.816976	0.17841	0.722236	3.94986	0.500795
620931	COX6A1P2	6	36998125	37018814	638.924	164	0	0	1	0	1	0	0	ENSG00000226976	0.000298924	0.0275054	0.00447511	0.000284908	9.6781e-05
618341	HIST1H4H	6	26285060	26288843	638.253	165	0	0	1	1	1	1	0	ENSG00000158406	458.007	66.1849	204.024	42.1531	24.7077
645102	TRAPPC3L	6	116859344	116868350	637.356	166	0	1	1	1	1	1	1	ENSG00000173626	0.016123	0.00170918	0.220214	0.00368211	0.00240977
85578	RP11-77G23.2	10	76784440	76785161	636.333	167	0	0	1	1	1	1	0	#N/A	#N/A	#N/A	#N/A	#N/A	#N/A
103057	STIM1	11	3872404	3879208	634.35	168	0	1	1	1	1	1	1	ENSG00000167323	15.1645	13.3345	68.1338	25.2049	41.7723
103057	MIR4687	11	3872404	3879208	634.35	168	0	1	1	1	1	1	1	ENSG00000263421	4.26776e-05	4.95764e-05	4.5278e-05	4.52635e-05	0.000153936
103057	AC090587.4	11	3872404	3879208	634.35	168	0	1	1	1	1	1	1	#N/A	#N/A	#N/A	#N/A	#N/A	#N/A
103057	AC090587.5	11	3872404	3879208	634.35	168	0	1	1	1	1	1	1	#N/A	#N/A	#N/A	#N/A	#N/A	#N/A
359137	AC021188.4	2	96986565	96990459	634.179	169	0	1	1	1	1	1	1	#N/A	#N/A	#N/A	#N/A	#N/A	#N/A
229121	STON2	14	81901484	81902953	629.148	170	0	0	1	1	1	0	0	ENSG00000140022	32.115	1.16986	156.547	0.0736903	0.203945
576255	CCNB1	5	68471391	68473549	629.084	171	0	0	1	1	1	0	1	ENSG00000134057	83.912	4.09672	54.8099	0.665035	0.449294
576255	snoU13	5	68471391	68473549	629.084	171	0	1	1	1	1	0	1	#N/A	#N/A	#N/A	#N/A	#N/A	#N/A
14164	FGGY	1	59758286	59764653	628.767	172	0	1	1	1	1	1	1	ENSG00000172456	1.83305	5.19975	1.8878	5.59762	21.0274
733942	DECR1	8	91010880	91017240	624.679	173	0	1	1	1	1	1	1	ENSG00000104325	42.6332	63.5052	40.5254	24.6722	98.8481
733942	NBN	8	91010880	91017240	624.679	173	0	1	1	1	1	1	1	ENSG00000104320	14.5809	36.3225	16.4449	13.484	139.144
157379	AAAS	12	53718188	53721565	624.621	174	0	0	1	1	1	0	0	ENSG00000094914	17.9155	11.6495	11.3725	11.2314	5.62743
618286	HIST1H3C	6	26034592	26050868	622.125	175	0	1	1	1	1	1	1	ENSG00000196532	857.674	2.1621	259.971	2.73845	1.8322
618286	HIST1H2BB	6	26034592	26050868	622.125	175	0	1	1	1	1	1	1	ENSG00000196226	421.072	3.33415	161.491	4.60881	1.28537
618286	U91328.2	6	26034592	26050868	622.125	175	0	1	1	1	1	1	1	#N/A	#N/A	#N/A	#N/A	#N/A	#N/A
58614	RP5-1061H20.5	1	229363280	229363819	621.718	176	0	1	1	1	1	1	1	#N/A	#N/A	#N/A	#N/A	#N/A	#N/A
770867	HNRNPK	9	86594077	86596433	621.55	177	0	1	1	1	1	1	1	ENSG00000165119	240.506	224.654	259.756	253.004	578.278
770867	RMI1	9	86594077	86596433	621.55	177	0	1	1	1	1	1	1	ENSG00000178966	6.55186	1.57072	3.75034	0.608199	6.56103
289015	HOXB8	17	46692325	46693111	621.229	178	0	0	1	1	1	0	0	ENSG00000120068	0.0146434	0.0034903	0.00336728	0.00329511	0.0121653
497878	BLOC1S4	4	6711924	6729628	619.968	179	0	0	1	0	0	1	1	ENSG00000186222	2.67172	4.74277	4.15722	6.71172	3.6769
529672	GAR1	4	110736003	110739019	619.239	180	0	0	1	1	1	1	0	ENSG00000109534	7.71567	2.29501	3.76945	2.57948	0.875908
529672	RP11-602N24.3	4	110736003	110739019	619.239	180	0	0	1	1	1	1	0	#N/A	#N/A	#N/A	#N/A	#N/A	#N/A
363330	BCL2L11	2	111872736	111883621	618.91	181	0	0	1	1	1	0	1	ENSG00000153094	20.3245	3.10714	18.4384	5.42332	37.769
363330	AC096670.3	2	111872736	111883621	618.91	181	0	0	1	1	1	0	1	#N/A	#N/A	#N/A	#N/A	#N/A	#N/A
576256	CENPH	5	68473550	68485984	616.675	182	0	0	1	0	1	1	1	ENSG00000153044	20.1144	2.86671	9.85281	3.29897	0.375312
136484	BUD13	11	116640801	116647666	616.648	183	0	0	1	0	1	1	1	ENSG00000137656	5.503	4.66763	3.67256	4.07328	6.99702
136484	AP006216.10	11	116640801	116647666	616.648	183	0	0	1	0	1	1	1	#N/A	#N/A	#N/A	#N/A	#N/A	#N/A
136484	AP006216.11	11	116640801	116647666	616.648	183	0	0	1	0	1	1	1	#N/A	#N/A	#N/A	#N/A	#N/A	#N/A
35709	TUFT1	1	151512436	151516083	615.916	184	0	0	1	1	1	0	0	ENSG00000143367	5.58813	0.952152	0.681724	0.519598	4.77332
35709	RP11-74C1.4	1	151512436	151516083	615.916	184	0	0	1	1	1	0	0	#N/A	#N/A	#N/A	#N/A	#N/A	#N/A
781545	CNTRL	9	123834159	123838205	615.671	185	0	1	1	1	1	1	1	ENSG00000119397	8.62499	7.52566	11.2468	38.9842	15.2632
618313	HIST1H4D	6	26187322	26196678	613.287	186	0	0	1	1	0	1	1	ENSG00000188987	1091.94	37.7502	308.362	35.4683	9.64279
618313	HIST1H1PS1	6	26187322	26196678	613.287	186	0	0	1	1	0	1	1	ENSG00000216331	0.246156	0.000309965	0.00437638	0.000471535	0.00151616
227304	NEK9	14	75592888	75594848	612.45	187	0	1	1	1	1	1	1	ENSG00000119638	13.274	9.59366	13.3505	15.9041	10.7364
227304	RP11-950C14.7	14	75592888	75594848	612.45	187	0	1	1	1	1	1	1	#N/A	#N/A	#N/A	#N/A	#N/A	#N/A
119486	MIR130A	11	57408121	57411419	611.992	188	0	1	1	1	1	1	1	ENSG00000208009	2.48499e-05	4.07321e-05	3.23761e-05	3.42598e-05	0.000132495
604556	C5orf54	5	159822091	159829658	610.61	189	0	0	1	1	1	0	1	ENSG00000221886	0.588566	0.493348	1.55602	0.0688528	0.0838581
743447	DEPTOR	8	120884612	120887475	608.521	190	0	0	1	1	1	1	0	ENSG00000155792	0.613417	0.150134	0.223322	0.605145	0.00269763
743447	KB-1471A8.1	8	120884612	120887475	608.521	190	0	0	1	1	1	1	0	#N/A	#N/A	#N/A	#N/A	#N/A	#N/A
688041	CDK6	7	92460612	92467461	608.173	191	0	0	1	1	1	1	0	ENSG00000105810	18.8257	2.99849	14.0284	19.8449	1.60897
688041	AC002454.1	7	92460612	92467461	608.173	191	0	0	1	1	1	1	0	#N/A	#N/A	#N/A	#N/A	#N/A	#N/A
262394	FOPNL	16	15980084	15987977	607.384	192	0	0	1	1	1	0	0	ENSG00000133393	34.4348	13.7603	28.4789	9.56333	4.23363
377375	NR4A2	2	157197937	157201343	606.408	193	0	1	1	1	1	1	1	ENSG00000153234	5.9599	0.41308	4.66944	5.58768	7.64385
654954	STXBP5	6	147521692	147526124	605.851	194	0	0	1	0	1	0	0	ENSG00000164506	22.3583	7.66533	158.787	14.5594	88.9731
654954	STXBP5-AS1	6	147521692	147526124	605.851	194	0	0	1	0	1	0	0	ENSG00000233452	0.310295	0.447976	3.00662	0.715787	2.33813
683131	PTPN12	7	77161674	77168472	603.542	195	0	1	1	1	1	1	1	ENSG00000127947	11.4426	22.3948	58.938	3.01033	144.201
393604	FZD5	2	208630833	208640808	601.797	196	0	0	1	1	1	0	0	ENSG00000163251	6.12748	1.0013	0.757492	0.0168173	0.460777
258646	SNRPA1	15	101833589	101835950	601.643	197	0	0	1	1	1	0	1	ENSG00000131876	21.6731	19.002	19.8905	33.2359	4.83501
258646	RP11-299G20.2	15	101833589	101835950	601.643	197	0	0	1	1	1	0	1	#N/A	#N/A	#N/A	#N/A	#N/A	#N/A
170220	NUDT4	12	93767445	93774109	601.442	198	0	0	1	1	1	1	0	ENSG00000173598	464.775	12.8297	33.6639	18.0306	11.0635
170220	RP11-486A14.2	12	93767445	93774109	601.442	198	0	0	1	1	1	1	0	#N/A	#N/A	#N/A	#N/A	#N/A	#N/A
497885	KIAA0232	4	6773429	6783732	601.15	199	0	0	1	0	1	1	1	ENSG00000170871	14.4629	10.0699	13.4581	4.37819	77.2291
359124	CIAO1	2	96930538	96932897	600.247	200	0	0	1	1	1	1	0	ENSG00000144021	13.4188	30.9937	14.0594	16.9908	27.9245
359124	TMEM127	2	96930538	96932897	600.247	200	0	0	1	1	1	1	0	ENSG00000135956	5.49954	30.3899	8.94541	4.56704	104.203
744956	MTSS1	8	125730521	125744854	599.844	201	0	0	1	0	1	0	0	ENSG00000170873	18.9949	3.06028	61.1682	3.29999	0.224487
140327	ADAMTS8	11	130296757	130307018	594.233	202	0	0	1	1	1	1	0	ENSG00000134917	2.70126e-05	0.00105064	2.23182e-05	2.74378e-05	0.000100201
626953	ZNF451	6	56950819	56958953	594.217	203	0	0	1	0	1	1	0	ENSG00000112200	48.2181	15.0093	35.8341	35.5166	16.7265
400912	NCL	2	232322127	232328427	594.063	204	0	0	1	0	1	0	0	ENSG00000115053	110.758	79.9074	107.21	129.439	23.4753
400912	SNORD82	2	232322127	232328427	594.063	204	0	0	1	0	1	0	0	ENSG00000202400	5.64099e-05	6.40164e-05	7.13295e-05	6.50678e-05	0.000192844
22279	SSX2IP	1	85154753	85156616	593.411	205	0	0	1	0	1	1	0	ENSG00000117155	28.2623	2.29127	38.1486	2.58102	0.97537
618283	HIST1H4B	6	26026145	26031512	591.289	206	0	0	1	0	0	0	1	ENSG00000124529	620.772	30.2052	244.945	57.0127	27.2553
34295	PEX11B	1	145520504	145527491	590.631	207	0	0	1	0	1	0	1	ENSG00000131779	4.46844	7.18396	6.29211	6.45084	4.58342
34295	ITGA10	1	145520504	145527491	590.631	207	0	0	1	0	1	0	1	ENSG00000143127	0.116765	0.049199	0.231574	0.421986	0.092407
490869	PIK3CA	3	178863488	178867393	588.894	208	0	0	1	0	1	1	0	ENSG00000121879	17.8998	12.3988	8.76278	19.3512	40.494
490869	RP11-360P21.2	3	178863488	178867393	588.894	208	0	0	1	0	1	1	0	#N/A	#N/A	#N/A	#N/A	#N/A	#N/A
651189	MYB	6	135513571	135520533	587.673	209	0	0	1	0	0	0	0	ENSG00000118513	22.7791	0.212099	3.37214	6.26187	3.47567
651189	MYB-AS1	6	135513571	135520533	587.673	209	1	0	1	0	0	0	0	ENSG00000236703	1.0453e-06	1.21866e-06	1.14058e-06	1.70967e-06	5.78227e-06
633542	LCA5	6	80244324	80248105	586.569	210	0	0	1	0	1	0	0	ENSG00000135338	2.09319	0.0341011	8.29622	0.141949	0.00248268
52074	C4BPA	1	207275723	207277802	586.46	211	0	1	1	1	1	1	1	ENSG00000123838	0.00048035	0.00183318	0.000570919	0.000637934	2.92691
142867	CCND2	12	4380818	4386594	585.934	212	0	1	1	1	1	1	1	ENSG00000118971	19.9539	17.1051	22.0903	24.7014	4.8393
142867	CCND2-AS1	12	4380818	4386594	585.934	212	0	1	1	1	1	1	1	ENSG00000256164	0.0001063	0.000350718	0.123867	0.101569	4.59513e-06
142867	CCND2-AS2	12	4380818	4386594	585.934	212	0	1	1	1	1	1	1	ENSG00000255920	1.30552e-06	2.11104e-05	0.000894753	0.00031568	5.36615e-06
357345	MAT2A	2	85765298	85769112	585.025	213	0	0	1	1	1	0	0	ENSG00000168906	131.787	49.3288	70.343	34.9266	22.7937
286149	SLFN12L	17	33861853	33864995	584.988	214	0	1	1	1	1	1	1	ENSG00000205045	0.611474	0.146236	0.0961525	35.6136	0.381386
35741	CELF3	1	151687246	151690164	584.098	215	0	0	1	1	1	0	0	ENSG00000159409	0.319099	0.0049059	0.00769429	0.00476701	0.0209546
136490	ZNF259	11	116657530	116663529	582.43	216	0	0	1	0	1	1	1	ENSG00000109917	10.6165	12.0757	9.52259	17.0366	7.60686
136490	APOA5	11	116657530	116663529	582.43	216	0	0	1	0	1	1	1	ENSG00000110243	0.00144391	0.000447291	0.000397497	0.000446982	0.00163211
78339	RMRPP4	10	52342290	52353880	582.151	217	0	0	1	1	0	0	0	ENSG00000251950	0.301467	0.000395094	0.0105908	0.000181813	0.00466636
78339	RNU7-107P	10	52342290	52353880	582.151	217	0	0	1	1	0	0	0	ENSG00000238523	5.77261e-05	8.35417e-05	6.47586e-05	8.33059e-05	0.000284351
241416	SRP14	15	40329868	40338300	581.877	218	0	0	1	1	1	1	0	ENSG00000140319	71.7712	111.905	74.267	57.7473	100.924
241416	SRP14-AS1	15	40329868	40338300	581.877	218	0	0	1	1	1	1	0	ENSG00000248508	0.57871	1.30994	1.24274	2.48964	0.212801
429851	PEX26	22	18559635	18572892	580.399	219	0	0	1	0	1	0	0	ENSG00000215193	6.34434	8.57522	8.09066	7.78575	2.04663
429851	XXbac-B476C20.11	22	18559635	18572892	580.399	219	0	0	1	0	1	0	0	#N/A	#N/A	#N/A	#N/A	#N/A	#N/A
429851	XXbac-B476C20.9	22	18559635	18572892	580.399	219	0	0	1	0	1	0	0	#N/A	#N/A	#N/A	#N/A	#N/A	#N/A
519441	snoU13	4	79555295	79565033	580.333	220	0	1	1	1	1	0	1	#N/A	#N/A	#N/A	#N/A	#N/A	#N/A
580667	VCAN-AS1	5	82874840	82878202	577.369	221	0	0	1	1	1	0	0	ENSG00000249835	0.00270674	0.00303882	0.00021348	0.000269609	0.00085165
40136	MPZL1	1	167690219	167692255	576.05	222	0	0	1	0	0	0	1	ENSG00000197965	14.4533	27.074	4.16278	2.68274	139.164
171861	APAF1	12	99035902	99040250	575.857	223	0	1	1	1	1	1	1	ENSG00000120868	7.53768	12.4044	8.14923	6.35755	117.111
171861	IKBIP	12	99035902	99040250	575.857	223	0	1	1	1	1	1	1	ENSG00000166130	5.31886	11.4323	5.72304	1.64552	67.8731
36360	RPS27	1	153956792	153974010	575.641	224	0	1	1	1	1	1	1	ENSG00000177954	1591.65	1274.39	1398.45	8962.47	186.74
36360	RAB13	1	153956792	153974010	575.641	224	0	1	1	1	1	1	1	ENSG00000143545	9.6263	16.7854	17.9777	0.0532622	0.439458
36360	RP11-422P24.9	1	153956792	153974010	575.641	224	0	1	1	1	1	1	1	#N/A	#N/A	#N/A	#N/A	#N/A	#N/A
36360	U3	1	153956792	153974010	575.641	224	0	1	1	1	1	1	1	#N/A	#N/A	#N/A	#N/A	#N/A	#N/A
119458	SLC43A1	11	57280663	57286440	575.383	225	0	0	1	0	0	0	1	ENSG00000149150	38.0767	0.675128	4.6006	2.6902	0.21604
353767	STAMBP	2	74055227	74060673	574.279	226	0	1	1	1	1	1	1	ENSG00000124356	9.67624	11.6477	16.0727	8.96681	25.0498
516946	DCK	4	71857527	71859000	573.594	227	0	0	1	1	1	0	0	ENSG00000156136	25.679	10.5391	16.9698	18.5598	5.16128
432939	TIMP3	22	33190122	33206919	571.543	228	0	0	1	1	1	0	0	ENSG00000100234	15.4461	0.323789	85.6298	0.000990013	2.02342e-06
218155	KLHL28	14	45426838	45432025	570.169	229	0	1	1	1	1	1	1	ENSG00000179454	4.07371	6.6445	4.49698	13.2615	23.4376
218155	FAM179B	14	45426838	45432025	570.169	229	0	1	1	1	1	1	1	ENSG00000198718	3.8533	4.03309	3.71477	6.23495	2.59125
723098	LYN	8	56780974	56794019	569.413	230	0	0	1	1	1	0	1	ENSG00000254087	15.2101	47.4414	42.0733	0.267543	811.54
547547	MSMO1	4	166247377	166249653	568.331	231	0	1	1	1	1	1	1	ENSG00000052802	24.3859	25.2452	43.0677	4.02293	1.67303
93869	SLK	10	105723734	105729377	568.232	232	0	0	1	0	1	1	0	ENSG00000065613	16.4652	14.3244	13.9913	13.9033	70.53
655641	PPIL4	6	149834768	149840193	567.998	233	0	1	1	1	1	1	1	ENSG00000131013	10.6007	10.5273	9.07161	15.177	16.9074
655641	RNU7-3P	6	149834768	149840193	567.998	233	0	1	1	1	1	1	1	ENSG00000252244	5.30675e-05	8.18525e-05	6.36009e-05	6.28921e-05	0.000321833
103033	RNU7-50P	11	3801280	3803196	567.475	234	0	1	1	1	1	1	1	ENSG00000238304	4.08352e-05	7.67867e-05	8.88297e-05	6.58623e-05	0.000267782
329390	ZNF225	19	44616755	44621565	567.008	235	0	0	1	1	0	0	0	ENSG00000256294	1.72895	1.55945	1.99838	1.47728	0.74379
329390	AC084219.4	19	44616755	44621565	567.008	235	0	0	1	1	0	0	0	#N/A	#N/A	#N/A	#N/A	#N/A	#N/A
354129	TACR1	2	75426286	75427250	566.954	236	0	0	1	0	1	0	0	ENSG00000115353	0.000505612	0.000849671	0.000618632	0.00175504	0.00239736
266104	ARMC5	16	31466454	31469797	566.163	237	0	1	1	1	1	1	1	ENSG00000140691	1.83311	1.50363	3.28115	1.04816	1.09617
501057	NCAPG	4	17810109	17813638	565.049	238	0	1	1	1	1	1	1	ENSG00000109805	32.4271	0.742378	17.6894	0.106618	0.238326
501057	DCAF16	4	17810109	17813638	565.049	238	0	1	1	1	1	1	1	ENSG00000163257	14.1503	4.89103	13.528	22.3102	8.93579
119488	YPEL4	11	57413535	57427540	564.218	239	0	0	1	0	1	1	1	ENSG00000166793	29.437	3.62931	0.271148	0.328499	0.0495817
119488	CLP1	11	57413535	57427540	564.218	239	0	0	1	0	1	1	1	ENSG00000172409	7.98308	8.18731	5.07734	5.04884	21.1454
119488	AP000662.4	11	57413535	57427540	564.218	239	0	0	1	0	1	1	1	#N/A	#N/A	#N/A	#N/A	#N/A	#N/A
480398	RNU6-428P	3	146288053	146292128	563.911	240	0	1	1	1	1	1	1	ENSG00000199812	2.37838e-05	3.01052e-05	2.78986e-05	2.82616e-05	9.78322e-05
34279	TXNIP	1	145427517	145441089	563.149	241	0	0	1	0	1	1	1	ENSG00000117289	76.9629	140.861	80.2711	879.796	1976.73
333928	RNF144A	2	7056902	7059307	561.301	242	0	0	1	0	0	1	0	ENSG00000151692	12.6915	0.398251	4.30118	12.6012	5.89175
333928	RNF144A-AS1	2	7056902	7059307	561.301	242	0	0	1	0	0	1	0	ENSG00000228203	2.04527	0.120477	1.87309	0.58995	1.73688
626909	RNU6-626P	6	56807969	56811198	561.124	243	1	0	1	0	0	0	0	ENSG00000200224	1.83918e-05	2.85913e-05	2.34013e-05	3.2246e-05	8.73341e-05
158130	SMARCC2	12	56581323	56586730	560.576	244	0	0	1	0	1	1	0	ENSG00000139613	25.4258	12.7825	20.0064	23.7371	43.7569
158130	RP11-977G19.5	12	56581323	56586730	560.576	244	0	0	1	0	1	1	0	#N/A	#N/A	#N/A	#N/A	#N/A	#N/A
683175	RSBN1L	7	77325125	77327287	560.269	245	0	1	1	1	1	1	1	ENSG00000187257	9.4338	6.31656	8.94827	14.3986	64.102
683175	RSBN1L-AS1	7	77325125	77327287	560.269	245	0	1	1	1	1	1	1	ENSG00000214293	2.33013	1.40654	2.78007	1.9609	10.4474
572215	MAP3K1	5	56108371	56117353	559.436	246	0	1	1	1	1	1	1	ENSG00000095015	7.17433	15.3302	4.47576	36.711	111.458
631572	KCNQ5-AS1	6	73852950	73854769	559.234	247	0	0	1	1	1	1	0	ENSG00000229154	5.0629e-07	7.68558e-07	2.97375e-07	4.7764e-07	1.36169e-06
445289	EOMES	3	27762062	27764795	558.57	248	0	0	1	1	1	1	0	ENSG00000163508	0.000582148	0.00548819	0.00139549	0.453025	0.00742936
49626	C1orf53	1	197874612	197883295	558.329	249	0	0	1	1	1	0	0	ENSG00000203724	0.320547	0.683557	0.112621	0.00875707	0.00544618
49626	LHX9	1	197874612	197883295	558.329	249	0	0	1	1	1	0	0	ENSG00000143355	0.0112071	0.00427828	0.00579106	0.00461547	0.0167247
289011	HOXB3	17	46681704	46682818	557.397	250	0	0	1	0	1	0	0	ENSG00000120093	1.27295	0.0261368	1.34026	0.644999	0.0600476
289011	HOXB6	17	46681704	46682818	557.397	250	0	0	1	0	1	0	0	ENSG00000108511	0.0117089	0.00721542	0.085025	0.00362119	0.00627366
759237	IFNK	9	27523764	27525591	557.189	251	0	0	1	1	1	0	1	ENSG00000147896	5.3297e-05	7.90264e-07	3.59205e-07	3.97953e-07	2.9925e-05
772460	GADD45G	9	92217015	92221435	556.521	252	0	1	1	1	1	1	1	ENSG00000130222	2.66178	2.58734	0.853076	0.0288422	6.11234
136573	PAFAH1B2	11	117014364	117016742	555.782	253	0	0	1	0	1	1	1	ENSG00000168092	23.0229	30.7557	25.2586	18.3791	88.6689
136573	RP11-109L13.5	11	117014364	117016742	555.782	253	0	0	1	0	1	1	1	#N/A	#N/A	#N/A	#N/A	#N/A	#N/A
393693	snoU13	2	208938686	208939088	555.521	254	0	1	1	0	1	0	0	#N/A	#N/A	#N/A	#N/A	#N/A	#N/A
357572	CHMP3	2	86738402	86749580	551.398	255	0	1	1	1	1	1	1	ENSG00000115561	19.4808	35.0394	22.2491	31.184	141.732
357572	RNU6-640P	2	86738402	86749580	551.398	255	0	1	1	1	1	1	1	ENSG00000200563	2.16121e-05	2.909e-05	2.22069e-05	2.37641e-05	0.000390944
223112	RP11-1042B17.5	14	61106403	61107550	550.55	256	0	0	1	1	1	0	0	#N/A	#N/A	#N/A	#N/A	#N/A	#N/A
584689	ELL2	5	95295169	95298801	550.02	257	0	0	1	1	1	0	0	ENSG00000118985	33.2395	14.4841	3.33384	2.59595	16.48
584689	CTD-2337A12.1	5	95295169	95298801	550.02	257	0	0	1	1	1	0	0	#N/A	#N/A	#N/A	#N/A	#N/A	#N/A
76673	MARCH8	10	46088525	46093353	548.979	258	0	0	1	0	1	1	1	ENSG00000165406	38.8792	5.05907	10.1724	14.4858	78.9932
495428	HES1	3	193850191	193857559	547.674	259	0	0	1	1	1	0	0	ENSG00000114315	1.97779	0.0127892	1.45721	0.00457479	0.235562
289019	HOXB9	17	46701021	46706541	547.067	260	0	0	1	1	1	0	0	ENSG00000170689	0.287044	4.89412e-05	0.000173009	5.45952e-05	0.000170189
289019	HOXB-AS4	17	46701021	46706541	547.067	260	0	0	1	1	1	0	0	ENSG00000242207	0.000315726	0.000395808	0.00036407	0.000422279	0.00147079
528082	TET2	4	106064152	106068261	546.911	261	0	1	1	1	1	1	1	ENSG00000168769	9.33652	14.9047	26.6135	6.06575	245.536
22233	CTBS	1	85038838	85042009	545.709	262	0	0	1	1	1	0	1	ENSG00000117151	2.98878	14.1815	6.24689	6.94493	143.724
177194	TAOK3	12	118799031	118811404	541.524	263	0	0	1	1	1	0	1	ENSG00000135090	25.0924	45.4683	59.1198	27.9166	102.86
120653	BEST1	11	61711928	61729238	541.349	264	0	0	1	0	1	0	1	ENSG00000167995	5.36292	7.7672	0.286191	0.022373	107.788
331315	BRSK1	19	55794659	55803086	541.154	265	0	0	1	1	1	1	0	ENSG00000160469	0.100877	0.0213147	1.23429	0.344862	0.0324055
345866	FBXO11	2	48130849	48134742	540.59	266	0	1	1	1	1	1	1	ENSG00000138081	19.3103	14.6032	23.2503	24.2542	82.4275
345866	AC079807.2	2	48130849	48134742	540.59	266	0	1	1	1	1	1	1	#N/A	#N/A	#N/A	#N/A	#N/A	#N/A
103020	RNU6-1143P	11	3735379	3737395	539.926	267	1	0	1	0	0	0	0	ENSG00000251934	2.19475e-05	3.26077e-05	2.64905e-05	2.95124e-05	0.000103671
5840	PIGV	1	27112453	27115733	538.754	268	0	1	1	1	1	1	1	ENSG00000060642	3.84569	3.67083	2.28411	2.16119	8.77135
625748	RP1-27K12.4	6	53367010	53369768	535.501	269	0	0	1	1	1	0	1	#N/A	#N/A	#N/A	#N/A	#N/A	#N/A
143494	GAPDH	12	6641136	6645372	535.181	270	0	0	1	0	1	1	0	ENSG00000111640	678.988	875.56	1372.56	151.224	458.177
143494	RP5-940J5.3	12	6641136	6645372	535.181	270	0	0	1	0	1	1	0	#N/A	#N/A	#N/A	#N/A	#N/A	#N/A
10285	TESK2	1	45955111	45957467	534.687	271	0	0	1	1	1	1	0	ENSG00000070759	4.44929	2.86016	4.47621	1.99397	19.0618
648103	HEY2	6	126066736	126072244	530.896	272	0	0	1	0	1	1	0	ENSG00000135547	0.274847	9.21226e-05	0.00125438	0.0160538	0.00105911
648103	RP11-624M8.1	6	126066736	126072244	530.896	272	0	0	1	0	1	1	0	#N/A	#N/A	#N/A	#N/A	#N/A	#N/A
30213	GPR61	1	110083451	110088718	530.07	273	0	0	1	1	1	1	0	ENSG00000156097	0.0388638	0.0156512	0.00914983	0.126057	0.0471481
30213	RP5-1160K1.8	1	110083451	110088718	530.07	273	0	0	1	1	1	1	0	#N/A	#N/A	#N/A	#N/A	#N/A	#N/A
619766	LY6G6F	6	31672196	31677679	529.913	274	0	1	1	1	1	1	1	ENSG00000204424	3.36627	0.00112223	89.3946	0.000762746	0.00252114
619766	MEGT1	6	31672196	31677679	529.913	274	0	1	1	1	1	1	1	#N/A	#N/A	#N/A	#N/A	#N/A	#N/A
442762	KAT2B	3	20079317	20085050	529.081	275	0	0	1	0	1	1	1	ENSG00000114166	23.0493	7.25637	10.4367	17.843	40.5798
618325	HIST1H1D	6	26234914	26237080	529.079	276	1	0	1	0	0	0	0	ENSG00000124575	940.62	24.0901	381.575	192.403	5.04757
493342	BCL6	3	187460429	187464148	527.195	277	0	0	1	1	1	1	0	ENSG00000113916	12.657	35.1029	0.234941	2.38921	724.626
493342	RP11-211G3.2	3	187460429	187464148	527.195	277	0	0	1	1	1	1	0	#N/A	#N/A	#N/A	#N/A	#N/A	#N/A
126778	C11orf73	11	86009291	86014043	525.552	278	0	1	1	1	1	1	1	ENSG00000149196	17.9686	13.1109	18.5091	11.4929	2.98679
745019	ZNF572	8	125983363	125987595	525.352	279	0	0	1	0	1	0	0	ENSG00000180938	0.50591	0.29139	1.22032	0.652413	4.83777e-05
396582	IGFBP5	2	217552337	217560726	524.471	280	0	0	1	1	1	1	0	ENSG00000115461	0.746965	0.000516305	4.13945	0.00114607	0.0015682
396582	AC007563.5	2	217552337	217560726	524.471	280	0	0	1	1	1	1	0	#N/A	#N/A	#N/A	#N/A	#N/A	#N/A
395443	IKZF2	2	214011340	214018497	524.298	281	0	0	1	1	1	0	0	ENSG00000030419	0.65895	0.953025	0.223007	4.00546	0.177348
395443	RP11-105N14.1	2	214011340	214018497	524.298	281	0	0	1	1	1	0	0	#N/A	#N/A	#N/A	#N/A	#N/A	#N/A
618823	HIST1H2BO	6	27861035	27864923	521.77	282	0	0	1	1	1	1	0	ENSG00000196331	489.355	6.83276	204.135	7.07627	7.03871
622696	VEGFA	6	43731585	43743257	521.617	283	0	0	1	0	1	0	0	ENSG00000112715	52.2029	9.74226	51.5217	0.122483	8.41903
622696	RP1-261G23.7	6	43731585	43743257	521.617	283	0	0	1	0	1	0	0	#N/A	#N/A	#N/A	#N/A	#N/A	#N/A
221748	TMEM260	14	56951756	56956828	521.432	284	0	0	1	1	1	1	0	ENSG00000070269	7.29121	5.30241	6.14112	8.81378	34.5625
126741	RNU6-560P	11	85863369	85870921	521.401	285	0	0	1	1	0	0	1	ENSG00000200877	1.88781e-05	2.53964e-05	2.22922e-05	2.70835e-05	0.000106506
624584	RP11-719J20.1	6	49782196	49793228	520.567	286	0	0	1	0	1	0	0	#N/A	#N/A	#N/A	#N/A	#N/A	#N/A
624584	RP3-417L20.4	6	49782196	49793228	520.567	286	0	0	1	0	1	0	0	#N/A	#N/A	#N/A	#N/A	#N/A	#N/A
676389		7	50411807	50412756	517.73	287	0	1	1	1	1	1	1	#N/A	#N/A	#N/A	#N/A	#N/A	#N/A
180690	ZNF268	12	133706248	133713251	517.148	288	0	0	1	1	1	1	0	ENSG00000090612	4.76001	5.55531	6.63587	9.02403	2.63487
180690	ZNF10	12	133706248	133713251	517.148	288	0	0	1	1	1	1	0	ENSG00000256223	1.91236	0.730531	2.69538	4.8477	0.811066
180690	ZNF891	12	133706248	133713251	517.148	288	0	0	1	1	1	1	0	ENSG00000214029	1.15909	0.509731	1.35089	4.51618	0.471026
180690	CTD-2140B24.4	12	133706248	133713251	517.148	288	0	0	1	1	1	1	0	ENSG00000256825	7.86199e-07	2.41872e-06	1.5835e-06	1.14398e-06	6.81509e-06
598043	HSPA9	5	137891683	137901372	517.114	289	0	0	1	0	0	0	0	ENSG00000113013	101.106	111.678	71.3022	63.9462	29.0252
598043	SNORD63	5	137891683	137901372	517.114	289	1	0	1	0	0	0	0	ENSG00000206989	6.55819e-05	7.47979e-05	4.74598e-05	0.000206717	0.000227148
119413	snoU13	11	57095578	57097518	516.678	290	0	1	1	1	0	1	1	#N/A	#N/A	#N/A	#N/A	#N/A	#N/A
103013	snoU13	11	3706562	3715014	515.022	291	0	1	1	0	1	0	1	#N/A	#N/A	#N/A	#N/A	#N/A	#N/A
631417	KCNQ5	6	73330748	73337110	514.777	292	0	0	1	1	1	0	0	ENSG00000185760	0.882099	0.177248	0.44648	1.52248	0.0915774
298716	DLGAP1-AS1	18	3589222	3595009	513.453	293	0	0	1	1	1	0	0	ENSG00000177337	2.53641	2.43002	1.89065	3.1362	8.05186
358076	RNU6-1007P	2	88707527	88715360	512.897	294	0	0	1	0	0	0	1	ENSG00000252395	2.54484e-05	2.55466e-05	2.37006e-05	2.78645e-05	9.75065e-05
52071	C4BPB	1	207260202	207272701	512.425	295	0	1	1	1	1	1	1	ENSG00000123843	0.0123163	0.0109353	0.0131145	0.721384	0.0533096
604542	CCNJL	5	159766712	159776138	511.589	296	0	0	1	1	1	0	1	ENSG00000135083	0.298642	0.0131836	2.36223	0.0204961	100.828
62277	CHML	1	241798766	241801985	511.587	297	0	0	1	1	1	1	0	ENSG00000203668	3.51793	3.43177	2.89789	4.63965	0.703201
408664	SNX5	20	17946510	17951709	509.85	298	0	0	1	1	1	1	0	ENSG00000089006	58.7757	64.3763	50.5761	21.2522	4.57019
408664	MGME1	20	17946510	17951709	509.85	298	0	0	1	1	1	1	0	ENSG00000125871	16.9845	8.41036	16.87	3.16768	8.76519
615228	MYLIP	6	16127617	16130346	509.143	299	0	0	1	1	1	0	0	ENSG00000007944	8.57846	5.61155	4.30295	29.097	78.1262
218210	FKBP3	14	45602375	45606281	509.043	300	0	0	1	1	0	1	1	ENSG00000100442	23.5428	17.9771	21.2872	25.1189	7.02016
218210	FANCM	14	45602375	45606281	509.043	300	0	0	1	1	0	1	1	ENSG00000187790	5.46913	1.54416	3.51526	3.51647	1.80696
37823	DUSP23	1	159749526	159753587	508.587	301	0	0	1	1	1	0	0	ENSG00000158716	4.94323	24.0078	16.1323	3.13422	11.1188
36886	RRNAD1	1	156696068	156699449	508.518	302	0	0	1	0	1	1	0	ENSG00000143303	7.7871	6.05207	10.6415	4.30749	8.71797
36886	ISG20L2	1	156696068	156699449	508.518	302	0	0	1	0	1	1	0	ENSG00000143319	7.17759	6.81863	6.26952	6.10628	32.6327
433739	MB	22	36033286	36036752	506.089	303	0	0	1	1	1	0	0	ENSG00000198125	0.0145617	0.0225994	0.015666	0.0195879	0.0720285
608025	FGF18	5	170845216	170847873	505.994	304	0	0	1	1	1	0	0	ENSG00000156427	0.0106373	3.63992e-05	6.60062e-06	0.0236226	3.76187e-06
2518	AADACL4	1	12700924	12716452	503.471	305	0	0	1	1	1	1	0	ENSG00000204518	3.18512e-07	2.80905e-07	3.94845e-07	3.67421e-07	1.15569e-06
116600	PTPRJ	11	48001307	48004168	503.104	306	0	1	1	1	1	1	1	ENSG00000149177	9.08318	24.299	35.5314	12.6174	242.14
100122	FAM53B	10	126429450	126437199	500.755	307	0	0	1	0	1	1	1	ENSG00000189319	20.356	9.08539	7.00005	8.35531	49.1693
497870	RP11-539L10.3	4	6675206	6677535	500.252	308	0	0	1	0	0	1	1	#N/A	#N/A	#N/A	#N/A	#N/A	#N/A
585081	LIX1	5	96476902	96485568	499.931	309	0	1	1	1	1	1	1	ENSG00000145721	5.06004e-05	0.00069389	0.00160994	6.95885e-05	0.000441733
404832	MCM8	20	5929472	5933156	498.443	310	0	0	1	1	1	1	0	ENSG00000125885	12.1255	1.3549	5.30629	2.66339	0.49086
404832	TRMT6	20	5929472	5933156	498.443	310	0	0	1	1	1	1	0	ENSG00000089195	4.18049	6.11827	4.8997	4.59026	0.956865
140208	PRDM10	11	129862357	129873115	496.379	311	0	0	1	1	0	0	1	ENSG00000170325	2.40807	2.2706	1.53761	2.1647	9.84774
140208	LINC00167	11	129862357	129873115	496.379	311	0	0	1	1	0	0	1	ENSG00000233220	0.189171	0.365232	0.0421562	0.235267	3.00698
183282	RNU6-70P	13	27917078	27933250	495.544	312	0	0	1	1	1	0	0	ENSG00000252247	2.38243e-05	3.6759e-05	3.28732e-05	4.0882e-05	0.0001231
52057	YOD1	1	207226202	207226352	494.737	313	0	1	1	1	1	1	1	ENSG00000180667	38.215	4.0025	24.3564	5.61075	15.5242
293056	AC015923.1	17	61491614	61491812	493.808	314	0	0	1	1	1	0	0	#N/A	#N/A	#N/A	#N/A	#N/A	#N/A
333912	CMPK2	2	7006566	7009316	493.368	315	1	0	1	0	0	0	0	ENSG00000134326	14.1858	2.48967	2.20228	1.93399	8.66828
103119	RRM1	11	4115324	4123273	493.305	316	0	0	1	1	1	1	0	ENSG00000167325	46.2506	9.01365	19.6989	10.1046	1.29015
357407	AC105053.3	2	86038814	86043064	492.45	317	0	0	1	1	1	0	0	#N/A	#N/A	#N/A	#N/A	#N/A	#N/A
598610	PCDHA2	5	140170289	140178617	492.434	318	0	0	1	1	1	0	0	ENSG00000204969	0.000554995	0.000131038	0.00123432	0.000323579	0.000504987
116542	FNBP4	11	47746740	47749768	492.399	319	0	0	1	0	1	0	0	ENSG00000109920	30.9575	22.894	25.4128	82.6938	25.7394
116542	Y_RNA	11	47746740	47749768	492.399	319	0	0	1	0	1	0	0	#N/A	#N/A	#N/A	#N/A	#N/A	#N/A
116542	snoU13	11	47746740	47749768	492.399	319	0	1	1	0	1	0	0	#N/A	#N/A	#N/A	#N/A	#N/A	#N/A
410114	THBD	20	23027371	23034119	490.924	320	0	0	1	1	1	0	1	ENSG00000178726	2.10014	0.530969	4.98542	0.00552596	37.4478
365957	PTPN4	2	120513542	120518269	490.752	321	0	0	1	0	1	1	1	ENSG00000088179	10.8929	6.9327	4.91558	34.5288	7.26999
483624	SSR3	3	156271748	156277429	489.784	322	0	0	1	1	1	1	0	ENSG00000114850	44.9461	83.6537	84.6129	19.0656	11.1541
444654	NGLY1	3	25830915	25831952	487.746	323	0	1	1	1	1	1	1	ENSG00000151092	16.4614	16.6636	19.4822	19.7756	60.0558
444654	OXSM	3	25830915	25831952	487.746	323	0	1	1	1	1	1	1	ENSG00000151093	4.52931	3.32674	4.70267	3.00325	1.40527
76640	RP11-67C2.2	10	45940413	45948804	487.399	324	0	0	1	0	0	0	1	#N/A	#N/A	#N/A	#N/A	#N/A	#N/A
724621	CHD7	8	61589190	61598367	487.049	325	0	1	1	1	1	1	1	ENSG00000171316	7.8756	2.48199	7.30267	14.5773	34.2464
64664	GTPBP4	10	1033144	1035562	487.004	326	0	0	1	1	1	0	1	ENSG00000107937	17.5169	14.506	16.6265	12.9494	1.81667
64664	AL359878.1	10	1033144	1035562	487.004	326	0	0	1	1	1	0	1	#N/A	#N/A	#N/A	#N/A	#N/A	#N/A
65240		10	3268256	3285527	486.707	327	0	1	1	1	1	1	0	#N/A	#N/A	#N/A	#N/A	#N/A	#N/A
95893	MXI1	10	111965601	111972285	486.477	328	0	0	1	0	0	1	1	ENSG00000119950	59.3468	16.6862	8.78445	20.3574	37.3813
95893	RP11-549L6.3	10	111965601	111972285	486.477	328	0	0	1	0	0	1	1	#N/A	#N/A	#N/A	#N/A	#N/A	#N/A
596239	AC034228.3	5	131338044	131341756	486.175	329	0	0	1	1	1	1	0	#N/A	#N/A	#N/A	#N/A	#N/A	#N/A
624559	CRISP3	6	49708145	49713404	484.174	330	1	0	1	0	0	0	0	ENSG00000096006	0.0859331	0.00337122	0.00253029	0.00423463	3.6604
135046	C11orf1	11	111750672	111753064	483.16	331	1	0	1	0	0	0	0	ENSG00000137720	4.65264	8.16746	6.62133	13.4228	0.118421
135046	FDXACB1	11	111750672	111753064	483.16	331	1	0	1	0	0	0	0	ENSG00000255561	1.02303	1.91379	0.637845	1.63813	0.134647
539232	NDUFC1	4	140222224	140223551	483.069	332	0	0	1	0	1	1	0	ENSG00000109390	34.9151	30.8209	36.8545	25.8747	8.69043
539232	NAA15	4	140222224	140223551	483.069	332	0	0	1	0	1	1	0	ENSG00000164134	18.3257	15.6693	14.5684	20.676	0.666924
723103	SNORA1	8	56812601	56820710	480.814	333	0	0	1	1	1	0	1	ENSG00000206834	#N/A	#N/A	#N/A	#N/A	#N/A
158115	RP11-603J24.6	12	56513471	56516470	480.665	334	0	0	1	0	1	1	0	#N/A	#N/A	#N/A	#N/A	#N/A	#N/A
143499	IFFO1	12	6658619	6666581	480.167	335	0	0	1	0	0	1	0	ENSG00000010295	2.89089	7.6463	4.1622	5.36769	10.2945
14015	JUN	1	59245185	59253039	480.166	336	0	1	1	1	1	1	1	ENSG00000177606	18.0765	45.6989	3.52024	26.8872	9.08917
14015	LINC01135	1	59245185	59253039	480.166	336	0	1	1	1	1	1	1	ENSG00000234807	0.0128799	0.24441	0.000328246	0.121598	0.000208172
171817	TMPO	12	98907290	98911535	479.341	337	0	0	1	1	0	1	1	ENSG00000120802	113.619	37.5265	66.4682	73.7691	0.793398
171817	TMPO-AS1	12	98907290	98911535	479.341	337	0	0	1	1	0	1	1	ENSG00000257167	2.95805	0.602204	1.31602	0.389022	0.0387286
262005	MIR193B	16	14397535	14400648	477.854	338	0	0	1	1	1	1	0	ENSG00000207639	4.48563e-05	4.95269e-05	4.61457e-05	4.23049e-05	0.000174056
93619	CYP17A1	10	104593706	104605513	477.229	339	0	0	1	0	1	0	0	ENSG00000148795	0.00421778	0.00359221	0.00417708	0.00353782	0.0260307
93619	PTGES3P4	10	104593706	104605513	477.229	339	0	0	1	0	1	0	0	ENSG00000236937	1.96335e-06	2.13415e-06	1.77903e-06	1.99756e-06	3.2485e-05
93619	PFN1P11	10	104593706	104605513	477.229	339	0	0	1	0	1	0	0	ENSG00000213061	9.13935e-07	1.95743e-05	4.70655e-05	6.71561e-06	6.40941e-06
35488	ADAMTSL4	1	150501621	150544031	476.168	340	0	0	1	0	0	0	1	ENSG00000143382	2.65166	1.79415	0.927268	0.00397173	12.8293
35488	RN7SL600P	1	150501621	150544031	476.168	340	0	0	1	0	0	0	1	ENSG00000264584	0.894332	1.16354	2.55495	1.73241	114.446
35488	ADAMTSL4-AS1	1	150501621	150544031	476.168	340	0	0	1	0	0	0	1	ENSG00000203804	0.497778	0.558765	1.0036	1.2416	122.548
35488	RN7SL473P	1	150501621	150544031	476.168	340	0	0	1	0	0	0	1	ENSG00000264508	0.414825	0.81664	1.31573	1.38493	109.949
35488	MIR4257	1	150501621	150544031	476.168	340	0	0	1	0	0	0	1	ENSG00000264553	2.71704e-05	4.0588e-05	2.87613e-05	4.19297e-05	0.000173175
35488	AL356356.1	1	150501621	150544031	476.168	340	0	0	1	0	0	0	1	#N/A	#N/A	#N/A	#N/A	#N/A	#N/A
35488	RP11-54A4.2	1	150501621	150544031	476.168	340	0	0	1	0	0	0	1	#N/A	#N/A	#N/A	#N/A	#N/A	#N/A
106272	PSMA1	11	14662258	14669644	476.103	341	0	0	1	0	0	1	1	ENSG00000129084	87.6603	116.252	103.895	69.5292	47.5124
106272	PDE3B	11	14662258	14669644	476.103	341	0	0	1	0	0	1	1	ENSG00000152270	7.97286	23.529	4.15476	73.9508	71.919
17771	PTGER3	1	71509061	71515346	476.002	342	0	0	1	0	1	0	0	ENSG00000050628	4.65727	0.0150114	11.6324	0.0292025	0.0352627
17771	ZRANB2-AS1	1	71509061	71515346	476.002	342	0	0	1	0	1	0	0	ENSG00000235079	0.0573894	0.0019964	0.0150039	0.000676639	0.00122647
619798	EHMT2	6	31851517	31855313	474.773	343	0	0	1	1	1	0	1	ENSG00000204371	5.8508	6.39987	8.74965	9.02763	1.9484
619798	EHMT2-AS1	6	31851517	31855313	474.773	343	0	0	1	1	1	0	1	ENSG00000237080	3.55215e-06	5.05554e-06	4.30712e-06	4.9018e-06	1.77157e-05
44747	RGS16	1	182567651	182590376	474.499	344	0	0	1	1	1	0	0	ENSG00000143333	2.79885	0.336564	3.80447	0.141713	0.0893676
44747	RP11-317P15.4	1	182567651	182590376	474.499	344	0	0	1	1	1	0	0	#N/A	#N/A	#N/A	#N/A	#N/A	#N/A
283349	SPECC1	17	19891668	19918010	474.049	345	0	0	1	1	1	0	0	ENSG00000128487	34.6213	27.0864	21.5966	0.863016	29.6541
283349	RP11-209D14.2	17	19891668	19918010	474.049	345	0	0	1	1	1	0	0	#N/A	#N/A	#N/A	#N/A	#N/A	#N/A
566361	CTD-2353F22.1	5	36724674	36730057	473.951	346	0	0	1	1	1	0	1	#N/A	#N/A	#N/A	#N/A	#N/A	#N/A
30764	C1orf162	1	112014292	112018606	473.76	347	0	1	1	1	1	1	1	ENSG00000143110	2.68697	62.0576	0.709392	20.9775	15.6982
218145	RP11-857B24.5	14	45375425	45383717	471.593	348	0	1	1	1	1	1	1	#N/A	#N/A	#N/A	#N/A	#N/A	#N/A
527412	BDH2	4	104020108	104023520	471.542	349	0	0	1	1	1	1	0	ENSG00000164039	2.00832	8.53327	1.56878	10.6172	0.457465
158418	INHBE	12	57841970	57847045	470.286	350	0	0	1	1	1	0	1	ENSG00000139269	0.0272184	0.00889375	0.0380306	0.00212146	0.00453555
779287	ALAD	9	116160900	116166309	469.123	351	0	0	1	0	1	0	0	ENSG00000148218	55.898	9.0137	8.07888	6.32908	4.66489
54315	CENPF	1	214775801	214777074	468.893	352	0	0	1	1	1	0	0	ENSG00000117724	44.8671	0.590378	35.3877	0.901824	0.0877136
601394	SLC26A2	5	149338010	149342289	468.782	353	1	0	1	0	0	0	0	ENSG00000155850	8.20972	3.34052	2.93493	2.63684	0.725382
211697	NOP9	14	24765344	24769127	467.176	354	0	0	1	1	0	1	1	ENSG00000196943	5.29016	7.31437	3.66937	4.49746	1.15095
211697	DHRS1	14	24765344	24769127	467.176	354	0	0	1	1	0	1	1	ENSG00000157379	2.55728	5.5469	2.87401	5.83222	10.1954
598045	HSPA9	5	137904348	137915174	466.793	355	0	0	1	0	1	0	0	ENSG00000113013	101.106	111.678	71.3022	63.9462	29.0252
134947	SIK2	11	111467855	111478001	465.911	356	0	0	1	0	1	0	0	ENSG00000170145	2.15234	3.77547	1.46924	1.91784	0.569649
477867	CEP70	3	138312712	138319219	463.893	357	0	1	1	1	1	1	1	ENSG00000114107	3.75404	7.70319	8.66158	14.4891	1.7834
35342	HIST2H2AC	1	149858435	149862569	463.478	358	0	0	1	0	1	0	0	ENSG00000184260	566.17	85.118	248.259	152.031	482.245
35342	HIST2H2AB	1	149858435	149862569	463.478	358	0	0	1	0	1	0	0	ENSG00000184270	235.056	11.3994	124.013	17.7343	52.0639
35342	BOLA1	1	149858435	149862569	463.478	358	0	0	1	0	1	0	0	ENSG00000178096	5.65307	3.44869	3.97914	3.82409	12.5827
387325	CALCRL	2	188312875	188314531	462.484	359	0	0	1	1	1	0	0	ENSG00000064989	0.649387	1.63643	0.27129	0.491601	0.183773
337608	OSR1	2	19551658	19560016	461.822	360	0	0	1	1	1	1	0	ENSG00000143867	0.00143805	0.000691284	0.000652767	0.00071886	0.00352472
278765	C17orf97	17	256417	262443	461.629	361	0	1	1	1	1	1	1	ENSG00000187624	0.0677635	0.25543	0.0841324	0.0565811	0.354245
278765	AC108004.3	17	256417	262443	461.629	361	0	1	1	1	1	1	1	#N/A	#N/A	#N/A	#N/A	#N/A	#N/A
23963	LRRC8C	1	90096958	90103624	461.332	362	0	0	1	1	1	1	0	ENSG00000171488	6.53648	3.37295	2.60726	12.5788	0.794613
23963	RP5-1007M22.2	1	90096958	90103624	461.332	362	0	0	1	1	1	1	0	#N/A	#N/A	#N/A	#N/A	#N/A	#N/A
23963	RP11-302M6.4	1	90096958	90103624	461.332	362	0	0	1	1	1	1	0	ENSG00000271949	#N/A	#N/A	#N/A	#N/A	#N/A
755912	CNTLN	9	17124033	17138027	460.776	363	0	0	1	0	1	0	0	ENSG00000044459	6.97267	3.84923	5.83696	0.0310768	1.87514
140226	APLP2	11	129936462	129941230	460.526	364	0	0	1	1	0	0	1	ENSG00000084234	75.5632	400.177	26.8681	10.7249	237.343
140226	AP003041.2	11	129936462	129941230	460.526	364	0	0	1	1	0	0	1	#N/A	#N/A	#N/A	#N/A	#N/A	#N/A
258635	CHSY1	15	101791053	101798933	459.824	365	0	0	1	1	1	0	1	ENSG00000131873	5.87143	7.81793	11.3178	3.65687	128.814
322182	ZNF433	19	12145540	12153011	459.546	366	0	0	1	0	1	0	0	ENSG00000197647	1.84579	0.357445	2.92311	0.914143	0.108404
322182	CTD-2006C1.2	19	12145540	12153011	459.546	366	0	0	1	0	1	0	0	#N/A	#N/A	#N/A	#N/A	#N/A	#N/A
119412	RP11-872D17.4	11	57092994	57095577	458.518	367	0	0	1	0	1	1	0	#N/A	#N/A	#N/A	#N/A	#N/A	#N/A
427447	ETS2	21	40174503	40179024	458.249	368	0	0	1	1	1	0	0	ENSG00000157557	13.0477	4.65831	31.3553	2.05426	90.2487
258729	TM2D3	15	102181817	102190383	457.766	369	0	0	1	0	1	1	0	ENSG00000184277	11.9475	15.1741	6.19635	22.0343	72.8357
258729	RNU6-807P	15	102181817	102190383	457.766	369	0	0	1	0	1	1	0	ENSG00000252614	2.24301e-05	2.87289e-05	3.60964e-05	2.34012e-05	0.000106137
576253	CCNB1	5	68455173	68465434	457.569	370	0	0	1	0	1	0	1	ENSG00000134057	83.912	4.09672	54.8099	0.665035	0.449294
576253	RN7SL103P	5	68455173	68465434	457.569	370	0	0	1	0	1	0	1	ENSG00000265968	3.10264e-06	3.39771e-06	2.97478e-06	3.42278e-06	1.27135e-05
576253	SNORA50	5	68455173	68465434	457.569	370	0	0	1	0	1	0	1	ENSG00000206952	#N/A	#N/A	#N/A	#N/A	#N/A
408661	SNORD17	20	17940563	17945640	457.314	371	0	0	1	1	1	1	0	ENSG00000212232	2075.68	2296.32	1067.12	3709.76	10210.5
408661	SNX5	20	17940563	17945640	457.314	371	0	0	1	1	1	1	0	ENSG00000089006	58.7757	64.3763	50.5761	21.2522	4.57019
700767	C7orf73	7	135346487	135347648	456.484	372	0	0	1	0	0	0	1	ENSG00000243317	32.3293	16.5525	24.0464	9.33921	13.0065
616879	SOX4	6	21593556	21594408	456.455	373	0	0	1	0	1	1	0	ENSG00000124766	1.38143	7.10274	2.39685	0.95482	0.0451962
625422	EFHC1	6	52280078	52286637	455.541	374	0	1	1	1	1	1	1	ENSG00000096093	2.32909	1.25879	1.73164	1.69568	2.92454
558337	ANKRD33B-AS1	5	10627491	10629749	454.204	375	0	0	1	1	1	0	1	ENSG00000250106	0.000222626	1.81453e-06	2.72182e-05	1.21929e-06	4.59795e-06
739976	ENY2	8	110345036	110352025	453.365	376	0	0	1	0	1	1	0	ENSG00000120533	61.8452	50.7224	77.1363	18.4153	39.3623
739976	NUDCD1	8	110345036	110352025	453.365	376	0	0	1	0	1	1	0	ENSG00000120526	8.33379	4.32561	9.54051	5.33494	0.0475931
668944	OSBPL3	7	25019105	25021358	453.138	377	0	0	1	1	1	0	0	ENSG00000070882	11.1056	4.86092	13.7579	5.59049	0.129094
770849	KIF27	9	86534310	86539412	452.58	378	0	1	1	1	1	1	1	ENSG00000165115	2.50331	1.62949	2.39654	6.96054	31.8521
687928	GATAD1	7	92074886	92079481	451.324	379	0	0	1	0	1	0	0	ENSG00000157259	7.51728	11.927	10.3029	6.7679	3.23194
343239	CDKL4	2	39453149	39459164	450.154	380	0	0	1	0	1	1	0	ENSG00000205111	0.094388	0.431218	0.381689	0.136234	0.00667288
213904	RNU6-541P	14	31607757	31615732	448.672	381	0	0	1	1	1	0	0	ENSG00000207440	2.44853e-05	2.65279e-05	1.74936e-05	2.60284e-05	8.09218e-05
572242	SETD9	5	56200127	56206896	448.34	382	0	0	1	0	1	0	1	ENSG00000155542	3.61781	4.71653	3.74778	1.6608	7.15685
572242	AC008937.3	5	56200127	56206896	448.34	382	0	0	1	0	1	0	1	#N/A	#N/A	#N/A	#N/A	#N/A	#N/A
162049	SNORA70G	12	69019902	69022457	448.229	383	0	0	1	1	1	0	0	ENSG00000206650	1.19038e-05	1.26731e-05	1.12553e-05	1.34936e-05	5.64665e-05
162049	RP11-254B13.4	12	69019902	69022457	448.229	383	0	0	1	1	1	0	0	#N/A	#N/A	#N/A	#N/A	#N/A	#N/A
211269	DAD1	14	23057696	23058407	448.119	384	0	0	1	0	1	0	0	ENSG00000129562	71.308	101.832	182.628	40.2257	51.5163
253516	FAM103A1	15	83654378	83656144	447.813	385	0	0	1	0	1	0	0	ENSG00000169612	11.5625	12.6174	12.3806	7.75787	21.2702
253516	HOMER2	15	83654378	83656144	447.813	385	0	0	1	0	1	0	0	ENSG00000103942	5.56095	2.69587	7.22622	0.903642	0.47855
93950	MIR609	10	105978324	105979511	447.794	386	0	0	1	0	1	0	0	ENSG00000208033	2.3178e-05	3.6224e-05	3.27596e-05	2.94063e-05	0.000167045
545464	U3	4	159621114	159625434	446.087	387	0	1	1	0	0	0	0	#N/A	#N/A	#N/A	#N/A	#N/A	#N/A
644226	RP11-544L8__B.4	6	114222879	114226021	444.952	388	0	0	1	1	1	0	1	#N/A	#N/A	#N/A	#N/A	#N/A	#N/A
590960	FEM1C	5	114879660	114881446	444.944	389	0	1	1	1	1	1	1	ENSG00000145780	3.99354	10.8601	2.54754	3.9549	21.33
745048	KIAA0196-AS1	8	126048044	126054357	444.406	390	0	0	1	0	1	0	0	ENSG00000253167	8.77573e-07	4.8494e-06	8.09912e-07	1.03667e-06	1.30453e-05
229048	SNORA79	14	81667655	81671398	444.227	391	0	1	1	1	1	1	1	ENSG00000221303	10.0507	4.12896	6.79033	1.43835	3.80186
760903	NDUFB6	9	32572017	32578512	443.543	392	0	0	1	1	1	0	0	ENSG00000165264	23.4735	28.9151	14.4834	5.42399	36.424
82408	JMJD1C	10	65224180	65225972	443.327	393	0	0	1	1	0	0	0	ENSG00000171988	55.1454	22.2128	20.6655	44.5694	516.805
82408	JMJD1C-AS1	10	65224180	65225972	443.327	393	0	0	1	1	0	0	0	ENSG00000272767	#N/A	#N/A	#N/A	#N/A	#N/A
507731	KLF3	4	38664202	38668073	442.707	394	0	0	1	1	1	1	0	ENSG00000109787	57.7393	7.17066	13.4215	44.1746	125.288
507731	AC021860.1	4	38664202	38668073	442.707	394	0	0	1	1	1	1	0	#N/A	#N/A	#N/A	#N/A	#N/A	#N/A
507731	RP11-617D20.1	4	38664202	38668073	442.707	394	0	0	1	1	1	1	0	#N/A	#N/A	#N/A	#N/A	#N/A	#N/A
289577	NME1-NME2	17	49213795	49232205	442.535	395	0	1	1	1	1	1	1	ENSG00000243678	38.7234	90.0472	47.7827	19.9772	0.274475
289577	NME2	17	49213795	49232205	442.535	395	0	1	1	1	1	1	1	ENSG00000011052	37.3665	53.2922	56.3702	36.3326	0.124562
289577	NME1	17	49213795	49232205	442.535	395	0	1	1	1	1	1	1	ENSG00000239672	35.3011	14.4702	28.3895	7.48559	0.0578137
333911	RSAD2	2	7004499	7006565	442.483	396	1	0	1	0	0	0	0	ENSG00000134321	27.03	2.94039	1.65114	2.79668	21.4715
333911	CMPK2	2	7004499	7006565	442.483	396	1	0	1	0	0	0	0	ENSG00000134326	14.1858	2.48967	2.20228	1.93399	8.66828
438430	BHLHE40	3	5018512	5025724	441.539	397	0	1	1	1	1	1	1	ENSG00000134107	8.87465	22.384	16.2317	1.70115	41.8024
438430	BHLHE40-AS1	3	5018512	5025724	441.539	397	0	1	1	1	1	1	1	ENSG00000235831	0.0377292	0.175312	0.424492	0.158221	0.155368
357466	PTCD3	2	86329389	86333737	441.45	398	0	0	1	0	1	0	0	ENSG00000132300	42.0607	32.4444	30.2974	78.954	3.60877
357466	POLR1A	2	86329389	86333737	441.45	398	0	0	1	0	1	0	0	ENSG00000068654	6.59218	4.02894	4.38003	4.11871	0.122483
476685	ANAPC13	3	134201514	134205006	441.399	399	0	0	1	0	1	1	1	ENSG00000129055	12.1978	13.991	12.8264	9.14802	54.9241
476685	CEP63	3	134201514	134205006	441.399	399	0	0	1	0	1	1	1	ENSG00000182923	11.1471	7.14402	9.93572	9.92976	204.031
330590	SIGLEC14	19	52143468	52152262	441.187	400	0	0	1	0	1	0	0	ENSG00000254415	2.16602	4.59822	0.576266	0.00010555	12.3378
330590	SIGLEC5	19	52143468	52152262	441.187	400	0	0	1	0	1	0	0	ENSG00000105501	0.562565	0.85227	0.107827	0.000418536	59.3357
330590	RPL7P51	19	52143468	52152262	441.187	400	0	0	1	0	1	0	0	ENSG00000243469	1.05686e-06	0.000458966	2.40187e-05	2.76491e-06	0.00665387
451970	MANF	3	51421213	51425267	441.169	401	0	0	1	0	1	0	0	ENSG00000145050	19.807	19.6683	53.8804	7.05012	10.2296
337770	TTC32	2	20099736	20102869	439.765	402	0	0	1	1	1	1	0	ENSG00000183891	16.0539	6.47814	10.4361	28.9042	35.9593
337770	RP11-79O8.1	2	20099736	20102869	439.765	402	0	0	1	1	1	1	0	#N/A	#N/A	#N/A	#N/A	#N/A	#N/A
761030	SMU1	9	33075629	33079209	439.428	403	0	1	1	1	1	1	1	ENSG00000122692	24.647	27.5714	27.8276	29.6144	26.9432
371273	HNMT	2	138721229	138721933	438.984	404	0	0	1	1	1	0	0	ENSG00000150540	1.99757	44.7043	0.120357	0.0191245	0.0883127
576298	TAF9	5	68660962	68665828	438.978	405	0	0	1	0	0	0	1	ENSG00000085231	67.6863	44.8845	40.847	31.6838	8.30187
576298	RAD17	5	68660962	68665828	438.978	405	0	0	1	0	0	0	1	ENSG00000152942	10.539	8.39949	9.57808	11.0305	2.86304
631644	EEF1A1	6	74228212	74234059	438.464	406	0	0	1	1	0	1	1	ENSG00000156508	3357.2	2823.52	2902.94	7662.87	239.171
631644	RP11-505P4.7	6	74228212	74234059	438.464	406	0	0	1	1	0	1	1	#N/A	#N/A	#N/A	#N/A	#N/A	#N/A
170279	SOCS2	12	93963636	93966327	438.45	407	0	0	1	0	1	0	0	ENSG00000120833	24.1806	0.19258	11.0723	8.86047	0.0465417
170279	SOCS2-AS1	12	93963636	93966327	438.45	407	0	0	1	0	1	0	0	ENSG00000246985	1.22884	0.0110022	1.1061	1.24106	0.0155442
364107	ACTR3	2	114645986	114651473	438.305	408	0	1	1	1	1	1	1	ENSG00000115091	96.1264	270.402	198.819	89.792	546.129
364107	RP11-141B14.1	2	114645986	114651473	438.305	408	0	1	1	1	1	1	1	#N/A	#N/A	#N/A	#N/A	#N/A	#N/A
34305	PIAS3	1	145569758	145575726	437.751	409	0	0	1	0	1	0	0	ENSG00000131788	3.31209	2.29501	5.04754	2.53548	4.71431
156165	C12orf68	12	48575170	48579022	436.778	410	0	0	1	0	1	0	0	ENSG00000177875	1.48452e-07	4.3101e-06	1.8599e-07	0.0405356	0.00185684
587007	PPIP5K2	5	102455800	102465696	436.26	411	0	0	1	0	1	1	1	ENSG00000145725	63.9415	44.8084	44.6058	24.8724	60.9583
587007	GIN1	5	102455800	102465696	436.26	411	0	0	1	0	1	1	1	ENSG00000145723	1.48214	2.71086	0.801038	3.34788	2.88109
527406	SLC9B2	4	104005313	104009816	435.605	412	1	0	1	0	0	0	0	ENSG00000164038	3.72916	0.603813	5.72285	4.40078	0.100518
58621	TMEM78	1	229382957	229389680	435.387	413	0	0	1	1	1	1	0	ENSG00000177800	2.40544e-05	6.72534e-07	1.82977e-07	6.34109e-07	3.5709e-06
359099	DUSP2	2	96804799	96811949	434.458	414	0	1	1	1	1	1	1	ENSG00000158050	2.10994	48.8456	0.829444	11.5631	16.6181
760862	ACO1	9	32382623	32396972	434.037	415	0	0	1	1	1	0	1	ENSG00000122729	7.14461	23.0138	7.93413	2.22553	0.503064
359251	CNNM4	2	97425684	97428909	434.015	416	0	1	1	1	1	1	1	ENSG00000158158	1.60874	1.93333	1.99246	0.993713	3.49431
619744	NFKBIL1	6	31511143	31522203	433.975	417	0	0	1	1	1	0	1	ENSG00000204498	3.82089	4.66976	4.3075	2.77475	6.37797
619744	ATP6V1G2	6	31511143	31522203	433.975	417	0	0	1	1	1	0	1	ENSG00000213760	0.127185	0.0788409	0.185707	1.00936	0.704643
619744	ATP6V1G2-DDX39B	6	31511143	31522203	433.975	417	0	0	1	1	1	0	1	ENSG00000254870	0.0652985	0.267322	0.00714064	0.678809	0.248473
210694	TEP1	14	20880222	20889907	433.235	418	0	0	1	0	1	1	0	ENSG00000129566	2.42513	12.8482	14.609	9.3769	32.4308
210694	RNA5SP382	14	20880222	20889907	433.235	418	0	0	1	0	1	1	0	ENSG00000200225	2.91675e-05	2.80165e-05	2.07761e-05	2.27438e-05	0.000101373
618320	HIST1H2AE	6	26211692	26217488	432.892	419	0	0	1	0	0	0	1	ENSG00000168274	661.827	35.9537	293.51	72.6706	8.8863
618320	HIST1H2BG	6	26211692	26217488	432.892	419	0	0	1	0	0	0	1	ENSG00000187990	569.435	16.1427	270.508	84.6026	12.4953
590975	TICAM2	5	114937005	114941483	432.594	420	0	1	1	1	1	1	1	ENSG00000243414	1.62102	3.47452	0.396675	0.031411	2.80412
590975	AC010226.4	5	114937005	114941483	432.594	420	0	1	1	1	1	1	1	#N/A	#N/A	#N/A	#N/A	#N/A	#N/A
335524	TRIB2	2	12855737	12861599	432.5	421	0	0	1	0	1	1	1	ENSG00000071575	7.81808	0.150836	0.212908	33.2321	0.564945
27516	SLC30A7	1	101360898	101363055	432.4	422	0	0	1	0	1	1	0	ENSG00000162695	7.55768	16.4716	11.256	10.2955	8.43889
27516	EXTL2	1	101360898	101363055	432.4	422	0	0	1	0	1	1	0	ENSG00000162694	4.58983	2.27442	6.68683	1.12955	0.095302
611328	NQO2	6	2987622	2990617	432.044	423	0	0	1	0	1	1	0	ENSG00000124588	22.6453	22.1863	22.1046	2.61368	115.453
611328	LINC01011	6	2987622	2990617	432.044	423	0	0	1	0	1	1	0	ENSG00000244041	0.264919	0.696628	2.18183	0.935592	0.516986
71614	THNSL1	10	25303478	25306357	431.829	424	0	0	1	1	1	1	0	ENSG00000185875	0.51799	0.254972	1.5182	1.18651	0.000164992
71614	ENKUR	10	25303478	25306357	431.829	424	0	0	1	1	1	1	0	ENSG00000151023	0.0680375	0.00952766	0.733013	0.012981	0.0048686
636809	RP11-63K6.7	6	90626455	90630547	431.626	425	0	0	1	1	0	1	1	#N/A	#N/A	#N/A	#N/A	#N/A	#N/A
161958	MDM1	12	68723761	68734650	430.994	426	0	0	1	1	1	0	0	ENSG00000111554	8.32955	7.18311	32.0513	12.3239	14.048
161958	RP11-81H14.2	12	68723761	68734650	430.994	426	0	0	1	1	1	0	0	#N/A	#N/A	#N/A	#N/A	#N/A	#N/A
613651	PAK1IP1	6	10684206	10700235	430.972	427	1	0	1	0	0	0	0	ENSG00000111845	9.66063	7.6671	5.92034	2.55779	0.179039
613651	C6orf52	6	10684206	10700235	430.972	427	1	0	1	0	0	0	0	ENSG00000137434	0.454791	0.248274	0.110496	0.062856	0.0541631
337901	PUM2	2	20549888	20554524	429.897	428	0	0	1	1	0	1	1	ENSG00000055917	29.7944	14.1038	29.2994	31.244	105.74
337901	AC007041.1	2	20549888	20554524	429.897	428	0	0	1	1	0	1	1	#N/A	#N/A	#N/A	#N/A	#N/A	#N/A
228969	TSHR	14	81420768	81423583	429.006	429	0	1	1	1	1	1	1	ENSG00000165409	0.0194174	0.0111761	0.432013	0.0172946	0.0388622
186217	RFXAP	13	37389617	37398257	428.551	430	0	0	1	0	1	1	0	ENSG00000133111	3.89228	0.602416	1.22827	1.42627	0.337975
369116	PLEKHB2	2	131860828	131862553	427.839	431	0	0	1	0	1	1	1	ENSG00000115762	19.1861	80.6778	39.4825	10.3648	58.7112
157373	PFDN5	12	53688770	53692286	427.071	432	1	0	1	0	0	0	0	ENSG00000123349	144.827	325.386	110.355	448.062	208.264
135654	AP000908.1	11	113954239	113969656	426.948	433	0	0	1	0	1	0	0	#N/A	#N/A	#N/A	#N/A	#N/A	#N/A
745955	MIR1207	8	129061273	129066662	425.724	434	1	0	1	0	0	0	0	ENSG00000221176	3.63866e-05	4.48451e-05	3.77895e-05	4.79618e-05	0.000143399
492370	ABCF3	3	183902355	183908534	425.697	435	0	0	1	0	1	0	1	ENSG00000161204	8.69014	15.3462	6.24283	15.8954	28.9866
119493	ZDHHC5	11	57433061	57436176	425.642	436	0	0	1	0	1	1	1	ENSG00000156599	13.7584	18.191	14.5872	10.1232	29.6235
186924	PROSER1	13	39608238	39618828	425.54	437	0	0	1	0	1	1	0	ENSG00000120685	9.05402	3.78121	9.53367	4.33308	3.08464
186924	NHLRC3	13	39608238	39618828	425.54	437	0	0	1	0	1	1	0	ENSG00000188811	4.72602	21.393	8.10799	9.7117	1.59577
27293	SASS6	1	100596834	100598665	425.283	438	0	0	1	0	1	0	0	ENSG00000156876	9.51894	0.969473	5.4163	1.70047	2.257
258642	VIMP	15	101816805	101818647	424.855	439	0	0	1	1	1	0	0	ENSG00000131871	12.0025	21.7363	16.2095	5.9205	8.95437
651185	MYB	6	135500361	135506157	424.582	440	0	0	1	0	1	0	0	ENSG00000118513	22.7791	0.212099	3.37214	6.26187	3.47567
718395	PPAPDC1B	8	38123630	38127430	422.661	441	0	0	1	0	1	1	0	ENSG00000147535	3.55587	9.42994	18.1811	5.29641	4.74191
12631	SSBP3	1	54875902	54879620	422.059	442	0	0	1	1	0	1	0	ENSG00000157216	21.4003	17.5366	11.8966	18.7588	4.47796
744896	NDUFB9	8	125548958	125551957	421.264	443	0	0	1	0	1	0	0	ENSG00000147684	83.8005	164.575	79.491	44.3754	13.2737
744896	TATDN1	8	125548958	125551957	421.264	443	0	0	1	0	1	0	0	ENSG00000147687	6.0837	13.7073	3.19785	15.9697	3.05177
571198	FST	5	52772248	52777464	419.421	444	0	0	1	0	1	0	0	ENSG00000134363	2.1616	0.0674454	0.0273531	0.0623769	0.0145822
34311		1	145589482	145593096	418.1	445	0	1	1	0	0	0	0	#N/A	#N/A	#N/A	#N/A	#N/A	#N/A
211725	KHNYN	14	24899592	24905840	417.516	446	0	0	1	0	1	1	1	ENSG00000100441	19.2941	21.0885	12.8481	29.3824	80.2406
211725	CBLN3	14	24899592	24905840	417.516	446	0	0	1	0	1	1	1	ENSG00000139899	0.259461	0.609922	0.0617515	0.202988	0.47051
52053	PFKFB2	1	207221568	207223320	417.416	447	0	1	1	1	1	1	1	ENSG00000123836	5.31817	3.53459	5.90825	1.22282	18.7085
331331	RPL28	19	55892329	55898826	417.202	448	0	0	1	0	1	1	0	ENSG00000108107	188.792	132.975	118.47	368.354	79.0797
331331	TMEM238	19	55892329	55898826	417.202	448	0	0	1	0	1	1	0	ENSG00000233493	0.0585364	0.0677596	0.027534	0.378164	0.000882972
609823	COL23A1	5	178014106	178018757	416.801	449	0	0	1	1	1	0	0	ENSG00000050767	0.675612	0.169206	0.0333365	0.00340742	0.105068
22212	RPF1	1	84941119	84947206	415.977	450	0	0	1	1	1	0	1	ENSG00000117133	16.3909	19.5772	14.8392	27.5013	9.81865
728711	RPL7	8	74204618	74210717	415.844	451	0	0	1	0	1	1	1	ENSG00000147604	693.051	467.655	477.595	1585.4	51.9221
728711	RDH10	8	74204618	74210717	415.844	451	0	0	1	0	1	1	1	ENSG00000121039	5.36027	5.54038	2.64748	1.06833	0.975501
13994	MYSM1	1	59164479	59168269	415.155	452	0	1	1	1	1	1	1	ENSG00000162601	11.6578	9.64292	9.53879	17.1915	30.6111
416623	RNU7-14P	20	52277885	52285921	414.951	453	0	0	1	1	1	0	1	ENSG00000238468	5.64257e-05	7.2237e-05	7.84e-05	7.79845e-05	0.000233088
779291	POLE3	9	116171019	116175430	414.54	454	0	0	1	0	1	0	0	ENSG00000148229	28.3912	21.83	18.7248	21.1976	6.35933
779291	C9orf43	9	116171019	116175430	414.54	454	0	0	1	0	1	0	0	ENSG00000157653	0.180852	0.119639	0.149019	0.246197	0.0665821
397048	AAMP	2	219134749	219135860	414.358	455	0	0	1	0	1	1	1	ENSG00000127837	19.4789	31.1558	19.2115	15.7276	9.35279
397048	PNKD	2	219134749	219135860	414.358	455	0	0	1	0	1	1	1	ENSG00000127838	13.404	24.3612	28.8161	8.57631	5.31949
699484	MKLN1	7	130793408	130796988	414.292	456	0	1	1	1	1	1	1	ENSG00000128585	22.1673	14.8915	19.9607	32.5078	112.729
699484	LINC-PINT	7	130793408	130796988	414.292	456	0	1	1	1	1	1	1	ENSG00000231721	8.82911	6.13635	5.69408	47.8327	201.71
745065	NSMCE2	8	126101958	126108747	413.935	457	0	0	1	0	0	0	1	ENSG00000156831	28.6709	18.9922	14.0554	14.5306	10.8809
745065	KIAA0196	8	126101958	126108747	413.935	457	0	0	1	0	0	0	1	ENSG00000164961	18.0207	19.7607	15.0048	9.32987	9.61715
289553	RP11-481C4.1	17	49119440	49123261	413.509	458	0	1	1	1	1	1	1	#N/A	#N/A	#N/A	#N/A	#N/A	#N/A
124255	GAB2	11	78126420	78132016	412.545	459	0	1	1	1	1	1	1	ENSG00000033327	2.62643	9.54332	1.21257	0.356508	166.802
645144	KPNA5	6	117001890	117003880	412.475	460	0	0	1	1	1	1	0	ENSG00000196911	2.40256	3.50733	3.0094	29.1285	3.21892
594589	LMNB1	5	126110688	126115047	412.314	461	0	0	1	1	0	1	0	ENSG00000113368	50.6908	7.85648	37.1043	6.51462	411.614
594589	RP11-434D11.4	5	126110688	126115047	412.314	461	0	0	1	1	0	1	0	#N/A	#N/A	#N/A	#N/A	#N/A	#N/A
770859	C9orf64	9	86566536	86574615	412.105	462	0	1	1	1	1	1	1	ENSG00000165118	4.79292	5.45062	3.13919	1.1123	1.79065
423843	ADAMTS1	21	28214457	28218321	412.083	463	0	0	1	1	1	0	0	ENSG00000154734	0.484922	0.00425491	0.327874	0.0311774	0.0226875
560325	BASP1	5	17215151	17220655	411.806	464	0	0	1	1	1	0	0	ENSG00000176788	2.3295	23.4036	3.74562	0.0414384	590.241
560325	AC091878.1	5	17215151	17220655	411.806	464	0	0	1	1	1	0	0	#N/A	#N/A	#N/A	#N/A	#N/A	#N/A
330557	CEACAM18	19	51977821	51987569	411.486	465	0	0	1	1	1	0	0	ENSG00000213822	4.75114e-05	0.000110346	7.49572e-05	9.41008e-05	0.000287461
337931	RHOB	2	20646104	20649778	410.328	466	0	0	1	1	1	0	1	ENSG00000143878	8.95108	6.98418	5.69687	1.01155	101.96
30860	DDX20	1	112294296	112300306	409.826	467	0	0	1	1	1	0	1	ENSG00000064703	5.02725	4.85286	4.37101	9.2253	2.91338
30860	FAM212B	1	112294296	112300306	409.826	467	0	0	1	1	1	0	1	ENSG00000197852	1.12826	2.20324	3.8128	0.224793	95.0497
241475	PLCB2	15	40566825	40581870	409.378	468	0	0	1	1	1	1	0	ENSG00000137841	4.37862	52.4748	41.2579	23.3286	226.997
241475	ANKRD63	15	40566825	40581870	409.378	468	0	0	1	1	1	1	0	ENSG00000230778	0.0117881	0.0810826	0.0921906	3.8725e-07	0.000133938
516869	UTP3	4	71549152	71555823	409.051	469	0	0	1	1	1	1	0	ENSG00000132467	9.7281	10.8437	7.18273	5.98912	0.952796
432936	LL22NC01-116C6.1	22	33178967	33185615	408.167	470	0	0	1	1	1	0	0	#N/A	#N/A	#N/A	#N/A	#N/A	#N/A
530413	C4orf32	4	113063940	113067469	407.926	471	0	0	1	1	0	1	1	ENSG00000174749	4.16276	2.44449	1.22011	3.52643	2.20919
477869	FAIM	3	138324398	138329194	407.62	472	0	0	1	1	1	1	0	ENSG00000158234	1.07936	16.3736	2.34913	1.34292	0.0811318
129689	SESN3	11	94965330	94970670	407.307	473	0	0	1	0	1	1	0	ENSG00000149212	7.88659	3.90115	1.66887	42.2764	14.5155
129689	RP11-712B9.2	11	94965330	94970670	407.307	473	0	1	1	0	1	1	0	#N/A	#N/A	#N/A	#N/A	#N/A	#N/A
38252	FCGR2A	1	161475215	161475902	407.116	474	1	0	1	0	0	0	0	ENSG00000143226	21.3606	26.1724	112.937	0.0440357	2214.74
743444	DSCC1	8	120865777	120868643	406.832	475	0	0	1	0	1	0	0	ENSG00000136982	7.65442	0.326876	4.27561	0.0586653	0.0052451
4120	UBR4	1	19531652	19537425	406.734	476	0	0	1	0	1	0	1	ENSG00000127481	43.9619	22.0737	58.2993	25.2538	71.5857
4120	RP1-43E13.2	1	19531652	19537425	406.734	476	0	0	1	0	1	0	1	#N/A	#N/A	#N/A	#N/A	#N/A	#N/A
85577	RP11-77G23.5	10	76781131	76784439	406.537	477	0	0	1	1	1	1	0	#N/A	#N/A	#N/A	#N/A	#N/A	#N/A
382429	DLX2	2	172966044	172973100	406.428	478	0	0	1	0	1	0	0	ENSG00000115844	0.0703441	0.000115572	0.018348	3.66519e-05	0.000309049
382429	AC104801.1	2	172966044	172973100	406.428	478	0	0	1	0	1	0	0	#N/A	#N/A	#N/A	#N/A	#N/A	#N/A
32424	RP11-27K13.3	1	117600462	117602628	406.055	479	0	0	1	1	1	1	0	#N/A	#N/A	#N/A	#N/A	#N/A	#N/A
174909	RNU7-169P	12	109061924	109063629	406.049	480	0	0	1	0	1	0	1	ENSG00000238457	5.62403e-05	7.88523e-05	6.58347e-05	6.83885e-05	0.000259503
576299	TAF9	5	68665829	68670977	405.914	481	0	0	1	0	0	0	1	ENSG00000085231	67.6863	44.8845	40.847	31.6838	8.30187
576299	RAD17	5	68665829	68670977	405.914	481	0	0	1	0	0	0	1	ENSG00000152942	10.539	8.39949	9.57808	11.0305	2.86304
699184	KLHDC10	7	129700791	129711530	405.561	482	0	0	1	0	1	0	0	ENSG00000128607	5.24536	7.98686	7.71066	5.70176	6.58584
762231	SLC25A51	9	37902767	37907347	405.18	483	0	0	1	1	1	0	0	ENSG00000122696	11.0381	12.1766	7.27429	11.9368	8.26082
273743	AARS	16	70313654	70325070	404.796	484	0	0	1	0	1	0	0	ENSG00000090861	90.5035	18.7492	67.8942	9.42964	0.340914
273743	DDX19B	16	70313654	70325070	404.796	484	0	0	1	0	1	0	0	ENSG00000157349	10.9387	10.9611	8.4509	9.70762	3.30308
148173	CMAS	12	22191147	22201541	403.737	485	1	0	1	0	0	0	0	ENSG00000111726	40.3271	16.9692	80.471	5.8837	0.821964
256110	FAM174B	15	93346888	93354331	403.653	486	0	0	1	0	0	1	1	ENSG00000185442	0.258219	0.555664	0.325179	0.851133	8.43948
256110	CTD-2313J17.1	15	93346888	93354331	403.653	486	0	0	1	0	0	1	1	#N/A	#N/A	#N/A	#N/A	#N/A	#N/A
10422	TSPAN1	1	46636405	46641230	403.523	487	0	0	1	0	1	0	0	ENSG00000117472	0.00913104	0.0154003	0.0114014	0.0165147	0.0455248
675092	IGFBP3	7	45955727	45963820	402.861	488	0	0	1	1	1	0	0	ENSG00000146674	0.00766914	0.019865	0.00847682	0.903382	0.0469775
76691	ZFAND4	10	46167435	46171636	402.688	489	0	0	1	1	0	0	1	ENSG00000172671	15.922	1.44686	2.76803	11.8608	5.09939
572230	AC008937.2	5	56154298	56165554	402.593	490	0	1	1	1	1	1	1	#N/A	#N/A	#N/A	#N/A	#N/A	#N/A
30214	GNAI3	1	110088719	110094876	402.483	491	0	0	1	1	1	0	0	ENSG00000065135	22.4925	37.4634	22.5436	14.1812	131.71
690044	ZSCAN25	7	99213081	99215681	401.38	492	1	0	1	0	0	0	0	ENSG00000197037	5.38132	3.03852	3.72313	9.93526	7.53677
265916	SEPHS2	16	30453716	30462199	401.052	493	1	0	1	0	0	0	0	ENSG00000179918	16.4392	23.6244	11.0009	5.20787	16.1776
371444	SPOPL	2	139256825	139262039	401.01	494	0	0	1	1	1	0	1	ENSG00000144228	5.80938	13.7594	5.73968	4.28922	183.81
371444	AC097721.2	2	139256825	139262039	401.01	494	0	0	1	1	1	0	1	#N/A	#N/A	#N/A	#N/A	#N/A	#N/A
615820	NHLRC1	6	18122212	18128318	400.633	495	0	0	1	1	1	0	1	ENSG00000187566	0.749051	0.764894	0.766739	0.187492	5.37677e-05
352740	SNRNP27	2	70123345	70127951	400.504	496	0	0	1	0	1	1	1	ENSG00000124380	17.3436	15.444	22.7514	17.2615	10.7753
352740	MXD1	2	70123345	70127951	400.504	496	0	0	1	0	1	1	1	ENSG00000059728	12.3518	10.9543	30.1639	2.52577	1047.33
744475	DERL1	8	124049135	124055921	400.405	497	0	0	1	1	0	1	1	ENSG00000136986	16.6361	33.2753	20.3491	11.1318	23.3465
744475	TBC1D31	8	124049135	124055921	400.405	497	0	0	1	1	0	1	1	ENSG00000156787	10.2586	5.74504	6.83452	10.0556	1.24232
543683	MND1	4	154260455	154267166	400.233	498	0	0	1	1	1	1	0	ENSG00000121211	7.61789	0.312985	2.75088	0.115914	0.353134
651101	RP11-349J5.2	6	135261568	135264260	398.069	499	0	1	1	1	1	1	1	#N/A	#N/A	#N/A	#N/A	#N/A	#N/A
171137	CDK17	12	96792262	96795604	397.99	500	0	1	1	1	1	1	1	ENSG00000059758	18.196	18.3207	29.3861	39.0732	82.1036
618794	HIST1H2AJ	6	27782229	27786337	397.321	501	0	0	1	1	1	0	0	ENSG00000182611	901.075	2.21801	384.387	1.76456	2.03226
618794	HIST1H2BM	6	27782229	27786337	397.321	501	0	0	1	1	1	0	0	ENSG00000196374	357.537	1.44223	160.581	2.48862	0.930017
103446	OR52A4	11	5142234	5145925	396.133	502	0	0	1	0	1	0	0	ENSG00000205494	0.00397794	0.00146959	0.00132234	0.00150757	0.00553259
53530	DTL	1	212208814	212217647	395.994	503	0	0	1	0	1	1	0	ENSG00000143476	19.8506	0.686032	9.4636	0.0701614	0.234692
53530	INTS7	1	212208814	212217647	395.994	503	0	0	1	0	1	1	0	ENSG00000143493	10.2686	3.96677	7.79514	2.78215	0.47338
6638	MATN1-AS1	1	31188386	31193343	395.902	504	0	0	1	0	1	1	0	ENSG00000186056	1.00197	0.323608	0.168036	3.06749	0.437859
6638	MATN1	1	31188386	31193343	395.902	504	0	0	1	0	1	1	0	ENSG00000162510	0.144566	0.00371094	0.00315293	0.202208	0.166579
129876	CEP57	11	95509487	95524050	395.724	505	0	0	1	0	0	1	0	ENSG00000166037	31.7794	11.7392	23.0652	25.8675	13.9275
129876	FAM76B	11	95509487	95524050	395.724	505	0	0	1	0	0	1	0	ENSG00000077458	21.672	8.71463	17.6192	29.6135	44.932
682712	CCL24	7	75451733	75454701	394.996	506	1	0	1	0	0	0	0	ENSG00000106178	0.290728	0.0967343	0.000811435	0.000176888	0.000613272
516912	GRSF1	4	71704150	71713222	394.806	507	0	0	1	1	0	0	0	ENSG00000132463	27.5692	34.5825	25.265	23.5846	4.02239
616519	E2F3	6	20400928	20403179	394.791	508	0	0	1	0	1	1	1	ENSG00000112242	9.20902	4.46144	13.5825	1.8479	25.146
383600	HOXD3	2	176999630	177004368	394.421	509	0	0	1	0	1	0	0	ENSG00000128652	0.00125135	0.00162057	0.00132728	0.00276936	0.00594444
383600	HOXD-AS2	2	176999630	177004368	394.421	509	0	0	1	0	1	0	0	ENSG00000237380	6.9369e-05	9.21672e-05	7.58047e-05	9.67131e-05	0.000343851
78347	SGMS1	10	52379566	52392356	394.37	510	0	0	1	1	1	0	0	ENSG00000198964	22.7514	13.9807	24.472	9.02565	18.7654
78347	RP11-50E11.2	10	52379566	52392356	394.37	510	0	0	1	1	1	0	0	#N/A	#N/A	#N/A	#N/A	#N/A	#N/A
78347	RP11-50E11.3	10	52379566	52392356	394.37	510	0	0	1	1	1	0	0	#N/A	#N/A	#N/A	#N/A	#N/A	#N/A
553298	WWC2-AS1	4	184158294	184169833	393.606	511	0	0	1	0	1	0	0	ENSG00000251128	0.000213291	1.47868e-06	4.08289e-05	1.56493e-06	6.38775e-06
699365	KLF14	7	130415578	130420020	393.363	512	0	0	1	0	1	0	0	ENSG00000174595	3.10319e-05	3.63486e-05	1.20087e-05	3.61666e-07	9.66422e-06
130059	CCDC82	11	96122634	96123856	393.1	513	0	0	1	1	1	1	0	ENSG00000149231	12.6513	9.99017	21.4674	22.7695	28.5179
130059	JRKL	11	96122634	96123856	393.1	513	0	0	1	1	1	1	0	ENSG00000183340	1.88589	2.36549	3.30414	2.68227	1.23027
357475	SNORD94	2	86362143	86364441	392.296	514	0	0	1	0	1	0	0	ENSG00000208772	208.903	254.707	57.4239	713.048	842.892
470205	ATG3	3	112279729	112281537	392.041	515	0	0	1	0	0	1	0	ENSG00000144848	32.894	44.6121	18.9704	13.7775	145.391
470205	SLC35A5	3	112279729	112281537	392.041	515	0	0	1	0	0	1	0	ENSG00000138459	9.01418	17.4466	11.1876	6.90518	24.2121
662837	ACTB	7	5601713	5619438	391.744	516	0	0	1	0	1	0	0	ENSG00000075624	754.99	2118.12	2748.17	462.405	3852.97
690774	PMPCB	7	102934997	102946345	391.279	517	0	0	1	0	1	0	0	ENSG00000105819	30.3903	24.468	20.6409	38.5702	19.1725
339783	GTF3C2	2	27577243	27583742	391.231	518	0	0	1	0	0	0	1	ENSG00000115207	10.3205	15.3761	9.55773	16.0453	10.8756
339783	AC074117.10	2	27577243	27583742	391.231	518	0	0	1	0	0	0	1	#N/A	#N/A	#N/A	#N/A	#N/A	#N/A
210943	CHD8	14	21860168	21869665	391.12	519	0	0	1	0	1	0	0	ENSG00000100888	16.7675	14.5108	28.6079	22.4646	57.6909
210943	SNORD9	14	21860168	21869665	391.12	519	0	0	1	0	1	0	0	ENSG00000199436	13.34	17.7879	4.16375	54.2149	143.615
210943	SNORD8	14	21860168	21869665	391.12	519	0	0	1	0	1	0	0	ENSG00000200785	12.3393	32.3581	10.6118	73.4604	207.477
210943	RP11-689J19.1	14	21860168	21869665	391.12	519	0	0	1	0	1	0	0	#N/A	#N/A	#N/A	#N/A	#N/A	#N/A
331336	UBE2S	19	55912942	55922626	390.986	520	1	0	1	0	0	0	0	ENSG00000108106	72.3152	8.67605	44.2594	2.72059	11.508
618323	HIST1H3E	6	26223256	26234412	390.624	521	0	0	1	0	0	1	1	ENSG00000196966	23.3297	3.77025	10.5245	2.53336	1.00887
618323	HIST1H2APS3	6	26223256	26234412	390.624	521	0	0	1	0	0	1	1	ENSG00000218281	1.12083e-05	1.64025e-05	1.54196e-05	1.68958e-05	5.88602e-05
450684	LARS2-AS1	3	45549842	45551539	390.479	522	0	0	1	1	1	0	0	ENSG00000232455	1.11377e-06	9.30676e-07	9.12291e-07	9.72732e-07	3.87099e-06
434118	TMPRSS6	22	37475724	37484017	390.448	523	1	0	1	0	0	0	0	ENSG00000187045	0.0027728	0.00399481	0.00306521	0.0262961	0.0134798
434118	RP5-1170K4.7	22	37475724	37484017	390.448	523	1	0	1	0	0	0	0	#N/A	#N/A	#N/A	#N/A	#N/A	#N/A
675560	TNS3	7	47614634	47624339	390.118	524	0	0	1	1	1	0	0	ENSG00000136205	3.42782	51.162	0.213314	0.0736517	0.102478
86344	KCNMA1	10	79394612	79399403	389.585	525	0	0	1	1	1	0	1	ENSG00000156113	0.102515	0.488596	0.0545152	0.0321735	0.521708
112751	APIP	11	34937402	34946813	389.538	526	0	0	1	1	1	1	0	ENSG00000149089	9.72679	18.2201	9.596	5.90409	2.37024
112751	PDHX	11	34937402	34946813	389.538	526	0	0	1	1	1	1	0	ENSG00000110435	8.77309	14.624	8.90874	12.4778	6.04068
321938	CDKN2D	19	10677260	10686369	389.142	527	0	0	1	0	0	0	1	ENSG00000129355	6.84185	1.85518	73.3388	12.9232	227.043
95999	SMC3	10	112327256	112329436	388.333	528	0	0	1	0	1	1	0	ENSG00000108055	28.3372	11.3882	22.3178	17.1295	14.6857
394409	KANSL1L	2	211030130	211037931	388.077	529	0	0	1	0	1	1	1	ENSG00000144445	7.59894	4.08233	9.60564	5.80509	19.7632
394409	AC006994.2	2	211030130	211037931	388.077	529	0	0	1	0	1	1	1	#N/A	#N/A	#N/A	#N/A	#N/A	#N/A
394409	AC006994.3	2	211030130	211037931	388.077	529	0	0	1	0	1	1	1	#N/A	#N/A	#N/A	#N/A	#N/A	#N/A
112583	ABTB2	11	34376256	34385647	388.043	530	0	0	1	1	1	1	0	ENSG00000166016	0.129149	0.406199	0.0306676	0.0521018	1.66795
317542	RTTN	18	67871441	67876672	385.69	531	0	0	1	1	1	1	0	ENSG00000176225	7.24451	1.2896	4.12436	9.10447	0.350994
493696	TPRG1	3	188663787	188665395	385.434	532	0	0	1	0	1	0	0	ENSG00000188001	0.0458997	5.90875	0.039366	0.331273	0.806132
598695	PCDHB8	5	140556909	140558389	384.965	533	0	0	1	0	0	0	1	ENSG00000120322	1.294e-07	1.84082e-07	1.28209e-07	1.30327e-06	6.55582e-07
475234	RNU6-1142P	3	129534610	129544206	384.718	534	0	0	1	1	1	0	0	ENSG00000252786	2.07554e-05	2.95673e-05	3.38294e-05	3.07399e-05	0.000127426
475234	Y_RNA	3	129534610	129544206	384.718	534	0	0	1	1	1	0	0	#N/A	#N/A	#N/A	#N/A	#N/A	#N/A
288774	KPNB1	17	45722559	45728999	384.615	535	1	0	1	0	0	0	0	ENSG00000108424	70.2313	69.7628	71.4237	56.5118	307.849
288774	RP11-580I16.2	17	45722559	45728999	384.615	535	1	0	1	0	0	0	0	#N/A	#N/A	#N/A	#N/A	#N/A	#N/A
240848	SPRED1	15	38541154	38545509	384.195	536	0	0	1	1	1	0	0	ENSG00000166068	3.34695	11.8254	2.09802	0.0393632	0.235082
35352	MTMR11	1	149907731	149919378	384.041	537	0	0	1	0	1	0	0	ENSG00000014914	0.166122	1.69877	0.190194	0.135958	0.0628556
34291	RBM8A	1	145503235	145513770	383.496	538	0	0	1	0	0	1	1	ENSG00000131795	41.5278	48.62	41.6597	28.8217	66.7463
34291	RP11-315I20.1	1	145503235	145513770	383.496	538	0	0	1	0	0	1	1	#N/A	#N/A	#N/A	#N/A	#N/A	#N/A
358007	THNSL2	2	88464032	88472383	383.279	539	0	0	1	1	0	1	1	ENSG00000144115	0.210815	0.322452	0.0286022	0.342638	0.504251
198700	C13orf45	13	76443598	76447562	382.811	540	0	0	1	1	1	0	0	ENSG00000178734	2.59501e-07	3.55967e-06	3.67587e-07	0.000509904	1.49186e-06
632179	TMEM30A	6	75992327	76005024	382.069	541	0	1	1	1	1	1	1	ENSG00000112697	16.3732	70.1064	27.2555	20.3866	90.6351
632179	RP1-234P15.4	6	75992327	76005024	382.069	541	0	1	1	1	1	1	1	#N/A	#N/A	#N/A	#N/A	#N/A	#N/A
219748	RNU6-189P	14	50364518	50374508	381.692	542	0	0	1	1	0	1	0	ENSG00000251929	3.4524e-05	3.00014e-05	2.85313e-05	3.16851e-05	0.000127656
157630	GPR84	12	54757256	54764824	381.23	543	0	0	1	0	1	0	1	ENSG00000139572	0.00136876	1.10794	0.0331689	0.000232981	4.88866
65802	AKR1C3	10	5135512	5137754	380.955	544	0	0	1	1	1	0	0	ENSG00000196139	23.9026	0.860249	0.128794	1.11503	0.242901
65802	U8	10	5135512	5137754	380.955	544	0	0	1	1	1	0	0	#N/A	#N/A	#N/A	#N/A	#N/A	#N/A
53304	KCNH1	1	211302811	211313392	380.552	545	0	0	1	1	1	0	0	ENSG00000143473	0.000295416	4.58659e-05	0.000634874	4.66824e-05	8.90435e-05
53304	KCNH1-IT1	1	211302811	211313392	380.552	545	0	0	1	1	1	0	0	ENSG00000234233	1.08075e-06	9.54968e-07	9.35479e-07	8.59088e-07	3.19074e-06
572228	snoU13	5	56152659	56153353	380.513	546	0	1	1	1	1	1	1	#N/A	#N/A	#N/A	#N/A	#N/A	#N/A
709785	ERI1	8	8856217	8861371	380.271	547	0	0	1	0	0	1	0	ENSG00000104626	21.0807	6.94664	4.43259	2.07069	10.4779
260576	TMEM114	16	8621800	8623057	379.931	548	0	1	1	1	1	1	1	ENSG00000232258	0.000140977	0.334127	0.00016047	0.000178921	0.000626123
48024	RGS2	1	192774793	192779385	379.732	549	0	1	1	1	1	1	1	ENSG00000116741	13.6641	19.1243	2.43085	6.96576	2867.02
106954	C11orf58	11	16628042	16635632	378.686	550	0	0	1	0	1	0	0	ENSG00000110696	68.1314	76.1867	76.0697	89.5599	40.3527
106954	SOX6	11	16628042	16635632	378.686	550	0	0	1	0	1	0	0	ENSG00000110693	25.3588	0.0528116	0.079642	0.0659997	0.637497
239497	CHRM5	15	34260326	34261294	378.47	551	0	0	1	0	1	0	0	ENSG00000184984	0.000965006	0.00483745	0.00245187	0.00393616	0.00280056
242710	SPATA5L1	15	45693059	45696304	378.364	552	0	0	1	1	1	1	0	ENSG00000171763	3.63778	4.51477	1.92627	2.92089	15.2724
242710	GATM	15	45693059	45696304	378.364	552	0	0	1	1	1	1	0	ENSG00000171766	1.70893	3.56788	4.88795	0.183666	0.112411
181160	PSPC1	13	20356073	20358158	377.83	553	1	0	1	0	0	0	0	ENSG00000121390	21.2135	21.9097	17.9164	29.8099	46.7745
119513	C11orf31	11	57507974	57508922	377.777	554	0	0	1	0	1	1	0	ENSG00000211450	40.2785	69.4146	70.0767	32.3979	2.96304
648167	HINT3	6	126270008	126279221	377.104	555	0	0	1	0	1	0	0	ENSG00000111911	4.89069	12.1934	4.88929	4.17931	11.062
44808	NPL	1	182757765	182764391	375.869	556	0	0	1	1	1	0	0	ENSG00000135838	21.8159	64.9778	11.5314	1.27675	172.999
22219	GNG5	1	84970647	84978264	375.45	557	0	0	1	0	1	0	1	ENSG00000174021	46.7322	60.5796	41.1051	8.72155	76.1174
22219	SPATA1	1	84970647	84978264	375.45	557	0	0	1	0	1	0	1	ENSG00000122432	0.591052	1.27734	0.713631	0.151901	3.5844
369112	FAM168B	2	131850103	131852483	375.165	558	0	0	1	0	0	1	1	ENSG00000152102	11.0102	19.2206	14.7133	13.4706	19.2688
426998	DSCR3	21	38635925	38642685	375.078	559	0	0	1	0	1	1	0	ENSG00000157538	16.8803	30.8894	30.1545	16.8655	35.7715
426998	AP001412.1	21	38635925	38642685	375.078	559	0	0	1	0	1	1	0	#N/A	#N/A	#N/A	#N/A	#N/A	#N/A
682263	RNU6-1198P	7	72914906	72922765	374.597	560	1	0	1	0	0	0	0	ENSG00000252713	6.25596e-05	7.63845e-05	5.24972e-05	7.75086e-05	0.000224815
66440	SFMBT2	10	7452579	7457450	374.197	561	1	0	1	0	0	0	0	ENSG00000198879	2.26797	4.16711	0.299163	10.063	0.757699
36882	RP11-66D17.5	1	156682729	156685224	374.093	562	0	0	1	0	1	0	0	#N/A	#N/A	#N/A	#N/A	#N/A	#N/A
413481	ZHX3	20	39944116	39951817	373.497	563	0	0	1	0	0	1	0	ENSG00000174306	4.37464	2.33573	3.76023	2.04334	0.292779
483659	TIPARP	3	156385298	156394032	373.311	564	0	0	1	1	1	1	0	ENSG00000163659	17.5943	17.5321	55.7392	12.5413	28.7466
483659	TIPARP-AS1	3	156385298	156394032	373.311	564	0	0	1	1	1	1	0	ENSG00000243926	0.789599	1.07276	1.74294	2.12909	0.0524323
719554	VDAC3	8	42240309	42250299	373.204	565	0	0	1	0	1	1	0	ENSG00000078668	68.2126	50.5245	101.576	35.4537	25.3234
727752	snoU13	8	71515118	71517108	373.182	566	0	1	1	0	1	1	1	#N/A	#N/A	#N/A	#N/A	#N/A	#N/A
429838	MICAL3	22	18504558	18508621	372.623	567	0	0	1	0	1	0	0	ENSG00000243156	12.0859	1.54995	6.0821	1.56268	0.266218
582310	LINC00461	5	87971924	87977835	371.821	568	0	1	1	1	1	1	1	ENSG00000245526	0.0218713	0.0301458	0.0425911	0.0319345	0.113619
582310	CTC-467M3.1	5	87971924	87977835	371.821	568	0	1	1	1	1	1	1	#N/A	#N/A	#N/A	#N/A	#N/A	#N/A
391293	C2orf47	2	200813322	200821129	370.845	569	0	0	1	1	1	1	0	ENSG00000162972	8.61878	8.41667	6.52375	7.48164	2.32731
391293	TYW5	2	200813322	200821129	370.845	569	0	0	1	1	1	1	0	ENSG00000162971	3.24862	3.37072	4.31038	6.32181	2.73803
612533	snoU13	6	7038449	7043261	370.625	570	0	1	1	1	1	0	0	#N/A	#N/A	#N/A	#N/A	#N/A	#N/A
706203	PAXIP1-AS2	7	154718902	154726320	370.559	571	0	1	1	1	1	1	1	ENSG00000214106	1.37847	3.36591	0.401284	4.97055	2.46578
343130	SRSF7	2	38973630	38988104	370.202	572	1	0	1	0	0	0	0	ENSG00000115875	72.7264	54.14	56.7584	92.7874	19.9332
343130	GEMIN6	2	38973630	38988104	370.202	572	1	0	1	0	0	0	0	ENSG00000152147	5.02492	5.26361	3.66256	2.81062	0.0992686
620964	PIM1	6	37136222	37141919	370.185	573	1	0	1	0	0	0	0	ENSG00000137193	243.855	15.3208	61.7207	69.6322	68.9475
451685	NPRL2	3	50387371	50388195	369.614	574	1	0	1	0	0	0	0	ENSG00000114388	6.04393	5.79334	6.05356	11.3143	14.41
451685	CYB561D2	3	50387371	50388195	369.614	574	1	0	1	0	0	0	0	ENSG00000114395	5.84618	15.5718	6.94925	6.62544	13.3318
359139	NCAPH	2	96997113	97002286	369.442	575	0	1	1	1	1	1	1	ENSG00000121152	27.4874	21.2852	14.048	0.0611294	0.315067
157542	HOXC6	12	54386487	54402006	368.825	576	0	0	1	0	1	1	0	ENSG00000197757	0.00127788	0.00165912	0.00154333	0.00169269	0.00609104
157542	HOXC9	12	54386487	54402006	368.825	576	0	0	1	0	1	1	0	ENSG00000180806	0.000400923	0.000486787	0.000424226	0.000727734	0.001711
157542	HOXC-AS1	12	54386487	54402006	368.825	576	0	0	1	0	1	1	0	ENSG00000250451	0.000268622	0.000319638	0.000232806	0.000323397	0.00125228
157542	HOXC-AS2	12	54386487	54402006	368.825	576	0	0	1	0	1	1	0	ENSG00000250133	9.52376e-07	1.0872e-06	9.9154e-07	1.31902e-06	4.80945e-06
370545	UBXN4	2	136496262	136506723	368.751	577	1	0	1	0	0	0	0	ENSG00000144224	31.0924	32.2046	32.0763	32.8124	99.7114
576273	CDK7	5	68530142	68548827	368.409	578	0	0	1	0	1	0	1	ENSG00000134058	10.7866	13.553	11.0812	7.90734	23.9203
598611	PCDHA3	5	140178618	140185893	368.2	579	0	0	1	1	0	0	0	ENSG00000255408	0.00301951	4.19167e-05	0.000108717	2.36376e-05	8.19959e-05
737341	YWHAZ	8	101965454	101968973	368.062	580	0	0	1	1	1	0	0	ENSG00000164924	102.514	262.51	260.617	141.05	450.896
737908	AZIN1	8	103868858	103879107	368.059	581	0	0	1	1	0	0	1	ENSG00000155096	38.6306	62.4848	47.8109	36.8691	85.8418
737908	KB-1507C5.2	8	103868858	103879107	368.059	581	0	0	1	1	0	0	1	#N/A	#N/A	#N/A	#N/A	#N/A	#N/A
390533	SF3B1	2	198266117	198268819	367.898	582	0	1	1	1	1	1	1	ENSG00000115524	116.648	113.862	109.995	304.617	558.387
735537	PLEKHF2	8	96137859	96147405	367.786	583	0	0	1	0	1	0	1	ENSG00000175895	14.9976	26.564	40.1249	9.29133	33.716
287130	MSL1	17	38268855	38280299	367.359	584	0	0	1	0	1	0	1	ENSG00000188895	26.6194	29.9508	24.9914	39.9828	628.212
423622	APP	21	27540932	27543573	366.938	585	0	0	1	0	1	1	0	ENSG00000142192	20.3435	70.8016	34.444	14.6417	9.13543
423622	AP000230.1	21	27540932	27543573	366.938	585	0	0	1	0	1	1	0	#N/A	#N/A	#N/A	#N/A	#N/A	#N/A
624913	TFAP2B	6	50785086	50786647	366.763	586	0	0	1	1	1	0	1	ENSG00000008196	0.000645851	0.000929948	0.000829697	0.00089867	0.00322003
151345	KIAA1551	12	32111561	32113963	366.188	587	0	1	1	1	1	1	1	ENSG00000174718	26.6472	21.5375	7.41242	91.7632	837.006
37900	IGSF8	1	160065149	160070212	365.444	588	0	0	1	0	1	0	0	ENSG00000162729	0.712464	4.20136	1.4252	7.60708	0.381357
674901	TBRG4	7	45150460	45152422	365.426	589	0	0	1	0	0	0	1	ENSG00000136270	17.6977	17.7327	11.6626	28.4654	3.37924
97090	RNU6-709P	10	115862998	115872187	364.914	590	0	0	1	1	1	0	0	ENSG00000253066	1.90488e-05	2.86798e-05	2.23309e-05	3.04757e-05	8.96467e-05
401327	SCARNA5	2	234179443	234186298	364.742	591	0	0	1	1	0	0	0	ENSG00000252010	514.746	484.835	224.08	6153.61	3300.04
401327	ATG16L1	2	234179443	234186298	364.742	591	0	0	1	1	0	0	0	ENSG00000085978	7.83209	7.23971	7.44833	21.3403	18.7878
82437	REEP3	10	65278667	65282382	364.505	592	0	0	1	1	1	0	0	ENSG00000165476	6.18328	15.0016	4.56051	2.32414	4.45675
353801	TET3	2	74221435	74234296	363.91	593	1	0	1	0	0	0	0	ENSG00000187605	14.2908	2.96819	4.62571	2.73401	34.7175
761014	DNAJA1	9	33022373	33026220	363.852	594	0	0	1	1	1	0	0	ENSG00000086061	59.6929	93.8236	41.235	22.0385	138.393
761014	APTX	9	33022373	33026220	363.852	594	0	0	1	1	1	0	0	ENSG00000137074	11.5534	13.0788	11.4222	8.00164	5.67368
622675	MRPS18A	6	43654731	43655823	363.732	595	1	0	1	0	0	0	0	ENSG00000096080	16.8539	13.1417	13.8563	8.39733	4.64084
550544	HPGD	4	175443981	175445766	363.374	596	1	0	1	0	0	0	0	ENSG00000164120	71.2303	9.19032	2.25875	1.31336	1.43121
547509	TMEM192	4	166127745	166130031	363.289	597	0	1	1	1	1	1	1	ENSG00000170088	4.27205	14.7935	4.83688	3.35337	0.797211
547509	KLHL2	4	166127745	166130031	363.289	597	0	1	1	1	1	1	1	ENSG00000109466	3.97591	16.284	6.52697	12.0316	135.058
517581	RNU6ATAC5P	4	73890735	73894224	363.005	598	0	0	1	0	1	0	0	ENSG00000210839	1.44704e-05	2.03424e-05	1.98665e-05	1.83008e-05	7.27363e-05
585671	CHD1	5	98216452	98230030	362.194	599	0	1	1	1	0	1	1	ENSG00000153922	30.4201	20.4624	20.6748	55.5774	131.845
585671	RNU6-402P	5	98216452	98230030	362.194	599	0	0	1	1	0	1	1	ENSG00000222610	2.08021e-05	2.79923e-05	2.11625e-05	3.35204e-05	0.000112186
30754	ATP5F1	1	111990420	111993325	362.042	600	0	0	1	0	1	1	1	ENSG00000116459	115.906	211.772	111.727	58.7122	47.6656
30754	WDR77	1	111990420	111993325	362.042	600	0	0	1	0	1	1	1	ENSG00000116455	7.4815	10.9663	7.8895	9.62739	1.06094
571520	SNX18	5	53812428	53818070	361.753	601	0	1	1	1	1	1	1	ENSG00000178996	1.91308	13.6299	1.15728	4.24537	144.298
262385	MYH11	16	15948167	15953184	361.563	602	0	0	1	0	1	0	0	ENSG00000133392	0.0491425	0.0373631	0.0576436	0.0193279	0.2816
218192	PRPF39	14	45552997	45558290	361.459	603	0	0	1	1	0	1	1	ENSG00000185246	10.9972	7.71428	10.5973	25.5941	3.54561
218192	CTD-3028N15.1	14	45552997	45558290	361.459	603	0	0	1	1	0	1	1	#N/A	#N/A	#N/A	#N/A	#N/A	#N/A
218192	SNORD58	14	45552997	45558290	361.459	603	0	0	1	1	0	1	1	#N/A	#N/A	#N/A	#N/A	#N/A	#N/A
227343	FOS	14	75743350	75750053	361.365	604	0	1	1	1	1	1	1	ENSG00000170345	44.2353	51.5508	60.1355	43.9791	937.091
157402	AMHR2	12	53815443	53820530	360.471	605	0	0	1	0	1	0	0	ENSG00000135409	7.83165	0.00789935	6.99545	0.0124756	0.0804838
442814	SGOL1	3	20227222	20227975	360.411	606	0	0	1	0	1	1	1	ENSG00000129810	12.492	0.419153	7.48931	0.115292	0.74554
614106	EDN1	6	12287641	12292195	359.496	607	0	0	1	1	1	0	0	ENSG00000078401	0.0130115	0.0455275	7.28646e-06	0.560987	0.82612
52416	PLXNA2	1	208411486	208418750	359.357	608	0	0	1	0	1	0	0	ENSG00000076356	1.93586	1.09656	0.0108223	0.043751	9.55845
120657	FTH1	11	61730127	61737205	357.588	609	1	0	1	0	0	0	0	ENSG00000167996	3080.54	2836.07	643.353	145.273	4889.96
120657	AP003733.1	11	61730127	61737205	357.588	609	1	0	1	0	0	0	0	#N/A	#N/A	#N/A	#N/A	#N/A	#N/A
328883	POU2F2	19	42628923	42637124	357.249	610	0	0	1	1	0	1	1	ENSG00000028277	0.511537	2.88044	0.285597	3.33947	11.2091
328883	CTC-378H22.1	19	42628923	42637124	357.249	610	0	0	1	1	0	1	1	#N/A	#N/A	#N/A	#N/A	#N/A	#N/A
610927	FOXC1	6	1607572	1615871	356.955	611	0	0	1	1	1	1	0	ENSG00000054598	3.20284e-05	0.00266166	0.0723596	3.10821e-05	0.088421
64643	LARP4B	10	975827	979074	356.295	612	0	0	1	1	0	0	1	ENSG00000107929	12.2715	17.883	13.4508	10.2277	41.8224
64643	RP11-363N22.2	10	975827	979074	356.295	612	0	0	1	1	0	0	1	#N/A	#N/A	#N/A	#N/A	#N/A	#N/A
174885	ISCU	12	108956294	108957640	356.167	613	0	0	1	0	1	1	0	ENSG00000136003	89.0585	58.4489	20.534	64.6059	97.8521
33335	ADAM30	1	120431471	120440812	355.832	614	0	0	1	1	0	0	0	ENSG00000134249	1.23657e-07	1.49582e-06	1.48249e-07	9.3562e-06	0.0140898
284411	RPL23A	17	27049991	27055527	355.659	615	0	0	1	0	1	0	0	ENSG00000198242	423.242	279.073	308.17	1142.53	15.5493
284411	TLCD1	17	27049991	27055527	355.659	615	0	0	1	0	1	0	0	ENSG00000160606	1.01887	0.41156	0.311318	0.0318845	0.0121613
284411	NEK8	17	27049991	27055527	355.659	615	0	0	1	0	1	0	0	ENSG00000160602	0.7829	1.03898	0.865636	1.50156	0.906332
284411	SNORD42A	17	27049991	27055527	355.659	615	0	0	1	0	1	0	0	ENSG00000238649	5.82232e-05	6.95351e-05	6.2334e-05	7.92354e-05	0.000278589
284411	SNORD4B	17	27049991	27055527	355.659	615	0	0	1	0	1	0	0	ENSG00000238597	5.05898e-05	6.48873e-05	5.27201e-05	6.81136e-05	0.000215944
284411	AC010761.14	17	27049991	27055527	355.659	615	0	0	1	0	1	0	0	#N/A	#N/A	#N/A	#N/A	#N/A	#N/A
375995	STAM2	2	153029517	153035454	355.509	616	0	1	1	1	1	1	1	ENSG00000115145	9.05212	13.4304	12.1352	5.09232	39.364
408599	RRBP1	20	17660712	17672229	355.496	617	0	1	1	1	1	1	1	ENSG00000125844	8.2505	26.2137	19.0977	5.04728	27.5456
643364	GTF3C6	6	111278251	111286854	355.359	618	0	0	1	1	1	0	0	ENSG00000155115	20.9714	40.5533	25.9452	10.8947	1.84019
643364	snoU13	6	111278251	111286854	355.359	618	0	1	1	1	1	0	0	#N/A	#N/A	#N/A	#N/A	#N/A	#N/A
604453	TTC1	5	159435129	159442212	355.251	619	0	0	1	0	1	1	1	ENSG00000113312	18.491	22.8762	23.1274	14.811	29.658
604453	Y_RNA	5	159435129	159442212	355.251	619	0	0	1	0	1	1	1	#N/A	#N/A	#N/A	#N/A	#N/A	#N/A
669365	AC004540.4	7	26414940	26426318	355.025	620	0	0	1	0	1	0	0	#N/A	#N/A	#N/A	#N/A	#N/A	#N/A
218142	C14orf28	14	45366137	45370009	354.979	621	0	1	1	1	1	1	1	ENSG00000179476	0.573255	0.917551	0.72698	1.82167	2.19983
218142	RP11-857B24.1	14	45366137	45370009	354.979	621	0	1	1	1	1	1	1	#N/A	#N/A	#N/A	#N/A	#N/A	#N/A
529728	EGF	4	110912987	110932476	354.432	622	1	0	1	0	0	0	0	ENSG00000138798	0.776323	0.0556864	26.3255	0.0414467	0.0740517
529728	RNU6-35P	4	110912987	110932476	354.432	622	1	0	1	0	0	0	0	ENSG00000207260	1.78804e-05	2.79316e-05	2.30409e-05	2.50625e-05	0.000106929
662831	FBXL18	7	5534637	5543676	354.341	623	0	0	1	0	1	0	0	ENSG00000155034	1.4696	1.05696	1.13632	0.540901	3.65038
662831	MIR589	7	5534637	5543676	354.341	623	0	0	1	0	1	0	0	ENSG00000207973	2.27111e-05	3.12595e-05	2.71879e-05	3.79676e-05	0.000122274
265895	TBC1D10B	16	30378870	30383429	354.321	624	0	0	1	0	1	0	0	ENSG00000169221	9.35573	9.5012	10.6449	3.10523	45.1968
265895	MYLPF	16	30378870	30383429	354.321	624	0	0	1	0	1	0	0	ENSG00000180209	0.103508	0.865947	0.612105	0.0881305	1.45808
36348	GATAD2B	1	153893802	153902760	353.863	625	0	0	1	1	1	0	0	ENSG00000143614	5.16231	2.54425	4.3394	4.5348	23.2026
236462	NIPA2	15	23032134	23036590	353.836	626	0	0	1	1	0	0	1	ENSG00000140157	17.8405	32.1322	14.743	7.98173	34.2533
469881	PLCXD2	3	111393034	111394842	353.657	627	0	1	1	1	1	1	1	ENSG00000240891	0.644756	0.171659	0.0813219	5.13561	0.800121
618902	ZKSCAN8	6	28108971	28110013	352.983	628	0	0	1	0	1	0	0	ENSG00000198315	10.0964	2.90769	8.13577	8.71094	1.80972
481487	PFN2	3	149684214	149694759	351.839	629	0	0	1	0	1	0	0	ENSG00000070087	0.0718348	0.0767311	0.0686931	3.65189	0.405433
481487	ANKUB1	3	149684214	149694759	351.839	629	0	0	1	0	1	0	0	ENSG00000206199	0.0131169	0.0301621	0.00952861	0.0127724	2.31518
481487	AC117395.1	3	149684214	149694759	351.839	629	0	0	1	0	1	0	0	#N/A	#N/A	#N/A	#N/A	#N/A	#N/A
481487	RP11-651P23.5	3	149684214	149694759	351.839	629	0	0	1	0	1	0	0	#N/A	#N/A	#N/A	#N/A	#N/A	#N/A
558294	ROPN1L	5	10439178	10442940	351.44	630	0	0	1	0	0	0	1	ENSG00000145491	0.0596828	0.0205553	0.168875	0.193304	38.803
558294	ROPN1L-AS1	5	10439178	10442940	351.44	630	0	0	1	0	0	0	1	ENSG00000250600	7.0361e-06	8.18043e-06	5.32069e-06	9.60176e-05	0.000108596
174933	CORO1C	12	109122677	109126504	351.131	631	0	0	1	0	1	0	0	ENSG00000110880	88.3626	118.361	190.267	1.14951	97.4543
493062	ADIPOQ	3	186559823	186565414	350.565	632	0	0	1	0	1	1	0	ENSG00000181092	0.000791397	0.000147609	8.82447e-05	0.000250919	0.00338296
35341	HIST2H2BE	1	149848366	149858434	350.384	633	0	0	1	0	1	0	0	ENSG00000184678	137.336	11.7148	61.9749	21.3235	202.58
735522	RNU6-1209P	8	96065826	96069786	350.365	634	0	0	1	0	1	0	0	ENSG00000200525	1.52093e-05	2.85351e-05	2.52414e-05	2.80904e-05	7.16047e-05
332882	ADI1	2	3517384	3523883	350.167	635	0	0	1	1	0	1	0	ENSG00000182551	14.0824	23.2952	15.0191	11.7543	7.86107
332882	AC142528.1	2	3517384	3523883	350.167	635	0	0	1	1	0	1	0	#N/A	#N/A	#N/A	#N/A	#N/A	#N/A
615233	MIR4639	6	16134538	16152064	349.936	636	1	0	1	0	0	0	0	ENSG00000263712	3.88625e-05	6.2308e-05	5.22607e-05	5.93875e-05	0.000208555
615233	U3	6	16134538	16152064	349.936	636	0	1	1	0	0	0	0	#N/A	#N/A	#N/A	#N/A	#N/A	#N/A
270469	SNORA46	16	58581623	58584823	349.885	637	1	0	1	0	0	0	0	ENSG00000207493	73.519	58.1605	14.2138	30.1355	154.525
476393	BFSP2	3	133115749	133123901	349.08	638	0	0	1	0	1	0	0	ENSG00000170819	0.00576344	0.011503	0.00660499	0.0115706	0.0266281
36299	ILF2	1	153636395	153649058	348.781	639	0	0	1	1	0	0	0	ENSG00000143621	71.151	51.0436	54.8967	40.236	2.45363
444614	TOP2B	3	25702828	25707043	348.695	640	0	0	1	1	0	1	0	ENSG00000077097	37.4589	30.8749	72.2739	68.4267	43.51
444614	MIR4442	3	25702828	25707043	348.695	640	0	0	1	1	0	1	0	ENSG00000264219	6.20037e-05	7.9716e-05	4.89122e-05	7.52355e-05	0.000196124
655654	PPIL4	6	149865416	149868067	348.067	641	0	1	1	0	0	1	1	ENSG00000131013	10.6007	10.5273	9.07161	15.177	16.9074
151278	METTL20	12	31799951	31800471	348.037	642	0	0	1	0	1	0	0	ENSG00000139160	0.536399	0.863149	0.364213	0.421443	0.325591
357974	KRCC1	2	88354752	88358194	347.727	643	0	0	1	0	0	1	1	ENSG00000172086	6.46213	9.82681	12.6165	9.47181	19.7483
34286	LIX1L	1	145472456	145477703	347.483	644	0	0	1	0	1	0	0	ENSG00000152022	4.55438	2.61194	7.08373	9.48359	6.0913
702808	EPHB6	7	142549777	142555606	346.999	645	0	0	1	0	1	0	0	ENSG00000106123	2.14153	1.80945	0.0468757	9.19105	3.3523
301452	PSMG2	18	12654588	12662119	346.935	646	0	0	1	1	1	0	0	ENSG00000128789	16.7596	15.1955	13.334	12.2446	4.28763
301452	SPIRE1	18	12654588	12662119	346.935	646	0	0	1	1	1	0	0	ENSG00000134278	2.60736	7.95685	2.28454	0.272151	0.168759
301452	AP005482.1	18	12654588	12662119	346.935	646	0	0	1	1	1	0	0	#N/A	#N/A	#N/A	#N/A	#N/A	#N/A
177196	SUDS3	12	118813520	118817622	346.609	647	0	1	1	1	1	1	1	ENSG00000111707	10.9816	8.48743	10.0177	8.68574	45.4234
177196	RP11-131L12.2	12	118813520	118817622	346.609	647	0	1	1	1	1	1	1	#N/A	#N/A	#N/A	#N/A	#N/A	#N/A
394357	RPE	2	210863697	210869386	346.393	648	0	1	1	1	1	1	1	ENSG00000197713	14.5851	22.9249	16.493	9.80793	1.3297
119411	TNKS1BP1	11	57081187	57092993	346.312	649	0	0	1	0	0	1	0	ENSG00000149115	7.17651	4.57906	1.83738	1.44603	0.198169
168895	DUSP6	12	89741722	89751488	346.189	650	0	0	1	1	1	0	1	ENSG00000139318	5.86357	35.5435	22.2766	0.277881	179.31
35704	CGN	1	151478606	151483209	346.141	651	0	0	1	1	0	0	0	ENSG00000143375	0.0996161	0.0158489	0.0472862	0.10591	0.0444875
383592	HOXD12	2	176961158	176967522	346.009	652	0	0	1	1	1	0	0	ENSG00000170178	5.55814e-05	7.04346e-05	6.43614e-05	6.9013e-05	0.000276398
584959	CTD-2260A17.1	5	96117403	96121726	345.71	653	0	0	1	0	1	0	0	#N/A	#N/A	#N/A	#N/A	#N/A	#N/A
776826	ABCA1	9	107684509	107694252	345.651	654	0	0	1	1	0	0	1	ENSG00000165029	0.155374	10.7025	0.0850817	1.58893	63.7468
776826	RP11-217B7.2	9	107684509	107694252	345.651	654	0	0	1	1	0	0	1	#N/A	#N/A	#N/A	#N/A	#N/A	#N/A
511697	PDGFRA	4	55094598	55103593	345.369	655	0	0	1	0	1	0	0	ENSG00000134853	0.0801804	0.841951	0.325796	0.016466	0.0659782
476528	C3orf36	3	133644417	133650381	345.217	656	0	0	1	0	1	0	0	ENSG00000221972	1.51367e-07	2.938e-07	2.82749e-07	1.22269e-06	1.10803e-06
601405	HMGXB3	5	149376555	149381828	345.206	657	1	0	1	0	0	0	0	ENSG00000113716	10.7443	13.1763	10.7483	7.7427	0.609723
601405	TIGD6	5	149376555	149381828	345.206	657	1	0	1	0	0	0	0	ENSG00000164296	1.37468	1.76144	1.43385	1.01131	0.027577
83970	CCAR1	10	70513418	70516202	344.78	658	0	0	1	0	1	0	0	ENSG00000060339	20.8511	16.2994	26.1819	28.1689	11.3273
83970	SNORD98	10	70513418	70516202	344.78	658	0	0	1	0	1	0	0	ENSG00000221182	7.23991e-05	6.79379e-05	7.1772e-05	6.08128e-05	0.000320332
29787	VAV3	1	108507083	108511712	343.193	659	0	0	1	1	1	1	0	ENSG00000134215	3.77518	4.21665	17.8277	2.55119	52.5202
760895	TOPORS	9	32524066	32553150	342.739	660	1	0	1	0	0	0	0	ENSG00000197579	19.0504	8.19958	14.2246	11.8482	82.7493
760895	TOPORS-AS1	9	32524066	32553150	342.739	660	1	0	1	0	0	0	0	ENSG00000235453	3.76126	6.72486	3.30809	11.1574	55.8421
760895	DDX58	9	32524066	32553150	342.739	660	1	0	1	0	0	0	0	ENSG00000107201	1.91542	6.83132	1.36804	10.716	98.2351
760895	AL353671.1	9	32524066	32553150	342.739	660	1	0	1	0	0	0	0	#N/A	#N/A	#N/A	#N/A	#N/A	#N/A
760895	AL353671.2	9	32524066	32553150	342.739	660	1	0	1	0	0	0	0	#N/A	#N/A	#N/A	#N/A	#N/A	#N/A
119515	CTNND1	11	57520074	57527860	342.201	661	0	0	1	0	1	0	0	ENSG00000198561	22.0652	19.5437	24.7498	3.38397	1.59704
143560	C12orf57	12	7041470	7053123	341.923	662	0	0	1	0	1	1	0	ENSG00000111678	36.2243	14.3679	98.3684	129.917	0.836551
143560	ATN1	12	7041470	7053123	341.923	662	0	0	1	0	1	1	0	ENSG00000111676	3.07767	0.999244	3.45069	0.892937	0.172361
143560	RNU7-1	12	7041470	7053123	341.923	662	0	0	1	0	1	1	0	ENSG00000238923	3.67162e-05	7.30525e-05	6.05864e-05	7.24646e-05	0.000284023
618279	HIST1H4A	6	26016682	26022602	341.788	663	0	0	1	0	0	0	1	ENSG00000196176	643.311	14.577	250.218	27.2765	3.34262
618279	HIST1H3A	6	26016682	26022602	341.788	663	0	0	1	0	0	0	1	ENSG00000198366	230.43	13.0856	66.5302	22.5644	13.2608
618279	HIST1H1A	6	26016682	26022602	341.788	663	0	0	1	0	0	0	1	ENSG00000124610	4.6218	0.266318	3.26637	0.409611	1.05482e-05
382427		2	172956858	172963112	341.66	664	0	1	1	0	1	0	0	#N/A	#N/A	#N/A	#N/A	#N/A	#N/A
145284	CDKN1B	12	12864726	12871976	341.334	665	0	0	1	0	1	1	1	ENSG00000111276	36.1864	10.9511	22.1951	87.1191	189.998
739386	ANGPT1	8	108508434	108513288	341.123	666	0	0	1	0	1	0	0	ENSG00000154188	2.365	0.0416406	74.6522	0.0377316	8.01618
282856	RAI1	17	17583162	17594137	340.801	667	0	0	1	0	0	1	0	ENSG00000108557	3.54752	2.11149	4.23799	2.99509	0.614807
520435	RASGEF1B	4	82380731	82395613	340.704	668	0	0	1	1	1	1	0	ENSG00000138670	6.44451	51.4452	1.67623	3.24506	0.106983
408974	SLC24A3	20	19191466	19199335	340.577	669	0	0	1	1	1	0	0	ENSG00000185052	0.59207	0.0560573	15.3864	8.23221e-05	0.428636
408974	RP11-97N19.2	20	19191466	19199335	340.577	669	0	0	1	1	1	0	0	#N/A	#N/A	#N/A	#N/A	#N/A	#N/A
619133	TRIM27	6	28887167	28895834	340.353	670	0	0	1	1	0	0	1	ENSG00000204713	12.0928	17.0912	10.6321	13.7	40.2384
143564	PHB2	12	7078398	7083461	340.318	671	0	0	1	0	1	0	0	ENSG00000215021	66.6759	49.2507	52.4627	53.4132	32.7655
143564	EMG1	12	7078398	7083461	340.318	671	0	0	1	0	1	0	0	ENSG00000126749	12.0974	12.6245	8.02948	13.2728	1.14451
383778	LINC01116	2	177501443	177506085	340.11	672	0	0	1	0	1	0	0	ENSG00000163364	0.100313	0.288534	0.0492296	0.0673822	2.91464
383778	LINC01117	2	177501443	177506085	340.11	672	0	0	1	0	1	0	0	ENSG00000224577	8.69406e-07	7.30796e-07	6.67869e-07	8.41519e-07	3.18673e-06
672266	SEPT7	7	35837238	35843003	339.748	673	0	0	1	0	1	0	0	ENSG00000122545	49.6609	69.4839	96.623	75.6882	149.058
672266	AC007551.3	7	35837238	35843003	339.748	673	0	0	1	0	1	0	0	#N/A	#N/A	#N/A	#N/A	#N/A	#N/A
438359	EGOT	3	4792448	4794286	339.669	674	0	0	1	1	1	0	1	ENSG00000235947	0.0152882	0.000943744	1.13528e-05	0.00111292	1.31476e-06
267603	ABCC12	16	48189744	48200897	339.57	675	0	0	1	0	1	1	0	ENSG00000140798	0.00794489	0.0100729	0.00923197	0.0110351	0.0375234
477171	PCCB	3	135959173	135969665	338.939	676	0	0	1	0	1	1	1	ENSG00000114054	23.2596	17.7783	17.1013	5.67428	1.72936
156368	DDX23	12	49242128	49247759	338.485	677	0	0	1	0	0	0	1	ENSG00000174243	30.2708	27.2159	23.6194	35.7961	43.6261
619797	SLC44A4	6	31836415	31851516	338.468	678	0	0	1	0	0	0	1	ENSG00000204385	0.00800546	0.0460965	0.0229191	0.0188214	0.0824551
546839	RP11-563E2.2	4	164028891	164030255	338.344	679	1	0	1	0	0	0	0	#N/A	#N/A	#N/A	#N/A	#N/A	#N/A
720594	AC103686.1	8	48792847	48810864	338.214	680	0	0	1	0	0	0	1	#N/A	#N/A	#N/A	#N/A	#N/A	#N/A
36352	DENND4B	1	153917401	153921883	338.185	681	0	0	1	0	1	0	0	ENSG00000198837	9.40606	16.2592	11.1272	15.0018	58.3456
17523	SRSF11	1	70701915	70704607	337.973	682	0	0	1	0	0	0	0	ENSG00000116754	70.6013	44.2578	68.6733	121.632	69.6907
592020	DTWD2	5	118320592	118325083	337.619	683	0	0	1	0	1	1	1	ENSG00000169570	1.11968	2.59157	1.70289	2.10114	0.448932
618308	HIST1H1E	6	26140695	26160512	337.603	684	0	0	1	0	0	1	1	ENSG00000168298	923.221	85.4773	680.465	245.993	76.9802
618308	HIST1H2BD	6	26140695	26160512	337.603	684	0	0	1	0	0	1	1	ENSG00000158373	858.429	53.2982	323.317	158.881	63.7975
289004	HOXB3	17	46653916	46660463	337.573	685	0	0	1	0	1	1	0	ENSG00000120093	1.27295	0.0261368	1.34026	0.644999	0.0600476
289004	HOXB4	17	46653916	46660463	337.573	685	0	0	1	0	1	1	0	ENSG00000182742	1.2283	0.00881047	1.15937	0.135224	2.19235e-06
289004	MIR10A	17	46653916	46660463	337.573	685	0	0	1	0	1	1	0	ENSG00000257178	0.0235542	3.32008e-07	0.0355169	0.000586746	9.3082e-07
495585	LSG1	3	194392913	194394494	337.569	686	0	0	1	0	1	0	0	ENSG00000041802	11.0813	12.5754	11.7207	21.7999	4.73607
223121	SIX1	14	61122629	61125454	337.141	687	0	0	1	1	1	0	0	ENSG00000126778	0.00195818	0.00798718	0.00220155	0.00268965	0.0133779
127382	RP11-164N3.2	11	87830428	87834399	336.852	688	0	0	1	1	1	0	0	#N/A	#N/A	#N/A	#N/A	#N/A	#N/A
127382	RP11-164N3.3	11	87830428	87834399	336.852	688	0	0	1	1	1	0	0	#N/A	#N/A	#N/A	#N/A	#N/A	#N/A
127382	Y_RNA	11	87830428	87834399	336.852	688	0	0	1	1	1	0	0	#N/A	#N/A	#N/A	#N/A	#N/A	#N/A
448866	CX3CR1	3	39322053	39324151	336.37	689	0	0	1	0	1	0	1	ENSG00000168329	0.292166	0.0960794	0.557542	0.114601	5.89139
210626	OR4K17	14	20583141	20586214	336.189	690	0	0	1	1	0	1	1	ENSG00000176230	3.33139e-07	4.71604e-07	3.69774e-07	5.29493e-07	1.72988e-06
597840	HNRNPA0	5	137087119	137092371	336.091	691	0	0	1	0	1	0	0	ENSG00000177733	14.9361	10.2282	21.0435	17.7737	12.6451
391665	CASP10	2	202040793	202047685	336.028	692	0	0	1	0	1	0	1	ENSG00000003400	8.99563	8.70137	5.52526	13.0193	11.5009
4713	USP48	1	22108302	22111128	335.952	693	1	0	1	0	0	0	0	ENSG00000090686	39.4216	15.881	24.1352	24.862	42.5336
673192	VPS41	7	38970151	38972072	335.499	694	0	0	1	0	1	0	0	ENSG00000006715	30.6856	52.3279	34.3804	16.5867	71.1192
445208	NEK10	3	27409028	27411081	335.431	695	0	0	1	1	1	1	0	ENSG00000163491	0.0521789	0.239947	0.0905708	0.205694	0.0521953
465624	CPOX	3	98311495	98317030	335.164	696	0	0	1	0	1	0	0	ENSG00000080819	80.8078	8.13122	26.1678	4.4356	0.38566
157386	SP7	12	53738932	53739343	334.931	697	1	0	1	0	0	0	0	ENSG00000170374	0.002635	0.00101363	0.0312343	0.00623041	0.00239475
327638	AC002511.1	19	35883528	35898310	334.188	698	0	0	1	0	0	0	1	#N/A	#N/A	#N/A	#N/A	#N/A	#N/A
759045	IFT74	9	26955931	26957234	334.009	699	0	0	1	0	1	1	0	ENSG00000096872	6.4133	3.72262	5.5933	4.91018	1.19934
759045	RP11-337A23.3	9	26955931	26957234	334.009	699	0	0	1	0	1	1	0	#N/A	#N/A	#N/A	#N/A	#N/A	#N/A
227345	RP11-293M10.4	14	75751241	75761416	333.58	700	0	0	1	0	1	1	0	#N/A	#N/A	#N/A	#N/A	#N/A	#N/A
227345	RP11-293M10.5	14	75751241	75761416	333.58	700	0	0	1	0	1	1	0	#N/A	#N/A	#N/A	#N/A	#N/A	#N/A
158141	RNF41	12	56614586	56616197	333.441	701	1	0	1	0	0	0	0	ENSG00000181852	13.6463	15.6666	20.2473	6.69995	29.5503
158141	NABP2	12	56614586	56616197	333.441	701	1	0	1	0	0	0	0	ENSG00000139579	12.385	6.21572	11.6191	2.40556	0.237698
590067	SRP19	5	112196833	112198998	332.966	702	0	0	1	0	1	1	1	ENSG00000153037	32.4852	32.9653	32.0664	22.8191	32.8733
590067	CTC-487M23.8	5	112196833	112198998	332.966	702	0	0	1	0	1	1	1	#N/A	#N/A	#N/A	#N/A	#N/A	#N/A
57826	LEFTY1	1	226098282	226100464	332.93	703	0	0	1	0	1	1	0	ENSG00000243709	0.0564759	0.00250271	1.60459	0.00135415	0.0129119
451723	MAPKAPK3	3	50646827	50651380	332.886	704	0	0	1	0	1	1	0	ENSG00000114738	23.6529	66.5834	51.2103	12.5979	95.8401
451723	CISH	3	50646827	50651380	332.886	704	0	0	1	0	1	1	0	ENSG00000114737	23.5601	3.48098	6.39944	6.30268	3.93265
10679	LINC00853	1	47642052	47645668	332.742	705	0	0	1	0	1	0	0	ENSG00000224805	0.519807	0.000590407	1.22894	8.88288e-07	2.94072e-06
10679	CYP4A22-AS1	1	47642052	47645668	332.742	705	0	0	1	0	1	0	0	ENSG00000225506	0.338838	3.47813e-05	0.476018	6.2718e-07	2.22773e-06
121592	RBM4B	11	66444372	66446168	332.521	706	0	0	1	0	1	0	0	ENSG00000173914	5.06128	3.22014	5.80117	4.23869	6.12818
150583	TMTC1	12	29669065	29673689	332.484	707	0	0	1	1	1	1	0	ENSG00000133687	0.0257098	2.25111	0.00736814	0.00723997	5.67552
150583	RP11-310I24.1	12	29669065	29673689	332.484	707	0	0	1	1	1	1	0	#N/A	#N/A	#N/A	#N/A	#N/A	#N/A
437854	CRBN	3	3219514	3227232	332.379	708	0	0	1	1	1	0	0	ENSG00000113851	18.904	17.4457	43.3465	75.2974	28.2402
157170	KRT84	12	52772817	52782324	332.23	709	0	0	1	1	0	0	0	ENSG00000161849	1.96107e-07	2.3392e-07	1.98071e-07	2.22796e-07	7.75889e-07
157170	RP3-416H24.4	12	52772817	52782324	332.23	709	0	0	1	1	0	0	0	#N/A	#N/A	#N/A	#N/A	#N/A	#N/A
275027	WDR59	16	75030728	75037016	332.097	710	0	0	1	0	1	0	0	ENSG00000103091	20.5258	4.7662	9.89873	13.0204	7.38351
275027	ZNRF1	16	75030728	75037016	332.097	710	0	0	1	0	1	0	0	ENSG00000186187	15.5349	2.2633	5.74039	0.393478	1.2536
384286	RBM45	2	178976740	178980131	331.598	711	0	0	1	0	1	0	0	ENSG00000155636	4.44057	5.48218	6.00939	5.82801	0.685607
266203	ZNF267	16	31879803	31892512	331.379	712	0	0	1	0	1	0	1	ENSG00000185947	7.65944	29.0547	15.9936	11.4931	145.647
266203	RP11-170L3.2	16	31879803	31892512	331.379	712	0	0	1	0	1	0	1	#N/A	#N/A	#N/A	#N/A	#N/A	#N/A
289007	HOXB5	17	46670497	46676324	330.545	713	0	0	1	0	1	0	0	ENSG00000120075	0.0608994	3.90082e-07	0.128744	2.30848e-07	7.5314e-07
289007	HOXB-AS3	17	46670497	46676324	330.545	713	0	0	1	0	1	0	0	ENSG00000233101	0.0355555	0.0460385	0.0490579	0.0471214	0.164076
289007	HOXB6	17	46670497	46676324	330.545	713	0	0	1	0	1	0	0	ENSG00000108511	0.0117089	0.00721542	0.085025	0.00362119	0.00627366
720607	MCM4	8	48871030	48879928	330.441	714	1	0	1	0	0	0	0	ENSG00000104738	68.2692	5.80096	29.1874	3.46119	0.874595
720607	PRKDC	8	48871030	48879928	330.441	714	1	0	1	0	0	0	0	ENSG00000253729	45.0386	15.2427	29.1822	24.6788	62.6612
590239	YTHDC2	5	112848082	112851372	330.322	715	0	0	1	0	1	1	0	ENSG00000047188	11.2139	6.42996	11.6415	18.4799	8.26863
484339	LXN	3	158387933	158392487	330.308	716	1	0	1	0	0	0	0	ENSG00000079257	154.592	9.05502	25.1823	2.44649	12.3793
596241	ACSL6	5	131346228	131348836	330.26	717	0	0	1	0	1	1	0	ENSG00000164398	13.6086	0.488266	0.116532	16.2601	8.87919
596241	AC034228.2	5	131346228	131348836	330.26	717	0	0	1	0	1	1	0	#N/A	#N/A	#N/A	#N/A	#N/A	#N/A
246876	FAM63B	15	59052950	59065239	330.213	718	0	0	1	1	1	0	0	ENSG00000128923	2.48277	3.45029	13.3431	3.84077	8.59959
246876	RP11-30K9.6	15	59052950	59065239	330.213	718	0	0	1	1	1	0	0	#N/A	#N/A	#N/A	#N/A	#N/A	#N/A
10159	UROD	1	45476778	45482664	329.619	719	0	0	1	0	1	0	1	ENSG00000126088	254.627	32.7259	110.356	18.748	10.2397
10159	HECTD3	1	45476778	45482664	329.619	719	0	0	1	0	1	0	1	ENSG00000126107	11.2406	7.53698	4.89883	3.61031	5.97909
618824	RNU7-26P	6	27864924	27865483	329.392	720	0	0	1	1	1	1	0	ENSG00000238610	8.86016e-05	8.0228e-05	8.96501e-05	6.70714e-05	0.00025138
582308	LINC00461	5	87960424	87964907	329.283	721	0	1	1	0	1	1	1	ENSG00000245526	0.0218713	0.0301458	0.0425911	0.0319345	0.113619
558248	CMBL	5	10306600	10310885	329.28	722	1	0	1	0	0	0	0	ENSG00000164237	6.26594	0.108023	1.63017	0.0824603	0.0823165
10687	TAL1	1	47687948	47692986	328.954	723	0	0	1	0	1	0	0	ENSG00000162367	116.755	0.0437186	138.098	0.0950567	0.0480069
10687	RP1-18D14.7	1	47687948	47692986	328.954	723	0	0	1	0	1	0	0	#N/A	#N/A	#N/A	#N/A	#N/A	#N/A
752193	PLGRKT	9	5426248	5442557	328.87	724	0	0	1	0	1	0	0	ENSG00000107020	8.28547	14.6897	14.8409	11.262	7.13616
720555	SPIDR	8	48635219	48654640	328.842	725	0	0	1	1	0	0	1	ENSG00000164808	8.32109	22.9308	11.0585	17.0158	25.4447
720555	CEBPD	8	48635219	48654640	328.842	725	0	0	1	1	0	0	1	ENSG00000221869	1.46016	7.58722	0.0551514	0.000228612	130.222
370368	RAB3GAP1	2	135805430	135815559	328.633	726	1	0	1	0	0	0	0	ENSG00000115839	12.6693	17.9073	14.1388	24.4881	19.5816
36354	CRTC2	1	153923538	153935288	328.278	727	1	0	1	0	0	0	0	ENSG00000160741	5.37274	4.68805	4.24729	8.77505	47.3156
424554	RWDD2B	21	30390625	30395032	328.172	728	0	0	1	0	0	1	1	ENSG00000156253	2.43257	2.68725	4.26414	1.62447	0.0310531
292530	TBX2	17	59469602	59481577	328.107	729	0	0	1	1	1	0	0	ENSG00000121068	0.00784655	0.0014582	0.00639928	0.00276625	0.0100213
292530	RP11-332H18.4	17	59469602	59481577	328.107	729	0	0	1	1	1	0	0	#N/A	#N/A	#N/A	#N/A	#N/A	#N/A
292530	RP11-332H18.5	17	59469602	59481577	328.107	729	0	0	1	1	1	0	0	#N/A	#N/A	#N/A	#N/A	#N/A	#N/A
608665	C5orf47	5	173390400	173407057	327.967	730	0	0	1	0	0	0	1	ENSG00000185056	0.0393659	0.00287037	0.00295451	0.000636545	0.151968
383589	HOXD13	2	176955985	176958775	327.099	731	0	0	1	1	1	0	0	ENSG00000128714	1.69188e-07	1.70298e-07	1.79809e-07	8.34024e-07	9.59045e-07
634408	IBTK	6	82956356	82958617	326.923	732	0	0	1	1	1	1	0	ENSG00000005700	9.44588	21.0775	12.8675	11.4909	0.687476
724625		8	61604423	61604944	326.773	733	0	1	1	0	1	1	1	#N/A	#N/A	#N/A	#N/A	#N/A	#N/A
62238	FH	1	241682071	241685450	326.716	734	0	0	1	1	1	1	0	ENSG00000091483	29.1396	51.8722	21.7866	9.12438	0.294943
204753	ABCC4	13	95951787	95955271	326.429	735	0	0	1	0	1	0	0	ENSG00000125257	47.1467	2.50994	197.971	2.78959	0.0567983
29786	VAV3	1	108497627	108507082	326.203	736	0	0	1	1	1	1	0	ENSG00000134215	3.77518	4.21665	17.8277	2.55119	52.5202
29786	VAV3-AS1	1	108497627	108507082	326.203	736	0	0	1	1	1	1	0	ENSG00000230489	0.000169099	0.000220664	0.001728	9.83343e-07	0.00961827
95976	DUSP5	10	112255134	112262944	326.151	737	0	1	1	1	1	1	1	ENSG00000138166	4.53304	6.86613	19.3344	1.64865	1.23242
95976	RP11-525A16.4	10	112255134	112262944	326.151	737	0	1	1	1	1	1	1	#N/A	#N/A	#N/A	#N/A	#N/A	#N/A
656109	AKAP12	6	151653550	151670491	325.941	738	0	0	1	0	1	0	0	ENSG00000131016	0.59541	0.0123439	0.425407	0.0605719	0.00313789
656109	snoU13	6	151653550	151670491	325.941	738	0	1	1	0	1	0	0	#N/A	#N/A	#N/A	#N/A	#N/A	#N/A
584651	AC008592.5	5	95191249	95198706	325.892	739	0	0	1	1	1	1	0	#N/A	#N/A	#N/A	#N/A	#N/A	#N/A
284211	LYRM9	17	26219311	26221623	325.452	740	0	0	1	0	1	0	0	ENSG00000232859	1.00282	2.33576	2.38725	5.93252	3.13054
284211	RP1-66C13.4	17	26219311	26221623	325.452	740	0	0	1	0	1	0	0	ENSG00000266202	1.79536e-06	2.13316e-06	4.5605e-05	0.000987492	2.03087e-05
391596	NIF3L1	2	201757574	201765917	325.436	741	0	0	1	0	1	0	1	ENSG00000196290	13.4526	8.97844	9.60362	7.74094	2.55649
391596	RNU6-762P	2	201757574	201765917	325.436	741	0	0	1	0	1	0	1	ENSG00000252916	1.99854e-05	2.87391e-05	3.17712e-05	3.34919e-05	0.000132642
258210	LYSMD4	15	100272601	100277046	325.35	742	0	0	1	0	1	1	0	ENSG00000183060	5.62811	1.60203	1.07512	4.08243	0.767889
284409	RPL23A	17	27046828	27048611	325.172	743	0	0	1	0	1	1	0	ENSG00000198242	423.242	279.073	308.17	1142.53	15.5493
284409	SNORD42B	17	27046828	27048611	325.172	743	0	0	1	0	1	1	0	ENSG00000238423	2.63488e-05	5.9535e-05	6.8938e-05	6.05784e-05	0.000242395
354253	U3	2	75852578	75861598	324.585	744	0	1	1	0	1	0	0	#N/A	#N/A	#N/A	#N/A	#N/A	#N/A
495588	FAM43A	3	194403842	194408300	324.575	745	0	0	1	0	1	0	1	ENSG00000185112	0.362493	0.879125	1.11119	0.181112	2.95159
256126	CHD2	15	93422047	93429207	324.456	746	0	0	1	0	0	1	1	ENSG00000173575	104.89	91.3419	78.3007	347.473	700.21
256126	AC013394.2	15	93422047	93429207	324.456	746	0	0	1	0	0	1	1	#N/A	#N/A	#N/A	#N/A	#N/A	#N/A
83971	CCAR1	10	70516203	70521040	324.312	747	0	0	1	0	0	0	0	ENSG00000060339	20.8511	16.2994	26.1819	28.1689	11.3273
83971	MIR1254-1	10	70516203	70521040	324.312	747	1	0	1	0	0	0	0	ENSG00000221184	3.67682e-05	3.80212e-05	0.000919009	2.77756e-05	9.839e-05
424570	CCT8	21	30444293	30454729	324.038	748	0	0	1	1	0	1	1	ENSG00000156261	76.3359	69.6116	68.5594	46.8951	5.98845
424570	MAP3K7CL	21	30444293	30454729	324.038	748	0	0	1	1	0	1	1	ENSG00000156265	0.629774	1.85906	0.44892	2.79865	0.730161
250012	MIR629	15	70369699	70379374	323.827	749	0	1	1	1	1	1	1	ENSG00000207965	2.33525e-05	2.96059e-05	2.90198e-05	4.41383e-05	0.000129784
30311	AHCYL1	1	110522706	110534653	323.231	750	0	0	1	0	1	0	1	ENSG00000168710	10.9848	30.704	15.2533	6.7525	22.6354
287335	AC004231.2	17	39072966	39081007	323.224	751	0	0	1	0	1	1	0	#N/A	#N/A	#N/A	#N/A	#N/A	#N/A
295759	SSTR2	17	71151781	71167083	322.43	752	0	0	1	1	1	0	0	ENSG00000180616	0.00368824	0.263566	0.00120147	0.000562713	0.00352007
295759	POLR3KP2	17	71151781	71167083	322.43	752	0	0	1	1	1	0	0	ENSG00000265469	1.61253e-06	2.61578e-06	7.66792e-05	2.57771e-06	9.58456e-06
295759	RP11-143K11.5	17	71151781	71167083	322.43	752	0	0	1	1	1	0	0	#N/A	#N/A	#N/A	#N/A	#N/A	#N/A
171843	SNORA53	12	98992214	98995286	322.43	753	0	0	1	1	0	1	1	ENSG00000212443	772.926	1105.55	396.925	1440.91	4349.43
171843	SLC25A3	12	98992214	98995286	322.43	753	0	1	1	1	0	1	1	ENSG00000075415	169.68	179.868	154.114	117.177	104.014
451686	NPRL2	3	50388196	50390373	322.026	754	1	0	1	0	0	0	0	ENSG00000114388	6.04393	5.79334	6.05356	11.3143	14.41
451686	CYB561D2	3	50388196	50390373	322.026	754	1	0	1	0	0	0	0	ENSG00000114395	5.84618	15.5718	6.94925	6.62544	13.3318
451686	XXcos-LUCA11.5	3	50388196	50390373	322.026	754	1	0	1	0	0	0	0	ENSG00000272104	#N/A	#N/A	#N/A	#N/A	#N/A
34283	POLR3GL	1	145451473	145470528	321.735	755	1	0	1	0	0	0	0	ENSG00000121851	10.1348	10.1486	17.8347	21.0744	8.17659
34283	ANKRD34A	1	145451473	145470528	321.735	755	1	0	1	0	0	0	0	ENSG00000181039	0.0857593	0.0402047	0.0992758	0.0991386	0.0772358
363760	SLC20A1	2	113402487	113405754	321.446	756	1	0	1	0	0	0	0	ENSG00000144136	45.9842	28.3129	24.1023	22.0239	54.62
363760	AC079922.3	2	113402487	113405754	321.446	756	1	0	1	0	0	0	0	#N/A	#N/A	#N/A	#N/A	#N/A	#N/A
340639	AC073255.1	2	30654269	30656625	321.091	757	0	0	1	0	0	1	0	#N/A	#N/A	#N/A	#N/A	#N/A	#N/A
125785	CCDC90B	11	82993065	82997864	321.016	758	0	0	1	0	1	1	0	ENSG00000137500	11.5366	18.5107	12.974	13.4287	14.0451
125785	RP11-727A23.10	11	82993065	82997864	321.016	758	0	0	1	0	1	1	0	#N/A	#N/A	#N/A	#N/A	#N/A	#N/A
260647	CARHSP1	16	8953138	8972854	320.988	759	0	0	1	0	0	1	1	ENSG00000153048	23.725	11.9904	5.77551	7.96281	32.5853
260647	RP11-77H9.6	16	8953138	8972854	320.988	759	0	0	1	0	0	1	1	#N/A	#N/A	#N/A	#N/A	#N/A	#N/A
357367	USP39	2	85837686	85864539	320.835	760	1	0	1	0	0	0	0	ENSG00000168883	22.4436	15.924	19.6521	13.8274	22.5265
357367	C2orf68	2	85837686	85864539	320.835	760	1	0	1	0	0	0	0	ENSG00000168887	8.35077	15.568	13.7389	14.0239	41.0009
289575	SPAG9	17	49196498	49200458	320.696	761	0	0	1	1	0	0	1	ENSG00000008294	40.3804	48.5328	24.6853	20.8137	303.411
353853	MTHFD2	2	74424144	74427500	320.155	762	0	0	1	0	0	1	0	ENSG00000065911	79.0862	67.8514	133.001	7.27828	3.71871
510661	SLC10A4	4	48484633	48489744	320.046	763	1	0	1	0	0	0	0	ENSG00000145248	0.357575	4.73355e-05	0.0877252	0.0263137	5.18628e-06
439699	RAD18	3	9004696	9010423	319.724	764	0	1	1	1	1	1	1	ENSG00000070950	10.225	4.00429	7.21963	4.89719	4.14571
576246	CTC-498J12.3	5	68431573	68432569	319.68	765	1	0	1	0	0	0	0	#N/A	#N/A	#N/A	#N/A	#N/A	#N/A
211915	STXBP6	14	25513580	25521064	319.443	766	0	0	1	1	0	0	0	ENSG00000168952	0.268905	0.0128989	0.0552821	0.00479577	0.0171978
76319	CXCL12	10	44874839	44889195	319.358	767	0	0	1	1	1	0	0	ENSG00000107562	0.0221783	0.0114953	0.11505	0.00997542	0.0294841
211257	AE000662.92	14	23021261	23030340	318.874	768	0	0	1	0	1	1	0	#N/A	#N/A	#N/A	#N/A	#N/A	#N/A
211257	AE000662.93	14	23021261	23030340	318.874	768	0	0	1	0	1	1	0	#N/A	#N/A	#N/A	#N/A	#N/A	#N/A
358108	AC104134.2	2	88836095	88845138	318.801	769	0	1	1	1	1	1	1	#N/A	#N/A	#N/A	#N/A	#N/A	#N/A
140449	RP11-890B15.2	11	130731664	130738476	318.344	770	0	0	1	0	1	0	0	#N/A	#N/A	#N/A	#N/A	#N/A	#N/A
210702	APEX1	14	20919804	20923490	317.75	771	0	0	1	0	1	0	0	ENSG00000100823	45.0554	34.6923	50.2515	28.6146	0.376607
210702	OSGEP	14	20919804	20923490	317.75	771	0	0	1	0	1	0	0	ENSG00000092094	16.4634	12.9702	51.8143	19.9364	14.4093
27567	DPH5	1	101490474	101494238	317.442	772	0	0	1	0	1	1	0	ENSG00000117543	8.05026	5.82011	8.30355	23.2583	0.30616
27567	RP11-421L21.3	1	101490474	101494238	317.442	772	0	0	1	0	1	1	0	#N/A	#N/A	#N/A	#N/A	#N/A	#N/A
676321	ZPBP	7	50160150	50161011	317.325	773	0	0	1	0	1	1	0	ENSG00000042813	0.00901053	0.00648597	0.0104101	0.0125804	0.0218054
266025	ZNF668	16	31083392	31085709	317.262	774	0	0	1	0	1	0	0	ENSG00000167394	2.338	3.51677	2.26208	1.62381	4.29818
287712	PSMC3IP	17	40723806	40730693	317.009	775	0	0	1	0	1	0	0	ENSG00000131470	5.58885	1.04535	1.70629	0.426899	2.99825
168949	POC1B	12	89917112	89920122	316.883	776	0	0	1	0	1	1	0	ENSG00000139323	10.7475	8.3551	8.81314	9.24853	26.334
168949	GALNT4	12	89917112	89920122	316.883	776	0	0	1	0	1	1	0	ENSG00000257594	3.96251	3.0909	2.73153	1.38019	10.3147
168949	POC1B-GALNT4	12	89917112	89920122	316.883	776	0	0	1	0	1	1	0	ENSG00000259075	0.90768	0.539083	0.845755	0.840824	0.959884
168949	RP11-734K2.4	12	89917112	89920122	316.883	776	0	0	1	0	1	1	0	#N/A	#N/A	#N/A	#N/A	#N/A	#N/A
727754	TRAM1	8	71518890	71522749	316.752	777	0	0	1	0	1	1	1	ENSG00000067167	31.7607	86.7421	88.5939	57.146	23.6586
727754	RP11-382J12.1	8	71518890	71522749	316.752	777	0	0	1	0	1	1	1	#N/A	#N/A	#N/A	#N/A	#N/A	#N/A
470045	C3orf52	3	111829537	111836549	316.689	778	0	0	1	1	1	1	0	ENSG00000114529	0.266165	0.0144149	6.78472	0.317835	0.0288502
470045	MIR567	3	111829537	111836549	316.689	778	0	0	1	1	1	1	0	ENSG00000207940	3.37565e-05	3.50257e-05	2.72142e-05	3.51946e-05	0.000111822
576307	MARVELD2	5	68697163	68716452	316.612	779	0	0	1	0	0	0	1	ENSG00000152939	0.834835	0.0618552	0.0514834	0.0985735	0.0245415
113136	LINC00610	11	36294527	36295470	316.597	780	1	0	1	0	0	0	0	ENSG00000196559	0.961057	1.81595	1.15983	3.69558	1.12619
140331	ADAMTS15	11	130316168	130326205	316.415	781	0	0	1	1	1	0	0	ENSG00000166106	1.29124e-05	0.0258398	5.8088e-08	8.14336e-05	2.44383e-07
36468	CHRNB2	1	154539788	154542003	316.221	782	0	0	1	0	1	0	0	ENSG00000160716	0.00716877	0.000770884	0.00992929	0.00125905	0.00154744
38324	DUSP12	1	161719355	161719971	316.123	783	1	0	1	0	0	0	0	ENSG00000081721	10.0727	10.0208	7.16093	12.8584	3.27392
752041	JAK2	9	4977624	4986440	316.024	784	0	0	1	0	1	0	0	ENSG00000096968	21.5285	19.638	22.784	6.37311	61.3087
10423	PIK3R3	1	46641231	46646646	315.897	785	0	0	1	1	1	0	0	ENSG00000117461	2.71931	0.370192	1.20206	0.063487	0.0589064
10423	RP11-322N21.2	1	46641231	46646646	315.897	785	0	0	1	1	1	0	0	ENSG00000250719	1.26352e-06	1.76117e-06	2.22459e-06	2.11404e-06	6.04453e-06
694169	FOXP2	7	113722909	113730629	315.793	786	0	0	1	0	1	0	0	ENSG00000128573	0.0330969	0.0406701	0.0312498	0.0192917	0.0730358
618301	HIST1H4C	6	26097561	26107989	315.618	787	0	0	1	1	0	0	0	ENSG00000197061	948.673	30.9974	321.193	60.1054	27.9149
492452	EPHB3	3	184275459	184280993	315.4	788	0	0	1	1	1	0	0	ENSG00000182580	0.116744	0.00726524	0.0005912	0.032531	0.0505719
779249	CDC26	9	116036644	116041342	315.282	789	0	0	1	0	1	0	0	ENSG00000176386	13.3208	12.645	13.9159	15.8124	24.9415
779249	PRPF4	9	116036644	116041342	315.282	789	0	0	1	0	1	0	0	ENSG00000136875	6.07562	7.2939	4.68269	4.28258	6.47079
8994	SMAP2	1	40808519	40817618	314.83	790	0	0	1	0	0	0	1	ENSG00000084070	28.4197	27.8157	14.8425	72.977	917.423
30262	EPS8L3	1	110305446	110308195	314.528	791	0	0	1	1	1	0	0	ENSG00000198758	0.0270809	0.0185036	0.0157451	0.0274271	0.0663153
609538	MXD3	5	176735949	176746539	314.199	792	0	0	1	0	1	0	0	ENSG00000213347	13.6595	2.10272	6.82251	1.37502	153.722
67846	RP11-186N15.3	10	12288804	12297437	314.178	793	0	0	1	1	1	1	0	#N/A	#N/A	#N/A	#N/A	#N/A	#N/A
474205	OSBPL11	3	125303416	125315055	314.048	794	0	0	1	0	1	0	0	ENSG00000144909	6.37325	27.2424	2.60285	3.1614	53.8633
174419	C12orf23	12	107345304	107351989	313.846	795	0	0	1	0	1	1	0	ENSG00000151135	4.33347	3.53032	16.4325	14.9379	0.375889
174419	RP11-412D9.4	12	107345304	107351989	313.846	795	0	0	1	0	1	1	0	#N/A	#N/A	#N/A	#N/A	#N/A	#N/A
284410	SNORD4A	17	27048612	27049990	313.397	796	1	0	1	0	0	0	0	ENSG00000238578	5.44961e-05	6.50168e-05	4.69583e-05	6.11628e-05	0.000228311
284410	AC010761.8	17	27048612	27049990	313.397	796	1	0	1	0	0	0	0	#N/A	#N/A	#N/A	#N/A	#N/A	#N/A
397070	CTDSP1	2	219261830	219266623	313.379	797	0	0	1	0	1	1	1	ENSG00000144579	20.5706	26.1348	52.9383	27.1063	148.943
397070	RP11-378A13.2	2	219261830	219266623	313.379	797	0	0	1	0	1	1	1	#N/A	#N/A	#N/A	#N/A	#N/A	#N/A
659809	QKI	6	163833365	163837600	313.354	798	0	1	1	1	1	1	1	ENSG00000112531	46.0008	79.2125	54.0181	15.8103	247.88
659809	CAHM	6	163833365	163837600	313.354	798	0	1	1	1	1	1	1	ENSG00000270419	#N/A	#N/A	#N/A	#N/A	#N/A
273774	SNORD111	16	70568033	70572110	313.302	799	1	0	1	0	0	0	0	ENSG00000221066	2.52015e-05	3.2742e-05	2.33805e-05	4.71234e-05	0.00014441
37831	FCRL6	1	159768852	159774121	313.255	800	0	0	1	1	1	0	0	ENSG00000181036	0.00398148	0.0919786	0.00796549	0.141669	0.0989417
268121	PAPD5	16	50175457	50189165	313.203	801	0	0	1	1	0	1	1	ENSG00000121274	3.90936	6.46907	2.09567	8.44891	10.8684
268121	RPL10P14	16	50175457	50189165	313.203	801	0	0	1	1	0	1	1	ENSG00000260031	1.68861e-06	2.77113e-06	2.59038e-06	2.90815e-06	9.57225e-06
268121	SNORA70	16	50175457	50189165	313.203	801	0	0	1	1	0	1	1	ENSG00000207165	#N/A	#N/A	#N/A	#N/A	#N/A
353832	MGC10955	2	74361314	74362538	313.035	802	1	0	1	0	0	0	0	#N/A	#N/A	#N/A	#N/A	#N/A	#N/A
284448	DHRS13	17	27229175	27234184	313.035	803	1	0	1	0	0	0	0	ENSG00000167536	25.7797	1.32179	4.39216	6.58758	83.2126
781451	MEGF9	9	123474659	123477483	312.967	804	0	0	1	0	0	1	0	ENSG00000106780	4.37597	19.254	2.69366	3.68512	268.237
36745	KIAA0907	1	155887793	155893439	312.759	805	1	0	1	0	0	0	0	ENSG00000132680	12.5781	9.45806	17.0218	20.4234	26.8295
36745	SNORA42	1	155887793	155893439	312.759	805	1	0	1	0	0	0	0	ENSG00000207475	9.49888	8.36711	2.67251	10.1348	73.2447
125718	RAB30-AS1	11	82773109	82783635	312.588	806	0	0	1	0	1	1	1	ENSG00000246067	5.75609	9.46531	7.88459	8.83498	2.54873
125718	RAB30	11	82773109	82783635	312.588	806	0	0	1	0	1	1	1	ENSG00000137502	1.0844	0.521074	10.3112	8.90521	0.20726
25519	LINC01057	1	95277745	95286959	312.548	807	0	0	1	1	1	0	1	ENSG00000224081	0.0493962	0.091052	0.0428668	0.050814	2.33836
25519	SLC44A3	1	95277745	95286959	312.548	807	0	0	1	1	1	0	1	ENSG00000143036	0.00810969	0.0119264	0.016389	0.0202449	0.175869
689404	ACN9	7	96743050	96746650	312.324	808	1	0	1	0	0	0	0	ENSG00000196636	7.82629	3.6214	7.20885	7.3857	4.09391
106364	CALCB	11	14921903	14928268	312.179	809	0	0	1	0	1	1	1	ENSG00000175868	0.0400038	0.0256371	0.00302297	0.201639	0.00303844
539485	MAML3	4	141074989	141075794	312.038	810	0	0	1	1	1	1	0	ENSG00000196782	2.50554	1.90579	15.2875	1.20231	29.2998
273737	EXOSC6	16	70278914	70288061	311.916	811	1	0	1	0	0	0	0	ENSG00000223496	12.0553	6.17934	6.80862	13.1122	1.07999
273737	RP11-296I10.6	16	70278914	70288061	311.916	811	1	0	1	0	0	0	0	#N/A	#N/A	#N/A	#N/A	#N/A	#N/A
221161	SAMD4A	14	55030009	55035267	311.892	812	0	0	1	1	1	0	0	ENSG00000020577	0.291176	3.46874	1.31026	0.176124	0.103867
756988	MLLT3	9	20620671	20623234	311.769	813	0	0	1	0	1	0	0	ENSG00000171843	55.223	0.972933	20.739	47.954	0.15957
661731	PSMB1	6	170856862	170864582	311.313	814	0	1	1	1	1	1	1	ENSG00000008018	93.5858	94.7884	89.2151	43.2199	68.5495
661731	TBP	6	170856862	170864582	311.313	814	0	1	1	1	1	1	1	ENSG00000112592	4.9873	4.06308	4.29651	5.03125	6.54413
36356	SLC39A1	1	153936971	153941439	311.017	815	1	0	1	0	0	0	0	ENSG00000143570	12.2236	35.5288	34.3707	3.75702	24.5222
36356	CREB3L4	1	153936971	153941439	311.017	815	1	0	1	0	0	0	0	ENSG00000143578	3.34419	1.96256	6.95625	1.71355	0.140541
36356	RP11-422P24.10	1	153936971	153941439	311.017	815	1	0	1	0	0	0	0	#N/A	#N/A	#N/A	#N/A	#N/A	#N/A
498732	ZNF518B	4	10457681	10462669	310.459	816	1	0	1	0	0	0	0	ENSG00000178163	9.08567	6.32518	22.2868	14.7398	15.1263
266035	FUS	16	31191436	31198086	310.228	817	0	0	1	1	1	0	1	ENSG00000089280	37.82	14.0452	35.7552	47.6548	106.276
266035	RP11-388M20.6	16	31191436	31198086	310.228	817	0	0	1	1	1	0	1	#N/A	#N/A	#N/A	#N/A	#N/A	#N/A
156485	SPATS2	12	49756726	49760546	309.728	818	0	0	1	0	1	0	0	ENSG00000123352	4.40938	3.34171	8.7824	1.61127	0.592865
649464	RPL5P21	6	130066464	130078570	309.63	819	0	0	1	0	1	0	1	ENSG00000218689	9.10378e-05	6.33167e-07	2.28837e-05	6.55285e-07	2.48861e-06
649464	Z97352.1	6	130066464	130078570	309.63	819	0	0	1	0	1	0	1	#N/A	#N/A	#N/A	#N/A	#N/A	#N/A
620927	FGD2	6	36968558	36978522	309.555	820	1	0	1	0	0	0	0	ENSG00000146192	3.43652	17.6729	0.0293633	0.130441	0.147827
398864	CUL3	2	225449065	225450853	309.422	821	1	0	1	0	0	0	0	ENSG00000036257	25.8399	24.2219	28.7382	27.0924	119.292
6956	TXLNA	1	32642437	32645826	309.106	822	1	0	1	0	0	0	0	ENSG00000084652	10.5884	13.3369	19.3115	6.08515	3.72312
493316	SST	3	187386645	187390966	308.957	823	0	0	1	1	1	0	0	ENSG00000157005	9.6089e-07	8.31862e-07	8.25393e-07	3.48382e-06	4.11289e-06
263896	PDZD9	16	22009190	22013811	308.585	824	0	0	1	0	1	1	0	ENSG00000155714	0.000847986	0.00123952	0.00090035	0.00145992	0.0054902
263896	CTD-2649C14.1	16	22009190	22013811	308.585	824	0	0	1	0	1	1	0	#N/A	#N/A	#N/A	#N/A	#N/A	#N/A
397049	TMBIM1	2	219135861	219159967	308.023	825	0	0	1	0	0	0	1	ENSG00000135926	102.642	124.807	192.36	19.9471	97.392
397049	PNKD	2	219135861	219159967	308.023	825	0	0	1	0	0	0	1	ENSG00000127838	13.404	24.3612	28.8161	8.57631	5.31949
156888	LETMD1	12	51438621	51442824	307.164	826	0	0	1	0	1	0	0	ENSG00000050426	17.7311	13.831	17.2979	34.109	9.07668
7709	SFPQ	1	35656943	35666673	307.027	827	1	0	1	0	0	0	0	ENSG00000116560	139.264	70.6218	164.502	199.915	115.853
7709	Y_RNA	1	35656943	35666673	307.027	827	0	0	1	0	0	0	0	#N/A	#N/A	#N/A	#N/A	#N/A	#N/A
713674	XPO7	8	21776974	21779990	306.811	828	1	0	1	0	0	0	0	ENSG00000130227	135.848	9.7501	17.8721	10.1503	14.3552
226749	snoU13	14	73368080	73384529	306.544	829	0	1	1	1	1	1	0	#N/A	#N/A	#N/A	#N/A	#N/A	#N/A
56956	FAM177B	1	222909496	222912566	306.384	830	0	0	1	0	1	0	0	ENSG00000197520	0.0457748	0.00971778	0.0252366	0.0412676	0.294674
714642	CDCA2	8	25313226	25318048	305.914	831	0	0	1	0	0	1	1	ENSG00000184661	16.6448	0.393945	9.67837	0.0391523	0.131581
714642	KCTD9	8	25313226	25318048	305.914	831	0	0	1	0	0	1	1	ENSG00000104756	11.5985	11.3187	11.2229	5.66498	8.40407
635496	SNX14	6	86302839	86305053	305.865	832	0	0	1	1	0	1	0	ENSG00000135317	17.3636	38.5978	36.3834	24.7224	37.0184
259591	GLYR1	16	4896332	4902451	305.301	833	0	0	1	0	1	0	0	ENSG00000140632	29.1877	24.3588	26.3337	19.5326	65.8771
259591	UBN1	16	4896332	4902451	305.301	833	0	0	1	0	1	0	0	ENSG00000118900	12.1232	8.45105	10.7857	8.3575	204.968
253535	BTBD1	15	83722766	83736752	305.181	834	0	0	1	0	1	0	0	ENSG00000064726	19.264	35.6207	30.4471	15.644	10.8934
253535	MIR4515	15	83722766	83736752	305.181	834	0	0	1	0	1	0	0	ENSG00000263643	2.47507e-05	4.35895e-05	3.48811e-05	4.83096e-05	0.000196592
266026	ZNF646	16	31085710	31087386	304.568	835	0	0	1	1	1	0	0	ENSG00000167395	5.13148	5.2136	3.88925	3.40956	34.0652
331309	TMEM86B	19	55738449	55744213	304.221	836	1	0	1	0	0	0	0	ENSG00000180089	3.13021	0.744744	1.74575	2.1294	9.76413
331309	AC010327.2	19	55738449	55744213	304.221	836	1	0	1	0	0	0	0	#N/A	#N/A	#N/A	#N/A	#N/A	#N/A
700768	RNU6-1154P	7	135347649	135356020	304.214	837	0	0	1	0	0	0	1	ENSG00000212303	1.64324e-05	3.2267e-05	2.64336e-05	3.11919e-05	0.000104381
42095	CENPL	1	173793708	173796178	304.058	838	0	0	1	0	1	1	0	ENSG00000120334	11.8353	2.43221	7.54383	2.25222	0.780202
42095	DARS2	1	173793708	173796178	304.058	838	0	0	1	0	1	1	0	ENSG00000117593	7.90467	7.18127	6.91775	1.91477	1.09562
348163	RNU6-433P	2	55241156	55243362	304.01	839	0	1	1	1	1	1	1	ENSG00000200086	3.33966e-05	2.78046e-05	1.63142e-05	3.30184e-05	8.86471e-05
598613	PCDHA5	5	140197662	140211435	303.999	840	1	0	1	0	0	0	0	ENSG00000204965	0.000504867	0.000149091	0.000123752	0.000128118	0.000430003
598613	PCDHA6	5	140197662	140211435	303.999	840	1	0	1	0	0	0	0	ENSG00000081842	0.000171485	2.75445e-05	1.81415e-05	6.16005e-05	7.64007e-05
394140	MAP2	2	210285850	210289936	303.983	841	0	0	1	0	1	0	0	ENSG00000078018	0.18865	0.0583233	1.40845	0.127681	0.0844008
38191	NDUFS2	1	161164079	161175399	303.527	842	0	0	1	0	1	0	0	ENSG00000158864	22.3959	35.8923	26.6258	23.105	34.4074
38191	ADAMTS4	1	161164079	161175399	303.527	842	0	0	1	0	1	0	0	ENSG00000158859	0.013454	0.00258687	0.0367994	0.260973	0.0274214
598687	PCDHB5	5	140510272	140526351	303.351	843	0	0	1	0	0	0	1	ENSG00000113209	1.41629e-07	5.58557e-06	1.2022e-07	0.0435835	6.55179e-07
143501	CHD4	12	6685050	6692987	302.958	844	0	0	1	0	0	0	0	ENSG00000111642	50.99	48.8787	109.873	35.2499	141.834
143501	SCARNA11	12	6685050	6692987	302.958	844	1	0	1	0	0	0	0	ENSG00000251898	11.9117	17.1283	6.51452	7.01235	83.659
143501	RP5-940J5.6	12	6685050	6692987	302.958	844	1	0	1	0	0	0	0	#N/A	#N/A	#N/A	#N/A	#N/A	#N/A
452582	ACTR8	3	53915522	53924632	302.866	845	1	0	1	0	0	0	0	ENSG00000113812	7.45451	10.8138	13.0945	8.00728	8.68661
452582	AC012467.1	3	53915522	53924632	302.866	845	1	0	1	0	0	0	0	#N/A	#N/A	#N/A	#N/A	#N/A	#N/A
162061	NUP107	12	69076409	69082720	302.661	846	0	0	1	0	1	0	0	ENSG00000111581	30.8366	14.983	24.8748	21.7375	6.77115
162061	RPL7P42	12	69076409	69082720	302.661	846	0	0	1	0	1	0	0	ENSG00000241825	4.81285e-07	7.49516e-07	0.0215237	0.063158	0.00100983
162061	RP11-637A17.2	12	69076409	69082720	302.661	846	0	0	1	0	1	0	0	#N/A	#N/A	#N/A	#N/A	#N/A	#N/A
476281	TMEM108	3	132753821	132759574	302.589	847	0	0	1	0	1	0	0	ENSG00000144868	0.0697564	0.0107798	0.930278	0.0128431	0.045479
476281	RP11-469L4.1	3	132753821	132759574	302.589	847	0	0	1	0	1	0	0	#N/A	#N/A	#N/A	#N/A	#N/A	#N/A
492451	EIF2B5-AS1	3	184268513	184275458	302.52	848	0	0	1	1	1	0	0	ENSG00000230215	8.85197e-07	3.23008e-05	3.54918e-05	3.8435e-06	0.00242128
190401	DLEU2	13	50653452	50659185	302.515	849	0	0	1	0	1	0	0	ENSG00000231607	17.4868	5.41024	8.76418	2.69776	44.1064
190401	DLEU1	13	50653452	50659185	302.515	849	0	0	1	0	1	0	0	ENSG00000176124	8.06976	1.02102	5.95218	4.2303	2.53878
211724	KHNYN	14	24894613	24899591	302.028	850	0	0	1	0	0	1	1	ENSG00000100441	19.2941	21.0885	12.8481	29.3824	80.2406
211724	CBLN3	14	24894613	24899591	302.028	850	0	0	1	0	0	1	1	ENSG00000139899	0.259461	0.609922	0.0617515	0.202988	0.47051
22152	SAMD13	1	84761608	84768396	302.009	851	0	0	1	0	1	0	0	ENSG00000203943	0.595991	0.515819	0.721179	0.114732	0.0455332
76912	SYT15	10	46967018	46977773	301.716	852	1	0	1	0	0	0	0	ENSG00000204176	0.440419	0.296413	0.581743	0.289279	0.212419
331314	PPP6R1	19	55766765	55794658	301.689	853	1	0	1	0	0	0	0	ENSG00000105063	24.3374	15.4167	39.5079	20.3801	60.5911
331314	HSPBP1	19	55766765	55794658	301.689	853	1	0	1	0	0	0	0	ENSG00000133265	6.58361	4.52718	3.08183	2.28241	0.0706919
331314	BRSK1	19	55766765	55794658	301.689	853	0	0	1	0	0	0	0	ENSG00000160469	0.100877	0.0213147	1.23429	0.344862	0.0324055
469882	PLCXD2-AS1	3	111394843	111397234	301.231	854	1	0	1	0	0	0	0	ENSG00000240766	8.81619e-07	1.35686e-06	1.2068e-06	5.0516e-06	4.12748e-06
771447	NAA35	9	88551457	88557085	301.061	855	0	0	1	0	0	1	1	ENSG00000135040	6.60782	6.18782	7.6655	7.90288	2.34173
265913	DCTPP1	16	30440360	30451490	301.041	856	0	0	1	0	1	0	0	ENSG00000179958	11.1053	8.62864	9.6676	2.9465	0.455143
238580	FAN1	15	31195054	31196911	300.979	857	0	0	1	0	1	0	0	ENSG00000198690	5.10903	3.38205	7.45479	11.0608	0.194145
770863	MIR7-1	9	86582688	86585020	300.972	858	0	0	1	0	0	1	1	ENSG00000207603	1.08315e-05	2.75802e-05	2.63279e-05	2.97653e-05	0.000103684
632171	COX7A2	6	75954895	75960734	300.918	859	0	0	1	1	0	1	1	ENSG00000112695	99.5703	132.554	150.256	72.4329	53.6419
30230	AMPD2	1	110166949	110184247	300.763	860	0	0	1	0	1	0	0	ENSG00000116337	7.91879	27.873	26.424	11.0837	962.527
30230	RP5-1160K1.6	1	110166949	110184247	300.763	860	0	0	1	0	1	0	0	#N/A	#N/A	#N/A	#N/A	#N/A	#N/A
17514	SRSF11	1	70686109	70688832	300.476	861	0	0	1	0	0	1	0	ENSG00000116754	70.6013	44.2578	68.6733	121.632	69.6907
17514	RP4-677H15.4	1	70686109	70688832	300.476	861	0	0	1	0	0	1	0	#N/A	#N/A	#N/A	#N/A	#N/A	#N/A
439886	TTLL3	3	9849734	9853304	300.138	862	0	0	1	0	0	0	1	ENSG00000214021	2.33761	5.32925	10.6867	7.35824	49.5701
306723	ZNF397	18	32820132	32821580	300.009	863	0	0	1	0	1	1	0	ENSG00000186812	3.76019	3.54648	4.32666	7.97268	18.793
632265	SENP6	6	76299843	76312907	300.007	864	0	0	1	0	0	1	0	ENSG00000112701	38.7588	26.8028	44.0953	57.1162	158.214
632265	RNU6-1338P	6	76299843	76312907	300.007	864	0	0	1	0	0	1	0	ENSG00000252137	2.08125e-05	4.69779e-05	4.04757e-05	3.75513e-05	0.000147401
158096	RPS26	12	56434788	56438101	299.324	865	0	0	1	0	1	0	0	ENSG00000197728	5.1323	4.57521	4.95969	8.09091	6.03049
158096	RP11-603J24.4	12	56434788	56438101	299.324	865	0	0	1	0	1	0	0	#N/A	#N/A	#N/A	#N/A	#N/A	#N/A
689975	ARPC1A	7	98921124	98927016	299.198	866	0	0	1	1	1	0	0	ENSG00000241685	17.1569	20.9794	19.5278	9.17858	35.5809
90738	SNORA25	10	93835564	93836957	298.963	867	0	0	1	1	1	0	0	ENSG00000207112	#N/A	#N/A	#N/A	#N/A	#N/A
539223	MGARP	4	140187319	140213606	298.867	868	1	0	1	0	0	0	0	ENSG00000137463	0.101853	0.00264057	0.0520414	0.077261	6.54403e-06
623803	CD2AP	6	47444756	47446509	298.646	869	0	0	1	0	0	1	0	ENSG00000198087	26.4596	7.78913	16.1852	12.3736	0.909939
623803	RP11-385F7.1	6	47444756	47446509	298.646	869	0	0	1	0	0	1	0	#N/A	#N/A	#N/A	#N/A	#N/A	#N/A
598925	GNPDA1	5	141391682	141395935	298.454	870	0	0	1	0	1	1	0	ENSG00000113552	12.0863	19.6541	5.89285	5.6075	2.47298
277859	GSE1	16	85643567	85648711	298.401	871	1	0	1	0	0	0	0	ENSG00000131149	13.7674	5.58338	17.0248	1.47119	15.0294
674850	H2AFV	7	44884667	44891288	298.274	872	0	0	1	0	1	0	0	ENSG00000105968	93.952	37.5913	89.7095	44.1436	47.8282
674850	AC004854.4	7	44884667	44891288	298.274	872	0	0	1	0	1	0	0	#N/A	#N/A	#N/A	#N/A	#N/A	#N/A
266040	PYCARD	16	31209754	31215261	297.922	873	0	0	1	1	1	0	0	ENSG00000103490	8.32526	55.9938	3.38817	4.8614	143.295
266040	C16orf98	16	31209754	31215261	297.922	873	0	0	1	1	1	0	0	ENSG00000261359	0.214215	0.719736	0.144867	0.289912	1.10533
145343	HEBP1	12	13152284	13154056	297.804	874	0	0	1	1	1	0	0	ENSG00000013583	35.4195	8.21694	2.52765	1.42384	2.54335
145343	HTR7P1	12	13152284	13154056	297.804	874	0	0	1	1	1	0	0	ENSG00000183935	1.55673	2.04588	0.162847	0.588592	1.09189
145343	RP11-377D9.3	12	13152284	13154056	297.804	874	0	0	1	1	1	0	0	#N/A	#N/A	#N/A	#N/A	#N/A	#N/A
757377	MTAP	9	21801459	21803557	297.675	875	0	0	1	1	1	1	0	ENSG00000099810	10.6449	13.5243	9.58593	11.5374	0.207078
757377	RP11-145E5.5	9	21801459	21803557	297.675	875	0	0	1	1	1	1	0	ENSG00000264545	0.00729387	9.9734e-06	2.29226e-06	9.95613e-07	2.83127e-06
103042	NUP98	11	3817752	3820240	297.552	876	0	0	1	0	0	1	0	ENSG00000110713	29.0458	27.6841	29.0435	32.7103	186.229
103042	PGAP2	11	3817752	3820240	297.552	876	0	0	1	0	0	1	0	ENSG00000148985	4.47535	4.03121	3.21266	5.98231	6.86202
336695	AC104623.2	2	16702524	16708458	297.49	877	0	0	1	0	1	0	0	#N/A	#N/A	#N/A	#N/A	#N/A	#N/A
781509	TRAF1	9	123690134	123691855	297.433	878	0	0	1	0	0	1	1	ENSG00000056558	0.212363	8.4828	0.579606	15.6623	0.774263
745156	TRIB1	8	126433576	126445817	296.995	879	0	0	1	1	1	0	1	ENSG00000173334	1.90058	9.87431	3.73818	0.22926	195.76
52141	CD55	1	207491500	207495827	296.597	880	0	1	1	1	1	1	1	ENSG00000196352	22.8246	24.8022	58.8389	55.3177	469.763
24013	LRRC8D	1	90279894	90290448	296.562	881	0	0	1	0	1	0	0	ENSG00000171492	20.6753	13.9857	34.4449	11.6773	3.08219
24013	RP5-943J3.2	1	90279894	90290448	296.562	881	0	0	1	0	1	0	0	#N/A	#N/A	#N/A	#N/A	#N/A	#N/A
174898	SELPLG	12	109022067	109027847	296.235	882	0	0	1	0	1	0	0	ENSG00000110876	24.9792	15.9833	27.8138	44.1696	375.315
174898	RP11-689B22.2	12	109022067	109027847	296.235	882	0	0	1	0	1	0	0	#N/A	#N/A	#N/A	#N/A	#N/A	#N/A
584649	AC008592.4	5	95187970	95189230	296.077	883	0	0	1	1	1	1	0	#N/A	#N/A	#N/A	#N/A	#N/A	#N/A
686259	DMTF1	7	86779551	86783064	295.953	884	0	0	1	0	1	1	0	ENSG00000135164	24.8176	20.4726	28.8872	61.5335	59.8374
686259	AC005076.5	7	86779551	86783064	295.953	884	0	0	1	0	1	1	0	#N/A	#N/A	#N/A	#N/A	#N/A	#N/A
164467	PHLDA1	12	76424220	76432518	295.791	885	0	0	1	1	1	1	0	ENSG00000139289	0.543428	5.37009	0.358351	0.133621	0.271686
164467	RP11-290L1.2	12	76424220	76432518	295.791	885	0	0	1	1	1	1	0	#N/A	#N/A	#N/A	#N/A	#N/A	#N/A
164467	RP11-290L1.3	12	76424220	76432518	295.791	885	0	0	1	1	1	1	0	#N/A	#N/A	#N/A	#N/A	#N/A	#N/A
391613	ORC2	2	201822381	201832549	295.599	886	0	0	1	0	0	0	1	ENSG00000115942	12.574	4.87974	8.90468	16.2465	10.523
391613	AC005037.3	2	201822381	201832549	295.599	886	0	0	1	0	0	0	1	#N/A	#N/A	#N/A	#N/A	#N/A	#N/A
248874	RNU6-265P	15	66132080	66136708	295.437	887	0	0	1	0	1	0	0	ENSG00000252715	3.15045e-05	4.62425e-05	4.30253e-05	4.65369e-05	0.000206687
515855	STAP1	4	68421266	68433390	295.224	888	1	0	1	0	0	0	0	ENSG00000035720	2.96471	0.0156396	1.90733	4.67715	0.00105048
625510	TMEM14A	6	52534049	52537238	295.202	889	0	0	1	0	1	1	0	ENSG00000096092	3.20586	0.591147	3.50026	2.99517	4.40419e-05
381277	CERS6	2	169312386	169314227	295.185	890	0	0	1	0	1	1	0	ENSG00000172292	4.81569	10.8558	3.3013	9.70432	1.38032
413387	TOP1	20	39656513	39662867	294.688	891	0	0	1	0	0	1	0	ENSG00000198900	39.3779	7.66959	30.8309	6.46218	40.0651
170770	VEZT	12	95610384	95612683	294.26	892	1	0	1	0	0	0	0	ENSG00000028203	16.2202	16.1674	18.4537	14.2003	1.26863
170770	FGD6	12	95610384	95612683	294.26	892	1	0	1	0	0	0	0	ENSG00000180263	1.79549	11.671	0.418707	0.231693	0.297534
575124	CENPK	5	64857911	64859840	293.967	893	0	0	1	1	0	1	0	ENSG00000123219	26.8426	1.84985	16.181	31.6581	4.68767
575124	PPWD1	5	64857911	64859840	293.967	893	0	0	1	1	0	1	0	ENSG00000113593	15.8551	12.8914	14.834	56.8292	30.3124
3666	PADI2	1	17441219	17449501	293.82	894	0	0	1	1	1	0	1	ENSG00000117115	0.743962	3.54204	0.00310815	0.00685743	224.362
634671	DOPEY1	6	83775216	83785627	293.755	895	0	0	1	1	1	1	0	ENSG00000083097	2.66118	5.14476	3.61734	12.688	3.11993
634671	UBE3D	6	83775216	83785627	293.755	895	0	0	1	1	1	1	0	ENSG00000118420	2.2571	1.40422	1.62902	4.31509	0.127652
634671	AL139333.1	6	83775216	83785627	293.755	895	0	0	1	1	1	1	0	#N/A	#N/A	#N/A	#N/A	#N/A	#N/A
479226	AC018450.1	3	142882975	142887640	293.537	896	1	0	1	0	0	0	0	#N/A	#N/A	#N/A	#N/A	#N/A	#N/A
17782	ZRANB2	1	71546573	71549894	293.243	897	0	0	1	0	0	1	0	ENSG00000132485	24.6513	16.0639	31.4093	51.8654	19.817
17782	ZRANB2-AS2	1	71546573	71549894	293.243	897	0	0	1	0	0	1	0	ENSG00000229956	0.173832	0.199974	0.468112	0.195855	0.180757
779343	RP11-168K11.2	9	116351187	116355088	293.197	898	0	0	1	0	1	0	0	#N/A	#N/A	#N/A	#N/A	#N/A	#N/A
761974	PAX5	9	37000340	37008401	292.734	899	0	0	1	0	1	1	0	ENSG00000196092	0.0202527	0.0383855	0.0423674	0.0292772	0.0936951
761974	RP11-297B17.3	9	37000340	37008401	292.734	899	0	0	1	0	1	1	0	#N/A	#N/A	#N/A	#N/A	#N/A	#N/A
766069	FXN	9	71638992	71657203	292.624	900	0	0	1	0	1	0	0	ENSG00000165060	14.3896	3.58224	7.94641	5.74836	0.186642
452161	ALAS1	3	52222062	52234807	292.544	901	0	0	1	0	0	0	1	ENSG00000023330	7.31904	43.8575	7.98936	2.77596	22.6408
452161	ALDOAP1	3	52222062	52234807	292.544	901	0	0	1	0	0	0	1	ENSG00000242849	3.84679e-07	5.66967e-07	3.54684e-07	4.38812e-07	1.83109e-06
223420	HIF1A	14	62157240	62165850	292.542	902	0	1	1	1	1	1	1	ENSG00000100644	25.3632	72.6626	44.1196	42.0459	605.226
223420	HIF1A-AS1	14	62157240	62165850	292.542	902	0	1	1	1	1	1	1	ENSG00000258777	0.000109191	2.95609e-05	0.00110788	1.06778e-05	2.61172e-06
145190	LOH12CR1	12	12507457	12515147	292.111	903	0	0	1	0	0	0	1	ENSG00000165714	3.62844	5.6169	1.8607	4.18678	6.09724
145190	LOH12CR2	12	12507457	12515147	292.111	903	0	0	1	0	0	0	1	ENSG00000205791	0.143435	0.184332	0.167327	0.130119	1.55507
266159	ZNF720	16	31716086	31731786	291.816	904	0	0	1	1	0	0	1	ENSG00000197302	4.40784	5.62101	3.74787	8.80199	6.47196
266159	CLUHP3	16	31716086	31731786	291.816	904	0	0	1	1	0	0	1	ENSG00000131797	2.65897	0.213715	0.0862096	20.9718	0.0209223
266159	CTD-2358C21.4	16	31716086	31731786	291.816	904	0	0	1	1	0	0	1	#N/A	#N/A	#N/A	#N/A	#N/A	#N/A
301461	PSMG2	18	12701241	12703727	291.802	905	0	0	1	0	0	0	0	ENSG00000128789	16.7596	15.1955	13.334	12.2446	4.28763
301461	CEP76	18	12701241	12703727	291.802	905	1	0	1	0	0	0	0	ENSG00000101624	9.84338	2.35358	4.33894	3.19713	0.609094
44185	XPR1	1	180579784	180609122	291.617	906	1	0	1	0	0	0	0	ENSG00000143324	9.7957	9.26941	16.5754	4.49319	9.3903
526283	TRMT10A	4	100479583	100488064	291.426	907	0	0	1	0	1	1	0	ENSG00000145331	2.13811	2.16004	2.392	2.12176	2.75029
526283	MTTP	4	100479583	100488064	291.426	907	0	0	1	0	1	1	0	ENSG00000138823	0.0431164	0.0523842	0.0364905	0.0320023	0.0526952
522582	RNU6ATAC31P	4	89125833	89129500	291.393	908	0	0	1	0	1	0	0	ENSG00000221440	1.19868e-05	1.99641e-05	1.73202e-05	2.20212e-05	9.798e-05
76493	ZNF22	10	45491835	45498521	291.286	909	1	0	1	0	0	0	0	ENSG00000165512	8.35921	2.34391	9.70314	11.6441	0.0493001
76493	C10orf25	10	45491835	45498521	291.286	909	1	0	1	0	0	0	0	ENSG00000165511	0.0939032	0.16007	0.299761	0.0166923	5.97046e-07
42094	CENPL	1	173792836	173793707	291.077	910	0	0	1	0	1	1	0	ENSG00000120334	11.8353	2.43221	7.54383	2.25222	0.780202
42094	DARS2	1	173792836	173793707	291.077	910	0	0	1	0	1	1	0	ENSG00000117593	7.90467	7.18127	6.91775	1.91477	1.09562
692119	CBLL1	7	107383378	107388499	291.002	911	1	0	1	0	0	0	0	ENSG00000105879	20.7072	6.43888	8.7865	11.4187	28.0486
692119	AC002467.7	7	107383378	107388499	291.002	911	1	0	1	0	0	0	0	#N/A	#N/A	#N/A	#N/A	#N/A	#N/A
27294	TRMT13	1	100598666	100607640	290.906	912	0	0	1	0	1	0	0	ENSG00000122435	5.78709	3.25707	4.44897	11.3538	1.2184
515853	CENPC	4	68410110	68415354	290.334	913	0	0	1	0	1	1	0	ENSG00000145241	22.9475	8.73379	17.0254	32.1917	8.38739
329427	ZNF233	19	44753788	44756731	290.329	914	1	0	1	0	0	0	0	ENSG00000159915	0.344969	0.0883051	0.290346	0.073783	0.0233255
69190	VIM	10	17267901	17273494	290.199	915	0	1	1	1	1	1	1	ENSG00000026025	62.6181	1697.56	29.0709	161.544	487.558
69190	VIM-AS1	10	17267901	17273494	290.199	915	0	1	1	1	1	1	1	ENSG00000229124	0.407178	3.57014	2.15102	4.10232	24.9361
631666	SLC17A5	6	74360315	74364870	289.674	916	0	0	1	1	0	1	1	ENSG00000119899	3.07243	24.5272	12.877	3.39737	7.503
7942	TRAPPC3	1	36612957	36628346	289.384	917	0	0	1	0	0	0	1	ENSG00000054116	24.1383	32.9553	24.6781	14.6349	28.0798
7942	MAP7D1	1	36612957	36628346	289.384	917	0	0	1	0	0	0	1	ENSG00000116871	10.0459	27.6091	9.0665	24.7844	140.459
90985	CYP26A1	10	94831385	94838376	289.124	918	0	0	1	1	1	0	0	ENSG00000095596	0.00160849	0.000262214	0.000600163	0.000878499	0.0254399
157374	C12orf10	12	53692287	53702410	289.11	919	1	0	1	0	0	0	0	ENSG00000139637	9.14597	14.226	5.67273	10.7786	5.16298
157374	RP11-680A11.5	12	53692287	53702410	289.11	919	1	0	1	0	0	0	0	#N/A	#N/A	#N/A	#N/A	#N/A	#N/A
747540	WISP1	8	134198047	134211320	288.883	920	0	1	1	1	1	1	1	ENSG00000104415	0.00324849	0.00436081	0.00380915	0.00448032	0.0165146
596962	DDX46	5	134093734	134095461	288.69	921	1	0	1	0	0	0	0	ENSG00000145833	23.3377	17.1723	17.9103	23.479	26.8242
236665	MAGEL2	15	23888995	23894154	288.416	922	0	0	1	1	1	1	0	ENSG00000254585	1.43985e-07	1.88387e-07	1.60907e-07	1.7429e-07	6.80409e-07
236665	AC124309.1	15	23888995	23894154	288.416	922	0	0	1	1	1	1	0	#N/A	#N/A	#N/A	#N/A	#N/A	#N/A
669325	HNRNPA2B1	7	26238186	26246475	288.39	923	0	0	1	0	1	1	1	ENSG00000122566	167.266	131.855	175.72	124.417	199.746
669325	CBX3	7	26238186	26246475	288.39	923	0	0	1	0	1	1	1	ENSG00000122565	83.7042	59.6595	86.8787	71.8816	77.584
211676	CHMP4A	14	24677636	24683386	288.198	924	0	0	1	0	0	1	1	ENSG00000254505	16.6202	22.1318	14.5093	35.2746	17.7074
211676	TM9SF1	14	24677636	24683386	288.198	924	0	0	1	0	0	1	1	ENSG00000100926	7.59902	11.135	8.31929	3.48088	23.693
136593	PCSK7	11	117092174	117109710	288.105	925	0	0	1	0	0	0	1	ENSG00000160613	18.6928	14.3454	14.1396	59.1285	25.9871
136593	RNF214	11	117092174	117109710	288.105	925	0	0	1	0	0	0	1	ENSG00000167257	5.92967	4.0538	5.78543	5.16493	2.17585
691402	RNU6-1322P	7	104967974	104981266	287.405	926	0	0	1	0	1	1	0	ENSG00000201179	1.8713e-05	2.65744e-05	2.57287e-05	3.13831e-05	0.000101746
391595	PPIL3	2	201746450	201757573	287.34	927	0	0	1	0	0	0	1	ENSG00000240344	18.6209	19.1544	14.9499	20.1391	2.20181
391595	NIF3L1	2	201746450	201757573	287.34	927	0	0	1	0	0	0	1	ENSG00000196290	13.4526	8.97844	9.60362	7.74094	2.55649
391595	RNU6-312P	2	201746450	201757573	287.34	927	0	0	1	0	0	0	1	ENSG00000201499	1.61619e-05	2.77065e-05	2.5924e-05	8.59994e-05	8.39954e-05
280207	ACAP1	17	7253060	7256843	287.229	928	1	0	1	0	0	0	0	ENSG00000072818	8.25603	9.9889	12.677	98.6609	113.536
280207	KCTD11	17	7253060	7256843	287.229	928	1	0	1	0	0	0	0	ENSG00000213859	0.728497	1.87406	1.51237	0.399173	0.628341
44281	MR1	1	181002457	181004704	287.105	929	0	0	1	0	1	1	0	ENSG00000153029	4.99046	28.8046	10.6358	7.06113	15.7909
735493	TP53INP1	8	95960139	95964150	287.065	930	0	0	1	0	0	0	1	ENSG00000164938	12.2386	7.42598	14.6015	4.04103	83.1487
735493	RP11-347C18.3	8	95960139	95964150	287.065	930	0	0	1	0	0	0	1	#N/A	#N/A	#N/A	#N/A	#N/A	#N/A
69074	RSU1	10	16859354	16862745	287.025	931	1	0	1	0	0	0	0	ENSG00000148484	29.8334	47.7823	119.871	16.6444	16.6813
357316	RNU7-64P	2	85668901	85680701	286.628	932	1	0	1	0	0	0	0	ENSG00000252293	4.0586e-05	8.08084e-05	7.2188e-05	8.53309e-05	0.000230885
357316	RN7SL251P	2	85668901	85680701	286.628	932	1	0	1	0	0	0	0	ENSG00000244399	2.35845e-06	2.50403e-05	2.3231e-06	9.95888e-06	1.06252e-05
363798	CKAP2L	2	113521473	113525715	286.624	933	0	0	1	0	1	0	0	ENSG00000169607	18.0584	0.356212	15.4814	0.0273785	0.106576
709761	MFHAS1	8	8747455	8751522	286.307	934	0	0	1	1	0	0	0	ENSG00000147324	25.1101	12.5313	0.97578	7.27136	0.0647199
602613	MFAP3	5	153416650	153419527	286.295	935	0	0	1	0	1	1	0	ENSG00000037749	9.55867	8.95209	11.2557	6.57796	13.935
602613	FAM114A2	5	153416650	153419527	286.295	935	0	0	1	0	1	1	0	ENSG00000055147	8.38999	9.23761	10.3872	11.7817	15.2092
645021	TSPYL1	6	116596008	116602422	286.129	936	1	0	1	0	0	0	0	ENSG00000189241	13.9566	17.2608	15.683	37.4858	23.6489
645021	DSE	6	116596008	116602422	286.129	936	0	0	1	0	0	0	0	ENSG00000111817	4.79771	22.8892	3.90134	1.06993	16.0218
645021	RP1-93H18.1	6	116596008	116602422	286.129	936	1	0	1	0	0	0	0	#N/A	#N/A	#N/A	#N/A	#N/A	#N/A
157620	MIR148B	12	54726168	54731089	286.086	937	1	0	1	0	0	0	0	ENSG00000199122	2.04433e-05	3.4434e-05	2.69491e-05	3.51927e-05	9.51528e-05
158499	CTDSP2	12	58223143	58232637	285.885	938	0	0	1	1	1	1	0	ENSG00000175215	29.1051	27.27	36.783	41.8554	204.354
158499	RP11-620J15.1	12	58223143	58232637	285.885	938	0	0	1	1	1	1	0	#N/A	#N/A	#N/A	#N/A	#N/A	#N/A
644210	MARCKS	6	114177393	114181762	285.769	939	0	0	1	1	1	0	0	ENSG00000155130	1.44465	11.5853	0.422717	0.038829	145.587
287677	PTRF	17	40573100	40575763	285.683	940	0	0	1	0	1	0	0	ENSG00000177469	3.9206	0.227718	25.0855	0.0830846	0.0211281
385446	RNU6ATAC19P	2	182600183	182603469	285.655	941	0	0	1	1	1	0	0	ENSG00000221023	1.61006e-05	2.47934e-05	3.00515e-05	3.35702e-05	0.000115586
77239	RP11-463P17.3	10	48356478	48358007	285.531	942	1	0	1	0	0	0	0	#N/A	#N/A	#N/A	#N/A	#N/A	#N/A
41632	PIGC	1	172410203	172413803	285.218	943	1	0	1	0	0	0	0	ENSG00000135845	14.8015	8.77159	9.99685	16.7424	7.55055
568620	CCL28	5	43411373	43413002	284.892	944	1	0	1	0	0	0	0	ENSG00000151882	1.32047	0.377025	0.594776	5.3094	0.0180015
519482	BMP2K	4	79687235	79703204	284.838	945	1	0	1	0	0	0	0	ENSG00000138756	105.437	43.4625	98.5657	5.01555	83.4067
519482	RP11-109G23.1	4	79687235	79703204	284.838	945	1	0	1	0	0	0	0	#N/A	#N/A	#N/A	#N/A	#N/A	#N/A
519482	RP11-109G23.3	4	79687235	79703204	284.838	945	1	0	1	0	0	0	0	#N/A	#N/A	#N/A	#N/A	#N/A	#N/A
359261	CNNM3	2	97479267	97488636	284.834	946	0	0	1	0	0	0	1	ENSG00000168763	3.79473	1.29368	1.40693	5.3091	8.02423
359261	RP11-353K11.1	2	97479267	97488636	284.834	946	0	0	1	0	0	0	1	#N/A	#N/A	#N/A	#N/A	#N/A	#N/A
572099	CTC-236F12.4	5	55775787	55782118	284.798	947	0	0	1	1	1	0	1	#N/A	#N/A	#N/A	#N/A	#N/A	#N/A
116428	ARFGAP2	11	47189560	47204147	284.623	948	0	0	1	0	1	0	0	ENSG00000149182	33.1167	29.2017	37.1915	42.9858	57.4476
116428	PACSIN3	11	47189560	47204147	284.623	948	0	0	1	0	1	0	0	ENSG00000165912	0.296607	0.125023	0.231068	0.0497466	0.0510892
116428	RP11-390K5.6	11	47189560	47204147	284.623	948	0	0	1	0	1	0	0	#N/A	#N/A	#N/A	#N/A	#N/A	#N/A
292140	MIR21	17	57918051	57925439	284.529	949	0	0	1	0	1	0	0	ENSG00000199004	3.53757e-05	5.78711e-05	5.92572e-05	5.87701e-05	0.000199577
292140	RNU6-450P	17	57918051	57925439	284.529	949	0	0	1	0	1	0	0	ENSG00000201524	1.92923e-05	2.85376e-05	2.51019e-05	3.0822e-05	9.09427e-05
173578	TXNRD1	12	104607833	104613774	284.336	950	0	0	1	0	0	0	1	ENSG00000198431	52.139	103.814	50.6962	8.54034	167.048
732492	CA1	8	86290135	86296030	284.217	951	1	0	1	0	0	0	0	ENSG00000133742	3.69627	0.0665121	0.178952	0.0717613	0.262956
597940	RNU6-1148P	5	137405056	137413889	284.075	952	0	0	1	0	1	1	0	ENSG00000222924	1.61223e-05	2.99724e-05	3.22945e-05	2.77776e-05	9.46526e-05
238663	KLF13	15	31612575	31624875	283.973	953	0	0	1	0	0	0	1	ENSG00000169926	33.8585	14.7643	10.66	30.9683	70.4516
329359	ZNF155	19	44483713	44492429	283.697	954	1	0	1	0	0	0	0	ENSG00000204920	2.7393	2.48183	3.48122	2.66329	3.21205
108075	HTATIP2	11	20384160	20385808	283.64	955	0	0	1	0	0	1	0	ENSG00000109854	11.5446	36.0723	17.8469	9.82883	61.4
139060	RPUSD4	11	126077102	126082483	283.496	956	0	0	1	0	0	1	1	ENSG00000165526	9.27566	6.18642	6.08944	13.6334	0.297952
139060	FAM118B	11	126077102	126082483	283.496	956	0	0	1	0	0	1	1	ENSG00000197798	7.25807	6.87324	4.47863	1.85727	2.77773
139060	RP11-50B3.4	11	126077102	126082483	283.496	956	0	0	1	0	0	1	1	#N/A	#N/A	#N/A	#N/A	#N/A	#N/A
383599	HOXD8	2	176991718	176999629	282.935	957	0	0	1	0	1	0	0	ENSG00000175879	0.00661956	0.00197962	0.00164572	0.00387013	0.00633227
112978	FJX1	11	35636413	35644746	282.602	958	1	0	1	0	0	0	0	ENSG00000179431	0.414113	0.0542191	0.00375927	0.000223888	0.000201593
582066		5	87166014	87170724	282.534	959	0	1	1	0	0	0	0	#N/A	#N/A	#N/A	#N/A	#N/A	#N/A
704757	ZNF783	7	148958470	148962397	282.302	960	0	0	1	0	0	1	1	ENSG00000204946	1.68273	3.1537	2.7721	9.24556	0.313999
65891	TUBAL3	10	5443225	5447414	282.232	961	0	0	1	1	1	0	0	ENSG00000178462	0.284919	5.13305e-05	3.5311	0.000649361	0.000156556
618895	ZSCAN16	6	28092326	28097823	282.183	962	0	0	1	0	1	0	0	ENSG00000196812	5.98068	2.99142	2.41447	3.53222	10.2046
622243	TOMM6	6	41752785	41755424	281.837	963	1	0	1	0	0	0	0	ENSG00000214736	68.5394	89.8298	49.2678	48.7797	6.06009
622243	FRS3	6	41752785	41755424	281.837	963	1	0	1	0	0	0	0	ENSG00000137218	0.501766	0.703314	0.552324	0.976481	0.893091
590889	CCDC112	5	114629207	114637935	281.815	964	0	0	1	1	0	0	0	ENSG00000164221	4.82183	3.69518	1.39413	2.06055	3.68601
259575	ZNF500	16	4816976	4819646	281.8	965	1	0	1	0	0	0	0	ENSG00000103199	2.39197	2.14828	2.01557	4.39297	0.393154
294328	WIPI1	17	66446836	66458638	281.558	966	0	0	1	0	1	1	1	ENSG00000070540	22.743	19.8266	37.9137	0.363524	35.6764
527332	RNU7-151P	4	103755332	103758783	281.532	967	1	0	1	0	0	0	0	ENSG00000252739	9.24178e-05	9.84719e-05	7.17586e-05	9.01124e-05	0.00032991
83899	HNRNPH3	10	70090012	70097497	281.522	968	0	0	1	0	1	0	1	ENSG00000096746	28.8494	16.6248	25.109	28.0104	113.329
83899	PBLD	10	70090012	70097497	281.522	968	0	0	1	0	1	0	1	ENSG00000108187	1.11058	1.33004	3.01528	0.710667	2.84567
206993	BIVM	13	103459517	103460305	281.064	969	0	0	1	0	1	0	0	ENSG00000134897	10.3551	3.13339	18.0752	2.22349	0.0673923
206993	BIVM-ERCC5	13	103459517	103460305	281.064	969	0	0	1	0	1	0	0	ENSG00000270181	#N/A	#N/A	#N/A	#N/A	#N/A
92803	RP11-441O15.3	10	101190466	101195700	280.816	970	0	0	1	0	1	1	0	#N/A	#N/A	#N/A	#N/A	#N/A	#N/A
219824	SOS2	14	50692824	50699175	280.554	971	1	0	1	0	0	0	0	ENSG00000100485	10.8311	16.1637	13.7193	13.7398	172.295
43598	C1orf220	1	178500099	178517683	280.452	972	0	0	1	1	0	0	0	ENSG00000213057	0.302611	0.0695629	0.0774491	0.0543761	0.00129816
43598	C1ORF220	1	178500099	178517683	280.452	972	0	0	1	1	0	0	0	#N/A	#N/A	#N/A	#N/A	#N/A	#N/A
278766	AC108004.3	17	262444	263865	280.333	973	0	1	1	1	1	0	1	#N/A	#N/A	#N/A	#N/A	#N/A	#N/A
69192	VIM	10	17274482	17278643	280.312	974	0	1	1	1	1	1	1	ENSG00000026025	62.6181	1697.56	29.0709	161.544	487.558
69192	RP11-124N14.3	10	17274482	17278643	280.312	974	0	1	1	1	1	1	1	#N/A	#N/A	#N/A	#N/A	#N/A	#N/A
698602	SND1	7	127289511	127298661	280.275	975	0	0	1	0	0	0	1	ENSG00000197157	39.3712	53.7106	50.915	27.4791	6.75829
698602	AC073934.6	7	127289511	127298661	280.275	975	0	0	1	0	0	0	1	#N/A	#N/A	#N/A	#N/A	#N/A	#N/A
108736	SLC17A6	11	22354905	22362252	280.138	976	0	0	1	0	1	1	0	ENSG00000091664	4.47929e-05	0.000130136	5.8374e-05	7.05333e-05	0.000253768
108736	CTD-2140G10.2	11	22354905	22362252	280.138	976	0	0	1	0	1	1	0	#N/A	#N/A	#N/A	#N/A	#N/A	#N/A
158156	RP11-977G19.12	12	56702520	56703267	279.693	977	1	0	1	0	0	0	0	#N/A	#N/A	#N/A	#N/A	#N/A	#N/A
492178	MCF2L2	3	183145678	183148424	279.618	978	1	0	1	0	0	0	0	ENSG00000053524	0.455431	0.0449346	0.213397	0.32924	0.178771
176772	MAP1LC3B2	12	116983349	117002224	279.395	979	0	0	1	0	0	0	1	ENSG00000171471	0.460838	0.195716	0.21207	0.00076332	3.08797
176772	RP11-809C9.2	12	116983349	117002224	279.395	979	0	0	1	0	0	0	1	#N/A	#N/A	#N/A	#N/A	#N/A	#N/A
676327	AC020743.2	7	50175558	50188164	279.273	980	0	0	1	0	1	1	0	#N/A	#N/A	#N/A	#N/A	#N/A	#N/A
609536	PRELID1	5	176723335	176731589	279.247	981	1	0	1	0	0	0	0	ENSG00000169230	34.8947	64.8079	31.4596	15.3641	173.096
609536	RAB24	5	176723335	176731589	279.247	981	1	0	1	0	0	0	0	ENSG00000169228	9.41632	14.9295	11.5269	5.90732	177.561
96001	snoU13	10	112331271	112337328	279.079	982	0	1	1	1	1	0	1	#N/A	#N/A	#N/A	#N/A	#N/A	#N/A
455649	RP11-245J9.4	3	63996744	63998366	279.039	983	0	0	1	0	1	1	0	#N/A	#N/A	#N/A	#N/A	#N/A	#N/A
518002	EPGN	4	75173029	75175266	278.538	984	0	0	1	0	1	0	0	ENSG00000182585	0.0827637	0.0495555	0.55859	0.301926	0.110239
265939	ZNF689	16	30617309	30624307	277.313	985	1	0	1	0	0	0	0	ENSG00000156853	3.2146	1.78793	4.61099	4.12793	0.430673
6639	MATN1-AS1	1	31193344	31205317	277.199	986	0	0	1	0	1	0	0	ENSG00000186056	1.00197	0.323608	0.168036	3.06749	0.437859
6639	MATN1	1	31193344	31205317	277.199	986	0	0	1	0	1	0	0	ENSG00000162510	0.144566	0.00371094	0.00315293	0.202208	0.166579
495923	SLC51A	3	195921412	195943608	277.101	987	1	0	1	0	0	0	0	ENSG00000163959	0.0468637	0.0703187	0.0326412	0.0306462	2.94516
495923	ZDHHC19	3	195921412	195943608	277.101	987	1	0	1	0	0	0	0	ENSG00000163958	0.0122473	0.220538	0.00535472	0.0124172	4.92144
495923	Y_RNA	3	195921412	195943608	277.101	987	0	0	1	0	0	0	0	#N/A	#N/A	#N/A	#N/A	#N/A	#N/A
404738	GPCPD1	20	5585992	5601172	277.068	988	0	0	1	1	0	1	0	ENSG00000125772	49.0259	33.7949	13.296	27.6217	272.544
201879	SLITRK6	13	86370433	86375418	276.695	989	0	0	1	0	1	0	0	ENSG00000184564	0.0169374	1.02603e-07	9.94604e-08	9.4391e-08	5.28007e-07
370493	R3HDM1	2	136288942	136292335	276.484	990	1	0	1	0	0	0	0	ENSG00000048991	8.10628	4.18441	9.15866	14.1605	11.3301
446850	CMTM6	3	32542699	32548841	276.454	991	0	0	1	0	1	0	0	ENSG00000091317	13.1079	82.0926	110.215	13.6045	270.118
218201	PRPF39	14	45578653	45584197	276.139	992	0	0	1	0	0	0	1	ENSG00000185246	10.9972	7.71428	10.5973	25.5941	3.54561
218201	SNORD127	14	45578653	45584197	276.139	992	0	0	1	0	0	0	1	ENSG00000239043	4.39086e-05	7.07817e-05	4.26067e-05	4.92819e-05	0.000156975
158419	INHBE	12	57847046	57863106	275.905	993	0	0	1	0	0	0	0	ENSG00000139269	0.0272184	0.00889375	0.0380306	0.00212146	0.00453555
158419	GLI1	12	57847046	57863106	275.905	993	1	0	1	0	0	0	0	ENSG00000111087	0.0257123	0.0761232	0.0262327	0.0768501	0.403599
181182	ZMYM5	13	20435843	20439495	275.703	994	1	0	1	0	0	0	0	ENSG00000132950	9.4882	5.44212	9.66628	13.0469	18.4509
93924	SFR1	10	105879858	105883772	275.524	995	0	0	1	0	1	1	1	ENSG00000156384	8.45767	4.35177	3.82882	4.46344	3.39154
503494	PI4K2B	4	25160051	25163012	275.512	996	1	0	1	0	0	0	0	ENSG00000038210	11.769	11.6347	14.6265	8.27868	4.657
503494	SEPSECS	4	25160051	25163012	275.512	996	1	0	1	0	0	0	0	ENSG00000109618	5.50812	6.99731	7.0244	7.41802	3.25918
8310	CDCA8	1	38156332	38160858	275.507	997	0	0	1	0	0	1	0	ENSG00000134690	17.5823	0.472357	10.342	0.125355	0.746092
8310	C1orf109	1	38156332	38160858	275.507	997	0	0	1	0	0	1	0	ENSG00000116922	15.2891	4.56112	4.68555	5.91036	0.571018
265440	GSG1L	16	28071437	28079494	275.461	998	0	0	1	1	1	0	0	ENSG00000169181	0.00516621	0.0227503	0.00253234	0.00265667	0.15174
662834	ACTB	7	5545104	5573854	275.461	999	0	0	1	0	0	0	0	ENSG00000075624	754.99	2118.12	2748.17	462.405	3852.97
662834	FBXL18	7	5545104	5573854	275.461	999	0	0	1	0	0	0	0	ENSG00000155034	1.4696	1.05696	1.13632	0.540901	3.65038
662834	AC006483.1	7	5545104	5573854	275.461	999	1	0	1	0	0	0	0	#N/A	#N/A	#N/A	#N/A	#N/A	#N/A
457217	ARL6IP5	3	69133242	69148659	275.199	1000	0	0	1	0	0	0	1	ENSG00000144746	31.2409	89.2442	82.1374	64.2559	59.3373
705599	ACTR3B	7	152450889	152457916	274.988	1001	0	0	1	0	1	0	0	ENSG00000133627	1.85001	1.06455	4.19	2.14475	1.8216
705599	RN7SL845P	7	152450889	152457916	274.988	1001	0	0	1	0	1	0	0	ENSG00000244328	3.89154e-06	4.82882e-06	1.83102e-06	3.46817e-06	1.30177e-05
10555	EFCAB14	1	47183266	47194316	274.847	1002	1	0	1	0	0	0	0	ENSG00000159658	17.4172	31.9644	20.7823	22.2989	32.8744
761089	NFX1	9	33286962	33293011	274.76	1003	0	0	1	0	1	0	0	ENSG00000086102	11.7396	8.39079	20.9583	13.1565	6.39149
140184	NFRKB	11	129762164	129769539	274.68	1004	1	0	1	0	0	0	0	ENSG00000170322	4.36016	5.76362	5.18469	14.772	16.0218
469913	PLCXD2	3	111447382	111452118	274.662	1005	0	1	1	1	1	0	0	ENSG00000240891	0.644756	0.171659	0.0813219	5.13561	0.800121
469913	PHLDB2	3	111447382	111452118	274.662	1005	0	0	1	1	1	0	0	ENSG00000144824	0.0220097	0.0240744	0.015634	0.317649	0.0957037
329482	ZNF229	19	44947526	44958886	274.448	1006	1	0	1	0	0	0	0	ENSG00000167383	1.25386	0.317297	0.539416	0.46043	0.0103423
329482	CTC-512J12.4	19	44947526	44958886	274.448	1006	1	0	1	0	0	0	0	#N/A	#N/A	#N/A	#N/A	#N/A	#N/A
581857	RASA1	5	86559609	86565202	274.045	1007	0	1	1	1	1	1	1	ENSG00000145715	10.9161	15.4402	32.1237	12.9643	14.9518
328917	PAFAH1B3	19	42783123	42809789	274.028	1008	0	0	1	0	0	1	1	ENSG00000079462	17.6046	4.64725	6.97801	4.34891	0.932546
328917	CIC	19	42783123	42809789	274.028	1008	0	0	1	0	0	1	1	ENSG00000079432	8.2458	3.97351	7.11112	5.27815	50.4815
328917	PRR19	19	42783123	42809789	274.028	1008	0	0	1	0	0	1	1	ENSG00000188368	0.352137	0.0754539	0.103153	0.019927	0.0189832
590982	TMED7	5	114956787	114966357	273.984	1009	0	0	1	1	0	1	0	ENSG00000134970	18.7917	38.8887	28.4953	15.9604	23.0599
590982	TICAM2	5	114956787	114966357	273.984	1009	0	1	1	1	0	1	0	ENSG00000243414	1.62102	3.47452	0.396675	0.031411	2.80412
590982	TMED7-TICAM2	5	114956787	114966357	273.984	1009	0	0	1	1	0	1	0	ENSG00000251201	0.961406	1.6446	0.782582	0.457496	1.31298
451972	RBM15B	3	51427777	51431153	273.842	1010	1	0	1	0	0	0	0	ENSG00000179837	7.3389	6.25386	7.18046	9.41033	6.46525
327631	FFAR1	19	35842125	35844059	273.782	1011	0	0	1	1	0	0	0	ENSG00000126266	4.69942e-07	0.000271464	5.52098e-07	6.09352e-07	0.000170732
700585	AGBL3	7	134670203	134673323	273.557	1012	0	0	1	0	1	1	1	ENSG00000146856	0.344549	0.219788	1.59042	1.36358	0.117045
604427	ADRA1B	5	159341749	159345488	273.366	1013	0	0	1	1	1	0	0	ENSG00000170214	1.28942e-07	4.57383e-07	2.92937e-07	2.61379e-07	9.38927e-07
157421	MAP3K12	12	53888594	53894680	273.243	1014	1	0	1	0	0	0	0	ENSG00000139625	1.24179	3.76588	4.50713	5.53872	1.59307
36779	SEMA4A	1	156107982	156121315	273.186	1015	1	0	1	0	0	0	0	ENSG00000196189	2.19191	3.27703	2.0882	0.223691	135.756
211322	MRPL52	14	23289232	23304581	273.138	1016	0	0	1	0	1	0	0	ENSG00000172590	33.5499	38.3058	17.5009	14.724	6.08621
211322	SLC7A7	14	23289232	23304581	273.138	1016	0	0	1	0	1	0	0	ENSG00000155465	0.821787	82.8749	1.05982	0.186264	47.7189
211322	AL135998.1	14	23289232	23304581	273.138	1016	0	0	1	0	1	0	0	#N/A	#N/A	#N/A	#N/A	#N/A	#N/A
329396	ZNF234	19	44643003	44652487	272.859	1017	1	0	1	0	0	0	0	ENSG00000263002	1.99351	2.34368	3.94514	2.55115	0.385804
145278	GPR19	12	12842027	12850634	272.816	1018	0	0	1	0	1	1	0	ENSG00000183150	0.339521	0.0424866	0.340908	0.502617	2.55933
331342	ISOC2	19	55937874	55986148	272.812	1019	1	0	1	0	0	0	0	ENSG00000063241	22.5238	14.6759	5.02032	1.51708	0.0491077
331342	SHISA7	19	55937874	55986148	272.812	1019	1	0	1	0	0	0	0	ENSG00000187902	2.65197	6.40666e-05	0.00116694	3.79114e-05	8.08252e-05
707193	ESYT2	7	158614176	158626185	272.705	1020	0	0	1	0	0	1	0	ENSG00000117868	12.0905	20.968	18.4626	52.6991	24.5942
619553	ABCF1	6	30534753	30541639	272.632	1021	0	0	1	0	0	0	1	ENSG00000204574	20.7354	20.8081	14.6721	11.8441	11.3926
219747	ARF6	14	50358189	50364517	272.553	1022	0	0	1	1	0	1	0	ENSG00000165527	32.5741	33.4277	18.1724	28.6643	55.9902
216366	FBXO33	14	39897769	39905604	272.533	1023	0	0	1	0	0	1	0	ENSG00000165355	5.73002	10.5488	4.62252	19.5992	51.9792
221401	TBPL2	14	55909216	55924334	272.401	1024	0	0	1	0	1	0	0	ENSG00000182521	0.0244522	0.00333634	0.0085186	0.000352323	0.23
189312	LRCH1	13	47126150	47129696	272.333	1025	0	0	1	0	1	1	0	ENSG00000136141	2.98673	13.1666	5.35091	4.1406	3.72868
344546	RNU6-958P	2	43635223	43635829	272.302	1026	0	0	1	1	0	0	0	ENSG00000252804	1.64925e-05	2.61776e-05	2.91016e-05	2.71351e-05	0.000105574
596014	HINT1	5	130496607	130508491	272.287	1027	0	0	1	0	0	1	0	ENSG00000169567	101.29	88.756	62.469	119.134	12.0392
596014	LYRM7	5	130496607	130508491	272.287	1027	0	0	1	0	0	1	0	ENSG00000186687	6.87172	2.60497	3.29245	5.74391	1.64284
541252	MMAA	4	146533445	146540030	272.143	1028	1	0	1	0	0	0	0	ENSG00000151611	0.769981	3.64492	1.0876	3.654	0.0486709
60335	TOMM20	1	235290218	235295119	271.311	1029	1	0	1	0	0	0	0	ENSG00000173726	29.3881	29.7415	35.4519	43.7947	7.96239
60335	SNORA14B	1	235290218	235295119	271.311	1029	1	0	1	0	0	0	0	ENSG00000207181	19.3035	15.1686	3.51336	33.1103	131.805
464199	NSUN3	3	93780765	93783302	271.095	1030	0	0	1	1	1	1	0	ENSG00000178694	14.3455	5.80095	5.31307	8.09764	17.66
464199	DHFRL1	3	93780765	93783302	271.095	1030	0	0	1	1	1	1	0	ENSG00000178700	1.57502	2.01673	1.12892	1.44681	1.19116
258731	TM2D3	15	102192119	102202549	271.014	1031	0	0	1	0	1	0	0	ENSG00000184277	11.9475	15.1741	6.19635	22.0343	72.8357
634230	FAM46A	6	82460183	82466059	270.771	1032	0	0	1	0	0	1	1	ENSG00000112773	3.37974	7.36063	1.48688	1.99044	11.0017
248450	DAPK2	15	64332257	64343033	270.639	1033	0	0	1	0	1	0	0	ENSG00000035664	0.175891	0.266011	0.983319	0.100266	95.6738
30176	SORT1	1	109931293	109941567	270.565	1034	0	0	1	0	1	0	0	ENSG00000134243	4.42457	47.4312	27.2423	0.0785595	17.5019
689902	AC004893.11	7	98610216	98611812	270.503	1035	0	0	1	1	1	0	0	#N/A	#N/A	#N/A	#N/A	#N/A	#N/A
351201	SERTAD2	2	64974412	64981589	270.491	1036	0	0	1	0	1	0	0	ENSG00000179833	8.27968	7.28296	10.874	4.00458	16.3649
210801	RNASE1	14	21268142	21275220	270.409	1037	1	0	1	0	0	0	0	ENSG00000129538	10.9264	1.72713	1.84371	0.0145372	0.0106069
625628	ICK	6	52920504	52927724	270.359	1038	1	0	1	0	0	0	0	ENSG00000112144	1.40557	2.00454	0.982558	3.87574	1.86625
93521	NFKB2	10	104152443	104157594	270.254	1039	1	0	1	0	0	0	0	ENSG00000077150	3.36277	15.4285	4.73813	8.09984	106.289
565748	DNAJC21	5	34928579	34934176	270.134	1040	0	0	1	0	0	1	0	ENSG00000168724	16.9581	13.9961	19.255	15.4488	5.93128
143497	IFFO1	12	6652529	6658367	270.08	1041	0	0	1	0	0	0	0	ENSG00000010295	2.89089	7.6463	4.1622	5.36769	10.2945
143497	RP5-940J5.8	12	6652529	6658367	270.08	1041	1	0	1	0	0	0	0	#N/A	#N/A	#N/A	#N/A	#N/A	#N/A
44742	RNASEL	1	182557133	182558476	270.079	1042	0	0	1	0	1	0	0	ENSG00000135828	2.14992	6.65796	4.42096	5.18706	29.9938
653797	RP11-436I24.1	6	143877793	143884094	270.057	1043	1	0	1	0	0	0	0	#N/A	#N/A	#N/A	#N/A	#N/A	#N/A
182165	TNFRSF19	13	24142681	24144559	270	1044	1	0	1	0	0	0	0	ENSG00000127863	3.35038	0.0226775	0.0571368	0.0327657	0.00938155
211708	NFATC4	14	24829975	24835214	269.994	1045	1	0	1	0	0	0	0	ENSG00000100968	0.948751	0.0251123	14.7103	0.048398	0.114796
84862	RNU6-805P	10	74148551	74153256	269.922	1046	1	0	1	0	0	0	0	ENSG00000202513	1.40512e-05	3.12994e-05	2.57134e-05	2.69658e-05	9.99064e-05
158345	MYO1A	12	57437981	57450059	269.812	1047	1	0	1	0	0	0	0	ENSG00000166866	0.239804	0.0813615	0.0404041	0.303917	0.136924
210632	OR4N5	14	20607982	20612778	269.317	1048	0	0	1	1	0	0	0	ENSG00000184394	4.83867e-07	9.765e-07	1.11e-05	5.72591e-07	2.19475e-06
342389	CRIM1	2	36577978	36589064	269.199	1049	0	0	1	1	1	0	0	ENSG00000150938	1.05513	2.60648	0.558843	0.394279	0.712229
342389	RP11-490M8.1	2	36577978	36589064	269.199	1049	0	0	1	1	1	0	0	#N/A	#N/A	#N/A	#N/A	#N/A	#N/A
34647	BCL9	1	147013180	147018348	269.154	1050	0	0	1	0	1	1	0	ENSG00000116128	0.811652	0.483519	0.941374	1.52765	2.08364
186072	CCNA1	13	36992917	37008543	269.086	1051	0	0	1	1	1	0	0	ENSG00000133101	0.347574	1.21564	0.0100256	0.00522058	0.0294466
783503	NTMT1	9	132368783	132383163	268.89	1052	0	1	1	1	1	1	1	ENSG00000148335	8.90514	9.58781	3.87816	8.4594	3.50441
783503	C9orf50	9	132368783	132383163	268.89	1052	0	1	1	1	1	1	1	ENSG00000179058	2.12791e-07	9.11457e-06	7.48173e-06	1.22875e-06	9.74234e-07
19936	ZZZ3	1	78141576	78151695	268.758	1053	1	0	1	0	0	0	0	ENSG00000036549	13.2452	12.5252	19.4952	30.934	1.76527
625733	AL591034.1	6	53316875	53326231	268.714	1054	0	0	1	0	0	0	1	#N/A	#N/A	#N/A	#N/A	#N/A	#N/A
320263	NFATC1	18	77153598	77162557	268.701	1055	1	0	1	0	0	0	0	ENSG00000131196	3.40193	3.32305	5.97814	6.65792	5.10797
622745	C6orf223	6	43966636	43978360	268.41	1056	1	0	1	0	0	0	0	ENSG00000181577	2.98745	0.0323895	36.8521	0.00115072	0.0103032
622745	RP5-1120P11.1	6	43966636	43978360	268.41	1056	1	0	1	0	0	0	0	#N/A	#N/A	#N/A	#N/A	#N/A	#N/A
425831	C21orf54	21	34539805	34547317	268.177	1057	0	0	1	1	0	0	0	ENSG00000229086	6.78415e-07	1.03351e-06	7.83282e-07	1.179e-06	1.49772e-05
477267	RNU7-198P	3	136347580	136353444	268.144	1058	1	0	1	0	0	0	0	ENSG00000251708	7.0098e-05	9.66909e-05	6.96647e-05	9.88503e-05	0.000274895
559400	TRIO	5	14141000	14147844	267.903	1059	0	0	1	1	1	0	0	ENSG00000038382	7.43192	26.9911	5.44147	0.880233	1.89024
529246	RPL34	4	109541262	109545003	267.893	1060	0	0	1	0	1	1	0	ENSG00000109475	615.832	514.784	446.832	2096.36	135.988
529246	RPL34-AS1	4	109541262	109545003	267.893	1060	0	0	1	0	1	1	0	ENSG00000234492	0.0967025	0.0545886	0.260198	0.788449	0.0569978
415393	ARFGEF2	20	47522906	47540091	267.794	1061	0	0	1	0	1	0	0	ENSG00000124198	11.9125	16.4236	12.5184	12.6028	1.2177
334833	RRM2	2	10261498	10264814	267.058	1062	0	1	1	1	1	1	1	ENSG00000171848	110.301	1.59613	44.611	0.14109	0.936232
278467	CBFA2T3	16	89001969	89011311	266.825	1063	0	0	1	0	1	0	0	ENSG00000129993	4.48287	0.391784	7.46889	0.0497438	19.9928
278467	RP11-830F9.6	16	89001969	89011311	266.825	1063	0	0	1	0	1	0	0	#N/A	#N/A	#N/A	#N/A	#N/A	#N/A
278467	RP11-830F9.7	16	89001969	89011311	266.825	1063	0	0	1	0	1	0	0	#N/A	#N/A	#N/A	#N/A	#N/A	#N/A
400703	RNU6-451P	2	231449529	231453355	266.798	1064	1	0	1	0	0	0	0	ENSG00000199791	2.44592e-05	3.0128e-05	2.21153e-05	3.02521e-05	9.65541e-05
83925	DNA2	10	70231684	70233905	266.797	1065	1	0	1	0	0	0	0	ENSG00000138346	10.9948	1.76234	6.42626	1.52659	2.48142
380116	COBLL1	2	165699930	165700496	266.58	1066	1	0	1	0	0	0	0	ENSG00000082438	10.2998	0.27078	0.343405	0.254107	0.203634
643367	RPF2	6	111293728	111303690	266.261	1067	0	0	1	0	1	0	0	ENSG00000197498	10.5972	9.52797	6.88556	4.27859	0.029011
70726	DNAJC1	10	22290008	22296936	266.032	1068	0	0	1	0	1	1	0	ENSG00000136770	9.47431	10.9526	10.2588	4.39675	4.81651
124137	INTS4	11	77702052	77707865	265.666	1069	0	0	1	0	1	1	0	ENSG00000149262	9.86392	12.8401	9.98726	20.1323	17.9142
213914	HECTD1	14	31675473	31680385	265.54	1070	0	0	1	1	0	0	0	ENSG00000092148	54.6451	53.7479	51.9899	43.0823	37.7837
648111	NCOA7	6	126100132	126102426	265.44	1071	1	0	1	0	0	0	0	ENSG00000111912	16.1562	9.00903	20.1009	10.8561	7.18249
305660	TRAPPC8	18	29521798	29534636	265.207	1072	0	0	1	0	1	1	1	ENSG00000153339	15.182	21.7858	11.3889	17.9422	71.7911
305660	RP11-326K13.4	18	29521798	29534636	265.207	1072	0	0	1	0	1	1	1	#N/A	#N/A	#N/A	#N/A	#N/A	#N/A
391408	SPATS2L	2	201169640	201173823	265.068	1073	1	0	1	0	0	0	0	ENSG00000196141	0.816609	11.6008	0.722209	0.625229	0.764237
458242	AC112219.1	3	72310003	72312584	264.748	1074	0	0	1	1	1	0	0	#N/A	#N/A	#N/A	#N/A	#N/A	#N/A
368157	ERCC3	2	128050745	128053067	264.547	1075	1	0	1	0	0	0	0	ENSG00000163161	13.0245	13.1642	15.2471	20.9976	9.33307
135045	C11orf1	11	111748606	111750671	264.465	1076	1	0	1	0	0	0	0	ENSG00000137720	4.65264	8.16746	6.62133	13.4228	0.118421
135045	FDXACB1	11	111748606	111750671	264.465	1076	1	0	1	0	0	0	0	ENSG00000255561	1.02303	1.91379	0.637845	1.63813	0.134647
135045	ALG9	11	111748606	111750671	264.465	1076	1	0	1	0	0	0	0	ENSG00000086848	#N/A	#N/A	#N/A	#N/A	#N/A
133907	ATM	11	108093134	108097336	264.446	1077	0	0	1	0	1	1	1	ENSG00000149311	20.9373	28.6677	14.2816	257.866	79.8447
133907	NPAT	11	108093134	108097336	264.446	1077	0	0	1	0	1	1	1	ENSG00000149308	11.8986	5.37766	17.0529	24.3165	8.23077
5693	ZNF593	1	26495199	26499657	264.442	1078	1	0	1	0	0	0	0	ENSG00000142684	2.9707	2.07988	1.68494	0.869956	0.00142162
5693	RP11-96L14.7	1	26495199	26499657	264.442	1078	1	0	1	0	0	0	0	ENSG00000236782	0.0366983	0.0445333	0.0175226	0.0119358	0.0176803
635504	SYNCRIP	6	86350239	86354230	264.363	1079	0	0	1	1	0	1	1	ENSG00000135316	29.0688	29.1511	33.5339	24.8067	6.81828
611232	C6orf195	6	2633562	2635464	264.286	1080	0	0	1	0	0	1	1	ENSG00000164385	1.31869e-07	6.24733e-06	0.000369587	2.2824e-06	0.00160465
15998	RNU2-15P	1	65880831	65885279	264.102	1081	1	0	1	0	0	0	0	ENSG00000222624	3.49403e-06	1.10517e-05	0.00029524	7.49691e-06	2.5395e-05
416678	AC005220.3	20	52556648	52560771	264.092	1082	0	0	1	1	1	0	1	#N/A	#N/A	#N/A	#N/A	#N/A	#N/A
447093	UBP1	3	33479160	33483830	264.079	1083	1	0	1	0	0	0	0	ENSG00000153560	12.365	14.5903	14.7127	27.5402	11.5478
590983	TMED7	5	114966358	114971226	263.753	1084	0	0	1	1	0	1	0	ENSG00000134970	18.7917	38.8887	28.4953	15.9604	23.0599
436717	MLC1	22	50520885	50524558	263.566	1085	0	0	1	0	1	0	0	ENSG00000100427	7.89768	0.0734331	48.6944	0.0899114	0.203032
484355	MFSD1	3	158443544	158458008	263.482	1086	1	0	1	0	0	0	0	ENSG00000118855	32.707	116.128	97.3085	11.1164	57.0053
484355	RARRES1	3	158443544	158458008	263.482	1086	1	0	1	0	0	0	0	ENSG00000118849	1.29081	2.64169	0.333941	0.00940954	0.051147
484355	RP11-379F4.4	3	158443544	158458008	263.482	1086	1	0	1	0	0	0	0	#N/A	#N/A	#N/A	#N/A	#N/A	#N/A
391642	NDUFB3	2	201931658	201944815	263.481	1087	1	0	1	0	0	0	0	ENSG00000119013	32.2244	53.2733	29.982	13.0795	47.1207
391642	FAM126B	2	201931658	201944815	263.481	1087	1	0	1	0	0	0	0	ENSG00000155744	9.24718	8.24516	8.24464	9.69644	190.862
391642	RNU6-1206P	2	201931658	201944815	263.481	1087	1	0	1	0	0	0	0	ENSG00000252148	2.47683e-05	2.78791e-05	4.29855e-05	3.19653e-05	9.9693e-05
93841	SH3PXD2A	10	105614422	105616436	263.434	1088	0	0	1	1	1	0	0	ENSG00000107957	1.41615	1.61851	7.99636	1.4731	0.195025
476766	RNU6-1174P	3	134498267	134501477	263.34	1089	1	0	1	0	0	0	0	ENSG00000253087	2.34567e-05	3.00787e-05	2.50686e-05	2.74193e-05	0.000103749
268165	snoU13	16	50380961	50388364	263.314	1090	0	1	1	1	0	1	1	#N/A	#N/A	#N/A	#N/A	#N/A	#N/A
397237	NHEJ1	2	220024772	220037243	263.246	1091	0	0	1	0	1	0	0	ENSG00000187736	7.22165	4.3425	6.12148	5.29513	2.12593
397237	SLC23A3	2	220024772	220037243	263.246	1091	0	0	1	0	1	0	0	ENSG00000213901	0.420527	0.151742	0.305723	0.373707	0.979067
358161	RPIA	2	88986091	88993943	263.191	1092	0	0	1	0	0	1	1	ENSG00000153574	7.37521	3.2144	6.63764	5.64913	1.71691
238634	TRPM1	15	31449530	31459925	262.914	1093	0	0	1	1	0	0	1	ENSG00000134160	0.0123649	0.0350279	0.0298204	0.00842792	0.0475878
266015	HSD3B7	16	30984589	31014039	262.786	1094	1	0	1	0	0	0	0	ENSG00000099377	1.36104	18.1056	0.18126	0.0759297	1.13064
266015	STX1B	16	30984589	31014039	262.786	1094	1	0	1	0	0	0	0	ENSG00000099365	0.0765324	0.355704	0.265109	0.417525	0.01722
266015	AC135048.1	16	30984589	31014039	262.786	1094	1	0	1	0	0	0	0	#N/A	#N/A	#N/A	#N/A	#N/A	#N/A
266098	COX6A2	16	31439056	31440441	262.42	1095	1	0	1	0	0	0	0	ENSG00000156885	0.00128436	0.000182286	0.00017129	0.000192793	0.000709453
210610	OR4L1	14	20526717	20528759	262.352	1096	0	0	1	1	0	0	0	ENSG00000176246	5.9831e-07	5.11572e-07	5.67e-07	5.59669e-07	2.37561e-06
761318	NUDT2	9	34300322	34331257	262.312	1097	1	0	1	0	0	0	0	ENSG00000164978	6.96759	8.22797	9.05415	7.48892	3.08365
761318	KIF24	9	34300322	34331257	262.312	1097	1	0	1	0	0	0	0	ENSG00000186638	3.38349	0.490951	1.27061	0.0440688	0.325593
761318	SERPINH1P1	9	34300322	34331257	262.312	1097	1	0	1	0	0	0	0	ENSG00000229207	0.0137133	6.62616e-07	2.75043e-07	3.80466e-07	6.20531e-06
737103	SPAG1	8	101168232	101175233	261.867	1098	0	0	1	0	1	1	0	ENSG00000104450	0.386661	1.17348	0.313701	0.207656	7.21635
737103	Y_RNA	8	101168232	101175233	261.867	1098	0	0	1	0	1	1	0	#N/A	#N/A	#N/A	#N/A	#N/A	#N/A
602665	GALNT10	5	153561099	153571199	261.84	1099	0	0	1	0	1	0	0	ENSG00000164574	25.6942	5.26642	21.6151	5.21911	9.88999
259093	RPS2	16	2009125	2013694	261.836	1100	1	0	1	0	0	0	0	ENSG00000140988	745.458	570.652	621.882	1192.63	89.0655
259093	SNORA64	16	2009125	2013694	261.836	1100	0	0	1	0	0	0	0	ENSG00000207405	460.701	485.682	113.174	185.441	1557.19
259093	SNORA10	16	2009125	2013694	261.836	1100	1	0	1	0	0	0	0	ENSG00000206811	131.677	34.2087	30.1902	44.3354	288.793
259093	NDUFB10	16	2009125	2013694	261.836	1100	1	0	1	0	0	0	0	ENSG00000140990	36.1356	48.5897	30.452	19.1038	22.6958
719504	AP3M2	8	42007227	42013069	261.796	1101	0	0	1	0	0	1	1	ENSG00000070718	3.0603	4.66545	3.01751	42.45	4.18015
719504	RP11-589C21.5	8	42007227	42013069	261.796	1101	0	0	1	0	0	1	1	#N/A	#N/A	#N/A	#N/A	#N/A	#N/A
359098	ASTL	2	96799844	96804798	261.499	1102	1	0	1	0	0	0	0	ENSG00000188886	0.00167957	0.539303	0.000523254	0.083678	0.44169
689373	DLX6-AS1	7	96632605	96644983	261.492	1103	0	0	1	0	1	1	0	ENSG00000231764	0.00413867	0.00542632	0.00429064	0.00565963	0.025495
689373	DLX6	7	96632605	96644983	261.492	1103	0	0	1	0	1	1	0	ENSG00000006377	0.000818771	0.000936991	0.000812054	0.000945645	0.00347336
689373	DLX6-AS2	7	96632605	96644983	261.492	1103	0	0	1	0	1	1	0	ENSG00000271956	#N/A	#N/A	#N/A	#N/A	#N/A
143599	C1RL	12	7260342	7262367	261.485	1104	0	0	1	0	1	0	0	ENSG00000139178	3.22204	2.5944	6.8879	6.26041	119.957
143599	C1RL-AS1	12	7260342	7262367	261.485	1104	0	0	1	0	1	0	0	ENSG00000205885	0.718449	0.232068	2.62357	2.47445	19.359
737858	KLF10	8	103664646	103670885	261.343	1105	0	0	1	0	1	0	1	ENSG00000155090	10.1628	18.818	11.3244	1.00385	12.1414
463641	EPHA3	3	89154247	89157618	261.34	1106	1	0	1	0	0	0	0	ENSG00000044524	9.83285e-05	0.000203885	0.00145182	0.00271557	0.00111555
766041	RNU6-820P	9	71550735	71551895	261.012	1107	1	0	1	0	0	0	0	ENSG00000207000	2.34156e-05	2.74318e-05	2.11702e-05	3.2319e-05	9.18024e-05
710837	LONRF1	8	12611219	12622413	260.997	1108	0	0	1	0	1	0	1	ENSG00000154359	3.06491	6.09706	13.9473	2.42526	32.0285
261132	CLEC16A	16	11038195	11044482	260.89	1109	1	0	1	0	0	0	0	ENSG00000038532	8.16861	5.72703	5.74902	6.54781	16.6582
2515	DHRS3	1	12673527	12691643	260.806	1110	0	0	1	0	1	1	0	ENSG00000162496	0.321407	7.79032	0.0502846	25.8158	0.0166177
2515	RP11-474O21.5	1	12673527	12691643	260.806	1110	0	0	1	0	1	1	0	#N/A	#N/A	#N/A	#N/A	#N/A	#N/A
158320	RDH16	12	57346889	57353382	260.647	1111	1	0	1	0	0	0	0	ENSG00000139547	0.0561614	0.0254369	0.113442	0.249014	0.000597246
32426	TTF2	1	117602664	117607113	260.472	1112	1	0	1	0	0	0	0	ENSG00000116830	11.8508	4.41525	14.7277	7.98707	1.45291
215145	NFKBIA	14	35871296	35874601	260.218	1113	1	0	1	0	0	0	0	ENSG00000100906	25.1879	148.506	110.295	66.8096	2130.31
57830	PYCR2	1	226110293	226136406	260.067	1114	1	0	1	0	0	0	0	ENSG00000143811	38.6082	17.6899	61.6295	20.9754	7.93224
57830	RP4-559A3.7	1	226110293	226136406	260.067	1114	1	0	1	0	0	0	0	ENSG00000255835	0.0802418	0.000998535	0.187897	0.000496798	3.36459e-05
57830	LEFTY2	1	226110293	226136406	260.067	1114	1	0	1	0	0	0	0	ENSG00000143768	0.0113867	0.000426297	0.074501	0.00869487	0.00149757
57830	RP4-559A3.6	1	226110293	226136406	260.067	1114	1	0	1	0	0	0	0	#N/A	#N/A	#N/A	#N/A	#N/A	#N/A
149746	TM7SF3	12	27166326	27171341	259.98	1115	0	0	1	1	1	0	1	ENSG00000064115	18.9763	33.1172	38.3895	9.44367	10.6702
211727	SDR39U1	14	24908556	24914894	259.818	1116	0	0	1	0	0	0	1	ENSG00000100445	7.02928	7.79931	7.54529	18.9247	3.63866
171039	LTA4H	12	96434902	96441410	259.566	1117	0	0	1	0	0	1	0	ENSG00000111144	16.6046	205.22	16.4721	30.2987	121.151
611293	SERPINB1	6	2840902	2842325	259.565	1118	0	0	1	0	1	1	0	ENSG00000021355	22.5512	63.6999	92.3529	23.324	334.985
340591	LBH	2	30452812	30455946	259.519	1119	0	0	1	0	0	1	0	ENSG00000213626	75.8778	0.567192	0.930034	80.4851	0.87396
110325	CCDC34	11	27384971	27386044	259.517	1120	1	0	1	0	0	0	0	ENSG00000109881	7.96398	0.543778	1.24174	0.680605	0.00958405
223296	SNORD112	14	61727941	61731018	259.441	1121	0	0	1	1	0	0	0	#N/A	#N/A	#N/A	#N/A	#N/A	#N/A
747449	TG	8	133876406	133879760	259.426	1122	0	0	1	1	1	1	0	ENSG00000042832	0.134541	0.213336	0.143828	0.414898	8.02637
357302	TGOLN2	2	85553989	85556149	259.194	1123	1	0	1	0	0	0	0	ENSG00000152291	14.1366	55.2625	33.6118	28.5453	135.972
274940	GLG1	16	74639978	74653105	258.296	1124	0	0	1	1	1	0	0	ENSG00000090863	17.6504	29.6516	29.947	57.1104	39.9827
274940	HSPE1P7	16	74639978	74653105	258.296	1124	0	0	1	1	1	0	0	ENSG00000270945	#N/A	#N/A	#N/A	#N/A	#N/A
478799	RNF7	3	141443615	141459087	258.284	1125	0	0	1	1	1	0	0	ENSG00000114125	14.9304	42.435	21.4498	19.3633	14.6217
400986	MIR1471	2	232747842	232757173	258.09	1126	1	0	1	0	0	0	0	ENSG00000222246	6.4881e-05	9.06036e-05	6.35674e-05	8.80305e-05	0.000209956
93977	GSTO2	10	106027836	106028853	258.085	1127	1	0	1	0	0	0	0	ENSG00000065621	0.41029	0.302653	1.15372	0.472872	1.0617
93977	MIR4482-1	10	106027836	106028853	258.085	1127	1	0	1	0	0	0	0	ENSG00000266852	2.53562e-05	3.53278e-05	3.54175e-05	3.24713e-05	0.0001017
211323	MMP14	14	23304582	23318454	257.898	1128	1	0	1	0	0	0	0	ENSG00000157227	3.28806	16.7554	16.171	0.180118	0.305798
510542	TXK	4	48134249	48141334	257.725	1129	1	0	1	0	0	0	0	ENSG00000074966	1.75147	0.219472	12.3474	60.2932	0.85668
676422	RNU6-1091P	7	50501855	50505111	257.387	1130	1	0	1	0	0	0	0	ENSG00000200815	1.74625e-05	2.92681e-05	2.57681e-05	3.19967e-05	0.000382481
287110	MED24	17	38209544	38212643	257.166	1131	1	0	1	0	0	0	0	ENSG00000008838	20.8192	10.6247	15.778	11.1553	1.12986
30212	GPR61	1	110080432	110083450	257.013	1132	0	0	1	0	0	0	0	ENSG00000156097	0.0388638	0.0156512	0.00914983	0.126057	0.0471481
577897	HEXB	5	73926795	73947358	256.717	1133	0	0	1	0	0	0	1	ENSG00000049860	42.3255	223.896	21.7816	13.6075	39.6762
577897	ENC1	5	73926795	73947358	256.717	1133	0	0	1	0	0	0	1	ENSG00000171617	0.605854	4.72313	0.357056	2.93841	2.73859
366479	TSN	2	122494151	122497529	256.68	1134	0	0	1	0	0	1	0	ENSG00000211460	19.8009	21.8722	18.5505	21.8117	15.5852
366479	NIFK	2	122494151	122497529	256.68	1134	0	0	1	0	0	1	0	ENSG00000155438	13.6393	18.3639	15.9096	18.0271	1.34363
244360	TRPM7	15	50973870	50989874	256.553	1135	1	0	1	0	0	0	0	ENSG00000092439	26.478	17.4785	19.8583	23.1429	9.10355
244360	RN7SL354P	15	50973870	50989874	256.553	1135	1	0	1	0	0	0	0	ENSG00000243027	0.0957274	4.84963e-06	1.91702e-06	0.000122483	8.51691e-06
285274	ZNF207	17	30669367	30683017	256.435	1136	1	0	1	0	0	0	0	ENSG00000010244	86.0406	76.6407	109.593	95.6545	145.136
285274	C17orf75	17	30669367	30683017	256.435	1136	1	0	1	0	0	0	0	ENSG00000108666	5.26041	3.49799	4.55365	6.09637	0.662997
285274	MIR632	17	30669367	30683017	256.435	1136	1	0	1	0	0	0	0	ENSG00000207928	2.39868e-05	3.5776e-05	3.34465e-05	4.24042e-05	0.000137318
285274	OOSP1P2	17	30669367	30683017	256.435	1136	1	0	1	0	0	0	0	ENSG00000263749	1.44919e-06	6.13028e-06	2.64712e-06	7.74439e-06	8.53762e-06
354198	snoU13	2	75642249	75649147	256.372	1137	0	1	1	0	0	0	0	#N/A	#N/A	#N/A	#N/A	#N/A	#N/A
426665	RUNX1	21	37355907	37360248	256.029	1138	1	0	1	0	0	0	0	ENSG00000159216	13.8128	8.91638	29.4255	15.6934	15.4087
589842	EPB41L4A-AS1	5	111489948	111497752	255.786	1139	0	0	1	0	1	0	0	ENSG00000224032	16.0558	8.57356	12.1661	56.7338	0.725494
589842	SNORA13	5	111489948	111497752	255.786	1139	0	0	1	0	1	0	0	ENSG00000238363	8.31523	13.6934	3.67565	2.01503	70.4626
598614	PCDHA7	5	140211436	140227248	255.718	1140	1	0	1	0	0	0	0	ENSG00000204963	0.000231674	2.36793e-05	2.1834e-05	2.5736e-05	8.55e-05
598614	PCDHA8	5	140211436	140227248	255.718	1140	1	0	1	0	0	0	0	ENSG00000204962	2.11969e-05	2.72978e-05	2.00001e-05	3.33405e-05	8.59573e-05
598614	PCDHA9	5	140211436	140227248	255.718	1140	1	0	1	0	0	0	0	ENSG00000204961	1.89278e-05	8.98514e-05	5.35158e-05	0.00036664	0.0028648
106362	CYP2R1	11	14913741	14919753	254.917	1141	0	0	1	0	0	1	1	ENSG00000186104	5.29829	4.54242	6.1719	9.51031	1.11259
291621	CCDC182	17	55808976	55828271	254.559	1142	1	0	1	0	0	0	0	ENSG00000166329	4.29108e-07	5.69027e-07	1.62462e-05	5.90589e-07	2.30224e-06
527229	NFKB1	4	103421575	103426812	254.444	1143	0	0	1	0	0	1	0	ENSG00000109320	8.09223	15.6767	8.93224	30.4052	51.7774
527229	AF213884.2	4	103421575	103426812	254.444	1143	0	0	1	0	0	1	0	#N/A	#N/A	#N/A	#N/A	#N/A	#N/A
370370	snoU13	2	135816155	135825760	254.4	1144	0	1	1	0	0	0	0	#N/A	#N/A	#N/A	#N/A	#N/A	#N/A
219670	DNAAF2	14	50099720	50106522	253.891	1145	0	0	1	0	1	0	0	ENSG00000165506	2.12055	1.91257	2.41038	1.45921	0.386071
634813	PRSS35	6	84221546	84222871	253.713	1146	0	0	1	1	1	0	0	ENSG00000146250	0.00031201	0.000920175	0.00168883	0.000258402	0.000118552
143543	CD4	12	6921878	6943614	253.653	1147	0	0	1	0	0	1	0	ENSG00000010610	5.47378	19.7253	6.46345	41.4157	3.2939
143543	GPR162	12	6921878	6943614	253.653	1147	0	0	1	0	0	1	0	ENSG00000250510	1.09786	1.62166	0.553244	0.0224496	9.66236
143543	LEPREL2	12	6921878	6943614	253.653	1147	0	0	1	0	0	1	0	ENSG00000110811	0.20291	0.179314	0.696772	1.13418	0.608404
620064	HLA-DOA	6	32970533	32984813	253.417	1148	1	0	1	0	0	0	0	ENSG00000204252	1.62734	0.491648	0.0323854	1.09659	0.0426527
24069	ZNF326	1	90454162	90461969	253.415	1149	0	0	1	0	1	0	0	ENSG00000162664	10.3137	4.46372	11.1854	10.655	4.93593
24069	GEMIN8P4	1	90454162	90461969	253.415	1149	0	0	1	0	1	0	0	ENSG00000228175	1.33673	0.238888	1.40097	0.000138831	0.0353315
541105	ABCE1	4	146015816	146020399	253.129	1150	0	0	1	0	0	1	0	ENSG00000164163	33.4146	27.777	22.0546	30.2652	0.158022
541105	ANAPC10	4	146015816	146020399	253.129	1150	0	0	1	0	0	1	0	ENSG00000164162	9.34189	10.1831	7.87285	9.2628	2.57835
645110	RWDD1	6	116890037	116894622	252.65	1151	1	0	1	0	0	0	0	ENSG00000111832	14.3091	15.6367	11.4266	17.4545	3.5419
730729	HEY1	8	80675273	80681488	252.608	1152	0	0	1	0	1	0	0	ENSG00000164683	1.05685	0.0466564	0.0269614	0.0150687	6.58116
730729	RP11-27N21.3	8	80675273	80681488	252.608	1152	0	0	1	0	1	0	0	#N/A	#N/A	#N/A	#N/A	#N/A	#N/A
340211	FAM179A	2	29177007	29182099	252.583	1153	0	0	1	1	1	1	0	ENSG00000189350	0.0700192	0.398068	0.0168096	0.232506	0.128554
452004	VPRBP	3	51533641	51537378	252.508	1154	0	0	1	0	1	0	0	ENSG00000145041	12.1959	8.42102	10.8842	15.4397	3.50501
492185	LINC00888	3	183167867	183175379	252.301	1155	1	0	1	0	0	0	0	ENSG00000240024	1.51091	2.84602	3.33808	0.468318	0.0366755
492185	SNORA63	3	183167867	183175379	252.301	1155	1	0	1	0	0	0	0	ENSG00000200320	#N/A	#N/A	#N/A	#N/A	#N/A
492185	SNORA81	3	183167867	183175379	252.301	1155	1	0	1	0	0	0	0	ENSG00000221420	#N/A	#N/A	#N/A	#N/A	#N/A
492185	SNORA4	3	183167867	183175379	252.301	1155	0	0	1	0	0	0	0	ENSG00000263776	#N/A	#N/A	#N/A	#N/A	#N/A
476454	TOPBP1	3	133371750	133380911	251.979	1156	0	0	1	1	0	1	1	ENSG00000163781	34.5609	14.7347	26.7051	16.4532	32.3503
476454	TFP1	3	133371750	133380911	251.979	1156	0	0	1	1	0	1	1	ENSG00000242337	0.0909645	0.104354	0.349809	0.123452	0.0612855
36414	UBAP2L	1	154237905	154247106	251.908	1157	0	0	1	0	0	0	1	ENSG00000143569	38.4523	25.188	46.0463	38.6042	68.2458
36414	HAX1	1	154237905	154247106	251.908	1157	0	0	1	0	0	0	1	ENSG00000143575	36.1091	33.5165	37.3479	30.0978	19.0625

## Sheet: MacMon_SIPs
baitID	baitName	baitChr	baitStart	baitEnd	intscore	rank	specific	shared	SIP.Ery	SIP.MacMon	SIP.MK	SIP.nCD4	SIP.Neu	ENSEMBL_GENEID	Ery	MacMon	MK	nCD4	Neu
95976	DUSP5	10	112255134	112262944	3083.13	1	0	1	1	1	1	1	1	ENSG00000138166	4.53304	6.86613	19.3344	1.64865	1.23242
95976	RP11-525A16.4	10	112255134	112262944	3083.13	1	0	1	1	1	1	1	1	#N/A	#N/A	#N/A	#N/A	#N/A	#N/A
14164	FGGY	1	59758286	59764653	2378.29	2	0	1	1	1	1	1	1	ENSG00000172456	1.83305	5.19975	1.8878	5.59762	21.0274
95927	SMNDC1	10	112061091	112067985	2023.97	3	0	1	1	1	1	1	1	ENSG00000119953	10.5421	6.34154	12.2569	9.81939	32.1273
683131	PTPN12	7	77161674	77168472	1960.7	4	0	1	1	1	1	1	1	ENSG00000127947	11.4426	22.3948	58.938	3.01033	144.201
581857	RASA1	5	86559609	86565202	1953.71	5	0	1	1	1	1	1	1	ENSG00000145715	10.9161	15.4402	32.1237	12.9643	14.9518
468737	CD47	3	107809073	107817390	1828.39	6	0	0	1	1	1	0	1	ENSG00000196776	49.3234	62.1104	209.148	82.8357	76.8481
583213	ARRDC3	5	90678873	90679948	1742.88	7	0	1	1	1	1	1	1	ENSG00000113369	18.4269	10.3945	10.6064	30.2543	200.246
132009	BIRC2	11	102216438	102219921	1489.5	8	0	0	0	1	1	1	1	ENSG00000110330	13.9163	25.7421	15.1168	21.8101	49.0265
575102	ADAMTS6	5	64777556	64778174	1487.85	9	0	0	1	1	1	1	0	ENSG00000049192	0.895145	0.273552	0.894438	3.34677	0.0283579
176716	MED13L	12	116714223	116718352	1482.3	10	0	1	1	1	1	1	1	ENSG00000123066	33.8541	16.416	21.2979	39.1272	290.516
585677	CHD1	5	98258843	98266385	1433.35	11	0	1	1	1	1	1	1	ENSG00000153922	30.4201	20.4624	20.6748	55.5774	131.845
585677	CTD-2007H13.3	5	98258843	98266385	1433.35	11	0	1	1	1	1	1	1	#N/A	#N/A	#N/A	#N/A	#N/A	#N/A
410114	THBD	20	23027371	23034119	1423.44	12	0	0	1	1	1	0	1	ENSG00000178726	2.10014	0.530969	4.98542	0.00552596	37.4478
645098	FAM26D	6	116849474	116856183	1413.73	13	0	1	1	1	1	1	1	ENSG00000164451	0.00198751	0.00236695	0.00386812	0.00239486	0.00899857
772460	GADD45G	9	92217015	92221435	1406.61	14	0	1	1	1	1	1	1	ENSG00000130222	2.66178	2.58734	0.853076	0.0288422	6.11234
301599	LDLRAD4	18	13216144	13218929	1334.11	15	0	0	1	1	1	1	0	ENSG00000168675	6.42646	8.30607	23.0902	13.9178	7.03375
301599	RP11-794M8.1	18	13216144	13218929	1334.11	15	0	0	1	1	1	1	0	#N/A	#N/A	#N/A	#N/A	#N/A	#N/A
547547	MSMO1	4	166247377	166249653	1332.71	16	0	1	1	1	1	1	1	ENSG00000052802	24.3859	25.2452	43.0677	4.02293	1.67303
545471	PPID	4	159642400	159646003	1293.27	17	0	1	1	1	1	1	1	ENSG00000171497	11.017	16.441	13.2937	9.44098	18.2803
344502	AC010883.5	2	43455071	43460452	1291.25	18	0	1	1	1	1	1	1	#N/A	#N/A	#N/A	#N/A	#N/A	#N/A
229055	GTF2A1	14	81685218	81688296	1289.43	19	0	1	1	1	1	1	1	ENSG00000165417	11.6525	7.85732	20.6595	7.94501	20.0407
317542	RTTN	18	67871441	67876672	1279.88	20	0	0	1	1	1	1	0	ENSG00000176225	7.24451	1.2896	4.12436	9.10447	0.350994
641927	PRDM1	6	106531924	106537743	1260.06	21	0	0	0	1	1	0	0	ENSG00000057657	4.21276	4.61825	0.166664	2.04089	23.1201
683101	snoU13	7	77047332	77054169	1207.2	22	0	1	0	1	1	0	1	#N/A	#N/A	#N/A	#N/A	#N/A	#N/A
62277	CHML	1	241798766	241801985	1202.16	23	0	0	1	1	1	1	0	ENSG00000203668	3.51793	3.43177	2.89789	4.63965	0.703201
527386	SLC9B1	4	103935166	103941497	1200.48	24	0	1	1	1	1	1	1	ENSG00000164037	0.333896	0.37186	1.06588	2.07397	0.0618588
371273	HNMT	2	138721229	138721933	1174.88	25	0	0	1	1	1	0	0	ENSG00000150540	1.99757	44.7043	0.120357	0.0191245	0.0883127
268169	BRD7	16	50395469	50403807	1166.46	26	0	1	1	1	1	1	1	ENSG00000166164	23.7436	21.7397	27.9989	28.9005	20.2925
268169	RP11-21B23.1	16	50395469	50403807	1166.46	26	0	1	1	1	1	1	1	#N/A	#N/A	#N/A	#N/A	#N/A	#N/A
590960	FEM1C	5	114879660	114881446	1165.54	27	0	1	1	1	1	1	1	ENSG00000145780	3.99354	10.8601	2.54754	3.9549	21.33
433739	MB	22	36033286	36036752	1146.78	28	0	0	1	1	1	0	0	ENSG00000198125	0.0145617	0.0225994	0.015666	0.0195879	0.0720285
618010	RP3-522P13.1	6	25254994	25266229	1123.39	29	0	0	1	1	1	1	0	#N/A	#N/A	#N/A	#N/A	#N/A	#N/A
618010	RP3-522P13.3	6	25254994	25266229	1123.39	29	0	0	1	1	1	1	0	#N/A	#N/A	#N/A	#N/A	#N/A	#N/A
142867	CCND2	12	4380818	4386594	1112.02	30	0	1	1	1	1	1	1	ENSG00000118971	19.9539	17.1051	22.0903	24.7014	4.8393
142867	CCND2-AS1	12	4380818	4386594	1112.02	30	0	1	1	1	1	1	1	ENSG00000256164	0.0001063	0.000350718	0.123867	0.101569	4.59513e-06
142867	CCND2-AS2	12	4380818	4386594	1112.02	30	0	1	1	1	1	1	1	ENSG00000255920	1.30552e-06	2.11104e-05	0.000894753	0.00031568	5.36615e-06
390635	PLCL1	2	198668910	198670337	1090.77	31	0	0	1	1	1	1	0	ENSG00000115896	0.896734	4.26676	1.04116	18.6076	2.81137
297804	COLEC12	18	491689	504755	1078.93	32	0	0	0	1	0	0	1	ENSG00000158270	0.3621	0.903943	0.0370903	0.000373824	0.000704413
126766	EED	11	85952696	85957638	1073.37	33	0	1	1	1	1	1	1	ENSG00000074266	11.6657	10.3124	6.67187	12.472	7.97762
164467	PHLDA1	12	76424220	76432518	1060.16	34	0	0	1	1	1	1	0	ENSG00000139289	0.543428	5.37009	0.358351	0.133621	0.271686
164467	RP11-290L1.2	12	76424220	76432518	1060.16	34	0	0	1	1	1	1	0	#N/A	#N/A	#N/A	#N/A	#N/A	#N/A
164467	RP11-290L1.3	12	76424220	76432518	1060.16	34	0	0	1	1	1	1	0	#N/A	#N/A	#N/A	#N/A	#N/A	#N/A
58614	RP5-1061H20.5	1	229363280	229363819	1055.21	35	0	1	1	1	1	1	1	#N/A	#N/A	#N/A	#N/A	#N/A	#N/A
48024	RGS2	1	192774793	192779385	1050.52	36	0	1	1	1	1	1	1	ENSG00000116741	13.6641	19.1243	2.43085	6.96576	2867.02
69190	VIM	10	17267901	17273494	1038.55	37	0	1	1	1	1	1	1	ENSG00000026025	62.6181	1697.56	29.0709	161.544	487.558
69190	VIM-AS1	10	17267901	17273494	1038.55	37	0	1	1	1	1	1	1	ENSG00000229124	0.407178	3.57014	2.15102	4.10232	24.9361
615437	ATXN1	6	16759205	16763503	1031.71	38	0	0	0	1	1	0	0	ENSG00000124788	2.70781	14.029	1.65788	6.09822	93.3343
615437	RP1-151F17.1	6	16759205	16763503	1031.71	38	0	0	0	1	1	0	0	#N/A	#N/A	#N/A	#N/A	#N/A	#N/A
126722	PICALM	11	85778970	85786092	1028.54	39	0	1	1	1	1	1	1	ENSG00000073921	174.279	166.028	66.138	45.6557	1297.31
480398	RNU6-428P	3	146288053	146292128	1012.36	40	0	1	1	1	1	1	1	ENSG00000199812	2.37838e-05	3.01052e-05	2.78986e-05	2.82616e-05	9.78322e-05
727693	NCOA2	8	71313105	71317335	1008.13	41	0	1	1	1	1	1	1	ENSG00000140396	14.1907	10.1116	14.2572	16.3749	176.816
617998	RP11-191A15.4	6	25214810	25223692	998.92	42	0	0	1	1	1	1	0	#N/A	#N/A	#N/A	#N/A	#N/A	#N/A
535855	JADE1	4	129730071	129736122	992.271	43	0	0	1	1	1	1	0	ENSG00000077684	14.1351	3.85314	7.89803	16.275	41.0946
618316	HIST1H3D	6	26196886	26199681	990.75	44	0	1	1	1	1	1	1	ENSG00000197409	597.213	18.7233	236.833	42.3592	38.6729
618316	HIST1H2AD	6	26196886	26199681	990.75	44	0	1	1	1	1	1	1	ENSG00000196866	236.795	8.98448	157.128	13.5618	20.2755
35706	CGN	1	151496436	151509686	984.851	45	0	0	1	1	1	0	0	ENSG00000143375	0.0996161	0.0158489	0.0472862	0.10591	0.0444875
35706	SNORA44	1	151496436	151509686	984.851	45	0	0	1	1	1	0	0	#N/A	#N/A	#N/A	#N/A	#N/A	#N/A
286149	SLFN12L	17	33861853	33864995	981.57	46	0	1	1	1	1	1	1	ENSG00000205045	0.611474	0.146236	0.0961525	35.6136	0.381386
404711	RPS18P1	20	5505191	5515865	978.481	47	0	1	1	1	1	1	1	ENSG00000225831	0.0588731	1.23913e-06	1.47345e-06	1.56323e-06	4.73811e-06
404711	RP5-1022P6.5	20	5505191	5515865	978.481	47	0	1	1	1	1	1	1	#N/A	#N/A	#N/A	#N/A	#N/A	#N/A
60196	IRF2BP2	1	234740384	234749444	970.529	48	0	1	1	1	1	1	1	ENSG00000168264	103.677	30.8216	29.0395	55.3849	36.6449
60196	RP4-781K5.2	1	234740384	234749444	970.529	48	0	1	1	1	1	1	1	#N/A	#N/A	#N/A	#N/A	#N/A	#N/A
116600	PTPRJ	11	48001307	48004168	966.692	49	0	1	1	1	1	1	1	ENSG00000149177	9.08318	24.299	35.5314	12.6174	242.14
342389	CRIM1	2	36577978	36589064	964.579	50	0	0	1	1	1	0	0	ENSG00000150938	1.05513	2.60648	0.558843	0.394279	0.712229
342389	RP11-490M8.1	2	36577978	36589064	964.579	50	0	0	1	1	1	0	0	#N/A	#N/A	#N/A	#N/A	#N/A	#N/A
34158	RNU2-38P	1	144941765	144945045	964.504	51	0	1	1	1	1	1	1	ENSG00000222788	4.84736e-05	4.50649e-05	5.26262e-05	5.50288e-05	0.00022157
427447	ETS2	21	40174503	40179024	960.574	52	0	0	1	1	1	0	0	ENSG00000157557	13.0477	4.65831	31.3553	2.05426	90.2487
69192	VIM	10	17274482	17278643	959.501	53	0	1	1	1	1	1	1	ENSG00000026025	62.6181	1697.56	29.0709	161.544	487.558
69192	RP11-124N14.3	10	17274482	17278643	959.501	53	0	1	1	1	1	1	1	#N/A	#N/A	#N/A	#N/A	#N/A	#N/A
618605	HIST1H2BK	6	27113447	27115524	958.452	54	0	0	1	1	1	1	0	ENSG00000197903	795.22	89.6314	398.101	46.5763	82.4457
618605	HIST1H2AH	6	27113447	27115524	958.452	54	0	0	1	1	1	1	0	ENSG00000184825	687.594	8.86157	241.939	6.30879	2.8195
618605	MIR3143	6	27113447	27115524	958.452	54	0	0	1	1	1	1	0	ENSG00000265565	6.83567e-05	7.12037e-05	7.03027e-05	7.94879e-05	0.000279928
241277	THBS1	15	39872009	39875707	953.319	55	0	0	0	1	1	0	0	ENSG00000137801	111.636	1.24129	2283.3	0.71921	0.299141
45564	IVNS1ABP	1	185284681	185295856	951.157	56	0	0	0	1	1	1	1	ENSG00000116679	29.3486	87.9691	44.8699	60.9012	499.033
45564	GS1-279B7.2	1	185284681	185295856	951.157	56	0	0	0	1	1	1	1	#N/A	#N/A	#N/A	#N/A	#N/A	#N/A
571520	SNX18	5	53812428	53818070	939.086	57	0	1	1	1	1	1	1	ENSG00000178996	1.91308	13.6299	1.15728	4.24537	144.298
590975	TICAM2	5	114937005	114941483	938.707	58	0	1	1	1	1	1	1	ENSG00000243414	1.62102	3.47452	0.396675	0.031411	2.80412
590975	AC010226.4	5	114937005	114941483	938.707	58	0	1	1	1	1	1	1	#N/A	#N/A	#N/A	#N/A	#N/A	#N/A
315353	BCL2	18	60982875	60990419	937.653	59	0	0	1	1	1	1	0	ENSG00000171791	0.968686	2.44985	0.456576	57.2733	0.450871
125673	PRCP	11	82610457	82615041	936.776	60	0	1	1	1	1	1	1	ENSG00000137509	9.66063	68.339	8.17982	6.97555	74.2009
125673	C11orf82	11	82610457	82615041	936.776	60	0	1	1	1	1	1	1	ENSG00000165490	4.72172	2.73601	2.24033	0.300283	2.07657
376035	FMNL2	2	153190646	153194201	936.404	61	1	0	0	1	0	0	0	ENSG00000157827	2.17088	10.4673	0.0863451	0.221961	0.931387
136563	SIK3	11	116968002	116974060	935.219	62	0	1	1	1	1	1	1	ENSG00000160584	15.1797	7.78039	6.37627	11.1881	82.603
136563	AP000936.4	11	116968002	116974060	935.219	62	0	1	1	1	1	1	1	#N/A	#N/A	#N/A	#N/A	#N/A	#N/A
675092	IGFBP3	7	45955727	45963820	934.404	63	0	0	1	1	1	0	0	ENSG00000146674	0.00766914	0.019865	0.00847682	0.903382	0.0469775
645102	TRAPPC3L	6	116859344	116868350	931.724	64	0	1	1	1	1	1	1	ENSG00000173626	0.016123	0.00170918	0.220214	0.00368211	0.00240977
260576	TMEM114	16	8621800	8623057	930.237	65	0	1	1	1	1	1	1	ENSG00000232258	0.000140977	0.334127	0.00016047	0.000178921	0.000626123
103053	RHOG	11	3860032	3863125	928.556	66	0	1	1	1	1	1	1	ENSG00000177105	22.8657	34.3602	30.3847	12.5858	302.094
370100	MGAT5	2	134875525	134884121	926.347	67	0	0	0	1	1	1	1	ENSG00000152127	3.8973	20.7134	6.67465	12.8182	17.92
732526	CA2	8	86374486	86381631	922.618	68	0	1	1	1	1	1	1	ENSG00000104267	25.3482	28.051	17.5164	0.0421203	1.2016
732526	RP11-317J10.2	8	86374486	86381631	922.618	68	0	1	1	1	1	1	1	#N/A	#N/A	#N/A	#N/A	#N/A	#N/A
289553	RP11-481C4.1	17	49119440	49123261	917.015	69	0	1	1	1	1	1	1	#N/A	#N/A	#N/A	#N/A	#N/A	#N/A
683175	RSBN1L	7	77325125	77327287	910.528	70	0	1	1	1	1	1	1	ENSG00000187257	9.4338	6.31656	8.94827	14.3986	64.102
683175	RSBN1L-AS1	7	77325125	77327287	910.528	70	0	1	1	1	1	1	1	ENSG00000214293	2.33013	1.40654	2.78007	1.9609	10.4474
470320	CD200R1	3	112693909	112695161	907.514	71	0	0	1	1	1	0	0	ENSG00000163606	0.816976	0.17841	0.722236	3.94986	0.500795
297832	CLUL1	18	593872	601100	901.316	72	1	0	0	1	0	0	0	ENSG00000079101	0.0345945	0.0809504	0.0314433	0.0912973	0.113398
581851	AC008394.1	5	86534776	86538784	892.626	73	1	0	0	1	0	0	0	#N/A	#N/A	#N/A	#N/A	#N/A	#N/A
618793	HIST1H3H	6	27776624	27782228	886.446	74	0	1	1	1	1	1	1	ENSG00000203813	843.862	12.7163	498.309	27.2094	5.52323
618814	HIST1H1B	6	27834351	27837620	886.217	75	0	1	1	1	1	1	1	ENSG00000184357	1561.56	11.4028	565.383	5.05053	4.33652
547509	KLHL2	4	166127745	166130031	882.454	76	0	1	1	1	1	1	1	ENSG00000109466	3.97591	16.284	6.52697	12.0316	135.058
547509	TMEM192	4	166127745	166130031	882.454	76	0	1	1	1	1	1	1	ENSG00000170088	4.27205	14.7935	4.83688	3.35337	0.797211
103057	STIM1	11	3872404	3879208	872.645	77	0	1	1	1	1	1	1	ENSG00000167323	15.1645	13.3345	68.1338	25.2049	41.7723
103057	MIR4687	11	3872404	3879208	872.645	77	0	1	1	1	1	1	1	ENSG00000263421	4.26776e-05	4.95764e-05	4.5278e-05	4.52635e-05	0.000153936
103057	AC090587.4	11	3872404	3879208	872.645	77	0	1	1	1	1	1	1	#N/A	#N/A	#N/A	#N/A	#N/A	#N/A
103057	AC090587.5	11	3872404	3879208	872.645	77	0	1	1	1	1	1	1	#N/A	#N/A	#N/A	#N/A	#N/A	#N/A
346013	PPP1R21	2	48662849	48668705	871.269	78	0	1	1	1	1	1	1	ENSG00000162869	6.36512	6.6581	6.59108	9.9198	45.6875
346013	RP11-191L17.1	2	48662849	48668705	871.269	78	0	1	1	1	1	1	1	#N/A	#N/A	#N/A	#N/A	#N/A	#N/A
129654	RP11-712B9.2	11	94879591	94887222	869.323	79	0	1	1	1	1	1	1	#N/A	#N/A	#N/A	#N/A	#N/A	#N/A
477302	STAG1	3	136465351	136472558	869.223	80	0	1	1	1	1	1	1	ENSG00000118007	16.9564	10.2478	15.3707	19.94	47.4653
477302	RP11-102M11.2	3	136465351	136472558	869.223	80	0	1	1	1	1	1	1	#N/A	#N/A	#N/A	#N/A	#N/A	#N/A
86344	KCNMA1	10	79394612	79399403	859.978	81	0	0	1	1	1	0	1	ENSG00000156113	0.102515	0.488596	0.0545152	0.0321735	0.521708
759241	MOB3B	9	27527548	27531143	859.075	82	0	0	1	1	1	0	1	ENSG00000120162	4.7513	1.47989	0.0213536	0.0787422	0.458863
709190	AGPAT5	8	6563788	6569025	857.035	83	0	0	1	1	1	1	0	ENSG00000155189	25.9126	4.46861	20.9331	3.74021	0.297159
709190	CTD-2541M15.1	8	6563788	6569025	857.035	83	0	0	1	1	1	1	0	#N/A	#N/A	#N/A	#N/A	#N/A	#N/A
227304	NEK9	14	75592888	75594848	856.605	84	0	1	1	1	1	1	1	ENSG00000119638	13.274	9.59366	13.3505	15.9041	10.7364
227304	RP11-950C14.7	14	75592888	75594848	856.605	84	0	1	1	1	1	1	1	#N/A	#N/A	#N/A	#N/A	#N/A	#N/A
210745	RNASE11	14	21076915	21084877	851.659	85	0	1	1	1	1	1	1	ENSG00000173464	0.0107026	0.0135668	0.0118398	0.0138618	0.0517969
101022	PTPRE	10	129704242	129708517	850.945	86	0	0	0	1	0	0	1	ENSG00000132334	9.3906	74.8626	0.792505	5.38643	521.494
289577	NME1-NME2	17	49213795	49232205	840.652	87	0	1	1	1	1	1	1	ENSG00000243678	38.7234	90.0472	47.7827	19.9772	0.274475
289577	NME2	17	49213795	49232205	840.652	87	0	1	1	1	1	1	1	ENSG00000011052	37.3665	53.2922	56.3702	36.3326	0.124562
289577	NME1	17	49213795	49232205	840.652	87	0	1	1	1	1	1	1	ENSG00000239672	35.3011	14.4702	28.3895	7.48559	0.0578137
733942	DECR1	8	91010880	91017240	838.781	88	0	1	1	1	1	1	1	ENSG00000104325	42.6332	63.5052	40.5254	24.6722	98.8481
733942	NBN	8	91010880	91017240	838.781	88	0	1	1	1	1	1	1	ENSG00000104320	14.5809	36.3225	16.4449	13.484	139.144
618802	HIST1H4K	6	27792447	27801291	835.622	89	0	1	1	1	1	1	1	ENSG00000197914	387.542	30.0496	129.159	21.1429	5.39779
240848	SPRED1	15	38541154	38545509	834.68	90	0	0	1	1	1	0	0	ENSG00000166068	3.34695	11.8254	2.09802	0.0393632	0.235082
618341	HIST1H4H	6	26285060	26288843	823.084	91	0	0	1	1	1	1	0	ENSG00000158406	458.007	66.1849	204.024	42.1531	24.7077
766064	PRKACG	9	71624507	71632801	823.061	92	0	1	1	1	1	1	1	ENSG00000165059	6.30662e-05	3.01209e-07	2.0293e-07	2.99798e-07	1.29391e-06
242719	C15orf48	15	45719061	45723591	822.979	93	1	0	0	1	0	0	0	ENSG00000166920	0.0888846	27.4743	0.146304	0.139065	1.35974
219784	C14orf183	14	50554130	50562914	821.305	94	0	0	1	1	1	1	0	ENSG00000168260	0.000180632	0.0156863	0.0773372	0.0929649	2.50547
219784	RP11-58E21.5	14	50554130	50562914	821.305	94	0	0	1	1	1	1	0	#N/A	#N/A	#N/A	#N/A	#N/A	#N/A
219784	RP11-58E21.7	14	50554130	50562914	821.305	94	0	0	1	1	1	1	0	#N/A	#N/A	#N/A	#N/A	#N/A	#N/A
634408	IBTK	6	82956356	82958617	820.215	95	0	0	1	1	1	1	0	ENSG00000005700	9.44588	21.0775	12.8675	11.4909	0.687476
140327	ADAMTS8	11	130296757	130307018	817.694	96	0	0	1	1	1	1	0	ENSG00000134917	2.70126e-05	0.00105064	2.23182e-05	2.74378e-05	0.000100201
345976	FOXN2	2	48539228	48543709	817.057	97	0	1	1	1	1	1	1	ENSG00000170802	28.449	16.5412	47.3033	19.6592	52.8439
62238	FH	1	241682071	241685450	814.499	98	0	0	1	1	1	1	0	ENSG00000091483	29.1396	51.8722	21.7866	9.12438	0.294943
572732	PLK2	5	57752380	57757252	812.445	99	0	0	1	1	1	1	0	ENSG00000145632	5.47079	1.26182	1.00176	1.66194	9.44247
655522	RP11-162J8.3	6	149352592	149354190	812.019	100	0	1	1	1	1	1	1	#N/A	#N/A	#N/A	#N/A	#N/A	#N/A
171861	APAF1	12	99035902	99040250	810.147	101	0	1	1	1	1	1	1	ENSG00000120868	7.53768	12.4044	8.14923	6.35755	117.111
171861	IKBIP	12	99035902	99040250	810.147	101	0	1	1	1	1	1	1	ENSG00000166130	5.31886	11.4323	5.72304	1.64552	67.8731
720880	SNAI2	8	49832730	49835597	802.465	102	1	0	0	1	0	0	0	ENSG00000019549	3.83985e-05	6.97388e-05	3.22351e-05	3.88102e-05	0.000283244
261884	ERCC4	16	14010747	14017685	799.233	103	0	0	0	1	1	0	0	ENSG00000175595	4.00366	3.81007	3.33637	4.60401	0.874708
261884	RPS26P52	16	14010747	14017685	799.233	103	0	0	0	1	1	0	0	ENSG00000242307	0.000234197	2.01069e-05	2.03997e-06	2.05113e-06	7.62527e-06
596929	JADE2	5	133907439	133923113	796.487	104	0	1	1	1	1	1	1	ENSG00000043143	2.90176	4.30896	6.96811	27.4706	10.5747
559525	FAM105A	5	14579068	14588249	796.424	105	0	0	0	1	0	1	1	ENSG00000145569	5.60416	6.10534	1.04323	13.3964	18.5003
266035	FUS	16	31191436	31198086	795.223	106	0	0	1	1	1	0	1	ENSG00000089280	37.82	14.0452	35.7552	47.6548	106.276
266035	RP11-388M20.6	16	31191436	31198086	795.223	106	0	0	1	1	1	0	1	#N/A	#N/A	#N/A	#N/A	#N/A	#N/A
171839	SLC25A3	12	98986764	98989889	794.832	107	0	1	1	1	1	1	1	ENSG00000075415	169.68	179.868	154.114	117.177	104.014
528082	TET2	4	106064152	106068261	790.145	108	0	1	1	1	1	1	1	ENSG00000168769	9.33652	14.9047	26.6135	6.06575	245.536
385358	ITGA4	2	182319283	182329022	789	109	0	1	1	1	1	1	1	ENSG00000115232	77.4606	16.0505	9.68253	84.0206	27.5095
488643	FNDC3B	3	171755271	171762749	783.972	110	0	0	0	1	0	0	1	ENSG00000075420	6.78032	41.4811	5.52504	13.6104	298.341
438430	BHLHE40	3	5018512	5025724	782.303	111	0	1	1	1	1	1	1	ENSG00000134107	8.87465	22.384	16.2317	1.70115	41.8024
438430	BHLHE40-AS1	3	5018512	5025724	782.303	111	0	1	1	1	1	1	1	ENSG00000235831	0.0377292	0.175312	0.424492	0.158221	0.155368
97090	RNU6-709P	10	115862998	115872187	779.573	112	0	0	1	1	1	0	0	ENSG00000253066	1.90488e-05	2.86798e-05	2.23309e-05	3.04757e-05	8.96467e-05
466198	TBC1D23	3	99975954	99981154	777.83	113	0	1	1	1	1	1	1	ENSG00000036054	19.9571	16.3719	19.3591	10.125	32.819
618801	HIST1H4J	6	27790966	27792446	774.204	114	0	1	1	1	1	1	1	ENSG00000197238	1519.63	149.216	716.802	65.8807	48.1972
136740	DSCAML1	11	117686001	117689951	771.744	115	0	0	0	1	1	0	0	ENSG00000177103	0.000166087	0.000824207	0.000189038	0.0800502	0.000749468
136740	RP11-728F11.3	11	117686001	117689951	771.744	115	0	0	0	1	1	0	0	#N/A	#N/A	#N/A	#N/A	#N/A	#N/A
477867	CEP70	3	138312712	138319219	770.605	116	0	1	1	1	1	1	1	ENSG00000114107	3.75404	7.70319	8.66158	14.4891	1.7834
632164	COL12A1	6	75904747	75916837	769.81	117	0	1	1	1	1	1	1	ENSG00000111799	0.0109899	0.00715289	0.0113552	0.0171386	0.0547544
577337	TNPO1	5	72110275	72113468	769.092	118	0	0	0	1	1	0	0	ENSG00000083312	35.0084	57.2926	24.6369	36.0376	57.515
577337	CTD-2631K10.1	5	72110275	72113468	769.092	118	0	0	0	1	1	0	0	#N/A	#N/A	#N/A	#N/A	#N/A	#N/A
645073	FAM26F	6	116775707	116785467	766.493	119	0	0	0	1	0	0	1	ENSG00000188820	1.92266	3.05036	1.22708	2.34593	24.2776
645073	KRT18P22	6	116775707	116785467	766.493	119	0	0	0	1	0	0	1	ENSG00000218153	4.78581e-05	6.04303e-07	3.22959e-07	3.47155e-07	5.53968e-06
645073	RP1-93H18.6	6	116775707	116785467	766.493	119	0	0	0	1	0	0	1	#N/A	#N/A	#N/A	#N/A	#N/A	#N/A
645073	Z84488.1	6	116775707	116785467	766.493	119	0	0	0	1	0	0	1	#N/A	#N/A	#N/A	#N/A	#N/A	#N/A
675560	TNS3	7	47614634	47624339	763.968	120	0	0	1	1	1	0	0	ENSG00000136205	3.42782	51.162	0.213314	0.0736517	0.102478
618015	LRRC16A	6	25276461	25285841	758.624	121	0	0	1	1	1	1	0	ENSG00000079691	1.94917	1.91271	18.6636	4.47586	0.0447495
345866	FBXO11	2	48130849	48134742	758.243	122	0	1	1	1	1	1	1	ENSG00000138081	19.3103	14.6032	23.2503	24.2542	82.4275
345866	AC079807.2	2	48130849	48134742	758.243	122	0	1	1	1	1	1	1	#N/A	#N/A	#N/A	#N/A	#N/A	#N/A
352323	APLF	2	68691196	68695687	755.651	123	0	1	1	1	1	1	1	ENSG00000169621	2.23288	1.52888	4.71047	2.63441	0.767434
352323	FBXO48	2	68691196	68695687	755.651	123	0	1	1	1	1	1	1	ENSG00000204923	0.848384	0.599994	0.587664	0.542168	0.716829
298632	MYL12B	18	3260099	3263541	751.219	124	0	1	1	1	1	1	1	ENSG00000118680	77.5353	176.974	129.774	101.26	310.234
298632	RP13-270P17.1	18	3260099	3263541	751.219	124	0	1	1	1	1	1	1	#N/A	#N/A	#N/A	#N/A	#N/A	#N/A
266040	PYCARD	16	31209754	31215261	750.8	125	0	0	1	1	1	0	0	ENSG00000103490	8.32526	55.9938	3.38817	4.8614	143.295
266040	C16orf98	16	31209754	31215261	750.8	125	0	0	1	1	1	0	0	ENSG00000261359	0.214215	0.719736	0.144867	0.289912	1.10533
210776	ANG	14	21148274	21153239	749.733	126	0	0	1	1	1	1	0	ENSG00000214274	0.150841	2.07079	0.0933312	0.0253824	0.0215342
210776	RNASE4	14	21148274	21153239	749.733	126	0	0	1	1	1	1	0	ENSG00000258818	0.0431046	1.05907	0.0127867	0.00487885	0.00453085
210776	AL163636.6	14	21148274	21153239	749.733	126	0	0	1	1	1	1	0	#N/A	#N/A	#N/A	#N/A	#N/A	#N/A
69183	TRDMT1	10	17243060	17248253	746.458	127	0	0	0	1	1	1	1	ENSG00000107614	1.72272	2.59438	1.56451	7.5944	8.24737
221748	TMEM260	14	56951756	56956828	741.184	128	0	0	1	1	1	1	0	ENSG00000070269	7.29121	5.30241	6.14112	8.81378	34.5625
200153	SPRY2	13	80909745	80918842	738.812	129	0	0	0	1	1	0	1	ENSG00000136158	3.07235	4.06995	5.39351	0.00395446	0.932898
676377	IKZF1	7	50341186	50347256	731.819	130	0	1	1	1	1	1	1	ENSG00000185811	28.3743	20.3158	7.61835	113.136	127.514
593250	AC093267.1	5	122111880	122113314	731.664	131	0	0	0	1	0	1	0	#N/A	#N/A	#N/A	#N/A	#N/A	#N/A
618815	HIST1H3I	6	27837621	27840381	727.795	132	0	1	1	1	1	1	1	ENSG00000182572	350.999	8.24655	136.959	9.39805	1.42315
446261	TGFBR2	3	30646159	30650167	726.164	133	0	0	0	1	1	1	0	ENSG00000163513	7.94588	29.7935	24.4186	47.2721	192.249
424597	AF124730.4	21	30560019	30560474	726.062	134	0	0	0	1	0	0	1	#N/A	#N/A	#N/A	#N/A	#N/A	#N/A
317561	SOCS6	18	67955334	67962749	725.08	135	1	0	0	1	0	0	0	ENSG00000170677	3.26257	6.30593	5.3269	0.71694	0.0012115
572215	MAP3K1	5	56108371	56117353	724.783	136	0	1	1	1	1	1	1	ENSG00000095015	7.17433	15.3302	4.47576	36.711	111.458
392982	NRP2	2	206543284	206549313	721.924	137	0	0	0	1	1	1	0	ENSG00000118257	0.206968	18.0821	0.326176	0.120739	0.110994
124255	GAB2	11	78126420	78132016	721.72	138	0	1	1	1	1	1	1	ENSG00000033327	2.62643	9.54332	1.21257	0.356508	166.802
699484	MKLN1	7	130793408	130796988	721.625	139	0	1	1	1	1	1	1	ENSG00000128585	22.1673	14.8915	19.9607	32.5078	112.729
699484	LINC-PINT	7	130793408	130796988	721.625	139	0	1	1	1	1	1	1	ENSG00000231721	8.82911	6.13635	5.69408	47.8327	201.71
541952	ARHGAP10	4	148651638	148654092	721.179	140	1	0	0	1	0	0	0	ENSG00000071205	2.07765	11.9903	3.65963	1.23963	0.047085
64664	GTPBP4	10	1033144	1035562	720.475	141	0	0	1	1	1	0	1	ENSG00000107937	17.5169	14.506	16.6265	12.9494	1.81667
64664	AL359878.1	10	1033144	1035562	720.475	141	0	0	1	1	1	0	1	#N/A	#N/A	#N/A	#N/A	#N/A	#N/A
438359	EGOT	3	4792448	4794286	716.714	142	0	0	1	1	1	0	1	ENSG00000235947	0.0152882	0.000943744	1.13528e-05	0.00111292	1.31476e-06
516946	DCK	4	71857527	71859000	713.282	143	0	0	1	1	1	0	0	ENSG00000156136	25.679	10.5391	16.9698	18.5598	5.16128
44700	TEDDM1	1	182366080	182374429	706.139	144	0	1	1	1	1	1	1	ENSG00000203730	2.40277e-05	6.14551e-07	4.09051e-06	2.07892e-07	0.000316583
632179	TMEM30A	6	75992327	76005024	702.751	145	0	1	1	1	1	1	1	ENSG00000112697	16.3732	70.1064	27.2555	20.3866	90.6351
632179	RP1-234P15.4	6	75992327	76005024	702.751	145	0	1	1	1	1	1	1	#N/A	#N/A	#N/A	#N/A	#N/A	#N/A
359137	AC021188.4	2	96986565	96990459	699.794	146	0	1	1	1	1	1	1	#N/A	#N/A	#N/A	#N/A	#N/A	#N/A
158337	ZBTB39	12	57399089	57400611	699.654	147	0	0	1	1	1	0	0	ENSG00000166860	2.79703	1.0749	3.41336	2.08397	0.01698
236431	CYFIP1	15	22889714	22896358	698.398	148	0	0	0	1	1	0	0	ENSG00000068793	4.7229	73.3	23.3706	0.605811	0.198595
625748	RP1-27K12.4	6	53367010	53369768	698.154	149	0	0	1	1	1	0	1	#N/A	#N/A	#N/A	#N/A	#N/A	#N/A
37823	DUSP23	1	159749526	159753587	697.856	150	0	0	1	1	1	0	0	ENSG00000158716	4.94323	24.0078	16.1323	3.13422	11.1188
242710	SPATA5L1	15	45693059	45696304	697.699	151	0	0	1	1	1	1	0	ENSG00000171763	3.63778	4.51477	1.92627	2.92089	15.2724
242710	GATM	15	45693059	45696304	697.699	151	0	0	1	1	1	1	0	ENSG00000171766	1.70893	3.56788	4.88795	0.183666	0.112411
25445	F3	1	95006048	95008258	696.009	152	0	0	0	1	1	0	0	ENSG00000117525	0.496472	6.60596	0.0471419	0.00146919	0.103577
370652	CXCR4	2	136869013	136876153	695.778	153	0	0	0	1	1	1	1	ENSG00000121966	5.40543	15.0957	37.7852	403.355	599.408
747540	WISP1	8	134198047	134211320	695.002	154	0	1	1	1	1	1	1	ENSG00000104415	0.00324849	0.00436081	0.00380915	0.00448032	0.0165146
263144	SYT17	16	19175423	19180808	694.957	155	1	0	0	1	0	0	0	ENSG00000103528	0.0105246	1.47192	0.0179992	0.00926587	0.0416121
710930	RNU6-842P	8	12900927	12906922	694.273	156	0	0	1	1	1	0	0	ENSG00000206996	1.57502e-05	2.80437e-05	2.9739e-05	2.79971e-05	9.30159e-05
223420	HIF1A	14	62157240	62165850	693.247	157	0	1	1	1	1	1	1	ENSG00000100644	25.3632	72.6626	44.1196	42.0459	605.226
223420	HIF1A-AS1	14	62157240	62165850	693.247	157	0	1	1	1	1	1	1	ENSG00000258777	0.000109191	2.95609e-05	0.00110788	1.06778e-05	2.61172e-06
618822	HIST1H2AM	6	27858120	27861034	691.457	158	0	1	1	1	1	1	1	ENSG00000233224	684.801	16.7619	318.562	12.9835	4.26226
618822	HIST1H3J	6	27858120	27861034	691.457	158	0	1	1	1	1	1	1	ENSG00000197153	304.9	1.44116	116.62	1.47262	0.388914
634813	PRSS35	6	84221546	84222871	688.245	159	0	0	1	1	1	0	0	ENSG00000146250	0.00031201	0.000920175	0.00168883	0.000258402	0.000118552
68552	HSPA14	10	14878376	14887218	688.23	160	0	0	0	1	1	1	1	ENSG00000187522	21.2741	14.6317	21.821	13.4349	20.695
68552	CDNF	10	14878376	14887218	688.23	160	0	0	0	1	1	1	1	ENSG00000185267	0.295332	0.248289	0.480951	1.59407	0.0978027
344501	ZFP36L2	2	43450920	43455070	687.774	161	0	0	1	1	1	1	0	ENSG00000152518	23.9376	9.71476	1.78959	42.1581	65.9906
91746	TCTN3	10	97452415	97456998	686.877	162	0	0	0	1	1	0	1	ENSG00000119977	5.74227	8.20307	3.47763	6.82383	0.2921
618816	HIST1H4L	6	27840382	27845139	685.726	163	0	1	1	1	1	1	1	ENSG00000198558	521.795	6.56317	146.719	9.44892	0.933625
608571	BOD1	5	173040111	173048561	683.815	164	0	1	1	1	1	1	1	ENSG00000145919	2.95072	8.49511	2.95335	13.831	1.67473
424476	RNU6-872P	21	30112950	30117523	677.203	165	0	0	1	1	1	1	0	ENSG00000251894	2.54037e-05	4.73786e-05	4.52181e-05	4.76907e-05	0.000132683
135697	NNMT	11	114127328	114130511	674.174	166	0	1	1	1	1	1	1	ENSG00000166741	0.00937446	0.0206702	0.0517763	0.052624	0.0444055
390533	SF3B1	2	198266117	198268819	674.157	167	0	1	1	1	1	1	1	ENSG00000115524	116.648	113.862	109.995	304.617	558.387
483659	TIPARP	3	156385298	156394032	672.641	168	0	0	1	1	1	1	0	ENSG00000163659	17.5943	17.5321	55.7392	12.5413	28.7466
483659	TIPARP-AS1	3	156385298	156394032	672.641	168	0	0	1	1	1	1	0	ENSG00000243926	0.789599	1.07276	1.74294	2.12909	0.0524323
278765	C17orf97	17	256417	262443	672.28	169	0	1	1	1	1	1	1	ENSG00000187624	0.0677635	0.25543	0.0841324	0.0565811	0.354245
278765	AC108004.3	17	256417	262443	672.28	169	0	1	1	1	1	1	1	#N/A	#N/A	#N/A	#N/A	#N/A	#N/A
357407	AC105053.3	2	86038814	86043064	669.479	170	0	0	1	1	1	0	0	#N/A	#N/A	#N/A	#N/A	#N/A	#N/A
768882	GNAQ	9	80637139	80648673	668.782	171	0	1	1	1	1	1	1	ENSG00000156052	16.6449	23.5134	55.5074	12.1009	145.333
1602	SLC45A1	1	8375879	8381244	668.218	172	0	0	0	1	1	1	0	ENSG00000162426	0.0010742	0.018808	0.00504889	0.135543	0.00637168
30213	GPR61	1	110083451	110088718	667.307	173	0	0	1	1	1	1	0	ENSG00000156097	0.0388638	0.0156512	0.00914983	0.126057	0.0471481
30213	RP5-1160K1.8	1	110083451	110088718	667.307	173	0	0	1	1	1	1	0	#N/A	#N/A	#N/A	#N/A	#N/A	#N/A
584689	ELL2	5	95295169	95298801	667.036	174	0	0	1	1	1	0	0	ENSG00000118985	33.2395	14.4841	3.33384	2.59595	16.48
584689	CTD-2337A12.1	5	95295169	95298801	667.036	174	0	0	1	1	1	0	0	#N/A	#N/A	#N/A	#N/A	#N/A	#N/A
726484	RRS1	8	67336948	67343625	664.835	175	0	0	0	1	1	0	0	ENSG00000179041	5.66912	3.88849	2.721	4.713	7.17864e-05
726484	ADHFE1	8	67336948	67343625	664.835	175	0	0	0	1	1	0	0	ENSG00000147576	1.83515	1.28775	4.72616	3.45797	0.177074
726484	RP11-346I3.4	8	67336948	67343625	664.835	175	0	0	0	1	1	0	0	#N/A	#N/A	#N/A	#N/A	#N/A	#N/A
387325	CALCRL	2	188312875	188314531	664.583	176	0	0	1	1	1	0	0	ENSG00000064989	0.649387	1.63643	0.27129	0.491601	0.183773
683099	GSAP	7	77045115	77046867	663.668	177	0	0	0	1	1	0	1	ENSG00000186088	1.87633	13.1613	44.4345	13.6954	12.1769
683099	RP5-899E9.1	7	77045115	77046867	663.668	177	0	0	0	1	1	0	1	#N/A	#N/A	#N/A	#N/A	#N/A	#N/A
266054	RNU7-199P	16	31278701	31279453	660.293	178	1	0	0	1	0	0	0	ENSG00000252876	5.65714e-05	0.000101871	7.9778e-05	7.20988e-05	0.000397589
119460	TIMM10	11	57295377	57298400	659.244	179	0	1	1	1	1	1	1	ENSG00000134809	15.7948	17.7967	12.9067	6.71599	2.88562
696387	CPED1	7	120624850	120629938	658.878	180	0	0	1	1	1	1	0	ENSG00000106034	12.1515	2.91503	1.84843	0.0511007	0.0549188
445208	NEK10	3	27409028	27411081	658.568	181	0	0	1	1	1	1	0	ENSG00000163491	0.0521789	0.239947	0.0905708	0.205694	0.0521953
375143	MMADHC	2	150444008	150449018	658.217	182	0	0	0	1	1	1	0	ENSG00000168288	54.6492	50.8778	42.7865	30.5227	68.2033
651101	RP11-349J5.2	6	135261568	135264260	657.946	183	0	1	1	1	1	1	1	#N/A	#N/A	#N/A	#N/A	#N/A	#N/A
402342	AC105760.3	2	237963367	237973252	657.287	184	0	0	0	1	0	1	0	#N/A	#N/A	#N/A	#N/A	#N/A	#N/A
615820	NHLRC1	6	18122212	18128318	655.56	185	0	0	1	1	1	0	1	ENSG00000187566	0.749051	0.764894	0.766739	0.187492	5.37677e-05
132085	MMP20	11	102473327	102478710	653.773	186	0	0	0	1	1	0	0	ENSG00000137674	0.000547835	0.00245629	0.000624868	0.000666577	0.0022898
132085	RP11-817J15.2	11	102473327	102478710	653.773	186	0	0	0	1	1	0	0	#N/A	#N/A	#N/A	#N/A	#N/A	#N/A
664967	ARL4A	7	12724826	12728593	651.301	187	0	0	1	1	1	0	0	ENSG00000122644	110.677	8.2863	3.41086	6.51248	1.53169
664967	CTD-2320J21.1	7	12724826	12728593	651.301	187	0	0	1	1	1	0	0	#N/A	#N/A	#N/A	#N/A	#N/A	#N/A
759237	IFNK	9	27523764	27525591	649.418	188	0	0	1	1	1	0	1	ENSG00000147896	5.3297e-05	7.90264e-07	3.59205e-07	3.97953e-07	2.9925e-05
445289	EOMES	3	27762062	27764795	648.728	189	0	0	1	1	1	1	0	ENSG00000163508	0.000582148	0.00548819	0.00139549	0.453025	0.00742936
644226	RP11-544L8__B.4	6	114222879	114226021	648.438	190	0	0	1	1	1	0	1	#N/A	#N/A	#N/A	#N/A	#N/A	#N/A
375995	STAM2	2	153029517	153035454	646.434	191	0	1	1	1	1	1	1	ENSG00000115145	9.05212	13.4304	12.1352	5.09232	39.364
144490	CLEC7A	12	10282819	10293885	645.979	192	0	0	0	1	1	0	1	ENSG00000172243	8.11597	38.121	0.249247	0.212564	959.445
29786	VAV3	1	108497627	108507082	642.376	193	0	0	1	1	1	1	0	ENSG00000134215	3.77518	4.21665	17.8277	2.55119	52.5202
29786	VAV3-AS1	1	108497627	108507082	642.376	193	0	0	1	1	1	1	0	ENSG00000230489	0.000169099	0.000220664	0.001728	9.83343e-07	0.00961827
227343	FOS	14	75743350	75750053	641.432	194	0	1	1	1	1	1	1	ENSG00000170345	44.2353	51.5508	60.1355	43.9791	937.091
718265	ZNF703	8	37550253	37566727	639.85	195	0	0	0	1	0	1	0	ENSG00000183779	0.340529	0.373529	0.0337619	2.06436e-05	9.62591e-06
593249	SNX2	5	122109131	122111879	637.719	196	0	0	0	1	0	1	0	ENSG00000205302	34.1647	107.676	36.3369	21.358	51.6862
475234	RNU6-1142P	3	129534610	129544206	637.114	197	0	0	1	1	1	0	0	ENSG00000252786	2.07554e-05	2.95673e-05	3.38294e-05	3.07399e-05	0.000127426
475234	Y_RNA	3	129534610	129544206	637.114	197	0	0	1	1	1	0	0	#N/A	#N/A	#N/A	#N/A	#N/A	#N/A
218210	FKBP3	14	45602375	45606281	636.336	198	0	0	1	1	0	1	1	ENSG00000100442	23.5428	17.9771	21.2872	25.1189	7.02016
218210	FANCM	14	45602375	45606281	636.336	198	0	0	1	1	0	1	1	ENSG00000187790	5.46913	1.54416	3.51526	3.51647	1.80696
647970	HDDC2	6	125619175	125633062	633.796	199	0	0	1	1	1	1	0	ENSG00000111906	7.87233	8.77692	2.89867	6.59848	0.451782
44696	GLUL	1	182354704	182363894	629.236	200	0	1	1	1	1	1	1	ENSG00000135821	361.551	254.509	424.931	14.6194	2047.36
35392	VPS45	1	150038459	150040151	628.926	201	0	0	1	1	1	0	0	ENSG00000136631	8.99194	14.4895	13.8515	10.2441	0.511114
158334	GPR182	12	57387551	57392948	626.777	202	0	0	1	1	1	0	0	ENSG00000166856	5.45583e-05	4.78199e-07	3.31267e-07	1.02971e-06	1.02621e-06
158334	HBCBP	12	57387551	57392948	626.777	202	0	0	1	1	1	0	0	#N/A	#N/A	#N/A	#N/A	#N/A	#N/A
158334	RP11-474N8.5	12	57387551	57392948	626.777	202	0	0	1	1	1	0	0	#N/A	#N/A	#N/A	#N/A	#N/A	#N/A
238601	MTMR10	15	31275232	31284585	623.11	203	0	0	0	1	1	0	1	ENSG00000166912	6.65065	18.6639	12.396	15.1394	147.247
229048	SNORA79	14	81667655	81671398	621.155	204	0	1	1	1	1	1	1	ENSG00000221303	10.0507	4.12896	6.79033	1.43835	3.80186
631572	KCNQ5-AS1	6	73852950	73854769	619.974	205	0	0	1	1	1	1	0	ENSG00000229154	5.0629e-07	7.68558e-07	2.97375e-07	4.7764e-07	1.36169e-06
394357	RPE	2	210863697	210869386	619.635	206	0	1	1	1	1	1	1	ENSG00000197713	14.5851	22.9249	16.493	9.80793	1.3297
276823	CMIP	16	81475083	81484443	619.221	207	0	0	1	1	1	0	1	ENSG00000153815	10.374	3.79662	68.0934	2.52139	67.7328
279285	OR1G1	17	3028791	3031880	617.32	208	0	0	0	1	0	0	1	ENSG00000183024	3.48996e-07	4.76312e-07	3.61102e-07	1.87471e-06	2.04544e-06
120843	TMEM179B	11	62552270	62559742	616.384	209	0	1	1	1	1	1	1	ENSG00000185475	12.8474	27.065	12.3714	10.2754	23.9122
120843	TMEM223	11	62552270	62559742	616.384	209	0	1	1	1	1	1	1	ENSG00000168569	3.58206	4.00344	4.3195	3.09216	0.165967
120843	RP11-727F15.12	11	62552270	62559742	616.384	209	0	1	1	1	1	1	1	#N/A	#N/A	#N/A	#N/A	#N/A	#N/A
632171	COX7A2	6	75954895	75960734	616.361	210	0	0	1	1	0	1	1	ENSG00000112695	99.5703	132.554	150.256	72.4329	53.6419
701990	TBXAS1	7	139472294	139479347	616.067	211	0	0	0	1	1	0	0	ENSG00000059377	10.7088	59.6985	162.986	0.513637	433.675
701990	HIPK2	7	139472294	139479347	616.067	211	0	0	0	1	1	0	0	ENSG00000064393	2.37739	5.47226	28.3063	4.72906	10.7336
408974	SLC24A3	20	19191466	19199335	614.574	212	0	0	1	1	1	0	0	ENSG00000185052	0.59207	0.0560573	15.3864	8.23221e-05	0.428636
408974	RP11-97N19.2	20	19191466	19199335	614.574	212	0	0	1	1	1	0	0	#N/A	#N/A	#N/A	#N/A	#N/A	#N/A
44154	ACBD6	1	180471076	180472609	612.59	213	0	0	1	1	1	1	0	ENSG00000135847	12.5516	8.04989	13.1359	16.8487	1.80932
250012	MIR629	15	70369699	70379374	610.84	214	0	1	1	1	1	1	1	ENSG00000207965	2.33525e-05	2.96059e-05	2.90198e-05	4.41383e-05	0.000129784
560325	BASP1	5	17215151	17220655	609.935	215	0	0	1	1	1	0	0	ENSG00000176788	2.3295	23.4036	3.74562	0.0414384	590.241
560325	AC091878.1	5	17215151	17220655	609.935	215	0	0	1	1	1	0	0	#N/A	#N/A	#N/A	#N/A	#N/A	#N/A
618339	HIST1H2BI	6	26271042	26283090	608.522	216	0	1	1	1	1	1	1	ENSG00000168242	465.187	15.0098	170.638	30.3822	5.2769
618339	HIST1H3G	6	26271042	26283090	608.522	216	0	1	1	1	1	1	1	ENSG00000256018	562.15	1.44009	205.89	0.535966	1.05074
618339	HIST1H2APS4	6	26271042	26283090	608.522	216	0	1	1	1	1	1	1	ENSG00000218690	1.26002	0.00105574	0.256106	0.0105117	0.000603326
364107	ACTR3	2	114645986	114651473	606.299	217	0	1	1	1	1	1	1	ENSG00000115091	96.1264	270.402	198.819	89.792	546.129
364107	RP11-141B14.1	2	114645986	114651473	606.299	217	0	1	1	1	1	1	1	#N/A	#N/A	#N/A	#N/A	#N/A	#N/A
103703	OR56A1	11	6046451	6050970	606.036	218	1	0	0	1	0	0	0	ENSG00000180934	3.69337e-07	4.55824e-06	3.7143e-07	5.65765e-06	0.000162448
666461	AHR	7	17333329	17339625	605.697	219	0	0	0	1	1	1	0	ENSG00000106546	8.35252	45.0101	28.5747	13.0567	1.14055
666461	AC003075.4	7	17333329	17339625	605.697	219	0	0	0	1	1	1	0	#N/A	#N/A	#N/A	#N/A	#N/A	#N/A
776826	ABCA1	9	107684509	107694252	605.551	220	0	0	1	1	0	0	1	ENSG00000165029	0.155374	10.7025	0.0850817	1.58893	63.7468
776826	RP11-217B7.2	9	107684509	107694252	605.551	220	0	0	1	1	0	0	1	#N/A	#N/A	#N/A	#N/A	#N/A	#N/A
246874	ADAM10	15	59040631	59042709	605.179	221	0	0	1	1	1	1	0	ENSG00000137845	27.1058	63.0397	170.494	33.81	184.835
480406	PLSCR5-AS1	3	146305855	146307578	604.561	222	0	0	0	1	0	1	0	ENSG00000241457	9.20769e-07	1.35527e-06	1.18314e-06	1.54765e-06	4.66597e-06
239155		15	33249877	33256595	602.797	223	0	1	0	1	0	0	0	#N/A	#N/A	#N/A	#N/A	#N/A	#N/A
101019	CLRN3	10	129691009	129691805	600.497	224	1	0	0	1	0	0	0	ENSG00000180745	2.72288e-07	0.00110674	3.84955e-07	3.90497e-07	1.8285e-06
720555	SPIDR	8	48635219	48654640	600.314	225	0	0	1	1	0	0	1	ENSG00000164808	8.32109	22.9308	11.0585	17.0158	25.4447
720555	CEBPD	8	48635219	48654640	600.314	225	0	0	1	1	0	0	1	ENSG00000221869	1.46016	7.58722	0.0551514	0.000228612	130.222
35741	CELF3	1	151687246	151690164	600.182	226	0	0	1	1	1	0	0	ENSG00000159409	0.319099	0.0049059	0.00769429	0.00476701	0.0209546
236665	MAGEL2	15	23888995	23894154	599.815	227	0	0	1	1	1	1	0	ENSG00000254585	1.43985e-07	1.88387e-07	1.60907e-07	1.7429e-07	6.80409e-07
236665	AC124309.1	15	23888995	23894154	599.815	227	0	0	1	1	1	1	0	#N/A	#N/A	#N/A	#N/A	#N/A	#N/A
22189	DNASE2B	1	84863031	84864954	599.815	228	0	0	0	1	1	0	0	ENSG00000137976	4.54785e-05	0.70695	0.00038559	6.83401e-05	0.000277044
22189	UOX	1	84863031	84864954	599.815	228	0	0	0	1	1	0	0	ENSG00000240520	9.08418e-05	0.000308242	0.0001129	0.000260757	0.000480363
266104	ARMC5	16	31466454	31469797	598.325	229	0	1	1	1	1	1	1	ENSG00000140691	1.83311	1.50363	3.28115	1.04816	1.09617
423843	ADAMTS1	21	28214457	28218321	597.309	230	0	0	1	1	1	0	0	ENSG00000154734	0.484922	0.00425491	0.327874	0.0311774	0.0226875
363330	BCL2L11	2	111872736	111883621	591.715	231	0	0	1	1	1	0	1	ENSG00000153094	20.3245	3.10714	18.4384	5.42332	37.769
363330	AC096670.3	2	111872736	111883621	591.715	231	0	0	1	1	1	0	1	#N/A	#N/A	#N/A	#N/A	#N/A	#N/A
35709	TUFT1	1	151512436	151516083	590.362	232	0	0	1	1	1	0	0	ENSG00000143367	5.58813	0.952152	0.681724	0.519598	4.77332
35709	RP11-74C1.4	1	151512436	151516083	590.362	232	0	0	1	1	1	0	0	#N/A	#N/A	#N/A	#N/A	#N/A	#N/A
257844	IGF1R	15	99191269	99194977	589.318	233	0	1	1	1	1	1	1	ENSG00000140443	9.48109	3.28324	15.9481	19.2093	129.633
618602	HIST1H4I	6	27106418	27107452	588.268	234	0	0	1	1	1	1	0	ENSG00000198339	76.7592	3.77976	21.857	0.641986	0.560487
218155	KLHL28	14	45426838	45432025	587.584	235	0	1	1	1	1	1	1	ENSG00000179454	4.07371	6.6445	4.49698	13.2615	23.4376
218155	FAM179B	14	45426838	45432025	587.584	235	0	1	1	1	1	1	1	ENSG00000198718	3.8533	4.03309	3.71477	6.23495	2.59125
258635	CHSY1	15	101791053	101798933	586.357	236	0	0	1	1	1	0	1	ENSG00000131873	5.87143	7.81793	11.3178	3.65687	128.814
223391	RP11-47I22.2	14	62036925	62037677	586.026	237	0	0	0	1	0	1	1	#N/A	#N/A	#N/A	#N/A	#N/A	#N/A
223391	RP11-47I22.3	14	62036925	62037677	586.026	237	0	0	0	1	0	1	1	#N/A	#N/A	#N/A	#N/A	#N/A	#N/A
210626	OR4K17	14	20583141	20586214	585.581	238	0	0	1	1	0	1	1	ENSG00000176230	3.33139e-07	4.71604e-07	3.69774e-07	5.29493e-07	1.72988e-06
116607	AC103828.1	11	48028349	48056146	582.679	239	0	0	0	1	0	0	1	#N/A	#N/A	#N/A	#N/A	#N/A	#N/A
36360	RPS27	1	153956792	153974010	581.779	240	0	1	1	1	1	1	1	ENSG00000177954	1591.65	1274.39	1398.45	8962.47	186.74
36360	RAB13	1	153956792	153974010	581.779	240	0	1	1	1	1	1	1	ENSG00000143545	9.6263	16.7854	17.9777	0.0532622	0.439458
36360	RP11-422P24.9	1	153956792	153974010	581.779	240	0	1	1	1	1	1	1	#N/A	#N/A	#N/A	#N/A	#N/A	#N/A
36360	U3	1	153956792	153974010	581.779	240	0	1	1	1	1	1	1	#N/A	#N/A	#N/A	#N/A	#N/A	#N/A
219789	VCPKMT	14	50568416	50584029	579.678	241	0	0	1	1	1	1	0	ENSG00000100483	4.46683	4.10854	2.99083	6.87998	38.0113
461249	GBE1	3	81805809	81811497	578.639	242	0	0	0	1	0	0	1	ENSG00000114480	13.6723	15.0932	13.227	3.87485	23.8175
718428	WHSC1L1	8	38237182	38242579	578.48	243	0	1	1	1	1	1	1	ENSG00000147548	22.4932	14.5518	19.8235	61.1029	88.1471
718428	RP11-350N15.5	8	38237182	38242579	578.48	243	0	1	1	1	1	1	1	#N/A	#N/A	#N/A	#N/A	#N/A	#N/A
495260	OPA1	3	193310436	193312002	578.005	244	1	0	0	1	0	0	0	ENSG00000198836	36.7816	49.3507	54.9013	40.0467	20.566
495260	ATP13A4	3	193310436	193312002	578.005	244	1	0	0	1	0	0	0	ENSG00000127249	0.406369	0.0552346	4.72216	1.35762	0.0440106
495260	RP11-175P19.2	3	193310436	193312002	578.005	244	1	0	0	1	0	0	0	#N/A	#N/A	#N/A	#N/A	#N/A	#N/A
186072	CCNA1	13	36992917	37008543	577.638	245	0	0	1	1	1	0	0	ENSG00000133101	0.347574	1.21564	0.0100256	0.00522058	0.0294466
198700	C13orf45	13	76443598	76447562	576.039	246	0	0	1	1	1	0	0	ENSG00000178734	2.59501e-07	3.55967e-06	3.67587e-07	0.000509904	1.49186e-06
757377	MTAP	9	21801459	21803557	576.026	247	0	0	1	1	1	1	0	ENSG00000099810	10.6449	13.5243	9.58593	11.5374	0.207078
757377	RP11-145E5.5	9	21801459	21803557	576.026	247	0	0	1	1	1	1	0	ENSG00000264545	0.00729387	9.9734e-06	2.29226e-06	9.95613e-07	2.83127e-06
516869	UTP3	4	71549152	71555823	575.137	248	0	0	1	1	1	1	0	ENSG00000132467	9.7281	10.8437	7.18273	5.98912	0.952796
723098	LYN	8	56780974	56794019	574.207	249	0	0	1	1	1	0	1	ENSG00000254087	15.2101	47.4414	42.0733	0.267543	811.54
239157	SNORD77	15	33260620	33268450	574.024	250	1	0	0	1	0	0	0	#N/A	#N/A	#N/A	#N/A	#N/A	#N/A
29787	VAV3	1	108507083	108511712	573.698	251	0	0	1	1	1	1	0	ENSG00000134215	3.77518	4.21665	17.8277	2.55119	52.5202
359124	CIAO1	2	96930538	96932897	573.31	252	0	0	1	1	1	1	0	ENSG00000144021	13.4188	30.9937	14.0594	16.9908	27.9245
359124	TMEM127	2	96930538	96932897	573.31	252	0	0	1	1	1	1	0	ENSG00000135956	5.49954	30.3899	8.94541	4.56704	104.203
158499	CTDSP2	12	58223143	58232637	572.435	253	0	0	1	1	1	1	0	ENSG00000175215	29.1051	27.27	36.783	41.8554	204.354
158499	RP11-620J15.1	12	58223143	58232637	572.435	253	0	0	1	1	1	1	0	#N/A	#N/A	#N/A	#N/A	#N/A	#N/A
618823	HIST1H2BO	6	27861035	27864923	572.162	254	0	0	1	1	1	1	0	ENSG00000196331	489.355	6.83276	204.135	7.07627	7.03871
171137	CDK17	12	96792262	96795604	571.91	255	0	1	1	1	1	1	1	ENSG00000059758	18.196	18.3207	29.3861	39.0732	82.1036
770867	HNRNPK	9	86594077	86596433	571.796	256	0	1	1	1	1	1	1	ENSG00000165119	240.506	224.654	259.756	253.004	578.278
770867	RMI1	9	86594077	86596433	571.796	256	0	1	1	1	1	1	1	ENSG00000178966	6.55186	1.57072	3.75034	0.608199	6.56103
450883	CCR1	3	46249531	46250931	571.313	257	0	0	0	1	1	0	1	ENSG00000163823	1.81142	50.1713	0.106918	1.01797e-05	113.836
353767	STAMBP	2	74055227	74060673	570.505	258	0	1	1	1	1	1	1	ENSG00000124356	9.67624	11.6477	16.0727	8.96681	25.0498
618600	HIST1H2BJ	6	27099102	27106153	569.951	259	0	0	1	1	1	1	0	ENSG00000124635	461.522	11.3946	161.199	13.1824	9.77241
618600	HIST1H2AG	6	27099102	27106153	569.951	259	0	0	1	1	1	1	0	ENSG00000196787	176.062	2.49544	54.4827	9.61067	1.59081
624913	TFAP2B	6	50785086	50786647	568.958	260	0	0	1	1	1	0	1	ENSG00000008196	0.000645851	0.000929948	0.000829697	0.00089867	0.00322003
604542	CCNJL	5	159766712	159776138	567.729	261	0	0	1	1	1	0	1	ENSG00000135083	0.298642	0.0131836	2.36223	0.0204961	100.828
470002	ABHD10	3	111695488	111699177	567.243	262	0	0	1	1	1	1	0	ENSG00000144827	7.01643	20.7981	8.92078	10.4355	1.41123
301452	PSMG2	18	12654588	12662119	564.98	263	0	0	1	1	1	0	0	ENSG00000128789	16.7596	15.1955	13.334	12.2446	4.28763
301452	SPIRE1	18	12654588	12662119	564.98	263	0	0	1	1	1	0	0	ENSG00000134278	2.60736	7.95685	2.28454	0.272151	0.168759
301452	AP005482.1	18	12654588	12662119	564.98	263	0	0	1	1	1	0	0	#N/A	#N/A	#N/A	#N/A	#N/A	#N/A
219748	RNU6-189P	14	50364518	50374508	564.039	264	0	0	1	1	0	1	0	ENSG00000251929	3.4524e-05	3.00014e-05	2.85313e-05	3.16851e-05	0.000127656
293056	AC015923.1	17	61491614	61491812	563.981	265	0	0	1	1	1	0	0	#N/A	#N/A	#N/A	#N/A	#N/A	#N/A
585671	CHD1	5	98216452	98230030	563.78	266	0	1	1	1	0	1	1	ENSG00000153922	30.4201	20.4624	20.6748	55.5774	131.845
585671	RNU6-402P	5	98216452	98230030	563.78	266	0	0	1	1	0	1	1	ENSG00000222610	2.08021e-05	2.79923e-05	2.11625e-05	3.35204e-05	0.000112186
393604	FZD5	2	208630833	208640808	563.305	267	0	0	1	1	1	0	0	ENSG00000163251	6.12748	1.0013	0.757492	0.0168173	0.460777
14015	JUN	1	59245185	59253039	562.252	268	0	1	1	1	1	1	1	ENSG00000177606	18.0765	45.6989	3.52024	26.8872	9.08917
14015	LINC01135	1	59245185	59253039	562.252	268	0	1	1	1	1	1	1	ENSG00000234807	0.0128799	0.24441	0.000328246	0.121598	0.000208172
139778	ETS1	11	128449766	128458801	561.473	269	0	0	0	1	1	1	1	ENSG00000134954	0.499252	1.002	4.90491	325.477	5.20092
357313	CAPG	2	85641313	85648227	560.706	270	0	0	1	1	1	0	1	ENSG00000042493	24.5201	627.699	4.64554	2.95979	20.0246
357313	SH2D6	2	85641313	85648227	560.706	270	0	0	1	1	1	0	1	ENSG00000152292	1.06716	0.0640063	0.0935204	0.0631795	0.2235
254186	RNU6-1280P	15	86189905	86197622	560.605	271	0	0	0	1	1	0	1	ENSG00000202081	1.28578e-05	2.53044e-05	1.94388e-05	2.24647e-05	9.10661e-05
218192	PRPF39	14	45552997	45558290	559.325	272	0	0	1	1	0	1	1	ENSG00000185246	10.9972	7.71428	10.5973	25.5941	3.54561
218192	CTD-3028N15.1	14	45552997	45558290	559.325	272	0	0	1	1	0	1	1	#N/A	#N/A	#N/A	#N/A	#N/A	#N/A
218192	SNORD58	14	45552997	45558290	559.325	272	0	0	1	1	0	1	1	#N/A	#N/A	#N/A	#N/A	#N/A	#N/A
218145	RP11-857B24.5	14	45375425	45383717	558.583	273	0	1	1	1	1	1	1	#N/A	#N/A	#N/A	#N/A	#N/A	#N/A
78347	SGMS1	10	52379566	52392356	558.235	274	0	0	1	1	1	0	0	ENSG00000198964	22.7514	13.9807	24.472	9.02565	18.7654
78347	RP11-50E11.2	10	52379566	52392356	558.235	274	0	0	1	1	1	0	0	#N/A	#N/A	#N/A	#N/A	#N/A	#N/A
78347	RP11-50E11.3	10	52379566	52392356	558.235	274	0	0	1	1	1	0	0	#N/A	#N/A	#N/A	#N/A	#N/A	#N/A
377375	NR4A2	2	157197937	157201343	558.151	275	0	1	1	1	1	1	1	ENSG00000153234	5.9599	0.41308	4.66944	5.58768	7.64385
358108	AC104134.2	2	88836095	88845138	556.475	276	0	1	1	1	1	1	1	#N/A	#N/A	#N/A	#N/A	#N/A	#N/A
150583	TMTC1	12	29669065	29673689	555.38	277	0	0	1	1	1	1	0	ENSG00000133687	0.0257098	2.25111	0.00736814	0.00723997	5.67552
150583	RP11-310I24.1	12	29669065	29673689	555.38	277	0	0	1	1	1	1	0	#N/A	#N/A	#N/A	#N/A	#N/A	#N/A
348163	RNU6-433P	2	55241156	55243362	554.522	278	0	1	1	1	1	1	1	ENSG00000200086	3.33966e-05	2.78046e-05	1.63142e-05	3.30184e-05	8.86471e-05
228969	TSHR	14	81420768	81423583	554.146	279	0	1	1	1	1	1	1	ENSG00000165409	0.0194174	0.0111761	0.432013	0.0172946	0.0388622
612533	snoU13	6	7038449	7043261	553.727	280	0	1	1	1	1	0	0	#N/A	#N/A	#N/A	#N/A	#N/A	#N/A
221161	SAMD4A	14	55030009	55035267	553.458	281	0	0	1	1	1	0	0	ENSG00000020577	0.291176	3.46874	1.31026	0.176124	0.103867
190940	DHRS12	13	52377096	52384957	549.157	282	0	0	1	1	1	1	0	ENSG00000102796	1.03523	3.59908	1.22069	6.53347	62.6409
190940	RP11-327P2.5	13	52377096	52384957	549.157	282	0	0	1	1	1	1	0	#N/A	#N/A	#N/A	#N/A	#N/A	#N/A
614025	HIVEP1	6	12008392	12009075	548.396	283	0	0	0	1	0	1	0	ENSG00000095951	5.00178	4.54591	2.18398	27.4038	48.457
410124	CD93	20	23063909	23070090	547.986	284	0	0	0	1	0	0	1	ENSG00000125810	0.833803	0.506326	0.719765	0.0558836	155.203
31508	OLFML3	1	114520685	114523760	547.764	285	0	0	0	1	1	0	0	ENSG00000116774	0.522465	0.0565876	0.0133363	0.0120086	0.339586
213904	RNU6-541P	14	31607757	31615732	547.577	286	0	0	1	1	1	0	0	ENSG00000207440	2.44853e-05	2.65279e-05	1.74936e-05	2.60284e-05	8.09218e-05
52074	C4BPA	1	207275723	207277802	546.716	287	0	1	1	1	1	1	1	ENSG00000123838	0.00048035	0.00183318	0.000570919	0.000637934	2.92691
89754	CH25H	10	90963423	90967167	544.456	288	0	0	0	1	1	0	0	ENSG00000138135	0.129833	0.0680855	0.0269251	0.00480349	4.68347e-06
56355	HLX	1	221051343	221058921	541.786	289	0	0	0	1	0	0	1	ENSG00000136630	2.92825	9.30133	0.591136	0.0183725	56.4412
56355	HLA-AS1	1	221051343	221058921	541.786	289	0	0	0	1	0	0	1	ENSG00000257551	0.0351445	0.0616512	0.0639206	1.06688e-06	0.0388817
580493	TMEM167A	5	82372432	82374196	541.257	290	0	0	0	1	1	0	1	ENSG00000174695	27.8379	50.1448	39.1227	15.1831	43.6814
580493	XRCC4	5	82372432	82374196	541.257	290	0	0	0	1	1	0	1	ENSG00000152422	5.98424	8.65056	5.56014	2.71356	17.7496
483624	SSR3	3	156271748	156277429	540.605	291	0	0	1	1	1	1	0	ENSG00000114850	44.9461	83.6537	84.6129	19.0656	11.1541
529881	RP11-380D23.1	4	111435499	111440690	540.357	292	0	0	1	1	1	1	0	#N/A	#N/A	#N/A	#N/A	#N/A	#N/A
363818	IL1B	2	113592713	113594483	540.045	293	0	0	0	1	1	0	0	ENSG00000125538	3.59766	18.5711	7.49503	0.0445391	262.948
615252	RNU6-1114P	6	16199919	16205578	539.187	294	0	1	1	1	1	1	1	ENSG00000251831	2.44659e-05	2.62283e-05	3.17733e-05	2.61237e-05	0.000106011
25519	LINC01057	1	95277745	95286959	536.926	295	0	0	1	1	1	0	1	ENSG00000224081	0.0493962	0.091052	0.0428668	0.050814	2.33836
25519	SLC44A3	1	95277745	95286959	536.926	295	0	0	1	1	1	0	1	ENSG00000143036	0.00810969	0.0119264	0.016389	0.0202449	0.175869
223382	RP11-47I22.1	14	62010731	62012529	536.822	296	0	0	0	1	0	1	1	#N/A	#N/A	#N/A	#N/A	#N/A	#N/A
495425	RP11-135A1.2	3	193847776	193849045	536.646	297	0	0	1	1	1	0	0	#N/A	#N/A	#N/A	#N/A	#N/A	#N/A
416678	AC005220.3	20	52556648	52560771	536.251	298	0	0	1	1	1	0	1	#N/A	#N/A	#N/A	#N/A	#N/A	#N/A
170220	NUDT4	12	93767445	93774109	534.992	299	0	0	1	1	1	1	0	ENSG00000173598	464.775	12.8297	33.6639	18.0306	11.0635
170220	RP11-486A14.2	12	93767445	93774109	534.992	299	0	0	1	1	1	1	0	#N/A	#N/A	#N/A	#N/A	#N/A	#N/A
745156	TRIB1	8	126433576	126445817	532.783	300	0	0	1	1	1	0	1	ENSG00000173334	1.90058	9.87431	3.73818	0.22926	195.76
650453	VNN2	6	133084221	133085538	531.675	301	0	0	0	1	0	0	1	ENSG00000112303	0.0513451	10.6666	0.113873	10.0997	1468.78
58621	TMEM78	1	229382957	229389680	531.564	302	0	0	1	1	1	1	0	ENSG00000177800	2.40544e-05	6.72534e-07	1.82977e-07	6.34109e-07	3.5709e-06
762231	SLC25A51	9	37902767	37907347	531.521	303	0	0	1	1	1	0	0	ENSG00000122696	11.0381	12.1766	7.27429	11.9368	8.26082
779300	RGS3	9	116204107	116209215	531.049	304	0	0	1	1	1	1	0	ENSG00000138835	2.17785	3.41626	9.68176	1.6624	36.1986
158502	CTDSP2	12	58236623	58242188	530.795	305	0	0	0	1	1	1	0	ENSG00000175215	29.1051	27.27	36.783	41.8554	204.354
258646	SNRPA1	15	101833589	101835950	530.63	306	0	0	1	1	1	0	1	ENSG00000131876	21.6731	19.002	19.8905	33.2359	4.83501
258646	RP11-299G20.2	15	101833589	101835950	530.63	306	0	0	1	1	1	0	1	#N/A	#N/A	#N/A	#N/A	#N/A	#N/A
644210	MARCKS	6	114177393	114181762	529.684	307	0	0	1	1	1	0	0	ENSG00000155130	1.44465	11.5853	0.422717	0.038829	145.587
733863	RIPK2	8	90768859	90770600	529.662	308	1	0	0	1	0	0	0	ENSG00000104312	4.92882	27.1082	19.5213	2.4648	22.1045
733863	RP11-37B2.1	8	90768859	90770600	529.662	308	1	0	0	1	0	0	0	#N/A	#N/A	#N/A	#N/A	#N/A	#N/A
737908	AZIN1	8	103868858	103879107	529.284	309	0	0	1	1	0	0	1	ENSG00000155096	38.6306	62.4848	47.8109	36.8691	85.8418
737908	KB-1507C5.2	8	103868858	103879107	529.284	309	0	0	1	1	0	0	1	#N/A	#N/A	#N/A	#N/A	#N/A	#N/A
724621	CHD7	8	61589190	61598367	528.894	310	0	1	1	1	1	1	1	ENSG00000171316	7.8756	2.48199	7.30267	14.5773	34.2464
761030	SMU1	9	33075629	33079209	528.59	311	0	1	1	1	1	1	1	ENSG00000122692	24.647	27.5714	27.8276	29.6144	26.9432
492452	EPHB3	3	184275459	184280993	528.486	312	0	0	1	1	1	0	0	ENSG00000182580	0.116744	0.00726524	0.0005912	0.032531	0.0505719
709626	SGK223	8	8238661	8248628	527.66	313	1	0	0	1	0	0	0	#N/A	#N/A	#N/A	#N/A	#N/A	#N/A
743447	DEPTOR	8	120884612	120887475	527.584	314	0	0	1	1	1	1	0	ENSG00000155792	0.613417	0.150134	0.223322	0.605145	0.00269763
743447	KB-1471A8.1	8	120884612	120887475	527.584	314	0	0	1	1	1	1	0	#N/A	#N/A	#N/A	#N/A	#N/A	#N/A
775177	NR4A3	9	102579459	102585189	527.545	315	0	0	0	1	1	0	0	ENSG00000119508	0.740742	2.98609	0.445527	0.106477	0.282855
775177	RP11-554F20.1	9	102579459	102585189	527.545	315	0	0	0	1	1	0	0	#N/A	#N/A	#N/A	#N/A	#N/A	#N/A
631666	SLC17A5	6	74360315	74364870	527.413	316	0	0	1	1	0	1	1	ENSG00000119899	3.07243	24.5272	12.877	3.39737	7.503
437854	CRBN	3	3219514	3227232	523.738	317	0	0	1	1	1	0	0	ENSG00000113851	18.904	17.4457	43.3465	75.2974	28.2402
501057	DCAF16	4	17810109	17813638	522.098	318	0	1	1	1	1	1	1	ENSG00000163257	14.1503	4.89103	13.528	22.3102	8.93579
501057	NCAPG	4	17810109	17813638	522.098	318	0	1	1	1	1	1	1	ENSG00000109805	32.4271	0.742378	17.6894	0.106618	0.238326
382025	GAD1	2	171664227	171675881	521.761	319	0	0	0	1	1	1	0	ENSG00000128683	21.3938	0.0469143	6.64333	0.0247323	0.0941206
382025	AC007405.8	2	171664227	171675881	521.761	319	0	0	0	1	1	1	0	#N/A	#N/A	#N/A	#N/A	#N/A	#N/A
645078	RP11-259P20.1	6	116806798	116815151	521.656	320	0	0	0	1	0	0	1	#N/A	#N/A	#N/A	#N/A	#N/A	#N/A
444654	NGLY1	3	25830915	25831952	520.733	321	0	1	1	1	1	1	1	ENSG00000151092	16.4614	16.6636	19.4822	19.7756	60.0558
444654	OXSM	3	25830915	25831952	520.733	321	0	1	1	1	1	1	1	ENSG00000151093	4.52931	3.32674	4.70267	3.00325	1.40527
519441	snoU13	4	79555295	79565033	520.604	322	0	1	1	1	1	0	1	#N/A	#N/A	#N/A	#N/A	#N/A	#N/A
675576	C7orf65	7	47692283	47697190	520.436	323	1	0	0	1	0	0	0	ENSG00000221845	1.49599e-07	2.46282e-07	1.38568e-07	2.17763e-07	6.19976e-07
340067	FOSL2	2	28614158	28624119	520.369	324	0	0	0	1	1	0	0	ENSG00000075426	5.23739	17.2315	3.95628	2.1961	155.514
340067	AC104695.3	2	28614158	28624119	520.369	324	0	0	0	1	1	0	0	#N/A	#N/A	#N/A	#N/A	#N/A	#N/A
340067	RP11-373D23.2	2	28614158	28624119	520.369	324	0	0	0	1	1	0	0	#N/A	#N/A	#N/A	#N/A	#N/A	#N/A
44808	NPL	1	182757765	182764391	518.886	325	0	0	1	1	1	0	0	ENSG00000135838	21.8159	64.9778	11.5314	1.27675	172.999
507731	KLF3	4	38664202	38668073	517.374	326	0	0	1	1	1	1	0	ENSG00000109787	57.7393	7.17066	13.4215	44.1746	125.288
507731	AC021860.1	4	38664202	38668073	517.374	326	0	0	1	1	1	1	0	#N/A	#N/A	#N/A	#N/A	#N/A	#N/A
507731	RP11-617D20.1	4	38664202	38668073	517.374	326	0	0	1	1	1	1	0	#N/A	#N/A	#N/A	#N/A	#N/A	#N/A
517800	IL8	4	74604292	74606314	515.986	327	0	0	0	1	1	0	1	ENSG00000169429	42.2103	28.1948	216.113	0.0449525	2552.89
631417	KCNQ5	6	73330748	73337110	515.96	328	0	0	1	1	1	0	0	ENSG00000185760	0.882099	0.177248	0.44648	1.52248	0.0915774
223112	RP11-1042B17.5	14	61106403	61107550	515.918	329	0	0	1	1	1	0	0	#N/A	#N/A	#N/A	#N/A	#N/A	#N/A
590982	TMED7	5	114956787	114966357	515.313	330	0	0	1	1	0	1	0	ENSG00000134970	18.7917	38.8887	28.4953	15.9604	23.0599
590982	TICAM2	5	114956787	114966357	515.313	330	0	1	1	1	0	1	0	ENSG00000243414	1.62102	3.47452	0.396675	0.031411	2.80412
590982	TMED7-TICAM2	5	114956787	114966357	515.313	330	0	0	1	1	0	1	0	ENSG00000251201	0.961406	1.6446	0.782582	0.457496	1.31298
731201	FABP5	8	82190272	82195803	514.563	331	1	0	0	1	0	0	0	ENSG00000164687	6.16463	101.461	4.86725	1.46544	0.22749
731201	RP11-363E6.3	8	82190272	82195803	514.563	331	1	0	0	1	0	0	0	#N/A	#N/A	#N/A	#N/A	#N/A	#N/A
268121	PAPD5	16	50175457	50189165	513.719	332	0	0	1	1	0	1	1	ENSG00000121274	3.90936	6.46907	2.09567	8.44891	10.8684
268121	RPL10P14	16	50175457	50189165	513.719	332	0	0	1	1	0	1	1	ENSG00000260031	1.68861e-06	2.77113e-06	2.59038e-06	2.90815e-06	9.57225e-06
268121	SNORA70	16	50175457	50189165	513.719	332	0	0	1	1	0	1	1	ENSG00000207165	#N/A	#N/A	#N/A	#N/A	#N/A
709113	MCPH1	8	6261206	6270887	513.573	333	0	0	1	1	1	1	0	ENSG00000147316	9.03616	6.5719	9.02914	11.2847	1.03404
709113	RP11-115C21.2	8	6261206	6270887	513.573	333	0	0	1	1	1	1	0	#N/A	#N/A	#N/A	#N/A	#N/A	#N/A
371444	SPOPL	2	139256825	139262039	512.442	334	0	0	1	1	1	0	1	ENSG00000144228	5.80938	13.7594	5.73968	4.28922	183.81
371444	AC097721.2	2	139256825	139262039	512.442	334	0	0	1	1	1	0	1	#N/A	#N/A	#N/A	#N/A	#N/A	#N/A
125742	PCF11	11	82867223	82868255	511.78	335	0	1	1	1	1	1	1	ENSG00000165494	29.1246	33.1421	34.597	88.9962	199.927
408599	RRBP1	20	17660712	17672229	510.978	336	0	1	1	1	1	1	1	ENSG00000125844	8.2505	26.2137	19.0977	5.04728	27.5456
425365	TIAM1	21	32926552	32933406	510.255	337	0	0	0	1	1	1	0	ENSG00000156299	1.43177	25.3071	0.229255	19.7056	0.0435936
425365	AP000251.3	21	32926552	32933406	510.255	337	0	0	0	1	1	1	0	#N/A	#N/A	#N/A	#N/A	#N/A	#N/A
357572	CHMP3	2	86738402	86749580	510.201	338	0	1	1	1	1	1	1	ENSG00000115561	19.4808	35.0394	22.2491	31.184	141.732
357572	RNU6-640P	2	86738402	86749580	510.201	338	0	1	1	1	1	1	1	ENSG00000200563	2.16121e-05	2.909e-05	2.22069e-05	2.37641e-05	0.000390944
618791	HIST1H2AI	6	27770375	27776273	510.175	339	0	0	1	1	1	0	0	ENSG00000196747	1019.97	13.0085	461.354	6.52991	6.28729
618791	HIST1H2BL	6	27770375	27776273	510.175	339	0	0	1	1	1	0	0	ENSG00000185130	464.079	8.98337	220.908	5.39849	2.16566
618791	HIST1H4PS1	6	27770375	27776273	510.175	339	0	0	1	1	1	0	0	ENSG00000217862	0.000838043	0.000262843	3.51675e-06	3.35249e-06	1.21149e-05
289005	HOXB-AS3	17	46660464	46668809	506.896	340	0	0	1	1	1	1	0	ENSG00000233101	0.0355555	0.0460385	0.0490579	0.0471214	0.164076
289005	HOXB3	17	46660464	46668809	506.896	340	0	0	1	1	1	1	0	ENSG00000120093	1.27295	0.0261368	1.34026	0.644999	0.0600476
265440	GSG1L	16	28071437	28079494	506.637	341	0	0	1	1	1	0	0	ENSG00000169181	0.00516621	0.0227503	0.00253234	0.00265667	0.15174
613781	RP3-510L9.1	6	11172108	11173987	506.242	342	0	0	0	1	1	1	1	#N/A	#N/A	#N/A	#N/A	#N/A	#N/A
659809	QKI	6	163833365	163837600	503.284	343	0	1	1	1	1	1	1	ENSG00000112531	46.0008	79.2125	54.0181	15.8103	247.88
659809	CAHM	6	163833365	163837600	503.284	343	0	1	1	1	1	1	1	ENSG00000270419	#N/A	#N/A	#N/A	#N/A	#N/A
761014	DNAJA1	9	33022373	33026220	500.963	344	0	0	1	1	1	0	0	ENSG00000086061	59.6929	93.8236	41.235	22.0385	138.393
761014	APTX	9	33022373	33026220	500.963	344	0	0	1	1	1	0	0	ENSG00000137074	11.5534	13.0788	11.4222	8.00164	5.67368
559400	TRIO	5	14141000	14147844	500.858	345	0	0	1	1	1	0	0	ENSG00000038382	7.43192	26.9911	5.44147	0.880233	1.89024
770859	C9orf64	9	86566536	86574615	500.152	346	0	1	1	1	1	1	1	ENSG00000165118	4.79292	5.45062	3.13919	1.1123	1.79065
71614	THNSL1	10	25303478	25306357	499.82	347	0	0	1	1	1	1	0	ENSG00000185875	0.51799	0.254972	1.5182	1.18651	0.000164992
71614	ENKUR	10	25303478	25306357	499.82	347	0	0	1	1	1	1	0	ENSG00000151023	0.0680375	0.00952766	0.733013	0.012981	0.0048686
655586	RP1-111D6.2	6	149561034	149567590	498.849	348	0	0	0	1	0	1	1	#N/A	#N/A	#N/A	#N/A	#N/A	#N/A
705056	GIMAP8	7	150146693	150148514	498.726	349	0	0	0	1	1	1	0	ENSG00000171115	0.338766	1.11307	0.0060502	11.3975	2.42544
757438	CDKN2B	9	22008594	22011170	498.608	350	0	0	0	1	1	0	0	ENSG00000147883	0.428788	1.9532	0.0717362	0.0290949	0.223598
171843	SNORA53	12	98992214	98995286	498.052	351	0	0	1	1	0	1	1	ENSG00000212443	772.926	1105.55	396.925	1440.91	4349.43
171843	SLC25A3	12	98992214	98995286	498.052	351	0	1	1	1	0	1	1	ENSG00000075415	169.68	179.868	154.114	117.177	104.014
289516	RP11-700H6.1	17	49013346	49025312	497.202	352	0	0	0	1	1	1	0	#N/A	#N/A	#N/A	#N/A	#N/A	#N/A
289516	RP11-700H6.2	17	49013346	49025312	497.202	352	0	0	0	1	1	1	0	#N/A	#N/A	#N/A	#N/A	#N/A	#N/A
425831	C21orf54	21	34539805	34547317	497.107	353	0	0	1	1	0	0	0	ENSG00000229086	6.78415e-07	1.03351e-06	7.83282e-07	1.179e-06	1.49772e-05
433990	RP5-1119A7.10	22	36940501	36948598	496.676	354	1	0	0	1	0	0	0	#N/A	#N/A	#N/A	#N/A	#N/A	#N/A
158496	AVIL	12	58210700	58212639	496.229	355	1	0	0	1	0	0	0	ENSG00000135407	0.259631	0.401036	0.385546	0.948346	28.7629
636809	RP11-63K6.7	6	90626455	90630547	495.879	356	0	0	1	1	0	1	1	#N/A	#N/A	#N/A	#N/A	#N/A	#N/A
614106	EDN1	6	12287641	12292195	495.086	357	0	0	1	1	1	0	0	ENSG00000078401	0.0130115	0.0455275	7.28646e-06	0.560987	0.82612
391293	C2orf47	2	200813322	200821129	494.758	358	0	0	1	1	1	1	0	ENSG00000162972	8.61878	8.41667	6.52375	7.48164	2.32731
391293	TYW5	2	200813322	200821129	494.758	358	0	0	1	1	1	1	0	ENSG00000162971	3.24862	3.37072	4.31038	6.32181	2.73803
400909	AC017104.2	2	232316580	232318550	494.491	359	0	0	1	1	1	0	0	#N/A	#N/A	#N/A	#N/A	#N/A	#N/A
289427	CACNA1G	17	48630370	48639413	494.292	360	0	0	0	1	1	0	0	ENSG00000006283	0.00924779	0.0313318	0.0117278	0.00874034	0.0287223
289427	CACNA1G-AS1	17	48630370	48639413	494.292	360	0	0	0	1	1	0	0	ENSG00000250107	0.000581551	0.0023319	0.00058473	0.000792318	0.002609
359251	CNNM4	2	97425684	97428909	492.9	361	0	1	1	1	1	1	1	ENSG00000158158	1.60874	1.93333	1.99246	0.993713	3.49431
242769	SQRDL	15	45926499	45929619	492.793	362	1	0	0	1	0	0	0	ENSG00000137767	11.7552	125.791	7.07632	9.30722	122.388
558337	ANKRD33B-AS1	5	10627491	10629749	492.709	363	0	0	1	1	1	0	1	ENSG00000250106	0.000222626	1.81453e-06	2.72182e-05	1.21929e-06	4.59795e-06
80807	CISD1	10	60026672	60034571	492.593	364	0	0	0	1	0	1	1	ENSG00000122873	6.57141	7.61904	2.76886	3.60232	2.33106
80807	IPMK	10	60026672	60034571	492.593	364	0	0	0	1	0	1	1	ENSG00000151151	1.17902	5.63146	1.12142	2.26265	55.1977
490927	ZNF639	3	179037674	179041914	491.781	365	0	0	1	1	1	1	0	ENSG00000121864	15.7876	7.97461	15.1779	29.2418	2.56365
528070	AC004069.1	4	106024700	106028389	491.596	366	0	0	0	1	0	0	1	#N/A	#N/A	#N/A	#N/A	#N/A	#N/A
528070	SNORA31	4	106024700	106028389	491.596	366	0	0	0	1	0	0	1	ENSG00000199477	#N/A	#N/A	#N/A	#N/A	#N/A
82244	ADO	10	64562869	64568265	490.75	367	0	0	0	1	0	0	1	ENSG00000181915	3.07924	14.5729	4.73828	3.57927	0.374055
82244	RP11-436D10.3	10	64562869	64568265	490.75	367	0	0	0	1	0	0	1	#N/A	#N/A	#N/A	#N/A	#N/A	#N/A
770849	KIF27	9	86534310	86539412	490.536	368	0	1	1	1	1	1	1	ENSG00000165115	2.50331	1.62949	2.39654	6.96054	31.8521
631644	EEF1A1	6	74228212	74234059	490.461	369	0	0	1	1	0	1	1	ENSG00000156508	3357.2	2823.52	2902.94	7662.87	239.171
631644	RP11-505P4.7	6	74228212	74234059	490.461	369	0	0	1	1	0	1	1	#N/A	#N/A	#N/A	#N/A	#N/A	#N/A
229121	STON2	14	81901484	81902953	489.991	370	0	0	1	1	1	0	0	ENSG00000140022	32.115	1.16986	156.547	0.0736903	0.203945
119486	MIR130A	11	57408121	57411419	489.769	371	0	1	1	1	1	1	1	ENSG00000208009	2.48499e-05	4.07321e-05	3.23761e-05	3.42598e-05	0.000132495
439699	RAD18	3	9004696	9010423	488.817	372	0	1	1	1	1	1	1	ENSG00000070950	10.225	4.00429	7.21963	4.89719	4.14571
477869	FAIM	3	138324398	138329194	488.208	373	0	0	1	1	1	1	0	ENSG00000158234	1.07936	16.3736	2.34913	1.34292	0.0811318
280801	GAS7	17	10094567	10102912	487.962	374	0	0	0	1	0	0	1	ENSG00000007237	2.63427	35.4661	0.104054	0.215169	57.362
618317	HIST1H4E	6	26199682	26205858	487.797	375	0	1	1	1	1	1	1	ENSG00000198518	266.075	34.5251	119.385	70.7302	7.15145
618317	HIST1H2BF	6	26199682	26205858	487.797	375	0	1	1	1	1	1	1	ENSG00000197846	192.24	3.42812	91.2966	6.10619	13.8767
618317	RP1-34B20.4	6	26199682	26205858	487.797	375	0	1	1	1	1	1	1	#N/A	#N/A	#N/A	#N/A	#N/A	#N/A
619133	TRIM27	6	28887167	28895834	487.781	376	0	0	1	1	0	0	1	ENSG00000204713	12.0928	17.0912	10.6321	13.7	40.2384
287327	KRT20	17	39041416	39042392	487.466	377	1	0	0	1	0	0	0	ENSG00000171431	0.000120658	0.000153698	0.000143839	0.000172653	0.0413468
344546	RNU6-958P	2	43635223	43635829	486.303	378	0	0	1	1	0	0	0	ENSG00000252804	1.64925e-05	2.61776e-05	2.91016e-05	2.71351e-05	0.000105574
132035	TMEM123	11	102317686	102331168	485.516	379	0	0	0	1	0	1	1	ENSG00000152558	21.764	109.228	61.0217	208.771	122.359
132035	RP11-315O6.1	11	102317686	102331168	485.516	379	0	0	0	1	0	1	1	#N/A	#N/A	#N/A	#N/A	#N/A	#N/A
476454	TOPBP1	3	133371750	133380911	485.369	380	0	0	1	1	0	1	1	ENSG00000163781	34.5609	14.7347	26.7051	16.4532	32.3503
476454	TFP1	3	133371750	133380911	485.369	380	0	0	1	1	0	1	1	ENSG00000242337	0.0909645	0.104354	0.349809	0.123452	0.0612855
49626	C1orf53	1	197874612	197883295	485.297	381	0	0	1	1	1	0	0	ENSG00000203724	0.320547	0.683557	0.112621	0.00875707	0.00544618
49626	LHX9	1	197874612	197883295	485.297	381	0	0	1	1	1	0	0	ENSG00000143355	0.0112071	0.00427828	0.00579106	0.00461547	0.0167247
226749	snoU13	14	73368080	73384529	483.757	382	0	1	1	1	1	1	0	#N/A	#N/A	#N/A	#N/A	#N/A	#N/A
615228	MYLIP	6	16127617	16130346	483.75	383	0	0	1	1	1	0	0	ENSG00000007944	8.57846	5.61155	4.30295	29.097	78.1262
598610	PCDHA2	5	140170289	140178617	482.83	384	0	0	1	1	1	0	0	ENSG00000204969	0.000554995	0.000131038	0.00123432	0.000323579	0.000504987
68564	SUV39H2	10	14919650	14922423	482.602	385	0	0	0	1	1	0	1	ENSG00000152455	7.88399	1.47132	8.48854	2.07917	0.203733
68564	RP11-398C13.6	10	14919650	14922423	482.602	385	0	0	0	1	1	0	1	#N/A	#N/A	#N/A	#N/A	#N/A	#N/A
433740	APOL6	22	36036753	36045628	481.936	386	1	0	0	1	0	0	0	ENSG00000221963	9.71619	17.2233	3.69306	18.4221	40.9647
289575	SPAG9	17	49196498	49200458	481.295	387	0	0	1	1	0	0	1	ENSG00000008294	40.3804	48.5328	24.6853	20.8137	303.411
210676	SNORD126	14	20793945	20795295	481.278	388	0	1	1	1	1	1	1	ENSG00000238344	4.03027e-05	4.82772e-05	5.75557e-05	4.9796e-05	0.000216023
545479	FNIP2	4	159685698	159692559	481.019	389	0	0	1	1	1	1	0	ENSG00000052795	19.3341	41.9593	5.56845	3.54187	0.822049
492451	EIF2B5-AS1	3	184268513	184275458	480.033	390	0	0	1	1	1	0	0	ENSG00000230215	8.85197e-07	3.23008e-05	3.54918e-05	3.8435e-06	0.00242128
297833	AP001178.1	18	601101	603702	479.834	391	1	0	0	1	0	0	0	#N/A	#N/A	#N/A	#N/A	#N/A	#N/A
241475	PLCB2	15	40566825	40581870	479.555	392	0	0	1	1	1	1	0	ENSG00000137841	4.37862	52.4748	41.2579	23.3286	226.997
241475	ANKRD63	15	40566825	40581870	479.555	392	0	0	1	1	1	1	0	ENSG00000230778	0.0117881	0.0810826	0.0921906	3.8725e-07	0.000133938
710558	RP11-148O21.3	8	11408759	11412168	479.056	393	1	0	0	1	0	0	0	#N/A	#N/A	#N/A	#N/A	#N/A	#N/A
710558	RP11-148O21.6	8	11408759	11412168	479.056	393	1	0	0	1	0	0	0	#N/A	#N/A	#N/A	#N/A	#N/A	#N/A
408649	RNU6-192P	20	17882598	17885496	478.796	394	0	0	0	1	1	0	0	ENSG00000212555	1.99685e-05	3.15792e-05	2.94159e-05	3.23338e-05	9.71686e-05
635496	SNX14	6	86302839	86305053	478.595	395	0	0	1	1	0	1	0	ENSG00000135317	17.3636	38.5978	36.3834	24.7224	37.0184
592091	TNFAIP8	5	118600720	118609276	477.501	396	0	1	1	1	1	1	1	ENSG00000145779	13.6875	28.1757	58.5246	115.494	33.6406
516912	GRSF1	4	71704150	71713222	476.897	397	0	0	1	1	0	0	0	ENSG00000132463	27.5692	34.5825	25.265	23.5846	4.02239
223121	SIX1	14	61122629	61125454	476.826	398	0	0	1	1	1	0	0	ENSG00000126778	0.00195818	0.00798718	0.00220155	0.00268965	0.0133779
432939	TIMP3	22	33190122	33206919	476.756	399	0	0	1	1	1	0	0	ENSG00000100234	15.4461	0.323789	85.6298	0.000990013	2.02342e-06
218243	MIS18BP1	14	45711855	45725194	476.36	400	0	0	0	1	0	0	1	ENSG00000129534	26.2958	23.0342	24.2819	10.6828	32.0806
103258	OR52M1	11	4565959	4574314	476.358	401	1	0	0	1	0	0	0	ENSG00000197790	3.69226e-07	1.13084e-06	4.86397e-07	1.77983e-06	0.000225601
627024	PRIM2	6	57178586	57180002	476.293	402	0	0	1	1	1	1	0	ENSG00000146143	10.549	4.17226	6.91763	5.32666	0.925982
760903	NDUFB6	9	32572017	32578512	476.096	403	0	0	1	1	1	0	0	ENSG00000165264	23.4735	28.9151	14.4834	5.42399	36.424
393432	KLF7	2	208024036	208032045	475.991	404	0	0	0	1	1	0	0	ENSG00000118263	3.5816	5.60656	6.8276	14.7027	106.84
52071	C4BPB	1	207260202	207272701	475.972	405	0	1	1	1	1	1	1	ENSG00000123843	0.0123163	0.0109353	0.0131145	0.721384	0.0533096
168895	DUSP6	12	89741722	89751488	474.958	406	0	0	1	1	1	0	1	ENSG00000139318	5.86357	35.5435	22.2766	0.277881	179.31
140226	APLP2	11	129936462	129941230	474.142	407	0	0	1	1	0	0	1	ENSG00000084234	75.5632	400.177	26.8681	10.7249	237.343
140226	AP003041.2	11	129936462	129941230	474.142	407	0	0	1	1	0	0	1	#N/A	#N/A	#N/A	#N/A	#N/A	#N/A
744748	FER1L6-AS1	8	125047296	125058719	473.67	408	0	0	0	1	1	0	0	ENSG00000181171	2.03133e-07	2.18391e-07	1.92784e-05	1.95448e-07	3.35669e-06
744748	RP11-959I15.4	8	125047296	125058719	473.67	408	0	0	0	1	1	0	0	#N/A	#N/A	#N/A	#N/A	#N/A	#N/A
715716	DUSP4	8	29201519	29223254	473.099	409	0	0	0	1	1	1	0	ENSG00000120875	0.268473	0.0417336	0.0343337	0.221514	0.0431226
715716	RP4-676L2.1	8	29201519	29223254	473.099	409	0	0	0	1	1	1	0	#N/A	#N/A	#N/A	#N/A	#N/A	#N/A
527412	BDH2	4	104020108	104023520	473.078	410	0	0	1	1	1	1	0	ENSG00000164039	2.00832	8.53327	1.56878	10.6172	0.457465
76935	NPY4R	10	47081572	47089303	472.391	411	0	0	1	1	1	0	0	ENSG00000204174	3.99448e-05	0.000157473	3.88795e-05	8.48235e-05	0.00016856
718445	FGFR1	8	38317989	38328283	472.113	412	0	0	0	1	0	0	0	ENSG00000077782	0.97833	9.15294	0.238939	1.39152	0.607585
702911	TAS2R40	7	142916049	142919633	471.122	413	0	0	0	1	0	0	1	ENSG00000221937	4.75021e-07	7.9086e-07	4.54376e-07	5.69585e-07	0.026977
702911	AC073342.1	7	142916049	142919633	471.122	413	0	0	0	1	0	0	1	#N/A	#N/A	#N/A	#N/A	#N/A	#N/A
280782	AC000003.1	17	9972695	9976981	470.754	414	0	0	0	1	0	0	1	#N/A	#N/A	#N/A	#N/A	#N/A	#N/A
557473	MTRR	5	7867714	7870080	470.524	415	0	0	0	1	0	1	0	ENSG00000124275	6.28552	11.7498	8.38877	19.1956	2.2026
557473	FASTKD3	5	7867714	7870080	470.524	415	0	0	0	1	0	1	0	ENSG00000124279	4.41271	4.5165	3.60332	3.66464	0.855077
400910	SNORA75	2	232318551	232321429	470.272	416	0	0	1	1	1	0	0	ENSG00000206885	26.6781	10.08	8.82507	10.367	86.9822
400910	SNORD20	2	232318551	232321429	470.272	416	0	0	1	1	1	0	0	ENSG00000207280	2.54319e-05	5.45304e-05	3.25042e-05	4.57481e-05	0.000147719
298716	DLGAP1-AS1	18	3589222	3595009	470.068	417	0	0	1	1	1	0	0	ENSG00000177337	2.53641	2.43002	1.89065	3.1362	8.05186
151345	KIAA1551	12	32111561	32113963	469.9	418	0	1	1	1	1	1	1	ENSG00000174718	26.6472	21.5375	7.41242	91.7632	837.006
756550	HAUS6	9	19096942	19105169	467.342	419	0	0	1	1	1	1	0	ENSG00000147874	14.3508	3.92477	8.4257	7.3159	2.75775
458242	AC112219.1	3	72310003	72312584	466.789	420	0	0	1	1	1	0	0	#N/A	#N/A	#N/A	#N/A	#N/A	#N/A
126741	RNU6-560P	11	85863369	85870921	466.089	421	0	0	1	1	0	0	1	ENSG00000200877	1.88781e-05	2.53964e-05	2.22922e-05	2.70835e-05	0.000106506
493316	SST	3	187386645	187390966	465.782	422	0	0	1	1	1	0	0	ENSG00000157005	9.6089e-07	8.31862e-07	8.25393e-07	3.48382e-06	4.11289e-06
293211	SNORA76	17	62222582	62224253	465.55	423	0	0	1	1	1	1	0	ENSG00000266402	15.2892	1.93084	10.4775	15.1396	0.460169
293211	SNORD104	17	62222582	62224253	465.55	423	0	0	1	1	1	1	0	ENSG00000199753	1.58889	0.000596421	7.57663e-05	0.0668959	0.00463214
470045	C3orf52	3	111829537	111836549	464.623	424	0	0	1	1	1	1	0	ENSG00000114529	0.266165	0.0144149	6.78472	0.317835	0.0288502
470045	MIR567	3	111829537	111836549	464.623	424	0	0	1	1	1	1	0	ENSG00000207940	3.37565e-05	3.50257e-05	2.72142e-05	3.51946e-05	0.000111822
183631	POMP	13	29230456	29236243	464.172	425	0	0	0	1	1	0	0	ENSG00000132963	40.3771	54.7159	35.666	8.07059	22.2576
266032	PRSS36	16	31158850	31168295	463.977	426	0	0	0	1	1	0	0	ENSG00000178226	0.257475	1.15852	1.05224	0.125019	1.43398
604427	ADRA1B	5	159341749	159345488	463.745	427	0	0	1	1	1	0	0	ENSG00000170214	1.28942e-07	4.57383e-07	2.92937e-07	2.61379e-07	9.38927e-07
596239	AC034228.3	5	131338044	131341756	463.575	428	0	0	1	1	1	1	0	#N/A	#N/A	#N/A	#N/A	#N/A	#N/A
280005	AIPL1	17	6337132	6345436	461.17	429	0	0	0	1	1	0	0	ENSG00000129221	0.00679281	0.00967157	0.0079375	0.00914456	0.0465124
104444	SCARNA20	11	8575512	8579316	461.167	430	1	0	0	1	0	0	0	ENSG00000252577	#N/A	#N/A	#N/A	#N/A	#N/A
477158	MSL2	3	135913712	135916257	461.086	431	0	1	1	1	1	1	1	ENSG00000174579	12.1975	5.99945	11.1504	27.8167	56.1853
625422	EFHC1	6	52280078	52286637	460.971	432	0	1	1	1	1	1	1	ENSG00000096093	2.32909	1.25879	1.73164	1.69568	2.92454
65802	AKR1C3	10	5135512	5137754	460.838	433	0	0	1	1	1	0	0	ENSG00000196139	23.9026	0.860249	0.128794	1.11503	0.242901
65802	U8	10	5135512	5137754	460.838	433	0	0	1	1	1	0	0	#N/A	#N/A	#N/A	#N/A	#N/A	#N/A
783503	NTMT1	9	132368783	132383163	460.159	434	0	1	1	1	1	1	1	ENSG00000148335	8.90514	9.58781	3.87816	8.4594	3.50441
783503	C9orf50	9	132368783	132383163	460.159	434	0	1	1	1	1	1	1	ENSG00000179058	2.12791e-07	9.11457e-06	7.48173e-06	1.22875e-06	9.74234e-07
289015	HOXB8	17	46692325	46693111	459.954	435	0	0	1	1	1	0	0	ENSG00000120068	0.0146434	0.0034903	0.00336728	0.00329511	0.0121653
416606	ZNF217	20	52225205	52226927	459.923	436	0	1	1	1	1	1	1	ENSG00000171940	17.5282	12.6259	10.215	17.9169	106.212
218142	C14orf28	14	45366137	45370009	459.131	437	0	1	1	1	1	1	1	ENSG00000179476	0.573255	0.917551	0.72698	1.82167	2.19983
218142	RP11-857B24.1	14	45366137	45370009	459.131	437	0	1	1	1	1	1	1	#N/A	#N/A	#N/A	#N/A	#N/A	#N/A
728173	U8	8	72720240	72728320	458.428	438	0	0	0	1	1	0	0	#N/A	#N/A	#N/A	#N/A	#N/A	#N/A
444614	TOP2B	3	25702828	25707043	457.859	439	0	0	1	1	0	1	0	ENSG00000077097	37.4589	30.8749	72.2739	68.4267	43.51
444614	MIR4442	3	25702828	25707043	457.859	439	0	0	1	1	0	1	0	ENSG00000264219	6.20037e-05	7.9716e-05	4.89122e-05	7.52355e-05	0.000196124
619798	EHMT2	6	31851517	31855313	457.812	440	0	0	1	1	1	0	1	ENSG00000204371	5.8508	6.39987	8.74965	9.02763	1.9484
619798	EHMT2-AS1	6	31851517	31855313	457.812	440	0	0	1	1	1	0	1	ENSG00000237080	3.55215e-06	5.05554e-06	4.30712e-06	4.9018e-06	1.77157e-05
585081	LIX1	5	96476902	96485568	457.551	441	0	1	1	1	1	1	1	ENSG00000145721	5.06004e-05	0.00069389	0.00160994	6.95885e-05	0.000441733
180690	ZNF268	12	133706248	133713251	457.178	442	0	0	1	1	1	1	0	ENSG00000090612	4.76001	5.55531	6.63587	9.02403	2.63487
180690	ZNF10	12	133706248	133713251	457.178	442	0	0	1	1	1	1	0	ENSG00000256223	1.91236	0.730531	2.69538	4.8477	0.811066
180690	ZNF891	12	133706248	133713251	457.178	442	0	0	1	1	1	1	0	ENSG00000214029	1.15909	0.509731	1.35089	4.51618	0.471026
180690	CTD-2140B24.4	12	133706248	133713251	457.178	442	0	0	1	1	1	1	0	ENSG00000256825	7.86199e-07	2.41872e-06	1.5835e-06	1.14398e-06	6.81509e-06
158498	CTDSP2	12	58212900	58223142	457.175	443	0	0	0	1	1	0	0	ENSG00000175215	29.1051	27.27	36.783	41.8554	204.354
158498	MIR26A2	12	58212900	58223142	457.175	443	0	0	0	1	1	0	0	ENSG00000207789	3.99632e-05	4.69785e-05	4.78951e-05	4.60239e-05	0.000171694
163029	ZFC3H1	12	72056566	72058230	457.131	444	0	0	0	1	0	1	1	ENSG00000133858	17.1983	15.0519	19.3064	25.8421	98.3813
163029	THAP2	12	72056566	72058230	457.131	444	0	0	0	1	0	1	1	ENSG00000173451	1.29606	3.21495	1.4423	4.07815	2.08094
116703	OR4C5	11	48386729	48389031	456.19	445	0	0	1	1	0	0	0	ENSG00000176540	5.34435e-07	5.71035e-07	3.8393e-07	5.60005e-07	2.18309e-06
223376	PRKCH	14	61993144	62000094	456.075	446	0	0	0	1	0	1	1	ENSG00000027075	0.604076	7.73484	0.410428	89.4478	10.1431
223376	RP11-47I22.4	14	61993144	62000094	456.075	446	0	0	0	1	0	1	1	ENSG00000258989	1.05945e-06	3.46632e-06	8.47869e-07	6.48643e-05	7.40129e-06
448345	ITGA9	3	37491380	37496863	455.973	447	0	0	0	1	1	0	0	ENSG00000144668	0.311666	0.0678066	0.130238	0.0382123	0.206737
130040	MAML2	11	96072441	96080453	455.65	448	0	0	0	1	0	1	1	ENSG00000184384	0.584902	6.21514	0.298802	20.3091	20.6792
130040	MIR1260B	11	96072441	96080453	455.65	448	0	0	0	1	0	1	1	ENSG00000266192	3.15847e-05	4.273e-05	2.84123e-05	3.43237e-05	0.000150016
728860	UBE2W	8	74788626	74792096	455.604	449	0	0	0	1	1	1	1	ENSG00000104343	4.52602	21.9199	12.5551	5.69411	55.5851
728860	RP11-463D19.2	8	74788626	74792096	455.604	449	0	0	0	1	1	1	1	ENSG00000258677	1.06258	6.25606	2.61253	0.0245293	0.254242
501979	PACRGL	4	20691704	20700329	455.602	450	1	0	0	1	0	0	0	ENSG00000163138	3.14106	4.36235	2.34051	5.43337	1.43704
759254	C9orf72	9	27572920	27576709	454.805	451	1	0	0	1	0	0	0	ENSG00000147894	7.25713	18.6217	5.52268	14.4651	181.892
210678	CCNB1IP1	14	20795320	20806783	454.697	452	0	1	1	1	1	1	1	ENSG00000100814	9.28081	5.74974	26.0186	11.6479	0.662568
337608	OSR1	2	19551658	19560016	453.498	453	0	0	1	1	1	1	0	ENSG00000143867	0.00143805	0.000691284	0.000652767	0.00071886	0.00352472
289572	snoU13	17	49171578	49182944	452.252	454	0	1	0	1	0	0	1	#N/A	#N/A	#N/A	#N/A	#N/A	#N/A
30214	GNAI3	1	110088719	110094876	451.779	455	0	0	1	1	1	0	0	ENSG00000065135	22.4925	37.4634	22.5436	14.1812	131.71
140208	PRDM10	11	129862357	129873115	450.326	456	0	0	1	1	0	0	1	ENSG00000170325	2.40807	2.2706	1.53761	2.1647	9.84774
140208	LINC00167	11	129862357	129873115	450.326	456	0	0	1	1	0	0	1	ENSG00000233220	0.189171	0.365232	0.0421562	0.235267	3.00698
55578	TGFB2	1	218516401	218521986	449.737	457	0	0	0	1	1	0	0	ENSG00000092969	0.0539754	0.0303773	0.238346	0.00955079	0.00323365
55578	RP11-224O19.2	1	218516401	218521986	449.737	457	0	0	0	1	1	0	0	#N/A	#N/A	#N/A	#N/A	#N/A	#N/A
219773	RP11-58E21.3	14	50500285	50509284	449.712	458	1	0	0	1	0	0	0	#N/A	#N/A	#N/A	#N/A	#N/A	#N/A
226747	DPF3	14	73358775	73363237	449.644	459	0	0	0	1	1	1	0	ENSG00000205683	5.06216	0.0474214	0.419053	0.145927	0.117127
33335	ADAM30	1	120431471	120440812	449.123	460	0	0	1	1	0	0	0	ENSG00000134249	1.23657e-07	1.49582e-06	1.48249e-07	9.3562e-06	0.0140898
410108	RP4-753D10.3	20	23011171	23013052	447.848	461	0	0	0	1	0	0	1	#N/A	#N/A	#N/A	#N/A	#N/A	#N/A
410108	RP4-753D10.5	20	23011171	23013052	447.848	461	0	0	0	1	0	0	1	#N/A	#N/A	#N/A	#N/A	#N/A	#N/A
644239		6	114258544	114263063	447.523	462	0	1	0	1	0	0	0	#N/A	#N/A	#N/A	#N/A	#N/A	#N/A
34299	ANKRD35	1	145546608	145551233	447.464	463	0	1	1	1	1	1	1	ENSG00000198483	0.0605043	0.067849	0.236021	0.00490205	0.00073529
96744	TCF7L2	10	114706031	114714217	447.447	464	1	0	0	1	0	0	0	ENSG00000148737	0.3552	1.54769	0.572894	0.233818	14.3309
96744	RP11-57H14.2	10	114706031	114714217	447.447	464	1	0	0	1	0	0	0	#N/A	#N/A	#N/A	#N/A	#N/A	#N/A
680415	TPST1	7	65664008	65672522	445.363	465	1	0	0	1	0	0	0	ENSG00000169902	0.211066	2.8697	0.906073	2.21092	20.7385
450684	LARS2-AS1	3	45549842	45551539	444.956	466	0	0	1	1	1	0	0	ENSG00000232455	1.11377e-06	9.30676e-07	9.12291e-07	9.72732e-07	3.87099e-06
618286	HIST1H2BB	6	26034592	26050868	444.858	467	0	1	1	1	1	1	1	ENSG00000196226	421.072	3.33415	161.491	4.60881	1.28537
618286	HIST1H3C	6	26034592	26050868	444.858	467	0	1	1	1	1	1	1	ENSG00000196532	857.674	2.1621	259.971	2.73845	1.8322
618286	U91328.2	6	26034592	26050868	444.858	467	0	1	1	1	1	1	1	#N/A	#N/A	#N/A	#N/A	#N/A	#N/A
52057	YOD1	1	207226202	207226352	443.915	468	0	1	1	1	1	1	1	ENSG00000180667	38.215	4.0025	24.3564	5.61075	15.5242
178604	NCOR2	12	125048886	125056455	443.164	469	1	0	0	1	0	0	0	ENSG00000196498	10.9506	9.11847	10.0705	6.28598	16.4415
36348	GATAD2B	1	153893802	153902760	443.106	470	0	0	1	1	1	0	0	ENSG00000143614	5.16231	2.54425	4.3394	4.5348	23.2026
723103	SNORA1	8	56812601	56820710	441.4	471	0	0	1	1	1	0	1	ENSG00000206834	#N/A	#N/A	#N/A	#N/A	#N/A
618824	RNU7-26P	6	27864924	27865483	440.863	472	0	0	1	1	1	1	0	ENSG00000238610	8.86016e-05	8.0228e-05	8.96501e-05	6.70714e-05	0.00025138
402172	IQCA1	2	237396470	237420944	439.962	473	1	0	0	1	0	0	0	ENSG00000132321	0.00536727	0.00985395	0.00780521	0.0999605	0.0260032
44747	RGS16	1	182567651	182590376	439.705	474	0	0	1	1	1	0	0	ENSG00000143333	2.79885	0.336564	3.80447	0.141713	0.0893676
44747	RP11-317P15.4	1	182567651	182590376	439.705	474	0	0	1	1	1	0	0	#N/A	#N/A	#N/A	#N/A	#N/A	#N/A
668944	OSBPL3	7	25019105	25021358	438.272	475	0	0	1	1	1	0	0	ENSG00000070882	11.1056	4.86092	13.7579	5.59049	0.129094
635504	SYNCRIP	6	86350239	86354230	438.222	476	0	0	1	1	0	1	1	ENSG00000135316	29.0688	29.1511	33.5339	24.8067	6.81828
112583	ABTB2	11	34376256	34385647	438.206	477	0	0	1	1	1	1	0	ENSG00000166016	0.129149	0.406199	0.0306676	0.0521018	1.66795
728887	TCEB1	8	74881833	74889014	437.504	478	0	0	0	1	1	1	1	ENSG00000154582	27.0009	68.6741	28.349	10.7889	20.8226
728887	TMEM70	8	74881833	74889014	437.504	478	0	0	0	1	1	1	1	ENSG00000175606	9.50049	31.6285	7.46944	5.72207	14.6033
139773	RP11-1007G5.2	11	128395636	128401060	436.244	479	0	0	0	1	1	1	1	#N/A	#N/A	#N/A	#N/A	#N/A	#N/A
289491	WFIKKN2	17	48910833	48914584	435.99	480	0	0	0	1	0	1	0	ENSG00000173714	2.27748e-05	0.0133706	0.00136588	0.000117658	0.0127146
408664	SNX5	20	17946510	17951709	434.468	481	0	0	1	1	1	1	0	ENSG00000089006	58.7757	64.3763	50.5761	21.2522	4.57019
408664	MGME1	20	17946510	17951709	434.468	481	0	0	1	1	1	1	0	ENSG00000125871	16.9845	8.41036	16.87	3.16768	8.76519
744475	DERL1	8	124049135	124055921	433.979	482	0	0	1	1	0	1	1	ENSG00000136986	16.6361	33.2753	20.3491	11.1318	23.3465
744475	TBC1D31	8	124049135	124055921	433.979	482	0	0	1	1	0	1	1	ENSG00000156787	10.2586	5.74504	6.83452	10.0556	1.24232
239059	SCG5	15	32962149	32967506	433.949	483	0	0	0	1	1	0	0	ENSG00000166922	0.411819	0.630793	0.261491	0.0708784	0.0396302
239059	RP11-1000B6.2	15	32962149	32967506	433.949	483	0	0	0	1	1	0	0	#N/A	#N/A	#N/A	#N/A	#N/A	#N/A
211915	STXBP6	14	25513580	25521064	433.891	484	0	0	1	1	0	0	0	ENSG00000168952	0.268905	0.0128989	0.0552821	0.00479577	0.0171978
388689	NABP1	2	192541324	192543281	433.63	485	0	0	0	1	0	1	0	ENSG00000173559	10.2742	109.481	15.7478	9.38037	770.441
479278	SLC9A9-AS1	3	143056093	143063040	433.45	486	1	0	0	1	0	0	0	ENSG00000240012	0.00012739	2.13369e-05	2.77898e-05	0.000866502	4.2578e-06
689975	ARPC1A	7	98921124	98927016	432.559	487	0	0	1	1	1	0	0	ENSG00000241685	17.1569	20.9794	19.5278	9.17858	35.5809
51179	OPTC	1	203459656	203475784	432.421	488	1	0	0	1	0	0	0	ENSG00000188770	9.3147e-05	0.00013154	9.93035e-05	0.000109664	0.000397435
78339	RMRPP4	10	52342290	52353880	431.121	489	0	0	1	1	0	0	0	ENSG00000251950	0.301467	0.000395094	0.0105908	0.000181813	0.00466636
78339	RNU7-107P	10	52342290	52353880	431.121	489	0	0	1	1	0	0	0	ENSG00000238523	5.77261e-05	8.35417e-05	6.47586e-05	8.33059e-05	0.000284351
395443	IKZF2	2	214011340	214018497	430.647	490	0	0	1	1	1	0	0	ENSG00000030419	0.65895	0.953025	0.223007	4.00546	0.177348
395443	RP11-105N14.1	2	214011340	214018497	430.647	490	0	0	1	1	1	0	0	#N/A	#N/A	#N/A	#N/A	#N/A	#N/A
65240		10	3268256	3285527	430.474	491	0	1	1	1	1	1	0	#N/A	#N/A	#N/A	#N/A	#N/A	#N/A
126778	C11orf73	11	86009291	86014043	429.939	492	0	1	1	1	1	1	1	ENSG00000149196	17.9686	13.1109	18.5091	11.4929	2.98679
2518	AADACL4	1	12700924	12716452	429.268	493	0	0	1	1	1	1	0	ENSG00000204518	3.18512e-07	2.80905e-07	3.94845e-07	3.67421e-07	1.15569e-06
663419	GLCCI1	7	8007422	8012181	429.166	494	0	1	1	1	1	1	1	ENSG00000106415	5.59394	0.868178	5.01116	8.81012	16.0239
663419	AC006042.7	7	8007422	8012181	429.166	494	0	1	1	1	1	1	1	#N/A	#N/A	#N/A	#N/A	#N/A	#N/A
697341	RNU6-11P	7	123427549	123433188	429.078	495	1	0	0	1	0	0	0	ENSG00000201104	0.00360348	0.00571204	0.000669348	0.000613168	0.00357949
359139	NCAPH	2	96997113	97002286	428.934	496	0	1	1	1	1	1	1	ENSG00000121152	27.4874	21.2852	14.048	0.0611294	0.315067
374592	AC009480.3	2	148659912	148660536	428.201	497	0	0	0	1	1	1	0	#N/A	#N/A	#N/A	#N/A	#N/A	#N/A
359099	DUSP2	2	96804799	96811949	428.108	498	0	1	1	1	1	1	1	ENSG00000158050	2.10994	48.8456	0.829444	11.5631	16.6181
503444	CCDC149	4	24975857	24991738	427.131	499	1	0	0	1	0	0	0	ENSG00000181982	0.136381	2.57004	0.0324152	0.0350064	1.98013
392374	RNU6-474P	2	204645452	204648167	427.05	500	1	0	0	1	0	0	0	ENSG00000206970	1.44206e-05	2.97922e-05	2.87697e-05	3.10001e-05	9.54113e-05
149445	BHLHE41	12	26276615	26280293	426.731	501	0	0	0	1	1	0	0	ENSG00000123095	0.00955366	2.67461	0.0058397	0.00899029	0.00780376
149445	RP11-283G6.3	12	26276615	26280293	426.731	501	0	0	0	1	1	0	0	#N/A	#N/A	#N/A	#N/A	#N/A	#N/A
688041	CDK6	7	92460612	92467461	426.552	502	0	0	1	1	1	1	0	ENSG00000105810	18.8257	2.99849	14.0284	19.8449	1.60897
688041	AC002454.1	7	92460612	92467461	426.552	502	0	0	1	1	1	1	0	#N/A	#N/A	#N/A	#N/A	#N/A	#N/A
85578	RP11-77G23.2	10	76784440	76785161	426.316	503	0	0	1	1	1	1	0	#N/A	#N/A	#N/A	#N/A	#N/A	#N/A
757436	CDKN2B	9	21991197	22008507	425.486	504	0	0	0	1	1	0	0	ENSG00000147883	0.428788	1.9532	0.0717362	0.0290949	0.223598
757436	CDKN2A	9	21991197	22008507	425.486	504	0	0	0	1	1	0	0	ENSG00000147889	1.24776	1.34131	1.47396	0.105733	0.174473
757436	CDKN2B-AS1	9	21991197	22008507	425.486	504	0	0	0	1	1	0	0	ENSG00000240498	0.248619	0.296345	0.225381	0.0756616	0.265508
757436	RP11-149I2.4	9	21991197	22008507	425.486	504	0	0	0	1	1	0	0	#N/A	#N/A	#N/A	#N/A	#N/A	#N/A
3666	PADI2	1	17441219	17449501	425.282	505	0	0	1	1	1	0	1	ENSG00000117115	0.743962	3.54204	0.00310815	0.00685743	224.362
132092	MMP20	11	102495530	102496252	425.255	506	0	0	0	1	1	0	0	ENSG00000137674	0.000547835	0.00245629	0.000624868	0.000666577	0.0022898
262005	MIR193B	16	14397535	14400648	424.634	507	0	0	1	1	1	1	0	ENSG00000207639	4.48563e-05	4.95269e-05	4.61457e-05	4.23049e-05	0.000174056
398171	AC010980.2	2	223182946	223186906	423.948	508	0	0	0	1	1	0	0	#N/A	#N/A	#N/A	#N/A	#N/A	#N/A
398171	RP11-384O8.1	2	223182946	223186906	423.948	508	0	0	0	1	1	0	0	#N/A	#N/A	#N/A	#N/A	#N/A	#N/A
178559	FAM101A	12	124765999	124773787	423.754	509	0	0	0	1	1	0	0	ENSG00000178882	0.00195127	0.000987487	0.000703598	0.0027465	0.00428636
598693	PCDHB7	5	140546581	140556610	422.969	510	1	0	0	1	0	0	0	ENSG00000113212	1.17022e-07	1.33105e-07	1.07927e-07	4.70611e-07	4.84565e-07
710559	BLK	8	11412169	11420464	422.767	511	1	0	0	1	0	0	0	ENSG00000136573	0.00355645	0.00884857	0.00418048	0.570601	0.0175643
710559	RP11-148O21.2	8	11412169	11420464	422.767	511	1	0	0	1	0	0	0	#N/A	#N/A	#N/A	#N/A	#N/A	#N/A
710559	RP11-148O21.4	8	11412169	11420464	422.767	511	1	0	0	1	0	0	0	#N/A	#N/A	#N/A	#N/A	#N/A	#N/A
172858	RNU6-101P	12	102154001	102160886	422.747	512	1	0	0	1	0	0	0	ENSG00000222255	0.0033443	2.89246e-05	2.17549e-05	2.71717e-05	8.53186e-05
36299	ILF2	1	153636395	153649058	422.494	513	0	0	1	1	0	0	0	ENSG00000143621	71.151	51.0436	54.8967	40.236	2.45363
183282	RNU6-70P	13	27917078	27933250	421.894	514	0	0	1	1	1	0	0	ENSG00000252247	2.38243e-05	3.6759e-05	3.28732e-05	4.0882e-05	0.0001231
410200	NXT1	20	23325253	23337723	421.613	515	0	0	0	1	0	0	1	ENSG00000132661	7.19426	5.20315	6.8924	9.2196	3.98424
410200	AL096677.1	20	23325253	23337723	421.613	515	0	0	0	1	0	0	1	#N/A	#N/A	#N/A	#N/A	#N/A	#N/A
410200	RP3-322G13.7	20	23325253	23337723	421.613	515	0	0	0	1	0	0	1	#N/A	#N/A	#N/A	#N/A	#N/A	#N/A
683200	TMEM60	7	77426595	77434807	420.393	516	0	1	1	1	1	1	1	ENSG00000135211	9.07782	10.216	9.76056	2.37804	6.33916
683200	PHTF2	7	77426595	77434807	420.393	516	0	1	1	1	1	1	1	ENSG00000006576	8.90252	9.28992	13.7817	7.45398	6.67558
44710	RGSL1	1	182418534	182422766	420.167	517	1	0	0	1	0	0	0	ENSG00000121446	0.0320393	0.0467924	0.0457978	0.0318015	0.400671
268253	CYLD	16	50775527	50778317	420.151	518	0	0	0	1	1	1	1	ENSG00000083799	11.8779	24.0458	15.2552	159.466	185.068
268253	RP11-327F22.1	16	50775527	50778317	420.151	518	0	0	0	1	1	1	1	#N/A	#N/A	#N/A	#N/A	#N/A	#N/A
268253	hsa-mir-3181	16	50775527	50778317	420.151	518	0	0	0	1	1	1	1	#N/A	#N/A	#N/A	#N/A	#N/A	#N/A
329390	ZNF225	19	44616755	44621565	419.902	519	0	0	1	1	0	0	0	ENSG00000256294	1.72895	1.55945	1.99838	1.47728	0.74379
329390	AC084219.4	19	44616755	44621565	419.902	519	0	0	1	1	0	0	0	#N/A	#N/A	#N/A	#N/A	#N/A	#N/A
725848	MIR124-2	8	65290964	65292029	419.794	520	1	0	0	1	0	0	0	ENSG00000207816	1.79547e-05	2.68991e-05	1.98467e-05	2.86679e-05	0.000104952
337931	RHOB	2	20646104	20649778	419.724	521	0	0	1	1	1	0	1	ENSG00000143878	8.95108	6.98418	5.69687	1.01155	101.96
429664	CECR3	22	17728514	17749906	419.358	522	1	0	0	1	0	0	0	ENSG00000241832	0.00440826	5.65294e-05	1.99762e-07	0.000624254	9.09747e-07
149746	TM7SF3	12	27166326	27171341	418.541	523	0	0	1	1	1	0	1	ENSG00000064115	18.9763	33.1172	38.3895	9.44367	10.6702
23963	LRRC8C	1	90096958	90103624	418.226	524	0	0	1	1	1	1	0	ENSG00000171488	6.53648	3.37295	2.60726	12.5788	0.794613
23963	RP5-1007M22.2	1	90096958	90103624	418.226	524	0	0	1	1	1	1	0	#N/A	#N/A	#N/A	#N/A	#N/A	#N/A
23963	RP11-302M6.4	1	90096958	90103624	418.226	524	0	0	1	1	1	1	0	ENSG00000271949	#N/A	#N/A	#N/A	#N/A	#N/A
334833	RRM2	2	10261498	10264814	417.937	525	0	1	1	1	1	1	1	ENSG00000171848	110.301	1.59613	44.611	0.14109	0.936232
408661	SNORD17	20	17940563	17945640	417.233	526	0	0	1	1	1	1	0	ENSG00000212232	2075.68	2296.32	1067.12	3709.76	10210.5
408661	SNX5	20	17940563	17945640	417.233	526	0	0	1	1	1	1	0	ENSG00000089006	58.7757	64.3763	50.5761	21.2522	4.57019
575124	PPWD1	5	64857911	64859840	416.045	527	0	0	1	1	0	1	0	ENSG00000113593	15.8551	12.8914	14.834	56.8292	30.3124
575124	CENPK	5	64857911	64859840	416.045	527	0	0	1	1	0	1	0	ENSG00000123219	26.8426	1.84985	16.181	31.6581	4.68767
643364	GTF3C6	6	111278251	111286854	414.775	528	0	0	1	1	1	0	0	ENSG00000155115	20.9714	40.5533	25.9452	10.8947	1.84019
643364	snoU13	6	111278251	111286854	414.775	528	0	1	1	1	1	0	0	#N/A	#N/A	#N/A	#N/A	#N/A	#N/A
610927	FOXC1	6	1607572	1615871	414.193	529	0	0	1	1	1	1	0	ENSG00000054598	3.20284e-05	0.00266166	0.0723596	3.10821e-05	0.088421
424570	CCT8	21	30444293	30454729	414.047	530	0	0	1	1	0	1	1	ENSG00000156261	76.3359	69.6116	68.5594	46.8951	5.98845
424570	MAP3K7CL	21	30444293	30454729	414.047	530	0	0	1	1	0	1	1	ENSG00000156265	0.629774	1.85906	0.44892	2.79865	0.730161
90985	CYP26A1	10	94831385	94838376	413.523	531	0	0	1	1	1	0	0	ENSG00000095596	0.00160849	0.000262214	0.000600163	0.000878499	0.0254399
36300	NPR1	1	153649059	153654305	413.045	532	0	0	0	1	1	0	0	ENSG00000169418	0.00781152	0.0920323	0.00021959	0.000193375	0.000116352
255314	MESP1	15	90287776	90295039	412.808	533	0	0	0	1	1	0	0	ENSG00000166823	0.293297	0.070366	0.408173	0.00233993	0.000371183
781545	CNTRL	9	123834159	123838205	412.672	534	0	1	1	1	1	1	1	ENSG00000119397	8.62499	7.52566	11.2468	38.9842	15.2632
455593	C3orf49	3	63804234	63805426	411.902	535	0	0	0	1	1	0	0	ENSG00000163632	7.29318e-05	9.25638e-05	7.20709e-05	9.20943e-05	0.000327963
35704	CGN	1	151478606	151483209	410.825	536	0	0	1	1	0	0	0	ENSG00000143375	0.0996161	0.0158489	0.0472862	0.10591	0.0444875
144459	CLEC9A	12	10180825	10185302	410.825	537	0	0	0	1	1	0	1	ENSG00000197992	0.00192235	0.0128955	0.00179758	0.00995276	6.74602
144459	RP11-133L14.5	12	10180825	10185302	410.825	537	0	0	0	1	1	0	1	#N/A	#N/A	#N/A	#N/A	#N/A	#N/A
210797	RNASE6	14	21249124	21250573	410.671	538	1	0	0	1	0	0	0	ENSG00000169413	7.28978	50.4887	0.491306	0.328228	18.6401
396582	IGFBP5	2	217552337	217560726	409.862	539	0	0	1	1	1	1	0	ENSG00000115461	0.746965	0.000516305	4.13945	0.00114607	0.0015682
396582	AC007563.5	2	217552337	217560726	409.862	539	0	0	1	1	1	1	0	#N/A	#N/A	#N/A	#N/A	#N/A	#N/A
353835	BOLA3	2	74366447	74377888	409.422	540	0	0	1	1	1	1	0	ENSG00000163170	24.7976	12.6709	8.51188	7.0439	0.125516
353835	BOLA3-AS1	2	74366447	74377888	409.422	540	0	0	1	1	1	1	0	ENSG00000225439	1.75219	0.0998385	0.759723	0.307454	0.0114153
393473		2	208174591	208175887	409.417	541	0	1	0	1	0	0	0	#N/A	#N/A	#N/A	#N/A	#N/A	#N/A
263323	GPRC5B	16	19894206	19899742	409.274	542	0	0	0	1	1	1	0	ENSG00000167191	0.0395112	0.0439236	0.0152856	0.650519	0.0530752
718429	LETM2	8	38242580	38252729	408.898	543	0	1	1	1	1	1	1	ENSG00000165046	0.546388	0.593461	0.711593	0.433718	8.91758
314937	RNF152	18	59554986	59563229	408.525	544	1	0	0	1	0	0	0	ENSG00000176641	0.0893677	0.0151016	0.268941	0.0207142	0.0867651
383589	HOXD13	2	176955985	176958775	408.033	545	0	0	1	1	1	0	0	ENSG00000128714	1.69188e-07	1.70298e-07	1.79809e-07	8.34024e-07	9.59045e-07
226223	SIPA1L1	14	71772895	71794521	407.803	546	0	0	0	1	0	0	1	ENSG00000197555	9.59463	9.09045	3.18574	14.0908	252.7
226223	RP1-261D10.2	14	71772895	71794521	407.803	546	0	0	0	1	0	0	1	#N/A	#N/A	#N/A	#N/A	#N/A	#N/A
594658	MARCH3	5	126361828	126369387	407.534	547	0	0	1	1	1	0	1	ENSG00000173926	67.3504	1.58642	9.21869	3.21602	1.74728
149444	SSPN	12	26273795	26276614	407.154	548	0	0	0	1	1	0	0	ENSG00000123096	0.0103047	0.275443	0.0404529	0.015857	1.56794
598611	PCDHA3	5	140178618	140185893	405.293	549	0	0	1	1	0	0	0	ENSG00000255408	0.00301951	4.19167e-05	0.000108717	2.36376e-05	8.19959e-05
619766	LY6G6F	6	31672196	31677679	404.225	550	0	1	1	1	1	1	1	ENSG00000204424	3.36627	0.00112223	89.3946	0.000762746	0.00252114
619766	MEGT1	6	31672196	31677679	404.225	550	0	1	1	1	1	1	1	#N/A	#N/A	#N/A	#N/A	#N/A	#N/A
274940	GLG1	16	74639978	74653105	402.893	551	0	0	1	1	1	0	0	ENSG00000090863	17.6504	29.6516	29.947	57.1104	39.9827
274940	HSPE1P7	16	74639978	74653105	402.893	551	0	0	1	1	1	0	0	ENSG00000270945	#N/A	#N/A	#N/A	#N/A	#N/A
227338	RP11-293M10.2	14	75725079	75733861	402.669	552	0	0	0	1	0	0	1	#N/A	#N/A	#N/A	#N/A	#N/A	#N/A
173656	CHST11	12	104842999	104849370	401.73	553	0	0	0	1	0	1	1	ENSG00000171310	12.8293	30.9965	7.84474	6.54628	123.595
145343	HEBP1	12	13152284	13154056	401.691	554	0	0	1	1	1	0	0	ENSG00000013583	35.4195	8.21694	2.52765	1.42384	2.54335
145343	HTR7P1	12	13152284	13154056	401.691	554	0	0	1	1	1	0	0	ENSG00000183935	1.55673	2.04588	0.162847	0.588592	1.09189
145343	RP11-377D9.3	12	13152284	13154056	401.691	554	0	0	1	1	1	0	0	#N/A	#N/A	#N/A	#N/A	#N/A	#N/A
157170	KRT84	12	52772817	52782324	401.404	555	0	0	1	1	0	0	0	ENSG00000161849	1.96107e-07	2.3392e-07	1.98071e-07	2.22796e-07	7.75889e-07
157170	RP3-416H24.4	12	52772817	52782324	401.404	555	0	0	1	1	0	0	0	#N/A	#N/A	#N/A	#N/A	#N/A	#N/A
464199	NSUN3	3	93780765	93783302	400.112	556	0	0	1	1	1	1	0	ENSG00000178694	14.3455	5.80095	5.31307	8.09764	17.66
464199	DHFRL1	3	93780765	93783302	400.112	556	0	0	1	1	1	1	0	ENSG00000178700	1.57502	2.01673	1.12892	1.44681	1.19116
533354	RNU6-948P	4	122113699	122114162	399.982	557	0	0	0	1	1	1	0	ENSG00000252183	1.79242e-05	2.7142e-05	1.63883e-05	3.15664e-05	9.7462e-05
699466	RNU6-1010P	7	130738678	130741382	399.733	558	0	0	0	1	1	1	1	ENSG00000199627	2.05478e-05	5.25037e-05	2.38952e-05	9.8941e-05	0.000120977
432936	LL22NC01-116C6.1	22	33178967	33185615	399.412	559	0	0	1	1	1	0	0	#N/A	#N/A	#N/A	#N/A	#N/A	#N/A
760862	ACO1	9	32382623	32396972	398.865	560	0	0	1	1	1	0	1	ENSG00000122729	7.14461	23.0138	7.93413	2.22553	0.503064
745034	SQLE	8	126007452	126015447	398.646	561	0	0	1	1	1	0	0	ENSG00000104549	43.9984	10.4088	130.072	1.69684	0.320459
745034	RP11-6D1.3	8	126007452	126015447	398.646	561	0	0	1	1	1	0	0	#N/A	#N/A	#N/A	#N/A	#N/A	#N/A
223296	SNORD112	14	61727941	61731018	398.599	562	0	0	1	1	0	0	0	#N/A	#N/A	#N/A	#N/A	#N/A	#N/A
608025	FGF18	5	170845216	170847873	398.015	563	0	0	1	1	1	0	0	ENSG00000156427	0.0106373	3.63992e-05	6.60062e-06	0.0236226	3.76187e-06
404738	GPCPD1	20	5585992	5601172	397.376	564	0	0	1	1	0	1	0	ENSG00000125772	49.0259	33.7949	13.296	27.6217	272.544
469881	PLCXD2	3	111393034	111394842	397.314	565	0	1	1	1	1	1	1	ENSG00000240891	0.644756	0.171659	0.0813219	5.13561	0.800121
17777	ZRANB2	1	71530008	71535732	397.156	566	0	0	1	1	1	1	0	ENSG00000132485	24.6513	16.0639	31.4093	51.8654	19.817
17777	MIR186	1	71530008	71535732	397.156	566	0	0	1	1	1	1	0	ENSG00000207721	2.668e-05	4.6179e-05	3.2403e-05	4.87406e-05	0.000139002
424595	U3	21	30549307	30557482	397.002	567	0	1	0	1	0	0	1	#N/A	#N/A	#N/A	#N/A	#N/A	#N/A
348527	CCDC85A	2	56410512	56417165	396.836	568	1	0	0	1	0	0	0	ENSG00000055813	0.000428328	0.00358754	0.0417555	0.000146078	0.000104515
348527	AC007743.1	2	56410512	56417165	396.836	568	1	0	0	1	0	0	0	#N/A	#N/A	#N/A	#N/A	#N/A	#N/A
584651	AC008592.5	5	95191249	95198706	396.755	569	0	0	1	1	1	1	0	#N/A	#N/A	#N/A	#N/A	#N/A	#N/A
177196	SUDS3	12	118813520	118817622	396.153	570	0	1	1	1	1	1	1	ENSG00000111707	10.9816	8.48743	10.0177	8.68574	45.4234
177196	RP11-131L12.2	12	118813520	118817622	396.153	570	0	1	1	1	1	1	1	#N/A	#N/A	#N/A	#N/A	#N/A	#N/A
383592	HOXD12	2	176961158	176967522	395.518	571	0	0	1	1	1	0	0	ENSG00000170178	5.55814e-05	7.04346e-05	6.43614e-05	6.9013e-05	0.000276398
65891	TUBAL3	10	5443225	5447414	395.108	572	0	0	1	1	1	0	0	ENSG00000178462	0.284919	5.13305e-05	3.5311	0.000649361	0.000156556
181262	GJB2	13	20766535	20771722	394.256	573	1	0	0	1	0	0	0	ENSG00000165474	0.000339908	2.56418	0.000243008	0.000139034	0.00912467
618285	HIST1H2AB	6	26032305	26034591	394.249	574	0	1	1	1	1	1	1	ENSG00000137259	239.964	3.68182	79.9811	3.44912	1.99238
158489	TSFM	12	58173701	58180125	393.948	575	0	0	0	1	0	1	0	ENSG00000123297	15.469	14.4656	8.13278	6.82892	1.93956
572099	CTC-236F12.4	5	55775787	55782118	393.917	576	0	0	1	1	1	0	1	#N/A	#N/A	#N/A	#N/A	#N/A	#N/A
262394	FOPNL	16	15980084	15987977	393.147	577	0	0	1	1	1	0	0	ENSG00000133393	34.4348	13.7603	28.4789	9.56333	4.23363
363819	AC079753.1	2	113594484	113606655	392.437	578	0	0	0	1	1	0	0	#N/A	#N/A	#N/A	#N/A	#N/A	#N/A
667588	ABCB5	7	20639530	20655362	392.023	579	0	0	0	1	1	0	0	ENSG00000004846	0.299464	0.0228112	0.0511041	0.00304391	0.0147347
93841	SH3PXD2A	10	105614422	105616436	391.767	580	0	0	1	1	1	0	0	ENSG00000107957	1.41615	1.61851	7.99636	1.4731	0.195025
289019	HOXB-AS4	17	46701021	46706541	391.592	581	0	0	1	1	1	0	0	ENSG00000242207	0.000315726	0.000395808	0.00036407	0.000422279	0.00147079
289019	HOXB9	17	46701021	46706541	391.592	581	0	0	1	1	1	0	0	ENSG00000170689	0.287044	4.89412e-05	0.000173009	5.45952e-05	0.000170189
64643	LARP4B	10	975827	979074	391.44	582	0	0	1	1	0	0	1	ENSG00000107929	12.2715	17.883	13.4508	10.2277	41.8224
64643	RP11-363N22.2	10	975827	979074	391.44	582	0	0	1	1	0	0	1	#N/A	#N/A	#N/A	#N/A	#N/A	#N/A
169843	BTG1	12	92528801	92540680	391.41	583	0	0	0	1	0	1	0	ENSG00000133639	20.2554	32.7	5.66481	223.039	257.851
169843	C12orf79	12	92528801	92540680	391.41	583	0	0	0	1	0	1	0	ENSG00000257242	0.209504	0.493149	0.179687	25.948	26.1817
169843	RP11-796E2.4	12	92528801	92540680	391.41	583	0	0	0	1	0	1	0	#N/A	#N/A	#N/A	#N/A	#N/A	#N/A
495044	MB21D2	3	192633518	192637409	391.303	584	1	0	0	1	0	0	0	ENSG00000180611	0.198493	0.526789	0.152853	3.10192	5.15913e-07
146222	STRAP	12	16009121	16041462	391.008	585	0	0	0	1	1	0	0	ENSG00000023734	29.3605	29.0434	36.1561	18.7565	16.1818
146222	EPS8	12	16009121	16041462	391.008	585	0	0	0	1	1	0	0	ENSG00000151491	1.21849	8.07889	3.22233	0.793038	0.130166
227315	TMED10	14	75641243	75643481	390.305	586	0	0	0	1	0	0	1	ENSG00000170348	45.6441	144.102	61.6048	39.6438	37.5344
30764	C1orf162	1	112014292	112018606	390.304	587	0	1	1	1	1	1	1	ENSG00000143110	2.68697	62.0576	0.709392	20.9775	15.6982
52141	CD55	1	207491500	207495827	390.222	588	0	1	1	1	1	1	1	ENSG00000196352	22.8246	24.8022	58.8389	55.3177	469.763
253525	C15orf40	15	83679256	83681883	390.026	589	0	1	1	1	1	1	1	ENSG00000169609	5.96223	7.91476	5.08753	7.89042	4.94944
253525	RP11-382A20.7	15	83679256	83681883	390.026	589	0	1	1	1	1	1	1	#N/A	#N/A	#N/A	#N/A	#N/A	#N/A
211697	NOP9	14	24765344	24769127	389.337	590	0	0	1	1	0	1	1	ENSG00000196943	5.29016	7.31437	3.66937	4.49746	1.15095
211697	DHRS1	14	24765344	24769127	389.337	590	0	0	1	1	0	1	1	ENSG00000157379	2.55728	5.5469	2.87401	5.83222	10.1954
177194	TAOK3	12	118799031	118811404	388.916	591	0	0	1	1	1	0	1	ENSG00000135090	25.0924	45.4683	59.1198	27.9166	102.86
401327	SCARNA5	2	234179443	234186298	388.113	592	0	0	1	1	0	0	0	ENSG00000252010	514.746	484.835	224.08	6153.61	3300.04
401327	ATG16L1	2	234179443	234186298	388.113	592	0	0	1	1	0	0	0	ENSG00000085978	7.83209	7.23971	7.44833	21.3403	18.7878
618794	HIST1H2AJ	6	27782229	27786337	388.006	593	0	0	1	1	1	0	0	ENSG00000182611	901.075	2.21801	384.387	1.76456	2.03226
618794	HIST1H2BM	6	27782229	27786337	388.006	593	0	0	1	1	1	0	0	ENSG00000196374	357.537	1.44223	160.581	2.48862	0.930017
219747	ARF6	14	50358189	50364517	387.846	594	0	0	1	1	0	1	0	ENSG00000165527	32.5741	33.4277	18.1724	28.6643	55.9902
129075	SLC36A4	11	92929974	92931774	387.751	595	1	0	0	1	0	0	0	ENSG00000180773	5.45056	14.0417	6.17225	8.11108	9.05768
242729	RNU7-5P	15	45738325	45742407	387.687	596	1	0	0	1	0	0	0	ENSG00000252285	5.90967e-05	7.54384e-05	5.59811e-05	6.69512e-05	0.000268173
242729	RP11-519G16.3	15	45738325	45742407	387.687	596	1	0	0	1	0	0	0	#N/A	#N/A	#N/A	#N/A	#N/A	#N/A
238634	TRPM1	15	31449530	31459925	387.569	597	0	0	1	1	0	0	1	ENSG00000134160	0.0123649	0.0350279	0.0298204	0.00842792	0.0475878
352440	AC097495.2	2	69050828	69060264	387.397	598	0	0	0	1	1	1	0	#N/A	#N/A	#N/A	#N/A	#N/A	#N/A
766012	RP11-203L2.4	9	71458015	71459083	387.161	599	0	0	1	1	1	0	1	#N/A	#N/A	#N/A	#N/A	#N/A	#N/A
13994	MYSM1	1	59164479	59168269	387.041	600	0	1	1	1	1	1	1	ENSG00000162601	11.6578	9.64292	9.53879	17.1915	30.6111
96001	snoU13	10	112331271	112337328	386.927	601	0	1	1	1	1	0	1	#N/A	#N/A	#N/A	#N/A	#N/A	#N/A
676389		7	50411807	50412756	386.416	602	0	1	1	1	1	1	1	#N/A	#N/A	#N/A	#N/A	#N/A	#N/A
158418	INHBE	12	57841970	57847045	386.25	603	0	0	1	1	1	0	1	ENSG00000139269	0.0272184	0.00889375	0.0380306	0.00212146	0.00453555
236462	NIPA2	15	23032134	23036590	385.753	604	0	0	1	1	0	0	1	ENSG00000140157	17.8405	32.1322	14.743	7.98173	34.2533
580667	VCAN-AS1	5	82874840	82878202	385.398	605	0	0	1	1	1	0	0	ENSG00000249835	0.00270674	0.00303882	0.00021348	0.000269609	0.00085165
609823	COL23A1	5	178014106	178018757	385.379	606	0	0	1	1	1	0	0	ENSG00000050767	0.675612	0.169206	0.0333365	0.00340742	0.105068
47946	RGS1	1	192543821	192547525	385.224	607	1	0	0	1	0	0	0	ENSG00000090104	3.08547	7.59789	2.58704	25.9377	0.385312
62243	KMO	1	241691478	241699238	384.715	608	1	0	0	1	0	0	0	ENSG00000117009	0.615575	18.0977	0.106058	0.0230793	0.0871373
746873	ADCY8	8	132053643	132056079	384.415	609	1	0	0	1	0	0	0	ENSG00000155897	0.000179453	0.00118079	0.000175985	0.000206604	0.000721176
10285	TESK2	1	45955111	45957467	384.408	610	0	0	1	1	1	1	0	ENSG00000070759	4.44929	2.86016	4.47621	1.99397	19.0618
210632	OR4N5	14	20607982	20612778	384.081	611	0	0	1	1	0	0	0	ENSG00000184394	4.83867e-07	9.765e-07	1.11e-05	5.72591e-07	2.19475e-06
38691	RP11-267N12.1	1	163130423	163144934	384.062	612	1	0	0	1	0	0	0	#N/A	#N/A	#N/A	#N/A	#N/A	#N/A
602744	SAP30L	5	153820579	153829059	383.943	613	0	0	0	1	0	1	1	ENSG00000164576	9.43512	12.5089	8.61714	16.4368	49.0614
602744	SAP30L-AS1	5	153820579	153829059	383.943	613	0	0	0	1	0	1	1	ENSG00000245275	0.646882	0.42043	0.703063	0.700316	4.29044
52053	PFKFB2	1	207221568	207223320	383.082	614	0	1	1	1	1	1	1	ENSG00000123836	5.31817	3.53459	5.90825	1.22282	18.7085
387137	ZSWIM2	2	187710879	187718899	382.923	615	1	0	0	1	0	0	0	ENSG00000163012	6.07632e-05	0.000717448	0.00032478	8.45184e-05	0.000331212
130059	CCDC82	11	96122634	96123856	382.772	616	0	0	1	1	1	1	0	ENSG00000149231	12.6513	9.99017	21.4674	22.7695	28.5179
130059	JRKL	11	96122634	96123856	382.772	616	0	0	1	1	1	1	0	ENSG00000183340	1.88589	2.36549	3.30414	2.68227	1.23027
327631	FFAR1	19	35842125	35844059	382.481	617	0	0	1	1	0	0	0	ENSG00000126266	4.69942e-07	0.000271464	5.52098e-07	6.09352e-07	0.000170732
292530	TBX2	17	59469602	59481577	382.219	618	0	0	1	1	1	0	0	ENSG00000121068	0.00784655	0.0014582	0.00639928	0.00276625	0.0100213
292530	RP11-332H18.4	17	59469602	59481577	382.219	618	0	0	1	1	1	0	0	#N/A	#N/A	#N/A	#N/A	#N/A	#N/A
292530	RP11-332H18.5	17	59469602	59481577	382.219	618	0	0	1	1	1	0	0	#N/A	#N/A	#N/A	#N/A	#N/A	#N/A
295759	SSTR2	17	71151781	71167083	381.574	619	0	0	1	1	1	0	0	ENSG00000180616	0.00368824	0.263566	0.00120147	0.000562713	0.00352007
295759	POLR3KP2	17	71151781	71167083	381.574	619	0	0	1	1	1	0	0	ENSG00000265469	1.61253e-06	2.61578e-06	7.66792e-05	2.57771e-06	9.58456e-06
295759	RP11-143K11.5	17	71151781	71167083	381.574	619	0	0	1	1	1	0	0	#N/A	#N/A	#N/A	#N/A	#N/A	#N/A
210798	RP11-219E7.1	14	21250574	21252996	381.259	620	1	0	0	1	0	0	0	#N/A	#N/A	#N/A	#N/A	#N/A	#N/A
709761	MFHAS1	8	8747455	8751522	381.066	621	0	0	1	1	0	0	0	ENSG00000147324	25.1101	12.5313	0.97578	7.27136	0.0647199
458487	RNU2-64P	3	73147843	73161556	381.001	622	1	0	0	1	0	0	0	ENSG00000223247	3.01735	4.0247	2.79818	1.07227	21.5165
119415	SSRP1	11	57103304	57107461	380.676	623	0	1	1	1	1	1	1	ENSG00000149136	48.5828	15.3734	21.8642	17.5224	0.181965
119415	P2RX3	11	57103304	57107461	380.676	623	0	1	1	1	1	1	1	ENSG00000109991	0.00192037	0.000884515	0.000579267	0.000674956	0.00378156
779653	TNFSF8	9	117691693	117694379	379.856	624	0	0	0	1	0	1	1	ENSG00000106952	0.645911	9.67348	0.00198006	26.4537	8.58148
112751	APIP	11	34937402	34946813	379.272	625	0	0	1	1	1	1	0	ENSG00000149089	9.72679	18.2201	9.596	5.90409	2.37024
112751	PDHX	11	34937402	34946813	379.272	625	0	0	1	1	1	1	0	ENSG00000110435	8.77309	14.624	8.90874	12.4778	6.04068
32424	RP11-27K13.3	1	117600462	117602628	378.973	626	0	0	1	1	1	1	0	#N/A	#N/A	#N/A	#N/A	#N/A	#N/A
52865	HSD11B1	1	209856272	209862015	378.939	627	0	0	0	1	0	0	1	ENSG00000117594	0.0119808	6.1219	0.00905058	0.0201079	0.00573776
645014	DSE	6	116573907	116583127	378.769	628	0	0	0	1	0	0	1	ENSG00000111817	4.79771	22.8892	3.90134	1.06993	16.0218
645014	TSPYL4	6	116573907	116583127	378.769	628	0	0	0	1	0	0	1	ENSG00000187189	2.51128	1.31057	3.88114	5.67417	3.06702
645014	RP3-486I3.4	6	116573907	116583127	378.769	628	0	0	0	1	0	0	1	#N/A	#N/A	#N/A	#N/A	#N/A	#N/A
645014	RP3-486I3.7	6	116573907	116583127	378.769	628	0	0	0	1	0	0	1	#N/A	#N/A	#N/A	#N/A	#N/A	#N/A
288180	FMNL1	17	43296482	43306626	378.668	629	0	0	0	1	1	1	1	ENSG00000184922	4.60648	9.06529	3.46028	24.8791	623.903
288180	CTD-2020K17.1	17	43296482	43306626	378.668	629	0	0	0	1	1	1	1	#N/A	#N/A	#N/A	#N/A	#N/A	#N/A
119440	SLC43A3	11	57188288	57197725	378.058	630	0	0	1	1	1	0	1	ENSG00000134802	89.1418	42.2597	67.0738	1.56179	3.13449
119440	RP11-872D17.8	11	57188288	57197725	378.058	630	0	0	1	1	1	0	1	ENSG00000254979	17.9948	0.554955	2.84209	0.0177883	0.00509742
319435	ZNF516	18	74205983	74213153	377.479	631	1	0	0	1	0	0	0	ENSG00000101493	3.73159	7.33317	1.61052	3.83007	100.94
319435	RP11-17M16.1	18	74205983	74213153	377.479	631	1	0	0	1	0	0	0	#N/A	#N/A	#N/A	#N/A	#N/A	#N/A
594589	LMNB1	5	126110688	126115047	377.209	632	0	0	1	1	0	1	0	ENSG00000113368	50.6908	7.85648	37.1043	6.51462	411.614
594589	RP11-434D11.4	5	126110688	126115047	377.209	632	0	0	1	1	0	1	0	#N/A	#N/A	#N/A	#N/A	#N/A	#N/A
559609	ANKH	5	14871218	14873280	376.98	633	0	0	0	1	0	1	0	ENSG00000154122	33.5139	4.44577	0.563798	13.8779	0.0652873
559609	CTB-40H15.4	5	14871218	14873280	376.98	633	0	0	0	1	0	1	0	#N/A	#N/A	#N/A	#N/A	#N/A	#N/A
709705	CLDN23	8	8549756	8562619	376.601	634	1	0	0	1	0	0	0	ENSG00000253958	0.000380589	2.8753	0.00012013	2.51235e-06	7.48849e-07
709705	AC087269.1	8	8549756	8562619	376.601	634	1	0	0	1	0	0	0	#N/A	#N/A	#N/A	#N/A	#N/A	#N/A
52855	LAMB3	1	209823579	209826397	376.271	635	0	0	0	1	0	0	1	ENSG00000196878	0.437791	1.12004	0.41247	0.0161589	1.62519
99713	HMX3	10	124889679	124898602	376.235	636	1	0	0	1	0	0	0	ENSG00000188620	9.1383e-08	1.79464e-06	1.04323e-07	5.73806e-06	0.000213113
225502	CTD-2325P2.3	14	69150271	69153403	375.129	637	1	0	0	1	0	0	0	#N/A	#N/A	#N/A	#N/A	#N/A	#N/A
737341	YWHAZ	8	101965454	101968973	374.582	638	0	0	1	1	1	0	0	ENSG00000164924	102.514	262.51	260.617	141.05	450.896
720712	RNU6-295P	8	49219508	49223392	374.03	639	1	0	0	1	0	0	0	ENSG00000252710	2.35778e-05	2.83872e-05	1.74785e-05	2.97401e-05	0.000110031
358007	THNSL2	2	88464032	88472383	373.956	640	0	0	1	1	0	1	1	ENSG00000144115	0.210815	0.322452	0.0286022	0.342638	0.504251
173831	KIAA1033	12	105499207	105507189	373.864	641	0	0	0	1	0	0	1	ENSG00000136051	16.3631	51.0224	15.8984	25.6368	152.574
173831	RP11-61E11.2	12	105499207	105507189	373.864	641	0	0	0	1	0	0	1	#N/A	#N/A	#N/A	#N/A	#N/A	#N/A
493342	BCL6	3	187460429	187464148	373.782	642	0	0	1	1	1	1	0	ENSG00000113916	12.657	35.1029	0.234941	2.38921	724.626
493342	RP11-211G3.2	3	187460429	187464148	373.782	642	0	0	1	1	1	1	0	#N/A	#N/A	#N/A	#N/A	#N/A	#N/A
278766	AC108004.3	17	262444	263865	373.702	643	0	1	1	1	1	0	1	#N/A	#N/A	#N/A	#N/A	#N/A	#N/A
590889	CCDC112	5	114629207	114637935	373.154	644	0	0	1	1	0	0	0	ENSG00000164221	4.82183	3.69518	1.39413	2.06055	3.68601
35779	C2CD4D	1	151812040	151814543	373.1	645	1	0	0	1	0	0	0	ENSG00000225556	2.67711e-07	3.2934e-07	2.10958e-07	0.000945302	9.63122e-07
35779	AL450992.2	1	151812040	151814543	373.1	645	1	0	0	1	0	0	0	#N/A	#N/A	#N/A	#N/A	#N/A	#N/A
35779	Y_RNA	1	151812040	151814543	373.1	645	0	0	0	1	0	0	0	#N/A	#N/A	#N/A	#N/A	#N/A	#N/A
661731	PSMB1	6	170856862	170864582	372.97	646	0	1	1	1	1	1	1	ENSG00000008018	93.5858	94.7884	89.2151	43.2199	68.5495
661731	TBP	6	170856862	170864582	372.97	646	0	1	1	1	1	1	1	ENSG00000112592	4.9873	4.06308	4.29651	5.03125	6.54413
22233	CTBS	1	85038838	85042009	372.682	647	0	0	1	1	1	0	1	ENSG00000117151	2.98878	14.1815	6.24689	6.94493	143.724
263658	TMEM159	16	21166049	21171878	372.59	648	0	0	1	1	1	0	0	ENSG00000011638	1.95651	9.08541	5.81889	4.62568	1.69036
263658	DNAH3	16	21166049	21171878	372.59	648	0	0	1	1	1	0	0	ENSG00000158486	0.00320003	0.00585339	0.00934853	0.00215137	0.00799382
5840	PIGV	1	27112453	27115733	371.048	649	0	1	1	1	1	1	1	ENSG00000060642	3.84569	3.67083	2.28411	2.16119	8.77135
654728	RAB32	6	146859887	146865830	370.728	650	0	0	0	1	1	0	0	ENSG00000118508	12.12	38.6286	77.9016	0.0198905	32.2278
416623	RNU7-14P	20	52277885	52285921	370.224	651	0	0	1	1	1	0	1	ENSG00000238468	5.64257e-05	7.2237e-05	7.84e-05	7.79845e-05	0.000233088
120010	OR5A2	11	59185789	59198048	370.202	652	1	0	0	1	0	0	0	ENSG00000172324	3.80357e-07	4.78035e-07	4.17768e-07	5.241e-07	1.93062e-06
82437	REEP3	10	65278667	65282382	370.086	653	0	0	1	1	1	0	0	ENSG00000165476	6.18328	15.0016	4.56051	2.32414	4.45675
450613	TMEM158	3	45263958	45268875	369.863	654	0	0	0	1	1	0	0	ENSG00000249992	0.336897	0.220353	0.489373	1.39546e-06	0.0291934
450613	AC010170.1	3	45263958	45268875	369.863	654	0	0	0	1	1	0	0	#N/A	#N/A	#N/A	#N/A	#N/A	#N/A
157379	AAAS	12	53718188	53721565	369.207	655	0	0	1	1	1	0	0	ENSG00000094914	17.9155	11.6495	11.3725	11.2314	5.62743
188710	TSC22D1	13	45146990	45153006	368.904	656	1	0	0	1	0	0	0	ENSG00000102804	31.8196	47.9755	34.2044	7.38153	0.664522
241000	C15orf53	15	38982823	38991512	368.477	657	0	0	0	1	0	1	0	ENSG00000175779	0.0365938	8.61214e-07	2.88293	0.00328797	4.465e-06
54315	CENPF	1	214775801	214777074	368.209	658	0	0	1	1	1	0	0	ENSG00000117724	44.8671	0.590378	35.3877	0.901824	0.0877136
470128	CD200	3	112050928	112054929	368.089	659	0	0	0	1	1	1	0	ENSG00000091972	0.0266315	0.00260713	0.0200827	0.749234	0.055416
618812	HIST1H2AL	6	27829816	27834320	367.848	660	0	0	1	1	1	0	1	ENSG00000198374	440.788	9.47738	162.964	2.12069	4.57612
618812	HIST1H2BPS2	6	27829816	27834320	367.848	660	0	0	1	1	1	0	1	ENSG00000217646	2.82637	0.000852969	0.395761	2.68031e-05	2.91285e-05
40551	ATP1B1	1	169070988	169080524	367.559	661	0	0	0	1	1	0	0	ENSG00000143153	3.89592	28.383	12.6825	0.524404	0.00678255
40551	RP5-1018K9.1	1	169070988	169080524	367.559	661	0	0	0	1	1	0	0	#N/A	#N/A	#N/A	#N/A	#N/A	#N/A
247054	MYO1E	15	59659281	59665177	367.09	662	1	0	0	1	0	0	0	ENSG00000157483	0.988663	36.8358	0.378903	0.10279	0.139259
247054	FAM81A	15	59659281	59665177	367.09	662	1	0	0	1	0	0	0	ENSG00000157470	0.0762822	1.22337	0.163211	0.0505729	0.154176
289320	DLX3	17	48064697	48075187	366.708	663	0	0	0	1	1	0	0	ENSG00000064195	4.92707e-05	0.0047407	0.00245664	0.000350898	0.000210162
289320	RP11-1094H24.3	17	48064697	48075187	366.708	663	0	0	0	1	1	0	0	#N/A	#N/A	#N/A	#N/A	#N/A	#N/A
60190	U8	1	234728394	234732618	366.287	664	0	0	0	1	0	0	0	#N/A	#N/A	#N/A	#N/A	#N/A	#N/A
487972	LRRC31	3	169581881	169591586	365.897	665	1	0	0	1	0	0	0	ENSG00000114248	0.000469242	0.000723158	0.00050895	0.000903537	0.00227347
246876	FAM63B	15	59052950	59065239	365.608	666	0	0	1	1	1	0	0	ENSG00000128923	2.48277	3.45029	13.3431	3.84077	8.59959
246876	RP11-30K9.6	15	59052950	59065239	365.608	666	0	0	1	1	1	0	0	#N/A	#N/A	#N/A	#N/A	#N/A	#N/A
360346	AC016738.3	2	101593126	101596772	365.195	667	0	0	0	1	0	1	0	#N/A	#N/A	#N/A	#N/A	#N/A	#N/A
213914	HECTD1	14	31675473	31680385	365.172	668	0	0	1	1	0	0	0	ENSG00000092148	54.6451	53.7479	51.9899	43.0823	37.7837
698757	MIR129-1	7	127844930	127848504	364.941	669	1	0	0	1	0	0	0	ENSG00000207705	3.57501e-05	6.53293e-05	5.36818e-05	6.21734e-05	0.000168821
714135	STC1	8	23712143	23714333	364.867	670	1	0	0	1	0	0	0	ENSG00000159167	0.00471781	2.94784e-05	0.000137805	0.000200213	0.000210292
34292	PEX11B	1	145513771	145516282	364.186	671	0	0	1	1	1	1	0	ENSG00000131779	4.46844	7.18396	6.29211	6.45084	4.58342
34292	GNRHR2	1	145513771	145516282	364.186	671	0	0	1	1	1	1	0	ENSG00000211451	1.9101	1.84621	2.59499	3.79011	8.54137
412543	TGM2	20	36791487	36795275	363.96	672	1	0	0	1	0	0	0	ENSG00000198959	13.1153	33.2743	0.106028	0.0577897	0.0236054
103033	RNU7-50P	11	3801280	3803196	362.916	673	0	1	1	1	1	1	1	ENSG00000238304	4.08352e-05	7.67867e-05	8.88297e-05	6.58623e-05	0.000267782
689902	AC004893.11	7	98610216	98611812	362.628	674	0	0	1	1	1	0	0	#N/A	#N/A	#N/A	#N/A	#N/A	#N/A
22212	RPF1	1	84941119	84947206	362.54	675	0	0	1	1	1	0	1	ENSG00000117133	16.3909	19.5772	14.8392	27.5013	9.81865
566361	CTD-2353F22.1	5	36724674	36730057	362.406	676	0	0	1	1	1	0	1	#N/A	#N/A	#N/A	#N/A	#N/A	#N/A
715443	PNOC	8	28173912	28176125	362.106	677	0	0	0	1	1	0	0	ENSG00000168081	0.00370017	0.0377104	0.00134541	0.012034	0.00795407
517918	MTHFD2L	4	74972881	74981052	362.06	678	0	0	0	1	0	0	1	ENSG00000163738	6.76058	4.14818	31.7749	5.22773	1.11698
171817	TMPO	12	98907290	98911535	362.012	679	0	0	1	1	0	1	1	ENSG00000120802	113.619	37.5265	66.4682	73.7691	0.793398
171817	TMPO-AS1	12	98907290	98911535	362.012	679	0	0	1	1	0	1	1	ENSG00000257167	2.95805	0.602204	1.31602	0.389022	0.0387286
702917	GSTK1	7	142937324	142941386	361.853	680	0	0	0	1	0	0	1	ENSG00000197448	25.1879	102.977	40.6723	105.601	87.8272
287304	KRT28	17	38954475	38958393	361.842	681	1	0	0	1	0	0	0	ENSG00000173908	2.17578e-07	2.94529e-07	2.34509e-07	2.88948e-07	1.16037e-06
568582	HMGCS1	5	43310396	43314230	361.742	682	0	1	1	1	1	1	1	ENSG00000112972	83.4284	16.0972	124.791	5.96189	18.2199
140331	ADAMTS15	11	130316168	130326205	361.722	683	0	0	1	1	1	0	0	ENSG00000166106	1.29124e-05	0.0258398	5.8088e-08	8.14336e-05	2.44383e-07
132121	MMP8	11	102593319	102598962	361.499	684	1	0	0	1	0	0	0	ENSG00000118113	0.00296978	0.682688	0.00568146	0.00367771	2.2475
103551	OR51A10P	11	5488941	5494631	360.727	685	1	0	0	1	0	0	0	ENSG00000230484	0.0304268	1.77861e-06	0.000716712	0.00261986	4.11933e-05
572228	snoU13	5	56152659	56153353	360.682	686	0	1	1	1	1	1	1	#N/A	#N/A	#N/A	#N/A	#N/A	#N/A
576255	CCNB1	5	68471391	68473549	360.575	687	0	0	1	1	1	0	1	ENSG00000134057	83.912	4.09672	54.8099	0.665035	0.449294
576255	snoU13	5	68471391	68473549	360.575	687	0	1	1	1	1	0	1	#N/A	#N/A	#N/A	#N/A	#N/A	#N/A
283346	AKAP10	17	19879250	19884449	360.128	688	0	0	0	1	1	0	0	ENSG00000108599	12.1244	16.5313	10.8146	21.9045	73.2902
713047	CSGALNACT1	8	19611853	19620516	359.775	689	0	0	0	1	1	1	1	ENSG00000147408	0.418444	1.90628	0.186322	22.7898	49.8315
132059	MMP7	11	102401063	102407653	359.701	690	1	0	0	1	0	0	0	ENSG00000137673	0.000338844	0.844932	0.0152131	0.00113971	0.0017021
250017	TLE3	15	70384703	70393665	359.031	691	0	0	0	1	0	1	1	ENSG00000140332	11.4259	11.172	5.59411	6.78384	394.284
258642	VIMP	15	101816805	101818647	358.95	692	0	0	1	1	1	0	0	ENSG00000131871	12.0025	21.7363	16.2095	5.9205	8.95437
506991	ARAP2	4	36244999	36250603	358.836	693	1	0	0	1	0	0	0	ENSG00000047365	2.41285	26.4439	0.242674	20.0384	26.0303
506991	RP11-431M7.3	4	36244999	36250603	358.836	693	1	0	0	1	0	0	0	#N/A	#N/A	#N/A	#N/A	#N/A	#N/A
742867	EXT1	8	119119522	119124858	358.257	694	0	0	0	1	1	1	0	ENSG00000182197	1.91532	1.0995	1.60547	3.52589	16.9331
530413	C4orf32	4	113063940	113067469	358.231	695	0	0	1	1	0	1	1	ENSG00000174749	4.16276	2.44449	1.22011	3.52643	2.20919
650374	STX7	6	132830961	132835790	357.899	696	1	0	0	1	0	0	0	ENSG00000079950	18.8869	51.4114	20.3042	4.93007	125.396
647445	NKAIN2	6	124121501	124130989	357.683	697	1	0	0	1	0	0	0	ENSG00000188580	0.252935	0.00373464	0.0777119	0.00587409	0.0113036
241416	SRP14	15	40329868	40338300	357.49	698	0	0	1	1	1	1	0	ENSG00000140319	71.7712	111.905	74.267	57.7473	100.924
241416	SRP14-AS1	15	40329868	40338300	357.49	698	0	0	1	1	1	1	0	ENSG00000248508	0.57871	1.30994	1.24274	2.48964	0.212801
119413	snoU13	11	57095578	57097518	357.349	699	0	1	1	1	0	1	1	#N/A	#N/A	#N/A	#N/A	#N/A	#N/A
427255	KCNJ15	21	39528895	39529284	356.536	700	0	0	0	1	1	0	0	ENSG00000157551	0.0408675	0.191056	0.0356003	0.0588749	370.46
298511	EMILIN2	18	2845960	2857529	356.401	701	1	0	0	1	0	0	0	ENSG00000132205	13.7606	58.2189	4.15649	0.717467	16.9903
493630	MIR28	3	188404448	188409738	356.241	702	1	0	0	1	0	0	0	ENSG00000207651	2.56892e-05	4.31878e-05	3.66195e-05	4.77324e-05	0.000147533
676308	C7orf72	7	50133355	50136498	355.875	703	0	0	0	1	1	1	0	ENSG00000164500	1.26376e-07	2.5656e-07	0.000161864	2.48529e-07	9.41479e-07
35754	MRPL9	1	151731826	151740226	355.623	704	1	0	0	1	0	0	0	ENSG00000143436	20.1835	14.8942	15.6074	26.4226	0.348917
35754	OAZ3	1	151731826	151740226	355.623	704	1	0	0	1	0	0	0	ENSG00000143450	0.312054	0.417066	0.229439	0.0383484	0.0451904
35754	RP11-98D18.16	1	151731826	151740226	355.623	704	1	0	0	1	0	0	0	#N/A	#N/A	#N/A	#N/A	#N/A	#N/A
35754	RP11-98D18.2	1	151731826	151740226	355.623	704	1	0	0	1	0	0	0	#N/A	#N/A	#N/A	#N/A	#N/A	#N/A
655641	PPIL4	6	149834768	149840193	355.599	705	0	1	1	1	1	1	1	ENSG00000131013	10.6007	10.5273	9.07161	15.177	16.9074
655641	RNU7-3P	6	149834768	149840193	355.599	705	0	1	1	1	1	1	1	ENSG00000252244	5.30675e-05	8.18525e-05	6.36009e-05	6.28921e-05	0.000321833
285075	MIR193A	17	29885579	29889989	355.483	706	1	0	0	1	0	0	0	ENSG00000207614	2.34848e-05	4.15104e-05	3.36785e-05	3.72365e-05	0.000125507
520435	RASGEF1B	4	82380731	82395613	355.439	707	0	0	1	1	1	1	0	ENSG00000138670	6.44451	51.4452	1.67623	3.24506	0.106983
90738	SNORA25	10	93835564	93836957	355.284	708	0	0	1	1	1	0	0	ENSG00000207112	#N/A	#N/A	#N/A	#N/A	#N/A
263119	COQ7	16	19074021	19085386	354.53	709	0	0	0	1	0	0	1	ENSG00000167186	3.95284	6.09024	3.24416	4.95612	15.9737
263119	RP11-626G11.1	16	19074021	19085386	354.53	709	0	0	0	1	0	0	1	#N/A	#N/A	#N/A	#N/A	#N/A	#N/A
263119	RP11-626G11.5	16	19074021	19085386	354.53	709	0	0	0	1	0	0	1	#N/A	#N/A	#N/A	#N/A	#N/A	#N/A
241460	BUB1B	15	40509440	40509732	354.493	710	0	0	0	1	1	0	0	ENSG00000156970	22.9167	0.790446	17.7676	0.156548	0.466067
241460	PAK6	15	40509440	40509732	354.493	710	0	0	0	1	1	0	0	ENSG00000137843	0.0732944	0.0898617	0.198768	0.0383364	0.111217
241460	RP11-133K1.2	15	40509440	40509732	354.493	710	0	0	0	1	1	0	0	ENSG00000259288	0.00159911	0.00187475	0.00272442	0.00153342	0.00282191
262390	RNU6-213P	16	15967544	15973082	354.493	711	0	0	1	1	1	0	0	ENSG00000206778	2.99e-05	2.74282e-05	2.18297e-05	2.4633e-05	0.000117263
475174	PLXND1	3	129310581	129328913	354.346	712	1	0	0	1	0	0	0	ENSG00000004399	17.1365	58.3326	15.6495	0.697904	0.331011
76319	CXCL12	10	44874839	44889195	354.292	713	0	0	1	1	1	0	0	ENSG00000107562	0.0221783	0.0114953	0.11505	0.00997542	0.0294841
543683	MND1	4	154260455	154267166	353.689	714	0	0	1	1	1	1	0	ENSG00000121211	7.61789	0.312985	2.75088	0.115914	0.353134
357345	MAT2A	2	85765298	85769112	353.496	715	0	0	1	1	1	0	0	ENSG00000168906	131.787	49.3288	70.343	34.9266	22.7937
590983	TMED7	5	114966358	114971226	351.831	716	0	0	1	1	0	1	0	ENSG00000134970	18.7917	38.8887	28.4953	15.9604	23.0599
37831	FCRL6	1	159768852	159774121	351.466	717	0	0	1	1	1	0	0	ENSG00000181036	0.00398148	0.0919786	0.00796549	0.141669	0.0989417
469913	PLCXD2	3	111447382	111452118	350.765	718	0	1	1	1	1	0	0	ENSG00000240891	0.644756	0.171659	0.0813219	5.13561	0.800121
469913	PHLDB2	3	111447382	111452118	350.765	718	0	0	1	1	1	0	0	ENSG00000144824	0.0220097	0.0240744	0.015634	0.317649	0.0957037
227321	RNU4ATAC14P	14	75665248	75669231	350.699	719	0	0	0	1	0	0	1	ENSG00000252013	2.96913e-05	4.04316e-05	3.24351e-05	3.9126e-05	0.00015263
103794	PRKCDBP	11	6338116	6342459	350.607	720	1	0	0	1	0	0	0	ENSG00000170955	0.171274	2.3253	0.117144	0.00275392	0.00556599
67846	RP11-186N15.3	10	12288804	12297437	350.574	721	0	0	1	1	1	1	0	#N/A	#N/A	#N/A	#N/A	#N/A	#N/A
90804	MARCH5	10	94049742	94053858	350.417	722	1	0	0	1	0	0	0	ENSG00000198060	11.579	7.15011	8.88499	7.53368	19.7639
90804	CPEB3	10	94049742	94053858	350.417	722	1	0	0	1	0	0	0	ENSG00000107864	1.89816	0.864164	0.492544	0.768612	4.97996
53304	KCNH1	1	211302811	211313392	350.262	723	0	0	1	1	1	0	0	ENSG00000143473	0.000295416	4.58659e-05	0.000634874	4.66824e-05	8.90435e-05
53304	KCNH1-IT1	1	211302811	211313392	350.262	723	0	0	1	1	1	0	0	ENSG00000234233	1.08075e-06	9.54968e-07	9.35479e-07	8.59088e-07	3.19074e-06
458287	RYBP	3	72491005	72501692	350.25	724	0	0	0	1	1	0	0	ENSG00000163602	23.7262	7.03744	21.0016	4.766	54.3599
618313	HIST1H4D	6	26187322	26196678	350.026	725	0	0	1	1	0	1	1	ENSG00000188987	1091.94	37.7502	308.362	35.4683	9.64279
618313	HIST1H1PS1	6	26187322	26196678	350.026	725	0	0	1	1	0	1	1	ENSG00000216331	0.246156	0.000309965	0.00437638	0.000471535	0.00151616
283349	SPECC1	17	19891668	19918010	349.723	726	0	0	1	1	1	0	0	ENSG00000128487	34.6213	27.0864	21.5966	0.863016	29.6541
283349	RP11-209D14.2	17	19891668	19918010	349.723	726	0	0	1	1	1	0	0	#N/A	#N/A	#N/A	#N/A	#N/A	#N/A
404832	TRMT6	20	5929472	5933156	349.063	727	0	0	1	1	1	1	0	ENSG00000089195	4.18049	6.11827	4.8997	4.59026	0.956865
404832	MCM8	20	5929472	5933156	349.063	727	0	0	1	1	1	1	0	ENSG00000125885	12.1255	1.3549	5.30629	2.66339	0.49086
76691	ZFAND4	10	46167435	46171636	348.634	728	0	0	1	1	0	0	1	ENSG00000172671	15.922	1.44686	2.76803	11.8608	5.09939
359245	LMAN2L	2	97400983	97410766	347.868	729	0	0	0	1	0	0	1	ENSG00000114988	3.14939	6.28374	3.13465	2.20585	2.4338
693622	IFRD1	7	112061847	112064070	347.659	730	1	0	0	1	0	0	0	ENSG00000006652	22.8013	23.6934	57.041	24.178	547.503
466786	ZPLD1	3	101815735	101821460	347.642	731	0	0	0	1	0	1	0	ENSG00000170044	0.000680647	0.00148281	0.000822894	0.0015396	0.00333412
328883	POU2F2	19	42628923	42637124	347.494	732	0	0	1	1	0	1	1	ENSG00000028277	0.511537	2.88044	0.285597	3.33947	11.2091
328883	CTC-378H22.1	19	42628923	42637124	347.494	732	0	0	1	1	0	1	1	#N/A	#N/A	#N/A	#N/A	#N/A	#N/A
330557	CEACAM18	19	51977821	51987569	347.309	733	0	0	1	1	1	0	0	ENSG00000213822	4.75114e-05	0.000110346	7.49572e-05	9.41008e-05	0.000287461
82408	JMJD1C	10	65224180	65225972	346.73	734	0	0	1	1	0	0	0	ENSG00000171988	55.1454	22.2128	20.6655	44.5694	516.805
82408	JMJD1C-AS1	10	65224180	65225972	346.73	734	0	0	1	1	0	0	0	ENSG00000272767	#N/A	#N/A	#N/A	#N/A	#N/A
10423	PIK3R3	1	46641231	46646646	346.584	735	0	0	1	1	1	0	0	ENSG00000117461	2.71931	0.370192	1.20206	0.063487	0.0589064
10423	RP11-322N21.2	1	46641231	46646646	346.584	735	0	0	1	1	1	0	0	ENSG00000250719	1.26352e-06	1.76117e-06	2.22459e-06	2.11404e-06	6.04453e-06
158482	CDK4	12	58141865	58150539	346.031	736	0	0	0	1	0	1	0	ENSG00000135446	68.2655	21.7228	52.4404	7.81883	0.323719
158482	MARCH9	12	58141865	58150539	346.031	736	0	0	0	1	0	1	0	ENSG00000139266	2.97421	2.58215	3.63177	10.5591	0.0440741
470327	GTPBP8	3	112708132	112709938	345.994	737	0	0	0	1	1	0	0	ENSG00000163607	8.5731	4.24227	7.38263	8.93325	2.39189
398296	AC016712.1	2	223560426	223564962	345.748	738	1	0	0	1	0	0	0	#N/A	#N/A	#N/A	#N/A	#N/A	#N/A
398296	snoU13	2	223560426	223564962	345.748	738	0	1	0	1	0	0	0	#N/A	#N/A	#N/A	#N/A	#N/A	#N/A
122933	FCHSD2	11	72848910	72858582	345.705	739	0	0	0	1	1	0	0	ENSG00000137478	5.40762	6.46608	3.40292	10.2844	42.6787
539485	MAML3	4	141074989	141075794	345.625	740	0	0	1	1	1	1	0	ENSG00000196782	2.50554	1.90579	15.2875	1.20231	29.2998
268165	snoU13	16	50380961	50388364	345.532	741	0	1	1	1	0	1	1	#N/A	#N/A	#N/A	#N/A	#N/A	#N/A
12631	SSBP3	1	54875902	54879620	345.493	742	0	0	1	1	0	1	0	ENSG00000157216	21.4003	17.5366	11.8966	18.7588	4.47796
584649	AC008592.4	5	95187970	95189230	345.266	743	0	0	1	1	1	1	0	#N/A	#N/A	#N/A	#N/A	#N/A	#N/A
30262	EPS8L3	1	110305446	110308195	344.989	744	0	0	1	1	1	0	0	ENSG00000198758	0.0270809	0.0185036	0.0157451	0.0274271	0.0663153
43441	RASAL2	1	178061630	178066304	344.974	745	0	0	0	1	1	0	0	ENSG00000075391	1.54303	6.585	12.6993	0.00786892	0.0300815
43441	RASAL2-AS1	1	178061630	178066304	344.974	745	0	0	0	1	1	0	0	ENSG00000224687	0.0500091	0.207566	0.344474	0.00195311	0.0234798
631637	RP11-505P4.6	6	74202227	74206134	344.221	746	1	0	0	1	0	0	0	#N/A	#N/A	#N/A	#N/A	#N/A	#N/A
618330	HIST1H4G	6	26244367	26249842	344.206	747	0	0	1	1	1	0	0	ENSG00000124578	0.423371	1.98198e-06	1.47423e-06	2.17685e-06	6.12432e-06
619744	NFKBIL1	6	31511143	31522203	343.589	748	0	0	1	1	1	0	1	ENSG00000204498	3.82089	4.66976	4.3075	2.77475	6.37797
619744	ATP6V1G2-DDX39B	6	31511143	31522203	343.589	748	0	0	1	1	1	0	1	ENSG00000254870	0.0652985	0.267322	0.00714064	0.678809	0.248473
619744	ATP6V1G2	6	31511143	31522203	343.589	748	0	0	1	1	1	0	1	ENSG00000213760	0.127185	0.0788409	0.185707	1.00936	0.704643
406352	JAG1	20	10652126	10657723	343.539	749	1	0	0	1	0	0	0	ENSG00000101384	2.60891	3.60618	1.25238	0.0465804	2.62275
406352	RP11-103J8.1	20	10652126	10657723	343.539	749	1	0	0	1	0	0	0	#N/A	#N/A	#N/A	#N/A	#N/A	#N/A
429680	CECR2	22	17839550	17848230	343.253	750	1	0	0	1	0	0	0	ENSG00000099954	0.0154509	0.113639	0.0148466	0.00337338	0.00700601
340211	FAM179A	2	29177007	29182099	343.241	751	0	0	1	1	1	1	0	ENSG00000189350	0.0700192	0.398068	0.0168096	0.232506	0.128554
402327	RNU6-1051P	2	237922085	237925461	342.668	752	1	0	0	1	0	0	0	ENSG00000202341	2.40469e-05	3.05505e-05	2.44572e-05	4.25503e-05	8.9664e-05
77262	GDF10	10	48435607	48448088	342.409	753	0	0	0	1	0	1	0	ENSG00000107623	2.24122e-05	4.87257e-05	3.47875e-05	0.072338	0.000120692
404364	ADRA1D	20	4223812	4231069	342.382	754	1	0	0	1	0	0	0	ENSG00000171873	5.75589e-05	5.37411e-07	2.02984e-07	1.97252e-07	6.85767e-07
283611	DHRS7B	17	21019708	21034238	341.787	755	0	0	0	1	0	0	1	ENSG00000109016	7.79326	12.0518	13.281	1.92681	20.4439
604556	C5orf54	5	159822091	159829658	341.615	756	0	0	1	1	1	0	1	ENSG00000221886	0.588566	0.493348	1.55602	0.0688528	0.0838581
161958	MDM1	12	68723761	68734650	341.262	757	0	0	1	1	1	0	0	ENSG00000111554	8.32955	7.18311	32.0513	12.3239	14.048
161958	RP11-81H14.2	12	68723761	68734650	341.262	757	0	0	1	1	1	0	0	#N/A	#N/A	#N/A	#N/A	#N/A	#N/A
266159	ZNF720	16	31716086	31731786	340.591	758	0	0	1	1	0	0	1	ENSG00000197302	4.40784	5.62101	3.74787	8.80199	6.47196
266159	CLUHP3	16	31716086	31731786	340.591	758	0	0	1	1	0	0	1	ENSG00000131797	2.65897	0.213715	0.0862096	20.9718	0.0209223
266159	CTD-2358C21.4	16	31716086	31731786	340.591	758	0	0	1	1	0	0	1	#N/A	#N/A	#N/A	#N/A	#N/A	#N/A
43598	C1orf220	1	178500099	178517683	340.528	759	0	0	1	1	0	0	0	ENSG00000213057	0.302611	0.0695629	0.0774491	0.0543761	0.00129816
43598	C1ORF220	1	178500099	178517683	340.528	759	0	0	1	1	0	0	0	#N/A	#N/A	#N/A	#N/A	#N/A	#N/A
90323	HTR7	10	92612964	92621830	340.436	760	1	0	0	1	0	0	0	ENSG00000148680	0.583956	0.0948065	0.00155715	0.00240608	0.00239887
766538	KLF9	9	73021871	73033682	340.314	761	1	0	0	1	0	0	0	ENSG00000119138	14.2544	9.09405	18.1576	19.7508	0.59965
645144	KPNA5	6	117001890	117003880	340.097	762	0	0	1	1	1	1	0	ENSG00000196911	2.40256	3.50733	3.0094	29.1285	3.21892
484704	RNU2-31P	3	159522426	159530915	339.981	763	0	0	0	1	1	0	0	ENSG00000252763	1.15693e-05	9.5256e-06	1.24046e-05	1.33348e-05	4.90299e-05
38491	C1orf226	1	162346428	162349957	339.852	764	1	0	0	1	0	0	0	ENSG00000239887	0.184011	0.231782	1.14493	0.00192518	0.143843
38491	C1orf111	1	162346428	162349957	339.852	764	1	0	0	1	0	0	0	ENSG00000171722	0.00114344	0.000226928	0.000132863	0.000139447	0.000484214
45355	SNORD112	1	184635857	184648055	339.167	765	0	0	0	1	1	0	0	#N/A	#N/A	#N/A	#N/A	#N/A	#N/A
618301	HIST1H4C	6	26097561	26107989	338.871	766	0	0	1	1	0	0	0	ENSG00000197061	948.673	30.9974	321.193	60.1054	27.9149
337770	TTC32	2	20099736	20102869	338.783	767	0	0	1	1	1	1	0	ENSG00000183891	16.0539	6.47814	10.4361	28.9042	35.9593
337770	RP11-79O8.1	2	20099736	20102869	338.783	767	0	0	1	1	1	1	0	#N/A	#N/A	#N/A	#N/A	#N/A	#N/A
104196	OR10AB1P	11	7749253	7749866	338.071	768	1	0	0	1	0	0	0	ENSG00000176716	3.43972e-07	8.85893e-07	3.45581e-07	0.000407418	1.9378e-06
23210	LMO4	1	87793596	87795680	338.061	769	0	0	0	1	1	0	0	ENSG00000143013	17.0397	20.9831	7.09852	2.11333	16.6104
487251	PDCD10	3	167447672	167453784	337.791	770	0	0	0	1	0	1	0	ENSG00000114209	49.4187	39.1622	65.854	20.7198	65.7075
487251	SERPINI1	3	167447672	167453784	337.791	770	0	0	0	1	0	1	0	ENSG00000163536	3.43655	0.971697	5.23182	0.806264	0.199789
444652	NGLY1	3	25818486	25830403	337.779	771	0	1	0	1	0	1	1	ENSG00000151092	16.4614	16.6636	19.4822	19.7756	60.0558
444652	OXSM	3	25818486	25830403	337.779	771	0	1	0	1	0	1	1	ENSG00000151093	4.52931	3.32674	4.70267	3.00325	1.40527
539522	SCOC	4	141176696	141190419	337.56	772	0	0	0	1	1	0	1	ENSG00000153130	11.0418	17.3417	13.9106	8.1382	3.58396
162049	SNORA70G	12	69019902	69022457	337.49	773	0	0	1	1	1	0	0	ENSG00000206650	1.19038e-05	1.26731e-05	1.12553e-05	1.34936e-05	5.64665e-05
162049	RP11-254B13.4	12	69019902	69022457	337.49	773	0	0	1	1	1	0	0	#N/A	#N/A	#N/A	#N/A	#N/A	#N/A
706203	PAXIP1-AS2	7	154718902	154726320	336.58	774	0	1	1	1	1	1	1	ENSG00000214106	1.37847	3.36591	0.401284	4.97055	2.46578
385446	RNU6ATAC19P	2	182600183	182603469	336.34	775	0	0	1	1	1	0	0	ENSG00000221023	1.61006e-05	2.47934e-05	3.00515e-05	3.35702e-05	0.000115586
234583	WARS	14	100835243	100851501	336.124	776	0	0	0	1	1	0	0	ENSG00000140105	68.9471	209.12	32.1722	7.81285	101.995
234583	WDR25	14	100835243	100851501	336.124	776	0	0	0	1	1	0	0	ENSG00000176473	2.89497	3.56388	2.38066	1.87454	4.67512
167745	NTS	12	86266460	86278365	336.119	777	0	0	1	1	1	0	0	ENSG00000133636	0.775898	0.000597806	0.0457131	0.00082644	0.0019302
289426	SPATA20	17	48610731	48630369	335.827	778	0	0	0	1	1	0	0	ENSG00000006282	1.81105	14.6798	3.60079	4.30348	0.302255
289426	EPN3	17	48610731	48630369	335.827	778	0	0	0	1	1	0	0	ENSG00000049283	0.107278	0.0392463	0.0440385	0.0357567	0.127615
289426	RP11-94C24.8	17	48610731	48630369	335.827	778	0	0	0	1	1	0	0	#N/A	#N/A	#N/A	#N/A	#N/A	#N/A
582310	LINC00461	5	87971924	87977835	335.671	779	0	1	1	1	1	1	1	ENSG00000245526	0.0218713	0.0301458	0.0425911	0.0319345	0.113619
582310	CTC-467M3.1	5	87971924	87977835	335.671	779	0	1	1	1	1	1	1	#N/A	#N/A	#N/A	#N/A	#N/A	#N/A
93636	CNNM2	10	104673556	104680672	335.403	780	0	0	1	1	1	0	0	ENSG00000148842	6.88227	1.09071	1.87769	2.3727	0.37258
93636	RP11-724N1.1	10	104673556	104680672	335.403	780	0	0	1	1	1	0	0	#N/A	#N/A	#N/A	#N/A	#N/A	#N/A
30860	DDX20	1	112294296	112300306	335.304	781	0	0	1	1	1	0	1	ENSG00000064703	5.02725	4.85286	4.37101	9.2253	2.91338
30860	FAM212B	1	112294296	112300306	335.304	781	0	0	1	1	1	0	1	ENSG00000197852	1.12826	2.20324	3.8128	0.224793	95.0497
521404	NKX6-1	4	85415545	85421522	335.273	782	0	0	0	1	1	0	0	ENSG00000163623	4.75625e-05	5.95277e-05	4.72972e-05	6.20501e-05	0.000235561
65879	UCN3	10	5399099	5407196	335.177	783	1	0	0	1	0	0	0	ENSG00000178473	6.44265e-07	7.83014e-07	1.9551e-05	7.57934e-07	2.32176e-06
331315	BRSK1	19	55794659	55803086	334.693	784	0	0	1	1	1	1	0	ENSG00000160469	0.100877	0.0213147	1.23429	0.344862	0.0324055
337901	PUM2	2	20549888	20554524	334.439	785	0	0	1	1	0	1	1	ENSG00000055917	29.7944	14.1038	29.2994	31.244	105.74
337901	AC007041.1	2	20549888	20554524	334.439	785	0	0	1	1	0	1	1	#N/A	#N/A	#N/A	#N/A	#N/A	#N/A
127382	RP11-164N3.2	11	87830428	87834399	333.878	786	0	0	1	1	1	0	0	#N/A	#N/A	#N/A	#N/A	#N/A	#N/A
127382	RP11-164N3.3	11	87830428	87834399	333.878	786	0	0	1	1	1	0	0	#N/A	#N/A	#N/A	#N/A	#N/A	#N/A
127382	Y_RNA	11	87830428	87834399	333.878	786	0	0	1	1	1	0	0	#N/A	#N/A	#N/A	#N/A	#N/A	#N/A
631682	CD109	6	74405144	74406775	333.788	787	1	0	0	1	0	0	0	ENSG00000156535	1.97983	4.27594	15.8745	0.271561	0.0205747
631682	RP11-553A21.3	6	74405144	74406775	333.788	787	1	0	0	1	0	0	0	#N/A	#N/A	#N/A	#N/A	#N/A	#N/A
529672	GAR1	4	110736003	110739019	333.655	788	0	0	1	1	1	1	0	ENSG00000109534	7.71567	2.29501	3.76945	2.57948	0.875908
529672	RP11-602N24.3	4	110736003	110739019	333.655	788	0	0	1	1	1	1	0	#N/A	#N/A	#N/A	#N/A	#N/A	#N/A
287570	CNP	17	40117012	40119906	333.631	789	1	0	0	1	0	0	0	ENSG00000173786	12.616	15.3093	13.6806	6.46856	6.96326
155500	ARID2	12	46118831	46137446	333.625	790	0	0	0	1	1	0	0	ENSG00000189079	16.8647	6.49186	19.0895	15.753	19.5395
155500	LINC00938	12	46118831	46137446	333.625	790	0	0	0	1	1	0	0	ENSG00000273015	#N/A	#N/A	#N/A	#N/A	#N/A
210610	OR4L1	14	20526717	20528759	333.473	791	0	0	1	1	0	0	0	ENSG00000176246	5.9831e-07	5.11572e-07	5.67e-07	5.59669e-07	2.37561e-06
567741	RPL37	5	40835353	40841380	333.351	792	1	0	0	1	0	0	0	ENSG00000145592	772.544	558.816	556.448	1964.92	149.771
567741	CARD6	5	40835353	40841380	333.351	792	1	0	0	1	0	0	0	ENSG00000132357	2.48458	7.02566	4.0114	0.326138	10.1737
68797	snoU13	10	15924220	15931603	332.826	793	0	1	0	1	0	0	0	#N/A	#N/A	#N/A	#N/A	#N/A	#N/A
761059	B4GALT1	9	33163023	33172125	332.593	794	0	0	0	1	0	1	1	ENSG00000086062	5.68982	17.0997	9.61666	4.90269	54.7493
761059	RP11-326F20.5	9	33163023	33172125	332.593	794	0	0	0	1	0	1	1	#N/A	#N/A	#N/A	#N/A	#N/A	#N/A
478799	RNF7	3	141443615	141459087	332.379	795	0	0	1	1	1	0	0	ENSG00000114125	14.9304	42.435	21.4498	19.3633	14.6217
376766	AC009227.2	2	155308983	155314644	332.272	796	0	0	0	1	1	0	0	#N/A	#N/A	#N/A	#N/A	#N/A	#N/A
572230	AC008937.2	5	56154298	56165554	331.988	797	0	1	1	1	1	1	1	#N/A	#N/A	#N/A	#N/A	#N/A	#N/A
266026	ZNF646	16	31085710	31087386	331.796	798	0	0	1	1	1	0	0	ENSG00000167395	5.13148	5.2136	3.88925	3.40956	34.0652
332882	ADI1	2	3517384	3523883	331.33	799	0	0	1	1	0	1	0	ENSG00000182551	14.0824	23.2952	15.0191	11.7543	7.86107
332882	AC142528.1	2	3517384	3523883	331.33	799	0	0	1	1	0	1	0	#N/A	#N/A	#N/A	#N/A	#N/A	#N/A
524639	PDLIM5	4	95370467	95374242	330.781	800	0	0	0	1	1	0	0	ENSG00000163110	9.03385	26.8004	42.8152	7.77306	36.0227
524639	AC109925.1	4	95370467	95374242	330.781	800	0	0	0	1	1	0	0	#N/A	#N/A	#N/A	#N/A	#N/A	#N/A
634671	DOPEY1	6	83775216	83785627	330.724	801	0	0	1	1	1	1	0	ENSG00000083097	2.66118	5.14476	3.61734	12.688	3.11993
634671	UBE3D	6	83775216	83785627	330.724	801	0	0	1	1	1	1	0	ENSG00000118420	2.2571	1.40422	1.62902	4.31509	0.127652
634671	AL139333.1	6	83775216	83785627	330.724	801	0	0	1	1	1	1	0	#N/A	#N/A	#N/A	#N/A	#N/A	#N/A
103119	RRM1	11	4115324	4123273	330.642	802	0	0	1	1	1	1	0	ENSG00000167325	46.2506	9.01365	19.6989	10.1046	1.29015
399553	IRS1	2	227659397	227668143	329.704	803	1	0	0	1	0	0	0	ENSG00000169047	2.00562	0.212206	2.5315	0.719517	0.000709826
399553	RP11-395N3.2	2	227659397	227668143	329.704	803	1	0	0	1	0	0	0	#N/A	#N/A	#N/A	#N/A	#N/A	#N/A
61772	CHRM3-AS1	1	240061488	240069261	329.445	804	0	0	0	1	1	1	0	ENSG00000234601	0.000129791	1.42897e-06	2.1279e-06	1.24187e-06	4.25446e-06
35415	PLEKHO1	1	150113719	150130464	329.371	805	0	0	1	1	1	1	0	ENSG00000023902	4.07829	80.1975	24.56	12.9147	114.534
747449	TG	8	133876406	133879760	329.249	806	0	0	1	1	1	1	0	ENSG00000042832	0.134541	0.213336	0.143828	0.414898	8.02637
495428	HES1	3	193850191	193857559	328.824	807	0	0	1	1	1	0	0	ENSG00000114315	1.97779	0.0127892	1.45721	0.00457479	0.235562
85577	RP11-77G23.5	10	76781131	76784439	328.472	808	0	0	1	1	1	1	0	#N/A	#N/A	#N/A	#N/A	#N/A	#N/A

## Sheet: MK_SIPs
baitID	baitName	baitChr	baitStart	baitEnd	intscore	rank	specific	shared	SIP.Ery	SIP.MacMon	SIP.MK	SIP.nCD4	SIP.Neu	ENSEMBL_GENEID	Ery	MacMon	MK	nCD4	Neu
301599	LDLRAD4	18	13216144	13218929	1788.48	1	0	0	1	1	1	1	0	ENSG00000168675	6.42646	8.30607	23.0902	13.9178	7.03375
301599	RP11-794M8.1	18	13216144	13218929	1788.48	1	0	0	1	1	1	1	0	#N/A	#N/A	#N/A	#N/A	#N/A	#N/A
95927	SMNDC1	10	112061091	112067985	1691.69	2	0	1	1	1	1	1	1	ENSG00000119953	10.5421	6.34154	12.2569	9.81939	32.1273
468737	CD47	3	107809073	107817390	1688.93	3	0	0	1	1	1	0	1	ENSG00000196776	49.3234	62.1104	209.148	82.8357	76.8481
618010	RP3-522P13.1	6	25254994	25266229	1564.4	4	0	0	1	1	1	1	0	#N/A	#N/A	#N/A	#N/A	#N/A	#N/A
618010	RP3-522P13.3	6	25254994	25266229	1564.4	4	0	0	1	1	1	1	0	#N/A	#N/A	#N/A	#N/A	#N/A	#N/A
239267	RYR3	15	33599049	33605679	1563.22	5	0	0	1	0	1	0	0	ENSG00000198838	2.51322	0.0146386	2.93236	0.0186898	0.0448471
239267	RP11-489D6.2	15	33599049	33605679	1563.22	5	0	0	1	0	1	0	0	#N/A	#N/A	#N/A	#N/A	#N/A	#N/A
495425	RP11-135A1.2	3	193847776	193849045	1559.45	6	0	0	1	1	1	0	0	#N/A	#N/A	#N/A	#N/A	#N/A	#N/A
575102	ADAMTS6	5	64777556	64778174	1508.44	7	0	0	1	1	1	1	0	ENSG00000049192	0.895145	0.273552	0.894438	3.34677	0.0283579
176716	MED13L	12	116714223	116718352	1488.53	8	0	1	1	1	1	1	1	ENSG00000123066	33.8541	16.416	21.2979	39.1272	290.516
135697	NNMT	11	114127328	114130511	1487.22	9	0	1	1	1	1	1	1	ENSG00000166741	0.00937446	0.0206702	0.0517763	0.052624	0.0444055
683131	PTPN12	7	77161674	77168472	1452.26	10	0	1	1	1	1	1	1	ENSG00000127947	11.4426	22.3948	58.938	3.01033	144.201
246874	ADAM10	15	59040631	59042709	1412.82	11	0	0	1	1	1	1	0	ENSG00000137845	27.1058	63.0397	170.494	33.81	184.835
545471	PPID	4	159642400	159646003	1382.01	12	0	1	1	1	1	1	1	ENSG00000171497	11.017	16.441	13.2937	9.44098	18.2803
618793	HIST1H3H	6	27776624	27782228	1377.82	13	0	1	1	1	1	1	1	ENSG00000203813	843.862	12.7163	498.309	27.2094	5.52323
427447	ETS2	21	40174503	40179024	1355.23	14	0	0	1	1	1	0	0	ENSG00000157557	13.0477	4.65831	31.3553	2.05426	90.2487
709190	AGPAT5	8	6563788	6569025	1346.04	15	0	0	1	1	1	1	0	ENSG00000155189	25.9126	4.46861	20.9331	3.74021	0.297159
709190	CTD-2541M15.1	8	6563788	6569025	1346.04	15	0	0	1	1	1	1	0	#N/A	#N/A	#N/A	#N/A	#N/A	#N/A
618605	HIST1H2BK	6	27113447	27115524	1328.56	16	0	0	1	1	1	1	0	ENSG00000197903	795.22	89.6314	398.101	46.5763	82.4457
618605	HIST1H2AH	6	27113447	27115524	1328.56	16	0	0	1	1	1	1	0	ENSG00000184825	687.594	8.86157	241.939	6.30879	2.8195
618605	MIR3143	6	27113447	27115524	1328.56	16	0	0	1	1	1	1	0	ENSG00000265565	6.83567e-05	7.12037e-05	7.03027e-05	7.94879e-05	0.000279928
718428	WHSC1L1	8	38237182	38242579	1317.02	17	0	1	1	1	1	1	1	ENSG00000147548	22.4932	14.5518	19.8235	61.1029	88.1471
718428	RP11-350N15.5	8	38237182	38242579	1317.02	17	0	1	1	1	1	1	1	#N/A	#N/A	#N/A	#N/A	#N/A	#N/A
618015	LRRC16A	6	25276461	25285841	1300.48	18	0	0	1	1	1	1	0	ENSG00000079691	1.94917	1.91271	18.6636	4.47586	0.0447495
709153	ANGPT2	8	6418661	6423639	1299.33	19	0	0	1	0	1	0	0	ENSG00000091879	0.0107902	0.00210333	0.000643546	0.00818288	0.00197009
527386	SLC9B1	4	103935166	103941497	1289.88	20	0	1	1	1	1	1	1	ENSG00000164037	0.333896	0.37186	1.06588	2.07397	0.0618588
517800	IL8	4	74604292	74606314	1263.91	21	0	0	0	1	1	0	1	ENSG00000169429	42.2103	28.1948	216.113	0.0449525	2552.89
772460	GADD45G	9	92217015	92221435	1233.54	22	0	1	1	1	1	1	1	ENSG00000130222	2.66178	2.58734	0.853076	0.0288422	6.11234
466198	TBC1D23	3	99975954	99981154	1225.65	23	0	1	1	1	1	1	1	ENSG00000036054	19.9571	16.3719	19.3591	10.125	32.819
125742	PCF11	11	82867223	82868255	1208.53	24	0	1	1	1	1	1	1	ENSG00000165494	29.1246	33.1421	34.597	88.9962	199.927
162049	SNORA70G	12	69019902	69022457	1199.49	25	0	0	1	1	1	0	0	ENSG00000206650	1.19038e-05	1.26731e-05	1.12553e-05	1.34936e-05	5.64665e-05
162049	RP11-254B13.4	12	69019902	69022457	1199.49	25	0	0	1	1	1	0	0	#N/A	#N/A	#N/A	#N/A	#N/A	#N/A
545596	RAPGEF2	4	160021754	160027306	1196.28	26	0	0	1	0	1	1	1	ENSG00000109756	96.5421	29.2681	38.2973	9.46902	256.213
476281	TMEM108	3	132753821	132759574	1176.54	27	0	0	1	0	1	0	0	ENSG00000144868	0.0697564	0.0107798	0.930278	0.0128431	0.045479
476281	RP11-469L4.1	3	132753821	132759574	1176.54	27	0	0	1	0	1	0	0	#N/A	#N/A	#N/A	#N/A	#N/A	#N/A
581857	RASA1	5	86559609	86565202	1163.7	28	0	1	1	1	1	1	1	ENSG00000145715	10.9161	15.4402	32.1237	12.9643	14.9518
765974	PIP5K1B	9	71315116	71321918	1162.25	29	0	0	1	0	1	0	1	ENSG00000107242	29.6226	0.372021	6.57225	0.13459	7.56326
424476	RNU6-872P	21	30112950	30117523	1156.91	30	0	0	1	1	1	1	0	ENSG00000251894	2.54037e-05	4.73786e-05	4.52181e-05	4.76907e-05	0.000132683
477302	STAG1	3	136465351	136472558	1151.43	31	0	1	1	1	1	1	1	ENSG00000118007	16.9564	10.2478	15.3707	19.94	47.4653
477302	RP11-102M11.2	3	136465351	136472558	1151.43	31	0	1	1	1	1	1	1	#N/A	#N/A	#N/A	#N/A	#N/A	#N/A
125673	PRCP	11	82610457	82615041	1148.88	32	0	1	1	1	1	1	1	ENSG00000137509	9.66063	68.339	8.17982	6.97555	74.2009
125673	C11orf82	11	82610457	82615041	1148.88	32	0	1	1	1	1	1	1	ENSG00000165490	4.72172	2.73601	2.24033	0.300283	2.07657
654954	STXBP5	6	147521692	147526124	1148.76	33	0	0	1	0	1	0	0	ENSG00000164506	22.3583	7.66533	158.787	14.5594	88.9731
654954	STXBP5-AS1	6	147521692	147526124	1148.76	33	0	0	1	0	1	0	0	ENSG00000233452	0.310295	0.447976	3.00662	0.715787	2.33813
34158	RNU2-38P	1	144941765	144945045	1148.39	34	0	1	1	1	1	1	1	ENSG00000222788	4.84736e-05	4.50649e-05	5.26262e-05	5.50288e-05	0.00022157
129654	RP11-712B9.2	11	94879591	94887222	1123.57	35	0	1	1	1	1	1	1	#N/A	#N/A	#N/A	#N/A	#N/A	#N/A
617998	RP11-191A15.4	6	25214810	25223692	1120.27	36	0	0	1	1	1	1	0	#N/A	#N/A	#N/A	#N/A	#N/A	#N/A
210745	RNASE11	14	21076915	21084877	1118.27	37	0	1	1	1	1	1	1	ENSG00000173464	0.0107026	0.0135668	0.0118398	0.0138618	0.0517969
289005	HOXB3	17	46660464	46668809	1114.43	38	0	0	1	1	1	1	0	ENSG00000120093	1.27295	0.0261368	1.34026	0.644999	0.0600476
289005	HOXB-AS3	17	46660464	46668809	1114.43	38	0	0	1	1	1	1	0	ENSG00000233101	0.0355555	0.0460385	0.0490579	0.0471214	0.164076
539485	MAML3	4	141074989	141075794	1114.05	39	0	0	1	1	1	1	0	ENSG00000196782	2.50554	1.90579	15.2875	1.20231	29.2998
572732	PLK2	5	57752380	57757252	1110.78	40	0	0	1	1	1	1	0	ENSG00000145632	5.47079	1.26182	1.00176	1.66194	9.44247
727693	NCOA2	8	71313105	71317335	1092.81	41	0	1	1	1	1	1	1	ENSG00000140396	14.1907	10.1116	14.2572	16.3749	176.816
535855	JADE1	4	129730071	129736122	1057.13	42	0	0	1	1	1	1	0	ENSG00000077684	14.1351	3.85314	7.89803	16.275	41.0946
35392	VPS45	1	150038459	150040151	1056.99	43	0	0	1	1	1	0	0	ENSG00000136631	8.99194	14.4895	13.8515	10.2441	0.511114
766064	PRKACG	9	71624507	71632801	1049.81	44	0	1	1	1	1	1	1	ENSG00000165059	6.30662e-05	3.01209e-07	2.0293e-07	2.99798e-07	1.29391e-06
286149	SLFN12L	17	33861853	33864995	1046.3	45	0	1	1	1	1	1	1	ENSG00000205045	0.611474	0.146236	0.0961525	35.6136	0.381386
615437	ATXN1	6	16759205	16763503	1043.95	46	0	0	0	1	1	0	0	ENSG00000124788	2.70781	14.029	1.65788	6.09822	93.3343
615437	RP1-151F17.1	6	16759205	16763503	1043.95	46	0	0	0	1	1	0	0	#N/A	#N/A	#N/A	#N/A	#N/A	#N/A
268169	BRD7	16	50395469	50403807	1040.62	47	0	1	1	1	1	1	1	ENSG00000166164	23.7436	21.7397	27.9989	28.9005	20.2925
268169	RP11-21B23.1	16	50395469	50403807	1040.62	47	0	1	1	1	1	1	1	#N/A	#N/A	#N/A	#N/A	#N/A	#N/A
29786	VAV3	1	108497627	108507082	1036.57	48	0	0	1	1	1	1	0	ENSG00000134215	3.77518	4.21665	17.8277	2.55119	52.5202
29786	VAV3-AS1	1	108497627	108507082	1036.57	48	0	0	1	1	1	1	0	ENSG00000230489	0.000169099	0.000220664	0.001728	9.83343e-07	0.00961827
37823	DUSP23	1	159749526	159753587	1033.61	49	0	0	1	1	1	0	0	ENSG00000158716	4.94323	24.0078	16.1323	3.13422	11.1188
410114	THBD	20	23027371	23034119	1027.57	50	0	0	1	1	1	0	1	ENSG00000178726	2.10014	0.530969	4.98542	0.00552596	37.4478
390635	PLCL1	2	198668910	198670337	1026.09	51	0	0	1	1	1	1	0	ENSG00000115896	0.896734	4.26676	1.04116	18.6076	2.81137
387325	CALCRL	2	188312875	188314531	1026.04	52	0	0	1	1	1	0	0	ENSG00000064989	0.649387	1.63643	0.27129	0.491601	0.183773
745034	SQLE	8	126007452	126015447	1024.17	53	0	0	1	1	1	0	0	ENSG00000104549	43.9984	10.4088	130.072	1.69684	0.320459
745034	RP11-6D1.3	8	126007452	126015447	1024.17	53	0	0	1	1	1	0	0	#N/A	#N/A	#N/A	#N/A	#N/A	#N/A
618814	HIST1H1B	6	27834351	27837620	1020.8	54	0	1	1	1	1	1	1	ENSG00000184357	1561.56	11.4028	565.383	5.05053	4.33652
732526	CA2	8	86374486	86381631	1018.52	55	0	1	1	1	1	1	1	ENSG00000104267	25.3482	28.051	17.5164	0.0421203	1.2016
732526	RP11-317J10.2	8	86374486	86381631	1018.52	55	0	1	1	1	1	1	1	#N/A	#N/A	#N/A	#N/A	#N/A	#N/A
161958	MDM1	12	68723761	68734650	1011.48	56	0	0	1	1	1	0	0	ENSG00000111554	8.32955	7.18311	32.0513	12.3239	14.048
161958	RP11-81H14.2	12	68723761	68734650	1011.48	56	0	0	1	1	1	0	0	#N/A	#N/A	#N/A	#N/A	#N/A	#N/A
618316	HIST1H3D	6	26196886	26199681	1002.03	57	0	1	1	1	1	1	1	ENSG00000197409	597.213	18.7233	236.833	42.3592	38.6729
618316	HIST1H2AD	6	26196886	26199681	1002.03	57	0	1	1	1	1	1	1	ENSG00000196866	236.795	8.98448	157.128	13.5618	20.2755
655522	RP11-162J8.3	6	149352592	149354190	1001.91	58	0	1	1	1	1	1	1	#N/A	#N/A	#N/A	#N/A	#N/A	#N/A
97090	RNU6-709P	10	115862998	115872187	989.343	59	0	0	1	1	1	0	0	ENSG00000253066	1.90488e-05	2.86798e-05	2.23309e-05	3.04757e-05	8.96467e-05
258646	SNRPA1	15	101833589	101835950	984.296	60	0	0	1	1	1	0	1	ENSG00000131876	21.6731	19.002	19.8905	33.2359	4.83501
258646	RP11-299G20.2	15	101833589	101835950	984.296	60	0	0	1	1	1	0	1	#N/A	#N/A	#N/A	#N/A	#N/A	#N/A
393604	FZD5	2	208630833	208640808	982.109	61	0	0	1	1	1	0	0	ENSG00000163251	6.12748	1.0013	0.757492	0.0168173	0.460777
604427	ADRA1B	5	159341749	159345488	974.553	62	0	0	1	1	1	0	0	ENSG00000170214	1.28942e-07	4.57383e-07	2.92937e-07	2.61379e-07	9.38927e-07
136563	SIK3	11	116968002	116974060	970.668	63	0	1	1	1	1	1	1	ENSG00000160584	15.1797	7.78039	6.37627	11.1881	82.603
136563	AP000936.4	11	116968002	116974060	970.668	63	0	1	1	1	1	1	1	#N/A	#N/A	#N/A	#N/A	#N/A	#N/A
348163	RNU6-433P	2	55241156	55243362	970.404	64	0	1	1	1	1	1	1	ENSG00000200086	3.33966e-05	2.78046e-05	1.63142e-05	3.30184e-05	8.86471e-05
229055	GTF2A1	14	81685218	81688296	956.046	65	0	1	1	1	1	1	1	ENSG00000165417	11.6525	7.85732	20.6595	7.94501	20.0407
716104	GTF2E2	8	30514629	30526394	950.296	66	0	0	1	0	1	1	1	ENSG00000197265	6.20325	13.1007	7.65042	9.91871	11.9584
228969	TSHR	14	81420768	81423583	948.714	67	0	1	1	1	1	1	1	ENSG00000165409	0.0194174	0.0111761	0.432013	0.0172946	0.0388622
44696	GLUL	1	182354704	182363894	939.279	68	0	1	1	1	1	1	1	ENSG00000135821	361.551	254.509	424.931	14.6194	2047.36
354129	TACR1	2	75426286	75427250	936.744	69	0	0	1	0	1	0	0	ENSG00000115353	0.000505612	0.000849671	0.000618632	0.00175504	0.00239736
352323	APLF	2	68691196	68695687	936.049	70	0	1	1	1	1	1	1	ENSG00000169621	2.23288	1.52888	4.71047	2.63441	0.767434
352323	FBXO48	2	68691196	68695687	936.049	70	0	1	1	1	1	1	1	ENSG00000204923	0.848384	0.599994	0.587664	0.542168	0.716829
592091	TNFAIP8	5	118600720	118609276	931.669	71	0	1	1	1	1	1	1	ENSG00000145779	13.6875	28.1757	58.5246	115.494	33.6406
663419	GLCCI1	7	8007422	8012181	928.791	72	0	1	1	1	1	1	1	ENSG00000106415	5.59394	0.868178	5.01116	8.81012	16.0239
663419	AC006042.7	7	8007422	8012181	928.791	72	0	1	1	1	1	1	1	#N/A	#N/A	#N/A	#N/A	#N/A	#N/A
253525	C15orf40	15	83679256	83681883	926.493	73	0	1	1	1	1	1	1	ENSG00000169609	5.96223	7.91476	5.08753	7.89042	4.94944
253525	RP11-382A20.7	15	83679256	83681883	926.493	73	0	1	1	1	1	1	1	#N/A	#N/A	#N/A	#N/A	#N/A	#N/A
266104	ARMC5	16	31466454	31469797	923.078	74	0	1	1	1	1	1	1	ENSG00000140691	1.83311	1.50363	3.28115	1.04816	1.09617
718429	LETM2	8	38242580	38252729	922.139	75	0	1	1	1	1	1	1	ENSG00000165046	0.546388	0.593461	0.711593	0.433718	8.91758
709113	MCPH1	8	6261206	6270887	918.021	76	0	0	1	1	1	1	0	ENSG00000147316	9.03616	6.5719	9.02914	11.2847	1.03404
709113	RP11-115C21.2	8	6261206	6270887	918.021	76	0	0	1	1	1	1	0	#N/A	#N/A	#N/A	#N/A	#N/A	#N/A
344502	AC010883.5	2	43455071	43460452	909.282	77	0	1	1	1	1	1	1	#N/A	#N/A	#N/A	#N/A	#N/A	#N/A
142867	CCND2	12	4380818	4386594	908.204	78	0	1	1	1	1	1	1	ENSG00000118971	19.9539	17.1051	22.0903	24.7014	4.8393
142867	CCND2-AS1	12	4380818	4386594	908.204	78	0	1	1	1	1	1	1	ENSG00000256164	0.0001063	0.000350718	0.123867	0.101569	4.59513e-06
142867	CCND2-AS2	12	4380818	4386594	908.204	78	0	1	1	1	1	1	1	ENSG00000255920	1.30552e-06	2.11104e-05	0.000894753	0.00031568	5.36615e-06
302835	CABLES1	18	20711775	20717383	904.86	79	1	0	0	0	1	0	0	ENSG00000134508	4.37046	0.664431	5.81147	0.0661267	0.0573235
302835	AC105247.1	18	20711775	20717383	904.86	79	1	0	0	0	1	0	0	#N/A	#N/A	#N/A	#N/A	#N/A	#N/A
710930	RNU6-842P	8	12900927	12906922	896.656	80	0	0	1	1	1	0	0	ENSG00000206996	1.57502e-05	2.80437e-05	2.9739e-05	2.79971e-05	9.30159e-05
408974	SLC24A3	20	19191466	19199335	891.793	81	0	0	1	1	1	0	0	ENSG00000185052	0.59207	0.0560573	15.3864	8.23221e-05	0.428636
408974	RP11-97N19.2	20	19191466	19199335	891.793	81	0	0	1	1	1	0	0	#N/A	#N/A	#N/A	#N/A	#N/A	#N/A
400909	AC017104.2	2	232316580	232318550	888.89	82	0	0	1	1	1	0	0	#N/A	#N/A	#N/A	#N/A	#N/A	#N/A
293211	SNORA76	17	62222582	62224253	885.716	83	0	0	1	1	1	1	0	ENSG00000266402	15.2892	1.93084	10.4775	15.1396	0.460169
293211	SNORD104	17	62222582	62224253	885.716	83	0	0	1	1	1	1	0	ENSG00000199753	1.58889	0.000596421	7.57663e-05	0.0668959	0.00463214
37831	FCRL6	1	159768852	159774121	882.948	84	0	0	1	1	1	0	0	ENSG00000181036	0.00398148	0.0919786	0.00796549	0.141669	0.0989417
289015	HOXB8	17	46692325	46693111	880.436	85	0	0	1	1	1	0	0	ENSG00000120068	0.0146434	0.0034903	0.00336728	0.00329511	0.0121653
29787	VAV3	1	108507083	108511712	879.997	86	0	0	1	1	1	1	0	ENSG00000134215	3.77518	4.21665	17.8277	2.55119	52.5202
438430	BHLHE40	3	5018512	5025724	879.157	87	0	1	1	1	1	1	1	ENSG00000134107	8.87465	22.384	16.2317	1.70115	41.8024
438430	BHLHE40-AS1	3	5018512	5025724	879.157	87	0	1	1	1	1	1	1	ENSG00000235831	0.0377292	0.175312	0.424492	0.158221	0.155368
779300	RGS3	9	116204107	116209215	875.138	88	0	0	1	1	1	1	0	ENSG00000138835	2.17785	3.41626	9.68176	1.6624	36.1986
257844	IGF1R	15	99191269	99194977	870.077	89	0	1	1	1	1	1	1	ENSG00000140443	9.48109	3.28324	15.9481	19.2093	129.633
44154	ACBD6	1	180471076	180472609	868.302	90	0	0	1	1	1	1	0	ENSG00000135847	12.5516	8.04989	13.1359	16.8487	1.80932
470320	CD200R1	3	112693909	112695161	865.84	91	0	0	1	1	1	0	0	ENSG00000163606	0.816976	0.17841	0.722236	3.94986	0.500795
618822	HIST1H2AM	6	27858120	27861034	862.298	92	0	1	1	1	1	1	1	ENSG00000233224	684.801	16.7619	318.562	12.9835	4.26226
618822	HIST1H3J	6	27858120	27861034	862.298	92	0	1	1	1	1	1	1	ENSG00000197153	304.9	1.44116	116.62	1.47262	0.388914
315353	BCL2	18	60982875	60990419	861.251	93	0	0	1	1	1	1	0	ENSG00000171791	0.968686	2.44985	0.456576	57.2733	0.450871
766012	RP11-203L2.4	9	71458015	71459083	859.747	94	0	0	1	1	1	0	1	#N/A	#N/A	#N/A	#N/A	#N/A	#N/A
423622	APP	21	27540932	27543573	849.518	95	0	0	1	0	1	1	0	ENSG00000142192	20.3435	70.8016	34.444	14.6417	9.13543
423622	AP000230.1	21	27540932	27543573	849.518	95	0	0	1	0	1	1	0	#N/A	#N/A	#N/A	#N/A	#N/A	#N/A
596929	JADE2	5	133907439	133923113	849.114	96	0	1	1	1	1	1	1	ENSG00000043143	2.90176	4.30896	6.96811	27.4706	10.5747
221748	TMEM260	14	56951756	56956828	848.851	97	0	0	1	1	1	1	0	ENSG00000070269	7.29121	5.30241	6.14112	8.81378	34.5625
699184	KLHDC10	7	129700791	129711530	848.515	98	0	0	1	0	1	0	0	ENSG00000128607	5.24536	7.98686	7.71066	5.70176	6.58584
495428	HES1	3	193850191	193857559	847.034	99	0	0	1	1	1	0	0	ENSG00000114315	1.97779	0.0127892	1.45721	0.00457479	0.235562
170220	NUDT4	12	93767445	93774109	845.619	100	0	0	1	1	1	1	0	ENSG00000173598	464.775	12.8297	33.6639	18.0306	11.0635
170220	RP11-486A14.2	12	93767445	93774109	845.619	100	0	0	1	1	1	1	0	#N/A	#N/A	#N/A	#N/A	#N/A	#N/A
438359	EGOT	3	4792448	4794286	845.272	101	0	0	1	1	1	0	1	ENSG00000235947	0.0152882	0.000943744	1.13528e-05	0.00111292	1.31476e-06
583213	ARRDC3	5	90678873	90679948	839.764	102	0	1	1	1	1	1	1	ENSG00000113369	18.4269	10.3945	10.6064	30.2543	200.246
739386	ANGPT1	8	108508434	108513288	835.878	103	0	0	1	0	1	0	0	ENSG00000154188	2.365	0.0416406	74.6522	0.0377316	8.01618
604542	CCNJL	5	159766712	159776138	834.233	104	0	0	1	1	1	0	1	ENSG00000135083	0.298642	0.0131836	2.36223	0.0204961	100.828
136740	DSCAML1	11	117686001	117689951	830.638	105	0	0	0	1	1	0	0	ENSG00000177103	0.000166087	0.000824207	0.000189038	0.0800502	0.000749468
136740	RP11-728F11.3	11	117686001	117689951	830.638	105	0	0	0	1	1	0	0	#N/A	#N/A	#N/A	#N/A	#N/A	#N/A
756988	MLLT3	9	20620671	20623234	828.107	106	0	0	1	0	1	0	0	ENSG00000171843	55.223	0.972933	20.739	47.954	0.15957
262390	RNU6-213P	16	15967544	15973082	823.65	107	0	0	1	1	1	0	0	ENSG00000206778	2.99e-05	2.74282e-05	2.18297e-05	2.4633e-05	0.000117263
171137	CDK17	12	96792262	96795604	820.53	108	0	1	1	1	1	1	1	ENSG00000059758	18.196	18.3207	29.3861	39.0732	82.1036
432939	TIMP3	22	33190122	33206919	819.141	109	0	0	1	1	1	0	0	ENSG00000100234	15.4461	0.323789	85.6298	0.000990013	2.02342e-06
210776	ANG	14	21148274	21153239	805.522	110	0	0	1	1	1	1	0	ENSG00000214274	0.150841	2.07079	0.0933312	0.0253824	0.0215342
210776	RNASE4	14	21148274	21153239	805.522	110	0	0	1	1	1	1	0	ENSG00000258818	0.0431046	1.05907	0.0127867	0.00487885	0.00453085
210776	AL163636.6	14	21148274	21153239	805.522	110	0	0	1	1	1	1	0	#N/A	#N/A	#N/A	#N/A	#N/A	#N/A
402551	RAMP1	2	238766345	238769802	804.602	111	1	0	0	0	1	0	0	ENSG00000132329	0.802661	1.87955	4.08825	0.197117	0.0206684
258635	CHSY1	15	101791053	101798933	803.224	112	0	0	1	1	1	0	1	ENSG00000131873	5.87143	7.81793	11.3178	3.65687	128.814
221161	SAMD4A	14	55030009	55035267	802.691	113	0	0	1	1	1	0	0	ENSG00000020577	0.291176	3.46874	1.31026	0.176124	0.103867
262394	FOPNL	16	15980084	15987977	802.004	114	0	0	1	1	1	0	0	ENSG00000133393	34.4348	13.7603	28.4789	9.56333	4.23363
90985	CYP26A1	10	94831385	94838376	801.455	115	0	0	1	1	1	0	0	ENSG00000095596	0.00160849	0.000262214	0.000600163	0.000878499	0.0254399
450684	LARS2-AS1	3	45549842	45551539	800.541	116	0	0	1	1	1	0	0	ENSG00000232455	1.11377e-06	9.30676e-07	9.12291e-07	9.72732e-07	3.87099e-06
445289	EOMES	3	27762062	27764795	800.476	117	0	0	1	1	1	1	0	ENSG00000163508	0.000582148	0.00548819	0.00139549	0.453025	0.00742936
52141	CD55	1	207491500	207495827	796.091	118	0	1	1	1	1	1	1	ENSG00000196352	22.8246	24.8022	58.8389	55.3177	469.763
359251	CNNM4	2	97425684	97428909	795.991	119	0	1	1	1	1	1	1	ENSG00000158158	1.60874	1.93333	1.99246	0.993713	3.49431
167745	NTS	12	86266460	86278365	794.724	120	0	0	1	1	1	0	0	ENSG00000133636	0.775898	0.000597806	0.0457131	0.00082644	0.0019302
683101	snoU13	7	77047332	77054169	789.181	121	0	1	0	1	1	0	1	#N/A	#N/A	#N/A	#N/A	#N/A	#N/A
633542	LCA5	6	80244324	80248105	788.915	122	0	0	1	0	1	0	0	ENSG00000135338	2.09319	0.0341011	8.29622	0.141949	0.00248268
132009	BIRC2	11	102216438	102219921	788.407	123	0	0	0	1	1	1	1	ENSG00000110330	13.9163	25.7421	15.1168	21.8101	49.0265
241277	THBS1	15	39872009	39875707	785.803	124	0	0	0	1	1	0	0	ENSG00000137801	111.636	1.24129	2283.3	0.71921	0.299141
645098	FAM26D	6	116849474	116856183	783.104	125	0	1	1	1	1	1	1	ENSG00000164451	0.00198751	0.00236695	0.00386812	0.00239486	0.00899857
743447	DEPTOR	8	120884612	120887475	780.146	126	0	0	1	1	1	1	0	ENSG00000155792	0.613417	0.150134	0.223322	0.605145	0.00269763
743447	KB-1471A8.1	8	120884612	120887475	780.146	126	0	0	1	1	1	1	0	#N/A	#N/A	#N/A	#N/A	#N/A	#N/A
60196	IRF2BP2	1	234740384	234749444	776.04	127	0	1	1	1	1	1	1	ENSG00000168264	103.677	30.8216	29.0395	55.3849	36.6449
60196	RP4-781K5.2	1	234740384	234749444	776.04	127	0	1	1	1	1	1	1	#N/A	#N/A	#N/A	#N/A	#N/A	#N/A
673192	VPS41	7	38970151	38972072	771.18	128	0	0	1	0	1	0	0	ENSG00000006715	30.6856	52.3279	34.3804	16.5867	71.1192
357407	AC105053.3	2	86038814	86043064	770.089	129	0	0	1	1	1	0	0	#N/A	#N/A	#N/A	#N/A	#N/A	#N/A
611328	NQO2	6	2987622	2990617	768.332	130	0	0	1	0	1	1	0	ENSG00000124588	22.6453	22.1863	22.1046	2.61368	115.453
611328	LINC01011	6	2987622	2990617	768.332	130	0	0	1	0	1	1	0	ENSG00000244041	0.264919	0.696628	2.18183	0.935592	0.516986
634813	PRSS35	6	84221546	84222871	767.912	131	0	0	1	1	1	0	0	ENSG00000146250	0.00031201	0.000920175	0.00168883	0.000258402	0.000118552
608025	FGF18	5	170845216	170847873	767.911	132	0	0	1	1	1	0	0	ENSG00000156427	0.0106373	3.63992e-05	6.60062e-06	0.0236226	3.76187e-06
103053	RHOG	11	3860032	3863125	767.632	133	0	1	1	1	1	1	1	ENSG00000177105	22.8657	34.3602	30.3847	12.5858	302.094
745878	MYC	8	128745991	128756979	766.076	134	0	0	1	0	1	1	1	ENSG00000136997	38.1091	4.07646	38.1687	45.73	0.0170153
745878	CASC11	8	128745991	128756979	766.076	134	0	0	1	0	1	1	1	ENSG00000249375	0.0203587	0.0251078	0.00577895	0.0792198	0.00167314
44700	TEDDM1	1	182366080	182374429	763.675	135	0	1	1	1	1	1	1	ENSG00000203730	2.40277e-05	6.14551e-07	4.09051e-06	2.07892e-07	0.000316583
627024	PRIM2	6	57178586	57180002	763.477	136	0	0	1	1	1	1	0	ENSG00000146143	10.549	4.17226	6.91763	5.32666	0.925982
158418	INHBE	12	57841970	57847045	758.811	137	0	0	1	1	1	0	1	ENSG00000139269	0.0272184	0.00889375	0.0380306	0.00212146	0.00453555
567220	FYB	5	39271312	39275451	758.076	138	0	0	0	0	1	1	0	ENSG00000082074	4.98348	49.372	80.9671	99.5566	652.791
608571	BOD1	5	173040111	173048561	752.84	139	0	1	1	1	1	1	1	ENSG00000145919	2.95072	8.49511	2.95335	13.831	1.67473
781545	CNTRL	9	123834159	123838205	747.538	140	0	1	1	1	1	1	1	ENSG00000119397	8.62499	7.52566	11.2468	38.9842	15.2632
416678	AC005220.3	20	52556648	52560771	744.879	141	0	0	1	1	1	0	1	#N/A	#N/A	#N/A	#N/A	#N/A	#N/A
5840	PIGV	1	27112453	27115733	744.325	142	0	1	1	1	1	1	1	ENSG00000060642	3.84569	3.67083	2.28411	2.16119	8.77135
119460	TIMM10	11	57295377	57298400	743.216	143	0	1	1	1	1	1	1	ENSG00000134809	15.7948	17.7967	12.9067	6.71599	2.88562
744956	MTSS1	8	125730521	125744854	741.946	144	0	0	1	0	1	0	0	ENSG00000170873	18.9949	3.06028	61.1682	3.29999	0.224487
156165	C12orf68	12	48575170	48579022	740.831	145	0	0	1	0	1	0	0	ENSG00000177875	1.48452e-07	4.3101e-06	1.8599e-07	0.0405356	0.00185684
400910	SNORA75	2	232318551	232321429	739.173	146	0	0	1	1	1	0	0	ENSG00000206885	26.6781	10.08	8.82507	10.367	86.9822
400910	SNORD20	2	232318551	232321429	739.173	146	0	0	1	1	1	0	0	ENSG00000207280	2.54319e-05	5.45304e-05	3.25042e-05	4.57481e-05	0.000147719
190940	DHRS12	13	52377096	52384957	737.028	147	0	0	1	1	1	1	0	ENSG00000102796	1.03523	3.59908	1.22069	6.53347	62.6409
190940	RP11-327P2.5	13	52377096	52384957	737.028	147	0	0	1	1	1	1	0	#N/A	#N/A	#N/A	#N/A	#N/A	#N/A
93636	CNNM2	10	104673556	104680672	736.725	148	0	0	1	1	1	0	0	ENSG00000148842	6.88227	1.09071	1.87769	2.3727	0.37258
93636	RP11-724N1.1	10	104673556	104680672	736.725	148	0	0	1	1	1	0	0	#N/A	#N/A	#N/A	#N/A	#N/A	#N/A
227304	NEK9	14	75592888	75594848	736.423	149	0	1	1	1	1	1	1	ENSG00000119638	13.274	9.59366	13.3505	15.9041	10.7364
227304	RP11-950C14.7	14	75592888	75594848	736.423	149	0	1	1	1	1	1	1	#N/A	#N/A	#N/A	#N/A	#N/A	#N/A
618802	HIST1H4K	6	27792447	27801291	733.335	150	0	1	1	1	1	1	1	ENSG00000197914	387.542	30.0496	129.159	21.1429	5.39779
119486	MIR130A	11	57408121	57411419	732.629	151	0	1	1	1	1	1	1	ENSG00000208009	2.48499e-05	4.07321e-05	3.23761e-05	3.42598e-05	0.000132495
768882	GNAQ	9	80637139	80648673	732.609	152	0	1	1	1	1	1	1	ENSG00000156052	16.6449	23.5134	55.5074	12.1009	145.333
69192	VIM	10	17274482	17278643	728.377	153	0	1	1	1	1	1	1	ENSG00000026025	62.6181	1697.56	29.0709	161.544	487.558
69192	RP11-124N14.3	10	17274482	17278643	728.377	153	0	1	1	1	1	1	1	#N/A	#N/A	#N/A	#N/A	#N/A	#N/A
528082	TET2	4	106064152	106068261	728.166	154	0	1	1	1	1	1	1	ENSG00000168769	9.33652	14.9047	26.6135	6.06575	245.536
492452	EPHB3	3	184275459	184280993	723.367	155	0	0	1	1	1	0	0	ENSG00000182580	0.116744	0.00726524	0.0005912	0.032531	0.0505719
571198	FST	5	52772248	52777464	722.178	156	0	0	1	0	1	0	0	ENSG00000134363	2.1616	0.0674454	0.0273531	0.0623769	0.0145822
337608	OSR1	2	19551658	19560016	720.702	157	0	0	1	1	1	1	0	ENSG00000143867	0.00143805	0.000691284	0.000652767	0.00071886	0.00352472
69190	VIM	10	17267901	17273494	720.328	158	0	1	1	1	1	1	1	ENSG00000026025	62.6181	1697.56	29.0709	161.544	487.558
69190	VIM-AS1	10	17267901	17273494	720.328	158	0	1	1	1	1	1	1	ENSG00000229124	0.407178	3.57014	2.15102	4.10232	24.9361
298632	MYL12B	18	3260099	3263541	716.86	159	0	1	1	1	1	1	1	ENSG00000118680	77.5353	176.974	129.774	101.26	310.234
298632	RP13-270P17.1	18	3260099	3263541	716.86	159	0	1	1	1	1	1	1	#N/A	#N/A	#N/A	#N/A	#N/A	#N/A
58614	RP5-1061H20.5	1	229363280	229363819	716.232	160	0	1	1	1	1	1	1	#N/A	#N/A	#N/A	#N/A	#N/A	#N/A
568582	HMGCS1	5	43310396	43314230	715.024	161	0	1	1	1	1	1	1	ENSG00000112972	83.4284	16.0972	124.791	5.96189	18.2199
483659	TIPARP	3	156385298	156394032	714.721	162	0	0	1	1	1	1	0	ENSG00000163659	17.5943	17.5321	55.7392	12.5413	28.7466
483659	TIPARP-AS1	3	156385298	156394032	714.721	162	0	0	1	1	1	1	0	ENSG00000243926	0.789599	1.07276	1.74294	2.12909	0.0524323
618801	HIST1H4J	6	27790966	27792446	714.123	163	0	1	1	1	1	1	1	ENSG00000197238	1519.63	149.216	716.802	65.8807	48.1972
140327	ADAMTS8	11	130296757	130307018	713.501	164	0	0	1	1	1	1	0	ENSG00000134917	2.70126e-05	0.00105064	2.23182e-05	2.74378e-05	0.000100201
762231	SLC25A51	9	37902767	37907347	712.637	165	0	0	1	1	1	0	0	ENSG00000122696	11.0381	12.1766	7.27429	11.9368	8.26082
647970	HDDC2	6	125619175	125633062	712.219	166	0	0	1	1	1	1	0	ENSG00000111906	7.87233	8.77692	2.89867	6.59848	0.451782
752193	PLGRKT	9	5426248	5442557	707.505	167	0	0	1	0	1	0	0	ENSG00000107020	8.28547	14.6897	14.8409	11.262	7.13616
363818	IL1B	2	113592713	113594483	707.358	168	0	0	0	1	1	0	0	ENSG00000125538	3.59766	18.5711	7.49503	0.0445391	262.948
95976	DUSP5	10	112255134	112262944	706.677	169	0	1	1	1	1	1	1	ENSG00000138166	4.53304	6.86613	19.3344	1.64865	1.23242
95976	RP11-525A16.4	10	112255134	112262944	706.677	169	0	1	1	1	1	1	1	#N/A	#N/A	#N/A	#N/A	#N/A	#N/A
477867	CEP70	3	138312712	138319219	704.411	170	0	1	1	1	1	1	1	ENSG00000114107	3.75404	7.70319	8.66158	14.4891	1.7834
490927	ZNF639	3	179037674	179041914	702.17	171	0	0	1	1	1	1	0	ENSG00000121864	15.7876	7.97461	15.1779	29.2418	2.56365
139778	ETS1	11	128449766	128458801	699.633	172	0	0	0	1	1	1	1	ENSG00000134954	0.499252	1.002	4.90491	325.477	5.20092
408599	RRBP1	20	17660712	17672229	699.478	173	0	1	1	1	1	1	1	ENSG00000125844	8.2505	26.2137	19.0977	5.04728	27.5456
210676	SNORD126	14	20793945	20795295	697.327	174	0	1	1	1	1	1	1	ENSG00000238344	4.03027e-05	4.82772e-05	5.75557e-05	4.9796e-05	0.000216023
648103	HEY2	6	126066736	126072244	694.461	175	0	0	1	0	1	1	0	ENSG00000135547	0.274847	9.21226e-05	0.00125438	0.0160538	0.00105911
648103	RP11-624M8.1	6	126066736	126072244	694.461	175	0	0	1	0	1	1	0	#N/A	#N/A	#N/A	#N/A	#N/A	#N/A
93841	SH3PXD2A	10	105614422	105616436	693.312	176	0	0	1	1	1	0	0	ENSG00000107957	1.41615	1.61851	7.99636	1.4731	0.195025
543683	MND1	4	154260455	154267166	693.191	177	0	0	1	1	1	1	0	ENSG00000121211	7.61789	0.312985	2.75088	0.115914	0.353134
71614	THNSL1	10	25303478	25306357	691.837	178	0	0	1	1	1	1	0	ENSG00000185875	0.51799	0.254972	1.5182	1.18651	0.000164992
71614	ENKUR	10	25303478	25306357	691.837	178	0	0	1	1	1	1	0	ENSG00000151023	0.0680375	0.00952766	0.733013	0.012981	0.0048686
226893	NUMB	14	73929982	73933047	690.188	179	0	0	0	0	1	0	1	ENSG00000133961	11.7482	157.105	14.6567	9.53664	655.679
344501	ZFP36L2	2	43450920	43455070	689.709	180	0	0	1	1	1	1	0	ENSG00000152518	23.9376	9.71476	1.78959	42.1581	65.9906
388741	SDPR	2	192705523	192718847	689.325	181	1	0	0	0	1	0	0	ENSG00000168497	12.9282	0.0755504	227.219	0.0400509	0.000449439
388741	AC098617.1	2	192705523	192718847	689.325	181	1	0	0	0	1	0	0	#N/A	#N/A	#N/A	#N/A	#N/A	#N/A
618816	HIST1H4L	6	27840382	27845139	688.149	182	0	1	1	1	1	1	1	ENSG00000198558	521.795	6.56317	146.719	9.44892	0.933625
258642	VIMP	15	101816805	101818647	685.186	183	0	0	1	1	1	0	0	ENSG00000131871	12.0025	21.7363	16.2095	5.9205	8.95437
626912	DST	6	56816016	56821197	684.362	184	0	0	1	0	1	0	0	ENSG00000151914	8.46596	10.9295	7.19016	2.26991	0.350133
626912	BEND6	6	56816016	56821197	684.362	184	0	0	1	0	1	0	0	ENSG00000151917	0.0996919	0.0204108	0.0974048	0.00678638	0.048643
284211	LYRM9	17	26219311	26221623	683.218	185	0	0	1	0	1	0	0	ENSG00000232859	1.00282	2.33576	2.38725	5.93252	3.13054
284211	RP1-66C13.4	17	26219311	26221623	683.218	185	0	0	1	0	1	0	0	ENSG00000266202	1.79536e-06	2.13316e-06	4.5605e-05	0.000987492	2.03087e-05
396582	IGFBP5	2	217552337	217560726	680.936	186	0	0	1	1	1	1	0	ENSG00000115461	0.746965	0.000516305	4.13945	0.00114607	0.0015682
396582	AC007563.5	2	217552337	217560726	680.936	186	0	0	1	1	1	1	0	#N/A	#N/A	#N/A	#N/A	#N/A	#N/A
393693	snoU13	2	208938686	208939088	677.722	187	0	1	1	0	1	0	0	#N/A	#N/A	#N/A	#N/A	#N/A	#N/A
483624	SSR3	3	156271748	156277429	676.181	188	0	0	1	1	1	1	0	ENSG00000114850	44.9461	83.6537	84.6129	19.0656	11.1541
346013	PPP1R21	2	48662849	48668705	673.673	189	0	1	1	1	1	1	1	ENSG00000162869	6.36512	6.6581	6.59108	9.9198	45.6875
346013	RP11-191L17.1	2	48662849	48668705	673.673	189	0	1	1	1	1	1	1	#N/A	#N/A	#N/A	#N/A	#N/A	#N/A
292530	TBX2	17	59469602	59481577	673.224	190	0	0	1	1	1	0	0	ENSG00000121068	0.00784655	0.0014582	0.00639928	0.00276625	0.0100213
292530	RP11-332H18.4	17	59469602	59481577	673.224	190	0	0	1	1	1	0	0	#N/A	#N/A	#N/A	#N/A	#N/A	#N/A
292530	RP11-332H18.5	17	59469602	59481577	673.224	190	0	0	1	1	1	0	0	#N/A	#N/A	#N/A	#N/A	#N/A	#N/A
383600	HOXD3	2	176999630	177004368	671.909	191	0	0	1	0	1	0	0	ENSG00000128652	0.00125135	0.00162057	0.00132728	0.00276936	0.00594444
383600	HOXD-AS2	2	176999630	177004368	671.909	191	0	0	1	0	1	0	0	ENSG00000237380	6.9369e-05	9.21672e-05	7.58047e-05	9.67131e-05	0.000343851
553298	WWC2-AS1	4	184158294	184169833	669.715	192	0	0	1	0	1	0	0	ENSG00000251128	0.000213291	1.47868e-06	4.08289e-05	1.56493e-06	6.38775e-06
737969	KB-1639H6.4	8	104131911	104133419	669.062	193	1	0	0	0	1	0	0	#N/A	#N/A	#N/A	#N/A	#N/A	#N/A
615820	NHLRC1	6	18122212	18128318	668.988	194	0	0	1	1	1	0	1	ENSG00000187566	0.749051	0.764894	0.766739	0.187492	5.37677e-05
218145	RP11-857B24.5	14	45375425	45383717	666.627	195	0	1	1	1	1	1	1	#N/A	#N/A	#N/A	#N/A	#N/A	#N/A
58621	TMEM78	1	229382957	229389680	665.067	196	0	0	1	1	1	1	0	ENSG00000177800	2.40544e-05	6.72534e-07	1.82977e-07	6.34109e-07	3.5709e-06
149444	SSPN	12	26273795	26276614	659.233	197	0	0	0	1	1	0	0	ENSG00000123096	0.0103047	0.275443	0.0404529	0.015857	1.56794
416606	ZNF217	20	52225205	52226927	658.479	198	0	1	1	1	1	1	1	ENSG00000171940	17.5282	12.6259	10.215	17.9169	106.212
429851	PEX26	22	18559635	18572892	658.192	199	0	0	1	0	1	0	0	ENSG00000215193	6.34434	8.57522	8.09066	7.78575	2.04663
429851	XXbac-B476C20.11	22	18559635	18572892	658.192	199	0	0	1	0	1	0	0	#N/A	#N/A	#N/A	#N/A	#N/A	#N/A
429851	XXbac-B476C20.9	22	18559635	18572892	658.192	199	0	0	1	0	1	0	0	#N/A	#N/A	#N/A	#N/A	#N/A	#N/A
223112	RP11-1042B17.5	14	61106403	61107550	657.818	200	0	0	1	1	1	0	0	#N/A	#N/A	#N/A	#N/A	#N/A	#N/A
559400	TRIO	5	14141000	14147844	654.595	201	0	0	1	1	1	0	0	ENSG00000038382	7.43192	26.9911	5.44147	0.880233	1.89024
341341	LTBP1	2	33170204	33173878	653.227	202	1	0	0	0	1	0	0	ENSG00000049323	25.0535	0.046903	327.018	0.0934989	0.232945
341341	Y_RNA	2	33170204	33173878	653.227	202	0	0	0	0	1	0	0	#N/A	#N/A	#N/A	#N/A	#N/A	#N/A
476393	BFSP2	3	133115749	133123901	652.872	203	0	0	1	0	1	0	0	ENSG00000170819	0.00576344	0.011503	0.00660499	0.0115706	0.0266281
289019	HOXB-AS4	17	46701021	46706541	650.053	204	0	0	1	1	1	0	0	ENSG00000242207	0.000315726	0.000395808	0.00036407	0.000422279	0.00147079
289019	HOXB9	17	46701021	46706541	650.053	204	0	0	1	1	1	0	0	ENSG00000170689	0.287044	4.89412e-05	0.000173009	5.45952e-05	0.000170189
596239	AC034228.3	5	131338044	131341756	649.882	205	0	0	1	1	1	1	0	#N/A	#N/A	#N/A	#N/A	#N/A	#N/A
528025	RNU6-351P	4	105894737	105896239	649.016	206	0	0	0	0	1	0	1	ENSG00000251906	1.7097e-05	2.42379e-05	1.91275e-05	2.4861e-05	8.28109e-05
528025	RP11-556I14.1	4	105894737	105896239	649.016	206	0	0	0	0	1	0	1	#N/A	#N/A	#N/A	#N/A	#N/A	#N/A
560325	BASP1	5	17215151	17220655	647.013	207	0	0	1	1	1	0	0	ENSG00000176788	2.3295	23.4036	3.74562	0.0414384	590.241
560325	AC091878.1	5	17215151	17220655	647.013	207	0	0	1	1	1	0	0	#N/A	#N/A	#N/A	#N/A	#N/A	#N/A
370100	MGAT5	2	134875525	134884121	645.155	208	0	0	0	1	1	1	1	ENSG00000152127	3.8973	20.7134	6.67465	12.8182	17.92
687928	GATAD1	7	92074886	92079481	644.398	209	0	0	1	0	1	0	0	ENSG00000157259	7.51728	11.927	10.3029	6.7679	3.23194
624525	RHAG	6	49603508	49606393	644.182	210	0	0	1	0	1	0	0	ENSG00000112077	212.753	9.93428e-05	125.381	0.000266225	0.000205726
276823	CMIP	16	81475083	81484443	643.481	211	0	0	1	1	1	0	1	ENSG00000153815	10.374	3.79662	68.0934	2.52139	67.7328
582310	LINC00461	5	87971924	87977835	643.131	212	0	1	1	1	1	1	1	ENSG00000245526	0.0218713	0.0301458	0.0425911	0.0319345	0.113619
582310	CTC-467M3.1	5	87971924	87977835	643.131	212	0	1	1	1	1	1	1	#N/A	#N/A	#N/A	#N/A	#N/A	#N/A
724621	CHD7	8	61589190	61598367	642.524	213	0	1	1	1	1	1	1	ENSG00000171316	7.8756	2.48199	7.30267	14.5773	34.2464
158337	ZBTB39	12	57399089	57400611	642.213	214	0	0	1	1	1	0	0	ENSG00000166860	2.79703	1.0749	3.41336	2.08397	0.01698
625422	EFHC1	6	52280078	52286637	642.175	215	0	1	1	1	1	1	1	ENSG00000096093	2.32909	1.25879	1.73164	1.69568	2.92454
631417	KCNQ5	6	73330748	73337110	641.706	216	0	0	1	1	1	0	0	ENSG00000185760	0.882099	0.177248	0.44648	1.52248	0.0915774
481487	PFN2	3	149684214	149694759	640.638	217	0	0	1	0	1	0	0	ENSG00000070087	0.0718348	0.0767311	0.0686931	3.65189	0.405433
481487	ANKUB1	3	149684214	149694759	640.638	217	0	0	1	0	1	0	0	ENSG00000206199	0.0131169	0.0301621	0.00952861	0.0127724	2.31518
481487	AC117395.1	3	149684214	149694759	640.638	217	0	0	1	0	1	0	0	#N/A	#N/A	#N/A	#N/A	#N/A	#N/A
481487	RP11-651P23.5	3	149684214	149694759	640.638	217	0	0	1	0	1	0	0	#N/A	#N/A	#N/A	#N/A	#N/A	#N/A
618791	HIST1H2AI	6	27770375	27776273	638.37	218	0	0	1	1	1	0	0	ENSG00000196747	1019.97	13.0085	461.354	6.52991	6.28729
618791	HIST1H2BL	6	27770375	27776273	638.37	218	0	0	1	1	1	0	0	ENSG00000185130	464.079	8.98337	220.908	5.39849	2.16566
618791	HIST1H4PS1	6	27770375	27776273	638.37	218	0	0	1	1	1	0	0	ENSG00000217862	0.000838043	0.000262843	3.51675e-06	3.35249e-06	1.21149e-05
22212	RPF1	1	84941119	84947206	635.695	219	0	0	1	1	1	0	1	ENSG00000117133	16.3909	19.5772	14.8392	27.5013	9.81865
618815	HIST1H3I	6	27837621	27840381	635.679	220	0	1	1	1	1	1	1	ENSG00000182572	350.999	8.24655	136.959	9.39805	1.42315
476528	C3orf36	3	133644417	133650381	635.535	221	0	0	1	0	1	0	0	ENSG00000221972	1.51367e-07	2.938e-07	2.82749e-07	1.22269e-06	1.10803e-06
688041	CDK6	7	92460612	92467461	634.969	222	0	0	1	1	1	1	0	ENSG00000105810	18.8257	2.99849	14.0284	19.8449	1.60897
688041	AC002454.1	7	92460612	92467461	634.969	222	0	0	1	1	1	1	0	#N/A	#N/A	#N/A	#N/A	#N/A	#N/A
103057	STIM1	11	3872404	3879208	634.906	223	0	1	1	1	1	1	1	ENSG00000167323	15.1645	13.3345	68.1338	25.2049	41.7723
103057	MIR4687	11	3872404	3879208	634.906	223	0	1	1	1	1	1	1	ENSG00000263421	4.26776e-05	4.95764e-05	4.5278e-05	4.52635e-05	0.000153936
103057	AC090587.4	11	3872404	3879208	634.906	223	0	1	1	1	1	1	1	#N/A	#N/A	#N/A	#N/A	#N/A	#N/A
103057	AC090587.5	11	3872404	3879208	634.906	223	0	1	1	1	1	1	1	#N/A	#N/A	#N/A	#N/A	#N/A	#N/A
493342	BCL6	3	187460429	187464148	633.857	224	0	0	1	1	1	1	0	ENSG00000113916	12.657	35.1029	0.234941	2.38921	724.626
493342	RP11-211G3.2	3	187460429	187464148	633.857	224	0	0	1	1	1	1	0	#N/A	#N/A	#N/A	#N/A	#N/A	#N/A
85578	RP11-77G23.2	10	76784440	76785161	631.2	225	0	0	1	1	1	1	0	#N/A	#N/A	#N/A	#N/A	#N/A	#N/A
35706	CGN	1	151496436	151509686	630.461	226	0	0	1	1	1	0	0	ENSG00000143375	0.0996161	0.0158489	0.0472862	0.10591	0.0444875
35706	SNORA44	1	151496436	151509686	630.461	226	0	0	1	1	1	0	0	#N/A	#N/A	#N/A	#N/A	#N/A	#N/A
611293	SERPINB1	6	2840902	2842325	628.599	227	0	0	1	0	1	1	0	ENSG00000021355	22.5512	63.6999	92.3529	23.324	334.985
30213	GPR61	1	110083451	110088718	628.02	228	0	0	1	1	1	1	0	ENSG00000156097	0.0388638	0.0156512	0.00914983	0.126057	0.0471481
30213	RP5-1160K1.8	1	110083451	110088718	628.02	228	0	0	1	1	1	1	0	#N/A	#N/A	#N/A	#N/A	#N/A	#N/A
382025	GAD1	2	171664227	171675881	627.343	229	0	0	0	1	1	1	0	ENSG00000128683	21.3938	0.0469143	6.64333	0.0247323	0.0941206
382025	AC007405.8	2	171664227	171675881	627.343	229	0	0	0	1	1	1	0	#N/A	#N/A	#N/A	#N/A	#N/A	#N/A
168895	DUSP6	12	89741722	89751488	627.116	230	0	0	1	1	1	0	1	ENSG00000139318	5.86357	35.5435	22.2766	0.277881	179.31
656109	AKAP12	6	151653550	151670491	625.68	231	0	0	1	0	1	0	0	ENSG00000131016	0.59541	0.0123439	0.425407	0.0605719	0.00313789
656109	snoU13	6	151653550	151670491	625.68	231	0	1	1	0	1	0	0	#N/A	#N/A	#N/A	#N/A	#N/A	#N/A
280488	SPDYE4	17	8660389	8662324	624.595	232	1	0	0	0	1	0	0	ENSG00000183318	0.00573208	0.00185323	0.1661	0.00233403	0.366909
293056	AC015923.1	17	61491614	61491812	624.153	233	0	0	1	1	1	0	0	#N/A	#N/A	#N/A	#N/A	#N/A	#N/A
183282	RNU6-70P	13	27917078	27933250	623.667	234	0	0	1	1	1	0	0	ENSG00000252247	2.38243e-05	3.6759e-05	3.28732e-05	4.0882e-05	0.0001231
112583	ABTB2	11	34376256	34385647	623.66	235	0	0	1	1	1	1	0	ENSG00000166016	0.129149	0.406199	0.0306676	0.0521018	1.66795
400912	NCL	2	232322127	232328427	623.623	236	0	0	1	0	1	0	0	ENSG00000115053	110.758	79.9074	107.21	129.439	23.4753
400912	SNORD82	2	232322127	232328427	623.623	236	0	0	1	0	1	0	0	ENSG00000202400	5.64099e-05	6.40164e-05	7.13295e-05	6.50678e-05	0.000192844
604556	C5orf54	5	159822091	159829658	623.583	237	0	0	1	1	1	0	1	ENSG00000221886	0.588566	0.493348	1.55602	0.0688528	0.0838581
258729	TM2D3	15	102181817	102190383	623.397	238	0	0	1	0	1	1	0	ENSG00000184277	11.9475	15.1741	6.19635	22.0343	72.8357
258729	RNU6-807P	15	102181817	102190383	623.397	238	0	0	1	0	1	1	0	ENSG00000252614	2.24301e-05	2.87289e-05	3.60964e-05	2.34012e-05	0.000106137
624913	TFAP2B	6	50785086	50786647	622.083	239	0	0	1	1	1	0	1	ENSG00000008196	0.000645851	0.000929948	0.000829697	0.00089867	0.00322003
385358	ITGA4	2	182319283	182329022	620.412	240	0	1	1	1	1	1	1	ENSG00000115232	77.4606	16.0505	9.68253	84.0206	27.5095
345976	FOXN2	2	48539228	48543709	619.142	241	0	1	1	1	1	1	1	ENSG00000170802	28.449	16.5412	47.3033	19.6592	52.8439
76935	NPY4R	10	47081572	47089303	616.78	242	0	0	1	1	1	0	0	ENSG00000204174	3.99448e-05	0.000157473	3.88795e-05	8.48235e-05	0.00016856
174215	POLR3B	12	106746252	106754477	614.549	243	1	0	0	0	1	0	0	ENSG00000013503	2.38471	2.2721	1.20612	2.69729	1.21706
683099	GSAP	7	77045115	77046867	612.145	244	0	0	0	1	1	0	1	ENSG00000186088	1.87633	13.1613	44.4345	13.6954	12.1769
683099	RP5-899E9.1	7	77045115	77046867	612.145	244	0	0	0	1	1	0	1	#N/A	#N/A	#N/A	#N/A	#N/A	#N/A
391663	CFLAR-AS1	2	202020801	202025048	610.642	245	0	0	1	0	1	0	1	ENSG00000226312	0.0386866	0.119012	0.0601314	0.0529119	0.944348
283346	AKAP10	17	19879250	19884449	609.608	246	0	0	0	1	1	0	0	ENSG00000108599	12.1244	16.5313	10.8146	21.9045	73.2902
615252	RNU6-1114P	6	16199919	16205578	609.33	247	0	1	1	1	1	1	1	ENSG00000251831	2.44659e-05	2.62283e-05	3.17733e-05	2.61237e-05	0.000106011
171861	APAF1	12	99035902	99040250	608.725	248	0	1	1	1	1	1	1	ENSG00000120868	7.53768	12.4044	8.14923	6.35755	117.111
171861	IKBIP	12	99035902	99040250	608.725	248	0	1	1	1	1	1	1	ENSG00000166130	5.31886	11.4323	5.72304	1.64552	67.8731
597963	KIF20A	5	137507839	137517488	608.395	249	0	0	1	0	1	0	1	ENSG00000112984	20.4817	0.27841	12.9758	0.0456747	0.087878
597963	BRD8	5	137507839	137517488	608.395	249	0	0	1	0	1	0	1	ENSG00000112983	24.7729	7.07065	12.5038	13.0163	56.1031
204753	ABCC4	13	95951787	95955271	606.789	250	0	0	1	0	1	0	0	ENSG00000125257	47.1467	2.50994	197.971	2.78959	0.0567983
432936	LL22NC01-116C6.1	22	33178967	33185615	606.081	251	0	0	1	1	1	0	0	#N/A	#N/A	#N/A	#N/A	#N/A	#N/A
52074	C4BPA	1	207275723	207277802	606.025	252	0	1	1	1	1	1	1	ENSG00000123838	0.00048035	0.00183318	0.000570919	0.000637934	2.92691
518002	EPGN	4	75173029	75175266	605.522	253	0	0	1	0	1	0	0	ENSG00000182585	0.0827637	0.0495555	0.55859	0.301926	0.110239
676321	ZPBP	7	50160150	50161011	604.862	254	0	0	1	0	1	1	0	ENSG00000042813	0.00901053	0.00648597	0.0104101	0.0125804	0.0218054
265440	GSG1L	16	28071437	28079494	604.828	255	0	0	1	1	1	0	0	ENSG00000169181	0.00516621	0.0227503	0.00253234	0.00265667	0.15174
210694	TEP1	14	20880222	20889907	604.794	256	0	0	1	0	1	1	0	ENSG00000129566	2.42513	12.8482	14.609	9.3769	32.4308
210694	RNA5SP382	14	20880222	20889907	604.794	256	0	0	1	0	1	1	0	ENSG00000200225	2.91675e-05	2.80165e-05	2.07761e-05	2.27438e-05	0.000101373
56956	FAM177B	1	222909496	222912566	604.559	257	0	0	1	0	1	0	0	ENSG00000197520	0.0457748	0.00971778	0.0252366	0.0412676	0.294674
701990	TBXAS1	7	139472294	139479347	602.473	258	0	0	0	1	1	0	0	ENSG00000059377	10.7088	59.6985	162.986	0.513637	433.675
701990	HIPK2	7	139472294	139479347	602.473	258	0	0	0	1	1	0	0	ENSG00000064393	2.37739	5.47226	28.3063	4.72906	10.7336
643364	GTF3C6	6	111278251	111286854	601.553	259	0	0	1	1	1	0	0	ENSG00000155115	20.9714	40.5533	25.9452	10.8947	1.84019
643364	snoU13	6	111278251	111286854	601.553	259	0	1	1	1	1	0	0	#N/A	#N/A	#N/A	#N/A	#N/A	#N/A
700585	AGBL3	7	134670203	134673323	600.499	260	0	0	1	0	1	1	1	ENSG00000146856	0.344549	0.219788	1.59042	1.36358	0.117045
470045	C3orf52	3	111829537	111836549	598.85	261	0	0	1	1	1	1	0	ENSG00000114529	0.266165	0.0144149	6.78472	0.317835	0.0288502
470045	MIR567	3	111829537	111836549	598.85	261	0	0	1	1	1	1	0	ENSG00000207940	3.37565e-05	3.50257e-05	2.72142e-05	3.51946e-05	0.000111822
210678	CCNB1IP1	14	20795320	20806783	597.112	262	0	1	1	1	1	1	1	ENSG00000100814	9.28081	5.74974	26.0186	11.6479	0.662568
14015	JUN	1	59245185	59253039	594.559	263	0	1	1	1	1	1	1	ENSG00000177606	18.0765	45.6989	3.52024	26.8872	9.08917
14015	LINC01135	1	59245185	59253039	594.559	263	0	1	1	1	1	1	1	ENSG00000234807	0.0128799	0.24441	0.000328246	0.121598	0.000208172
765998	FAM122A	9	71389003	71399003	593.71	264	0	0	1	0	1	1	1	ENSG00000187866	6.9319	3.3863	3.47646	3.68559	6.64345
455649	RP11-245J9.4	3	63996744	63998366	592.418	265	0	0	1	0	1	1	0	#N/A	#N/A	#N/A	#N/A	#N/A	#N/A
612730	BMP6	6	7726057	7729965	592.202	266	1	0	0	0	1	0	0	ENSG00000153162	0.624471	0.0392906	1.553	0.0104091	4.56747
382427		2	172956858	172963112	590.516	267	0	1	1	0	1	0	0	#N/A	#N/A	#N/A	#N/A	#N/A	#N/A
676377	IKZF1	7	50341186	50347256	589.474	268	0	1	1	1	1	1	1	ENSG00000185811	28.3743	20.3158	7.61835	113.136	127.514
477869	FAIM	3	138324398	138329194	588.304	269	0	0	1	1	1	1	0	ENSG00000158234	1.07936	16.3736	2.34913	1.34292	0.0811318
184670	FRY	13	32604928	32607989	586.376	270	1	0	0	0	1	0	0	ENSG00000073910	2.37163	2.91924	4.69415	1.87834	99.2433
184670	FRY-AS1	13	32604928	32607989	586.376	270	1	0	0	0	1	0	0	ENSG00000237637	0.0455233	0.03677	0.124083	0.0323146	1.36108
733942	DECR1	8	91010880	91017240	586.348	271	0	1	1	1	1	1	1	ENSG00000104325	42.6332	63.5052	40.5254	24.6722	98.8481
733942	NBN	8	91010880	91017240	586.348	271	0	1	1	1	1	1	1	ENSG00000104320	14.5809	36.3225	16.4449	13.484	139.144
747540	WISP1	8	134198047	134211320	585.773	272	0	1	1	1	1	1	1	ENSG00000104415	0.00324849	0.00436081	0.00380915	0.00448032	0.0165146
171839	SLC25A3	12	98986764	98989889	584.672	273	0	1	1	1	1	1	1	ENSG00000075415	169.68	179.868	154.114	117.177	104.014
103446	OR52A4	11	5142234	5145925	584.596	274	0	0	1	0	1	0	0	ENSG00000205494	0.00397794	0.00146959	0.00132234	0.00150757	0.00553259
618285	HIST1H2AB	6	26032305	26034591	583.721	275	0	1	1	1	1	1	1	ENSG00000137259	239.964	3.68182	79.9811	3.44912	1.99238
699303	MEST	7	130123397	130131393	583.543	276	1	0	0	0	1	0	0	ENSG00000106484	6.80746	0.332853	147.561	1.62082	0.146545
699303	RP11-2E11.10	7	130123397	130131393	583.543	276	1	0	0	0	1	0	0	#N/A	#N/A	#N/A	#N/A	#N/A	#N/A
699303	RP11-2E11.5	7	130123397	130131393	583.543	276	1	0	0	0	1	0	0	#N/A	#N/A	#N/A	#N/A	#N/A	#N/A
655641	PPIL4	6	149834768	149840193	582.116	277	0	1	1	1	1	1	1	ENSG00000131013	10.6007	10.5273	9.07161	15.177	16.9074
655641	RNU7-3P	6	149834768	149840193	582.116	277	0	1	1	1	1	1	1	ENSG00000252244	5.30675e-05	8.18525e-05	6.36009e-05	6.28921e-05	0.000321833
594658	MARCH3	5	126361828	126369387	582.096	278	0	0	1	1	1	0	1	ENSG00000173926	67.3504	1.58642	9.21869	3.21602	1.74728
364107	ACTR3	2	114645986	114651473	581.155	279	0	1	1	1	1	1	1	ENSG00000115091	96.1264	270.402	198.819	89.792	546.129
364107	RP11-141B14.1	2	114645986	114651473	581.155	279	0	1	1	1	1	1	1	#N/A	#N/A	#N/A	#N/A	#N/A	#N/A
157379	AAAS	12	53718188	53721565	580.891	280	0	0	1	1	1	0	0	ENSG00000094914	17.9155	11.6495	11.3725	11.2314	5.62743
357313	CAPG	2	85641313	85648227	579.971	281	0	0	1	1	1	0	1	ENSG00000042493	24.5201	627.699	4.64554	2.95979	20.0246
357313	SH2D6	2	85641313	85648227	579.971	281	0	0	1	1	1	0	1	ENSG00000152292	1.06716	0.0640063	0.0935204	0.0631795	0.2235
263896	PDZD9	16	22009190	22013811	578.668	282	0	0	1	0	1	1	0	ENSG00000155714	0.000847986	0.00123952	0.00090035	0.00145992	0.0054902
263896	CTD-2649C14.1	16	22009190	22013811	578.668	282	0	0	1	0	1	1	0	#N/A	#N/A	#N/A	#N/A	#N/A	#N/A
382429	DLX2	2	172966044	172973100	578.395	283	0	0	1	0	1	0	0	ENSG00000115844	0.0703441	0.000115572	0.018348	3.66519e-05	0.000309049
382429	AC104801.1	2	172966044	172973100	578.395	283	0	0	1	0	1	0	0	#N/A	#N/A	#N/A	#N/A	#N/A	#N/A
757377	MTAP	9	21801459	21803557	578.025	284	0	0	1	1	1	1	0	ENSG00000099810	10.6449	13.5243	9.58593	11.5374	0.207078
757377	RP11-145E5.5	9	21801459	21803557	578.025	284	0	0	1	1	1	1	0	ENSG00000264545	0.00729387	9.9734e-06	2.29226e-06	9.95613e-07	2.83127e-06
470002	ABHD10	3	111695488	111699177	576.807	285	0	0	1	1	1	1	0	ENSG00000144827	7.01643	20.7981	8.92078	10.4355	1.41123
575166	SGTB	5	65016932	65019085	576.187	286	0	0	0	0	1	0	1	ENSG00000197860	1.60759	17.0211	2.93946	23.4324	14.9358
575166	NLN	5	65016932	65019085	576.187	286	0	0	0	0	1	0	1	ENSG00000123213	2.99039	13.9897	2.69748	1.26535	0.18199
241416	SRP14	15	40329868	40338300	575.904	287	0	0	1	1	1	1	0	ENSG00000140319	71.7712	111.905	74.267	57.7473	100.924
241416	SRP14-AS1	15	40329868	40338300	575.904	287	0	0	1	1	1	1	0	ENSG00000248508	0.57871	1.30994	1.24274	2.48964	0.212801
585081	LIX1	5	96476902	96485568	575.447	288	0	1	1	1	1	1	1	ENSG00000145721	5.06004e-05	0.00069389	0.00160994	6.95885e-05	0.000441733
44747	RGS16	1	182567651	182590376	574.316	289	0	0	1	1	1	0	0	ENSG00000143333	2.79885	0.336564	3.80447	0.141713	0.0893676
44747	RP11-317P15.4	1	182567651	182590376	574.316	289	0	0	1	1	1	0	0	#N/A	#N/A	#N/A	#N/A	#N/A	#N/A
119415	SSRP1	11	57103304	57107461	574.29	290	0	1	1	1	1	1	1	ENSG00000149136	48.5828	15.3734	21.8642	17.5224	0.181965
119415	P2RX3	11	57103304	57107461	574.29	290	0	1	1	1	1	1	1	ENSG00000109991	0.00192037	0.000884515	0.000579267	0.000674956	0.00378156
761974	PAX5	9	37000340	37008401	572.923	291	0	0	1	0	1	1	0	ENSG00000196092	0.0202527	0.0383855	0.0423674	0.0292772	0.0936951
761974	RP11-297B17.3	9	37000340	37008401	572.923	291	0	0	1	0	1	1	0	#N/A	#N/A	#N/A	#N/A	#N/A	#N/A
426998	DSCR3	21	38635925	38642685	571.656	292	0	0	1	0	1	1	0	ENSG00000157538	16.8803	30.8894	30.1545	16.8655	35.7715
426998	AP001412.1	21	38635925	38642685	571.656	292	0	0	1	0	1	1	0	#N/A	#N/A	#N/A	#N/A	#N/A	#N/A
263658	TMEM159	16	21166049	21171878	569.232	293	0	0	1	1	1	0	0	ENSG00000011638	1.95651	9.08541	5.81889	4.62568	1.69036
263658	DNAH3	16	21166049	21171878	569.232	293	0	0	1	1	1	0	0	ENSG00000158486	0.00320003	0.00585339	0.00934853	0.00215137	0.00799382
631572	KCNQ5-AS1	6	73852950	73854769	569.164	294	0	0	1	1	1	1	0	ENSG00000229154	5.0629e-07	7.68558e-07	2.97375e-07	4.7764e-07	1.36169e-06
616879	SOX4	6	21593556	21594408	568.902	295	0	0	1	0	1	1	0	ENSG00000124766	1.38143	7.10274	2.39685	0.95482	0.0451962
699365	KLF14	7	130415578	130420020	567.877	296	0	0	1	0	1	0	0	ENSG00000174595	3.10319e-05	3.63486e-05	1.20087e-05	3.61666e-07	9.66422e-06
34292	PEX11B	1	145513771	145516282	567.522	297	0	0	1	1	1	1	0	ENSG00000131779	4.46844	7.18396	6.29211	6.45084	4.58342
34292	GNRHR2	1	145513771	145516282	567.522	297	0	0	1	1	1	1	0	ENSG00000211451	1.9101	1.84621	2.59499	3.79011	8.54137
584993	ERAP2	5	96210582	96211797	566.741	298	0	0	0	0	1	1	0	ENSG00000164308	3.3004	15.5016	2.69705	33.8991	5.47124
52057	YOD1	1	207226202	207226352	566.7	299	0	1	1	1	1	1	1	ENSG00000180667	38.215	4.0025	24.3564	5.61075	15.5242
170279	SOCS2	12	93963636	93966327	565.957	300	0	0	1	0	1	0	0	ENSG00000120833	24.1806	0.19258	11.0723	8.86047	0.0465417
170279	SOCS2-AS1	12	93963636	93966327	565.957	300	0	0	1	0	1	0	0	ENSG00000246985	1.22884	0.0110022	1.1061	1.24106	0.0155442
10285	TESK2	1	45955111	45957467	563.068	301	0	0	1	1	1	1	0	ENSG00000070759	4.44929	2.86016	4.47621	1.99397	19.0618
645102	TRAPPC3L	6	116859344	116868350	562.645	302	0	1	1	1	1	1	1	ENSG00000173626	0.016123	0.00170918	0.220214	0.00368211	0.00240977
683175	RSBN1L	7	77325125	77327287	562.564	303	0	1	1	1	1	1	1	ENSG00000187257	9.4338	6.31656	8.94827	14.3986	64.102
683175	RSBN1L-AS1	7	77325125	77327287	562.564	303	0	1	1	1	1	1	1	ENSG00000214293	2.33013	1.40654	2.78007	1.9609	10.4474
158334	GPR182	12	57387551	57392948	560.788	304	0	0	1	1	1	0	0	ENSG00000166856	5.45583e-05	4.78199e-07	3.31267e-07	1.02971e-06	1.02621e-06
158334	HBCBP	12	57387551	57392948	560.788	304	0	0	1	1	1	0	0	#N/A	#N/A	#N/A	#N/A	#N/A	#N/A
158334	RP11-474N8.5	12	57387551	57392948	560.788	304	0	0	1	1	1	0	0	#N/A	#N/A	#N/A	#N/A	#N/A	#N/A
145736	RNU6-491P	12	14391283	14404581	560.43	305	0	0	0	0	1	1	1	ENSG00000251908	1.68349e-05	2.57555e-05	2.63741e-05	1.90993e-05	7.62513e-05
331315	BRSK1	19	55794659	55803086	559.619	306	0	0	1	1	1	1	0	ENSG00000160469	0.100877	0.0213147	1.23429	0.344862	0.0324055
135654	AP000908.1	11	113954239	113969656	558.613	307	0	0	1	0	1	0	0	#N/A	#N/A	#N/A	#N/A	#N/A	#N/A
493316	SST	3	187386645	187390966	558.507	308	0	0	1	1	1	0	0	ENSG00000157005	9.6089e-07	8.31862e-07	8.25393e-07	3.48382e-06	4.11289e-06
330590	SIGLEC14	19	52143468	52152262	557.989	309	0	0	1	0	1	0	0	ENSG00000254415	2.16602	4.59822	0.576266	0.00010555	12.3378
330590	SIGLEC5	19	52143468	52152262	557.989	309	0	0	1	0	1	0	0	ENSG00000105501	0.562565	0.85227	0.107827	0.000418536	59.3357
330590	RPL7P51	19	52143468	52152262	557.989	309	0	0	1	0	1	0	0	ENSG00000243469	1.05686e-06	0.000458966	2.40187e-05	2.76491e-06	0.00665387
30764	C1orf162	1	112014292	112018606	557.148	310	0	1	1	1	1	1	1	ENSG00000143110	2.68697	62.0576	0.709392	20.9775	15.6982
301058	PIEZO2	18	11147177	11150608	555.975	311	1	0	0	0	1	0	0	ENSG00000154864	0.117063	0.0208232	0.882476	0.0216419	0.0586268
125718	RAB30	11	82773109	82783635	553.252	312	0	0	1	0	1	1	1	ENSG00000137502	1.0844	0.521074	10.3112	8.90521	0.20726
125718	RAB30-AS1	11	82773109	82783635	553.252	312	0	0	1	0	1	1	1	ENSG00000246067	5.75609	9.46531	7.88459	8.83498	2.54873
576255	CCNB1	5	68471391	68473549	551.655	313	0	0	1	1	1	0	1	ENSG00000134057	83.912	4.09672	54.8099	0.665035	0.449294
576255	snoU13	5	68471391	68473549	551.655	313	0	1	1	1	1	0	1	#N/A	#N/A	#N/A	#N/A	#N/A	#N/A
22233	CTBS	1	85038838	85042009	551.379	314	0	0	1	1	1	0	1	ENSG00000117151	2.98878	14.1815	6.24689	6.94493	143.724
695427	CTTNBP2	7	117511042	117514738	551.146	315	1	0	0	0	1	0	0	ENSG00000077063	4.45294	0.0803139	34.7957	0.022509	0.0762345
156485	SPATS2	12	49756726	49760546	549.691	316	0	0	1	0	1	0	0	ENSG00000123352	4.40938	3.34171	8.7824	1.61127	0.592865
289011	HOXB3	17	46681704	46682818	549.463	317	0	0	1	0	1	0	0	ENSG00000120093	1.27295	0.0261368	1.34026	0.644999	0.0600476
289011	HOXB6	17	46681704	46682818	549.463	317	0	0	1	0	1	0	0	ENSG00000108511	0.0117089	0.00721542	0.085025	0.00362119	0.00627366
253516	FAM103A1	15	83654378	83656144	548.917	318	0	0	1	0	1	0	0	ENSG00000169612	11.5625	12.6174	12.3806	7.75787	21.2702
253516	HOMER2	15	83654378	83656144	548.917	318	0	0	1	0	1	0	0	ENSG00000103942	5.56095	2.69587	7.22622	0.903642	0.47855
517581	RNU6ATAC5P	4	73890735	73894224	546.259	319	0	0	1	0	1	0	0	ENSG00000210839	1.44704e-05	2.03424e-05	1.98665e-05	1.83008e-05	7.27363e-05
363798	CKAP2L	2	113521473	113525715	546.105	320	0	0	1	0	1	0	0	ENSG00000169607	18.0584	0.356212	15.4814	0.0273785	0.106576
371444	SPOPL	2	139256825	139262039	545.941	321	0	0	1	1	1	0	1	ENSG00000144228	5.80938	13.7594	5.73968	4.28922	183.81
371444	AC097721.2	2	139256825	139262039	545.941	321	0	0	1	1	1	0	1	#N/A	#N/A	#N/A	#N/A	#N/A	#N/A
278765	C17orf97	17	256417	262443	544.843	322	0	1	1	1	1	1	1	ENSG00000187624	0.0677635	0.25543	0.0841324	0.0565811	0.354245
278765	AC108004.3	17	256417	262443	544.843	322	0	1	1	1	1	1	1	#N/A	#N/A	#N/A	#N/A	#N/A	#N/A
164467	PHLDA1	12	76424220	76432518	544.814	323	0	0	1	1	1	1	0	ENSG00000139289	0.543428	5.37009	0.358351	0.133621	0.271686
164467	RP11-290L1.2	12	76424220	76432518	544.814	323	0	0	1	1	1	1	0	#N/A	#N/A	#N/A	#N/A	#N/A	#N/A
164467	RP11-290L1.3	12	76424220	76432518	544.814	323	0	0	1	1	1	1	0	#N/A	#N/A	#N/A	#N/A	#N/A	#N/A
699484	MKLN1	7	130793408	130796988	543.924	324	0	1	1	1	1	1	1	ENSG00000128585	22.1673	14.8915	19.9607	32.5078	112.729
699484	LINC-PINT	7	130793408	130796988	543.924	324	0	1	1	1	1	1	1	ENSG00000231721	8.82911	6.13635	5.69408	47.8327	201.71
289004	HOXB3	17	46653916	46660463	541.885	325	0	0	1	0	1	1	0	ENSG00000120093	1.27295	0.0261368	1.34026	0.644999	0.0600476
289004	HOXB4	17	46653916	46660463	541.885	325	0	0	1	0	1	1	0	ENSG00000182742	1.2283	0.00881047	1.15937	0.135224	2.19235e-06
289004	MIR10A	17	46653916	46660463	541.885	325	0	0	1	0	1	1	0	ENSG00000257178	0.0235542	3.32008e-07	0.0355169	0.000586746	9.3082e-07
120843	TMEM179B	11	62552270	62559742	541.806	326	0	1	1	1	1	1	1	ENSG00000185475	12.8474	27.065	12.3714	10.2754	23.9122
120843	TMEM223	11	62552270	62559742	541.806	326	0	1	1	1	1	1	1	ENSG00000168569	3.58206	4.00344	4.3195	3.09216	0.165967
120843	RP11-727F15.12	11	62552270	62559742	541.806	326	0	1	1	1	1	1	1	#N/A	#N/A	#N/A	#N/A	#N/A	#N/A
490869	PIK3CA	3	178863488	178867393	540.253	327	0	0	1	0	1	1	0	ENSG00000121879	17.8998	12.3988	8.76278	19.3512	40.494
490869	RP11-360P21.2	3	178863488	178867393	540.253	327	0	0	1	0	1	1	0	#N/A	#N/A	#N/A	#N/A	#N/A	#N/A
116600	PTPRJ	11	48001307	48004168	540.228	328	0	1	1	1	1	1	1	ENSG00000149177	9.08318	24.299	35.5314	12.6174	242.14
6638	MATN1-AS1	1	31188386	31193343	540.22	329	0	0	1	0	1	1	0	ENSG00000186056	1.00197	0.323608	0.168036	3.06749	0.437859
6638	MATN1	1	31188386	31193343	540.22	329	0	0	1	0	1	1	0	ENSG00000162510	0.144566	0.00371094	0.00315293	0.202208	0.166579
501057	NCAPG	4	17810109	17813638	539.865	330	0	1	1	1	1	1	1	ENSG00000109805	32.4271	0.742378	17.6894	0.106618	0.238326
501057	DCAF16	4	17810109	17813638	539.865	330	0	1	1	1	1	1	1	ENSG00000163257	14.1503	4.89103	13.528	22.3102	8.93579
571520	SNX18	5	53812428	53818070	538.555	331	0	1	1	1	1	1	1	ENSG00000178996	1.91308	13.6299	1.15728	4.24537	144.298
158115	RP11-603J24.6	12	56513471	56516470	537.064	332	0	0	1	0	1	1	0	#N/A	#N/A	#N/A	#N/A	#N/A	#N/A
477158	MSL2	3	135913712	135916257	536.594	333	0	1	1	1	1	1	1	ENSG00000174579	12.1975	5.99945	11.1504	27.8167	56.1853
317542	RTTN	18	67871441	67876672	536.023	334	0	0	1	1	1	1	0	ENSG00000176225	7.24451	1.2896	4.12436	9.10447	0.350994
49626	C1orf53	1	197874612	197883295	535.75	335	0	0	1	1	1	0	0	ENSG00000203724	0.320547	0.683557	0.112621	0.00875707	0.00544618
49626	LHX9	1	197874612	197883295	535.75	335	0	0	1	1	1	0	0	ENSG00000143355	0.0112071	0.00427828	0.00579106	0.00461547	0.0167247
35415	PLEKHO1	1	150113719	150130464	533.049	336	0	0	1	1	1	1	0	ENSG00000023902	4.07829	80.1975	24.56	12.9147	114.534
492451	EIF2B5-AS1	3	184268513	184275458	532.302	337	0	0	1	1	1	0	0	ENSG00000230215	8.85197e-07	3.23008e-05	3.54918e-05	3.8435e-06	0.00242128
433739	MB	22	36033286	36036752	531.212	338	0	0	1	1	1	0	0	ENSG00000198125	0.0145617	0.0225994	0.015666	0.0195879	0.0720285
397048	PNKD	2	219134749	219135860	530.691	339	0	0	1	0	1	1	1	ENSG00000127838	13.404	24.3612	28.8161	8.57631	5.31949
397048	AAMP	2	219134749	219135860	530.691	339	0	0	1	0	1	1	1	ENSG00000127837	19.4789	31.1558	19.2115	15.7276	9.35279
92803	RP11-441O15.3	10	101190466	101195700	530.509	340	0	0	1	0	1	1	0	#N/A	#N/A	#N/A	#N/A	#N/A	#N/A
287677	PTRF	17	40573100	40575763	530.244	341	0	0	1	0	1	0	0	ENSG00000177469	3.9206	0.227718	25.0855	0.0830846	0.0211281
54315	CENPF	1	214775801	214777074	529.536	342	0	0	1	1	1	0	0	ENSG00000117724	44.8671	0.590378	35.3877	0.901824	0.0877136
529881	RP11-380D23.1	4	111435499	111440690	527.584	343	0	0	1	1	1	1	0	#N/A	#N/A	#N/A	#N/A	#N/A	#N/A
618602	HIST1H4I	6	27106418	27107452	527.411	344	0	0	1	1	1	1	0	ENSG00000198339	76.7592	3.77976	21.857	0.641986	0.560487
42095	CENPL	1	173793708	173796178	525.47	345	0	0	1	0	1	1	0	ENSG00000120334	11.8353	2.43221	7.54383	2.25222	0.780202
42095	DARS2	1	173793708	173796178	525.47	345	0	0	1	0	1	1	0	ENSG00000117593	7.90467	7.18127	6.91775	1.91477	1.09562
100122	FAM53B	10	126429450	126437199	525.078	346	0	0	1	0	1	1	1	ENSG00000189319	20.356	9.08539	7.00005	8.35531	49.1693
696387	CPED1	7	120624850	120629938	524.223	347	0	0	1	1	1	1	0	ENSG00000106034	12.1515	2.91503	1.84843	0.0511007	0.0549188
262385	MYH11	16	15948167	15953184	523.481	348	0	0	1	0	1	0	0	ENSG00000133392	0.0491425	0.0373631	0.0576436	0.0193279	0.2816
723098	LYN	8	56780974	56794019	521.56	349	0	0	1	1	1	0	1	ENSG00000254087	15.2101	47.4414	42.0733	0.267543	811.54
738050	CTHRC1	8	104380396	104385385	521.365	350	1	0	0	0	1	0	0	ENSG00000164932	0.0315876	0.00700577	0.118712	0.013968	0.00935009
676308	C7orf72	7	50133355	50136498	520.704	351	0	0	0	1	1	1	0	ENSG00000164500	1.26376e-07	2.5656e-07	0.000161864	2.48529e-07	9.41479e-07
85577	RP11-77G23.5	10	76781131	76784439	520.645	352	0	0	1	1	1	1	0	#N/A	#N/A	#N/A	#N/A	#N/A	#N/A
68552	HSPA14	10	14878376	14887218	520.144	353	0	0	0	1	1	1	1	ENSG00000187522	21.2741	14.6317	21.821	13.4349	20.695
68552	CDNF	10	14878376	14887218	520.144	353	0	0	0	1	1	1	1	ENSG00000185267	0.295332	0.248289	0.480951	1.59407	0.0978027
383778	LINC01116	2	177501443	177506085	519.475	354	0	0	1	0	1	0	0	ENSG00000163364	0.100313	0.288534	0.0492296	0.0673822	2.91464
383778	LINC01117	2	177501443	177506085	519.475	354	0	0	1	0	1	0	0	ENSG00000224577	8.69406e-07	7.30796e-07	6.67869e-07	8.41519e-07	3.18673e-06
86344	KCNMA1	10	79394612	79399403	518.95	355	0	0	1	1	1	0	1	ENSG00000156113	0.102515	0.488596	0.0545152	0.0321735	0.521708
618600	HIST1H2BJ	6	27099102	27106153	517.888	356	0	0	1	1	1	1	0	ENSG00000124635	461.522	11.3946	161.199	13.1824	9.77241
618600	HIST1H2AG	6	27099102	27106153	517.888	356	0	0	1	1	1	1	0	ENSG00000196787	176.062	2.49544	54.4827	9.61067	1.59081
616519	E2F3	6	20400928	20403179	517.451	357	0	0	1	0	1	1	1	ENSG00000112242	9.20902	4.46144	13.5825	1.8479	25.146
365957	PTPN4	2	120513542	120518269	516.761	358	0	0	1	0	1	1	1	ENSG00000088179	10.8929	6.9327	4.91558	34.5288	7.26999
585677	CHD1	5	98258843	98266385	514.375	359	0	1	1	1	1	1	1	ENSG00000153922	30.4201	20.4624	20.6748	55.5774	131.845
585677	CTD-2007H13.3	5	98258843	98266385	514.375	359	0	1	1	1	1	1	1	#N/A	#N/A	#N/A	#N/A	#N/A	#N/A
14164	FGGY	1	59758286	59764653	513.917	360	0	1	1	1	1	1	1	ENSG00000172456	1.83305	5.19975	1.8878	5.59762	21.0274
517876	PPBP	4	74852105	74855338	513.42	361	1	0	0	0	1	0	0	ENSG00000163736	88.8713	0.03568	2630.24	0.0743547	0.0101286
51332	GOLT1A	1	204176179	204183485	511.697	362	1	0	0	0	1	0	0	ENSG00000174567	0.000170969	0.00333406	0.000704201	0.107819	0.000644968
22279	SSX2IP	1	85154753	85156616	510.406	363	0	0	1	0	1	1	0	ENSG00000117155	28.2623	2.29127	38.1486	2.58102	0.97537
582308	LINC00461	5	87960424	87964907	509.848	364	0	1	1	0	1	1	1	ENSG00000245526	0.0218713	0.0301458	0.0425911	0.0319345	0.113619
219784	C14orf183	14	50554130	50562914	509.717	365	0	0	1	1	1	1	0	ENSG00000168260	0.000180632	0.0156863	0.0773372	0.0929649	2.50547
219784	RP11-58E21.5	14	50554130	50562914	509.717	365	0	0	1	1	1	1	0	#N/A	#N/A	#N/A	#N/A	#N/A	#N/A
219784	RP11-58E21.7	14	50554130	50562914	509.717	365	0	0	1	1	1	1	0	#N/A	#N/A	#N/A	#N/A	#N/A	#N/A
262005	MIR193B	16	14397535	14400648	509.599	366	0	0	1	1	1	1	0	ENSG00000207639	4.48563e-05	4.95269e-05	4.61457e-05	4.23049e-05	0.000174056
144348	CD69	12	9911472	9914117	509.057	367	0	0	0	0	1	1	0	ENSG00000110848	25.7594	0.0431674	186.008	188.746	0.86774
618823	HIST1H2BO	6	27861035	27864923	507.497	368	0	0	1	1	1	1	0	ENSG00000196331	489.355	6.83276	204.135	7.07627	7.03871
139773	RP11-1007G5.2	11	128395636	128401060	506.956	369	0	0	0	1	1	1	1	#N/A	#N/A	#N/A	#N/A	#N/A	#N/A
336695	AC104623.2	2	16702524	16708458	506.071	370	0	0	1	0	1	0	0	#N/A	#N/A	#N/A	#N/A	#N/A	#N/A
377375	NR4A2	2	157197937	157201343	505.896	371	0	1	1	1	1	1	1	ENSG00000153234	5.9599	0.41308	4.66944	5.58768	7.64385
126766	EED	11	85952696	85957638	505.451	372	0	1	1	1	1	1	1	ENSG00000074266	11.6657	10.3124	6.67187	12.472	7.97762
36886	RRNAD1	1	156696068	156699449	503.582	373	0	0	1	0	1	1	0	ENSG00000143303	7.7871	6.05207	10.6415	4.30749	8.71797
36886	ISG20L2	1	156696068	156699449	503.582	373	0	0	1	0	1	1	0	ENSG00000143319	7.17759	6.81863	6.26952	6.10628	32.6327
666461	AHR	7	17333329	17339625	503.328	374	0	0	0	1	1	1	0	ENSG00000106546	8.35252	45.0101	28.5747	13.0567	1.14055
666461	AC003075.4	7	17333329	17339625	503.328	374	0	0	0	1	1	1	0	#N/A	#N/A	#N/A	#N/A	#N/A	#N/A
206993	BIVM	13	103459517	103460305	501.967	375	0	0	1	0	1	0	0	ENSG00000134897	10.3551	3.13339	18.0752	2.22349	0.0673923
206993	BIVM-ERCC5	13	103459517	103460305	501.967	375	0	0	1	0	1	0	0	ENSG00000270181	#N/A	#N/A	#N/A	#N/A	#N/A
89754	CH25H	10	90963423	90967167	501.19	376	0	0	0	1	1	0	0	ENSG00000138135	0.129833	0.0680855	0.0269251	0.00480349	4.68347e-06
186924	PROSER1	13	39608238	39618828	500.253	377	0	0	1	0	1	1	0	ENSG00000120685	9.05402	3.78121	9.53367	4.33308	3.08464
186924	NHLRC3	13	39608238	39618828	500.253	377	0	0	1	0	1	1	0	ENSG00000188811	4.72602	21.393	8.10799	9.7117	1.59577
383592	HOXD12	2	176961158	176967522	500.185	378	0	0	1	1	1	0	0	ENSG00000170178	5.55814e-05	7.04346e-05	6.43614e-05	6.9013e-05	0.000276398
182900	SHISA2	13	26619140	26634986	499.952	379	0	0	0	0	1	1	0	ENSG00000180730	1.6133e-05	0.00469464	3.85014e-06	0.2053	5.89705e-07
182900	LINC00415	13	26619140	26634986	499.952	379	0	0	0	0	1	1	0	ENSG00000231983	1.05149e-06	1.63178e-06	1.17312e-06	1.63057e-06	4.9003e-06
626988	BAG2	6	57034829	57041039	498.89	380	0	0	1	0	1	1	0	ENSG00000112208	8.38516	1.2642	5.11544	4.92665	0.128848
626988	RP11-203B9.4	6	57034829	57041039	498.89	380	0	0	1	0	1	1	0	#N/A	#N/A	#N/A	#N/A	#N/A	#N/A
93869	SLK	10	105723734	105729377	497.118	381	0	0	1	0	1	1	0	ENSG00000065613	16.4652	14.3244	13.9913	13.9033	70.53
298619	MYOM1	18	3210222	3220746	495.254	382	1	0	0	0	1	0	0	ENSG00000101605	0.514842	0.314569	21.4834	1.57059	1.57625
4216	NBL1	1	19965667	19968102	495.178	383	0	0	0	0	1	1	0	ENSG00000158747	0.362766	0.343082	0.563915	1.65331	0.112246
450613	TMEM158	3	45263958	45268875	494.417	384	0	0	0	1	1	0	0	ENSG00000249992	0.336897	0.220353	0.489373	1.39546e-06	0.0291934
450613	AC010170.1	3	45263958	45268875	494.417	384	0	0	0	1	1	0	0	#N/A	#N/A	#N/A	#N/A	#N/A	#N/A
664967	ARL4A	7	12724826	12728593	494.288	385	0	0	1	1	1	0	0	ENSG00000122644	110.677	8.2863	3.41086	6.51248	1.53169
664967	CTD-2320J21.1	7	12724826	12728593	494.288	385	0	0	1	1	1	0	0	#N/A	#N/A	#N/A	#N/A	#N/A	#N/A
385446	RNU6ATAC19P	2	182600183	182603469	493.909	386	0	0	1	1	1	0	0	ENSG00000221023	1.61006e-05	2.47934e-05	3.00515e-05	3.35702e-05	0.000115586
345866	FBXO11	2	48130849	48134742	492.941	387	0	1	1	1	1	1	1	ENSG00000138081	19.3103	14.6032	23.2503	24.2542	82.4275
345866	AC079807.2	2	48130849	48134742	492.941	387	0	1	1	1	1	1	1	#N/A	#N/A	#N/A	#N/A	#N/A	#N/A
67846	RP11-186N15.3	10	12288804	12297437	492.686	388	0	0	1	1	1	1	0	#N/A	#N/A	#N/A	#N/A	#N/A	#N/A
371273	HNMT	2	138721229	138721933	492.581	389	0	0	1	1	1	0	0	ENSG00000150540	1.99757	44.7043	0.120357	0.0191245	0.0883127
394140	MAP2	2	210285850	210289936	492.08	390	0	0	1	0	1	0	0	ENSG00000078018	0.18865	0.0583233	1.40845	0.127681	0.0844008
248882	RAB11A	15	66161679	66162506	491.668	391	1	0	0	0	1	0	0	ENSG00000103769	44.9879	89.5167	141.943	28.7932	125.493
480398	RNU6-428P	3	146288053	146292128	490.463	392	0	1	1	1	1	1	1	ENSG00000199812	2.37838e-05	3.01052e-05	2.78986e-05	2.82616e-05	9.78322e-05
2518	AADACL4	1	12700924	12716452	490.409	393	0	0	1	1	1	1	0	ENSG00000204518	3.18512e-07	2.80905e-07	3.94845e-07	3.67421e-07	1.15569e-06
651101	RP11-349J5.2	6	135261568	135264260	488.549	394	0	1	1	1	1	1	1	#N/A	#N/A	#N/A	#N/A	#N/A	#N/A
52071	C4BPB	1	207260202	207272701	488.431	395	0	1	1	1	1	1	1	ENSG00000123843	0.0123163	0.0109353	0.0131145	0.721384	0.0533096
529672	GAR1	4	110736003	110739019	487.49	396	0	0	1	1	1	1	0	ENSG00000109534	7.71567	2.29501	3.76945	2.57948	0.875908
529672	RP11-602N24.3	4	110736003	110739019	487.49	396	0	0	1	1	1	1	0	#N/A	#N/A	#N/A	#N/A	#N/A	#N/A
370652	CXCR4	2	136869013	136876153	487.089	397	0	0	0	1	1	1	1	ENSG00000121966	5.40543	15.0957	37.7852	403.355	599.408
644226	RP11-544L8__B.4	6	114222879	114226021	485.672	398	0	0	1	1	1	0	1	#N/A	#N/A	#N/A	#N/A	#N/A	#N/A
357572	CHMP3	2	86738402	86749580	485.521	399	0	1	1	1	1	1	1	ENSG00000115561	19.4808	35.0394	22.2491	31.184	141.732
357572	RNU6-640P	2	86738402	86749580	485.521	399	0	1	1	1	1	1	1	ENSG00000200563	2.16121e-05	2.909e-05	2.22069e-05	2.37641e-05	0.000390944
36348	GATAD2B	1	153893802	153902760	483.378	400	0	0	1	1	1	0	0	ENSG00000143614	5.16231	2.54425	4.3394	4.5348	23.2026
330557	CEACAM18	19	51977821	51987569	482.461	401	0	0	1	1	1	0	0	ENSG00000213822	4.75114e-05	0.000110346	7.49572e-05	9.41008e-05	0.000287461
614398	TBC1D7	6	13325435	13329633	482.405	402	1	0	0	0	1	0	0	ENSG00000145979	11.9253	7.39523	10.3177	2.9388	16.3479
493062	ADIPOQ	3	186559823	186565414	482.009	403	0	0	1	0	1	1	0	ENSG00000181092	0.000791397	0.000147609	8.82447e-05	0.000250919	0.00338296
566361	CTD-2353F22.1	5	36724674	36730057	481.437	404	0	0	1	1	1	0	1	#N/A	#N/A	#N/A	#N/A	#N/A	#N/A
662837	ACTB	7	5601713	5619438	481.242	405	0	0	1	0	1	0	0	ENSG00000075624	754.99	2118.12	2748.17	462.405	3852.97
124255	GAB2	11	78126420	78132016	481.136	406	0	1	1	1	1	1	1	ENSG00000033327	2.62643	9.54332	1.21257	0.356508	166.802
737341	YWHAZ	8	101965454	101968973	480.406	407	0	0	1	1	1	0	0	ENSG00000164924	102.514	262.51	260.617	141.05	450.896
737103	SPAG1	8	101168232	101175233	479.896	408	0	0	1	0	1	1	0	ENSG00000104450	0.386661	1.17348	0.313701	0.207656	7.21635
737103	Y_RNA	8	101168232	101175233	479.896	408	0	0	1	0	1	1	0	#N/A	#N/A	#N/A	#N/A	#N/A	#N/A
519441	snoU13	4	79555295	79565033	479.341	409	0	1	1	1	1	0	1	#N/A	#N/A	#N/A	#N/A	#N/A	#N/A
610927	FOXC1	6	1607572	1615871	478.384	410	0	0	1	1	1	1	0	ENSG00000054598	3.20284e-05	0.00266166	0.0723596	3.10821e-05	0.088421
618341	HIST1H4H	6	26285060	26288843	477.646	411	0	0	1	1	1	1	0	ENSG00000158406	458.007	66.1849	204.024	42.1531	24.7077
393432	KLF7	2	208024036	208032045	477.614	412	0	0	0	1	1	0	0	ENSG00000118263	3.5816	5.60656	6.8276	14.7027	106.84
718364	RP11-90P5.7	8	38020002	38026897	477.283	413	0	0	1	0	1	0	0	#N/A	#N/A	#N/A	#N/A	#N/A	#N/A
106954	C11orf58	11	16628042	16635632	477.106	414	0	0	1	0	1	0	0	ENSG00000110696	68.1314	76.1867	76.0697	89.5599	40.3527
106954	SOX6	11	16628042	16635632	477.106	414	0	0	1	0	1	0	0	ENSG00000110693	25.3588	0.0528116	0.079642	0.0659997	0.637497
495585	LSG1	3	194392913	194394494	476.056	415	0	0	1	0	1	0	0	ENSG00000041802	11.0813	12.5754	11.7207	21.7999	4.73607
36360	RPS27	1	153956792	153974010	475.981	416	0	1	1	1	1	1	1	ENSG00000177954	1591.65	1274.39	1398.45	8962.47	186.74
36360	RAB13	1	153956792	153974010	475.981	416	0	1	1	1	1	1	1	ENSG00000143545	9.6263	16.7854	17.9777	0.0532622	0.439458
36360	RP11-422P24.9	1	153956792	153974010	475.981	416	0	1	1	1	1	1	1	#N/A	#N/A	#N/A	#N/A	#N/A	#N/A
36360	U3	1	153956792	153974010	475.981	416	0	1	1	1	1	1	1	#N/A	#N/A	#N/A	#N/A	#N/A	#N/A
668944	OSBPL3	7	25019105	25021358	475.876	417	0	0	1	1	1	0	0	ENSG00000070882	11.1056	4.86092	13.7579	5.59049	0.129094
174933	CORO1C	12	109122677	109126504	475.714	418	0	0	1	0	1	0	0	ENSG00000110880	88.3626	118.361	190.267	1.14951	97.4543
266035	FUS	16	31191436	31198086	475.435	419	0	0	1	1	1	0	1	ENSG00000089280	37.82	14.0452	35.7552	47.6548	106.276
266035	RP11-388M20.6	16	31191436	31198086	475.435	419	0	0	1	1	1	0	1	#N/A	#N/A	#N/A	#N/A	#N/A	#N/A
107092	RPS13	11	17091057	17100015	475.044	420	1	0	0	0	1	0	0	ENSG00000110700	453.037	370.423	318.044	1157.24	38.576
107092	SNORD14B	11	17091057	17100015	475.044	420	1	0	0	0	1	0	0	ENSG00000201403	0.000242416	0.000736248	0.000333453	0.000260396	0.000176358
107092	AC116533.1	11	17091057	17100015	475.044	420	1	0	0	0	1	0	0	#N/A	#N/A	#N/A	#N/A	#N/A	#N/A
107092	SNORD14A	11	17091057	17100015	475.044	420	1	0	0	0	1	0	0	ENSG00000272034	#N/A	#N/A	#N/A	#N/A	#N/A
626940	KIAA1586	6	56910973	56917896	473.975	421	0	0	1	0	1	0	0	ENSG00000168116	16.6165	2.61266	12.5924	6.84014	0.422224
186217	RFXAP	13	37389617	37398257	473.343	422	0	0	1	0	1	1	0	ENSG00000133111	3.89228	0.602416	1.22827	1.42627	0.337975
32424	RP11-27K13.3	1	117600462	117602628	473.197	423	0	0	1	1	1	1	0	#N/A	#N/A	#N/A	#N/A	#N/A	#N/A
229048	SNORA79	14	81667655	81671398	472.803	424	0	1	1	1	1	1	1	ENSG00000221303	10.0507	4.12896	6.79033	1.43835	3.80186
253171	MEX3B	15	82335167	82338934	472.801	425	1	0	0	0	1	0	0	ENSG00000183496	1.64065	0.750419	3.20226	0.0320627	0.000174738
253171	AC026956.1	15	82335167	82338934	472.801	425	1	0	0	0	1	0	0	#N/A	#N/A	#N/A	#N/A	#N/A	#N/A
458242	AC112219.1	3	72310003	72312584	471.914	426	0	0	1	1	1	0	0	#N/A	#N/A	#N/A	#N/A	#N/A	#N/A
242710	GATM	15	45693059	45696304	471.039	427	0	0	1	1	1	1	0	ENSG00000171766	1.70893	3.56788	4.88795	0.183666	0.112411
[truncated: 1,232 more rows]

## Sheet: nCD4_SIPs
baitID	baitName	baitChr	baitStart	baitEnd	intscore	rank	specific	shared	SIP.Ery	SIP.MacMon	SIP.MK	SIP.nCD4	SIP.Neu	ENSEMBL_GENEID	Ery	MacMon	MK	nCD4	Neu
[truncated: 1,466 more rows]

[truncated: 1 more sheets: Neu_SIPs]
