# Supplementary material for: Super interactive promoters provide insight into cell type-specific regulatory networks in blood lineage cell types
Source: PLOS journal article supplement (doi:10.1371/journal.pgen.1009984), 2022-01-31
Supplement: S15 (10.1371/journal.pgen.1009984.s015) [file journal.pgen.1009984.s015]

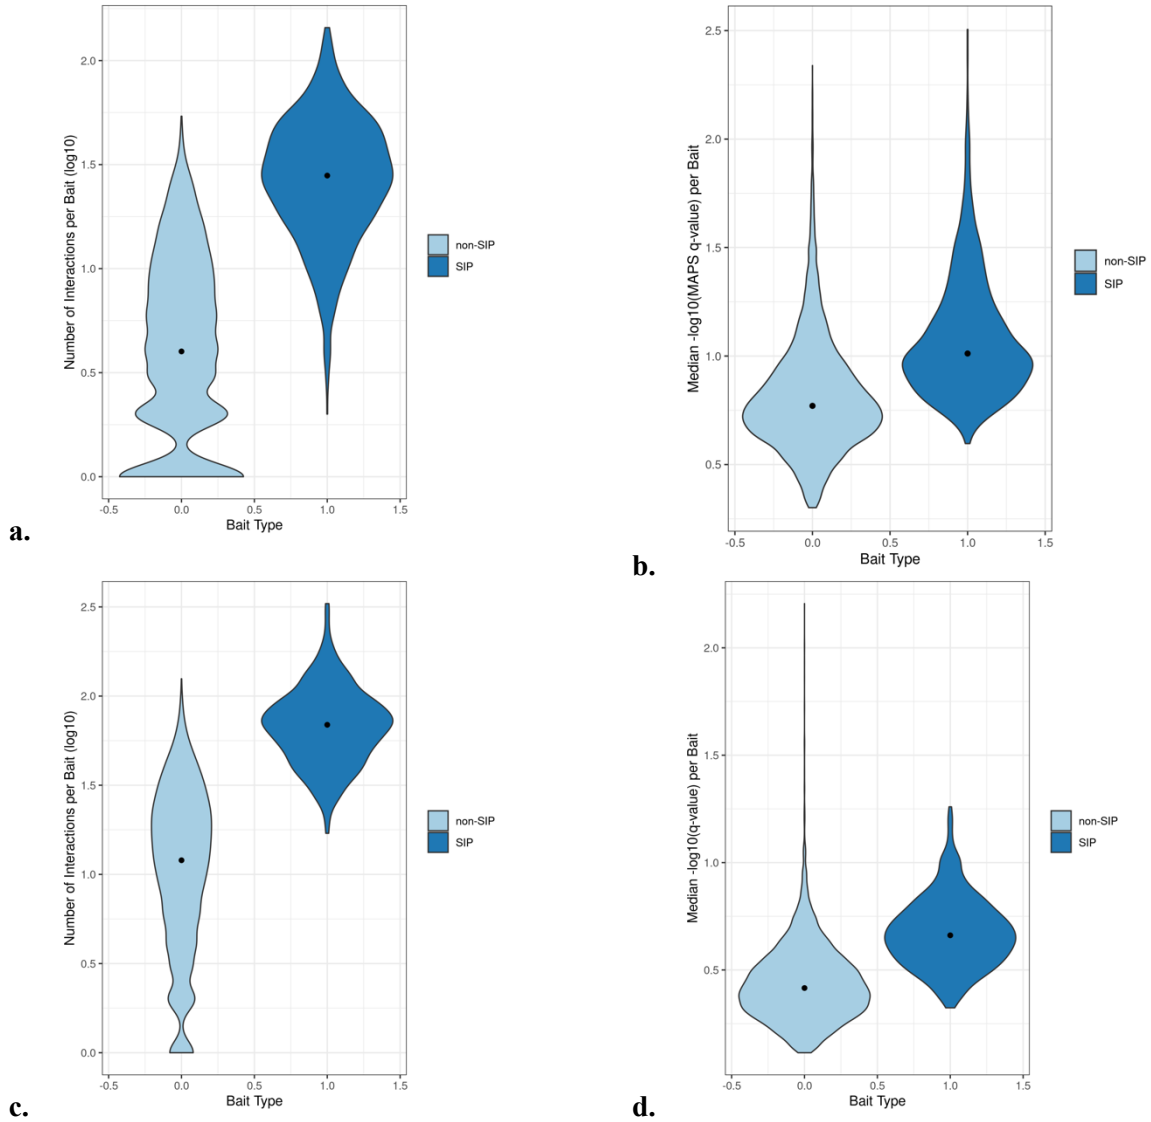

**S13 Fig. (A)** GM12878 SIPs are driven by a large number of interactions. Distribution of the number of significant interactions (log10 scale) between promoter bait and promoter interacting regions (PIRs) for SIPs and non-SIPs in GM12878 HiChIP. **(B)** The Distribution of the median SIP score (-log10 MAPS q-value) of significant interactions per promoter bait for SIPs and non-SIPs in GM12878 HiChIP. **(C)** Distribution of the number of significant interactions (log10 scale) between promoter bait and promoter interacting regions (PIRs) for SIPs and non-SIPs in GM12878 Hi-C. **(D)** The Distribution of the median SIP score (-log10 q-value) of significant interactions per promoter bait for SIPs and non-SIPs in GM12878 Hi-C. The median of each distribution is marked by a black dot.
