# Supplementary material for: Super interactive promoters provide insight into cell type-specific regulatory networks in blood lineage cell types
Source: PLOS journal article supplement (doi:10.1371/journal.pgen.1009984), 2022-01-31
Supplement: S29 (10.1371/journal.pgen.1009984.s029) [file journal.pgen.1009984.s029]

**S2 Table. SIPs interact with more super promoter-interacting regulatory regions (super PIRs) than non-SIPs.** Details corresponding to **Fig. 2**. For each cell type, the number of promoter baits interacting with a super PIR or typical PIR are reported, along with the corresponding ratio and Chi-square p-value. Median PIR scores for each cell type and promoter bait type are also reported, along with the corresponding Wilcoxon p-value for the difference in distribution between SIPs and non-SIPs. (Ery = erythrocytes; MacMon= macrophages/monocytes; MK = megakaryocytes; nCD4 = naive CD4 T-cells; Neu = neutrophils)

| Bait Type     | # Super PIR | # Typical PIR | Ratio | Chi-sq p-value | Median PIR Score | Wilcoxon p-value |
|---------------|-------------|---------------|-------|----------------|------------------|------------------|
| <b>Ery</b>    |             |               |       |                |                  |                  |
| SIP           | 969         | 188           | 0.84  | 2.7e-91        | 6                | 1.6e-119         |
| non-SIP       | 6,924       | 6,188         | 0.53  |                | 4                |                  |
| <b>MacMon</b> |             |               |       |                |                  |                  |
| SIP           | 603         | 205           | 0.75  | 3.2e-35        | 5                | 1.7e-50          |
| non-SIP       | 6,550       | 6,011         | 0.52  |                | 4                |                  |
| <b>MK</b>     |             |               |       |                |                  |                  |
| SIP           | 955         | 332           | 0.74  | 2.7e-52        | 5                | 2.9e-68          |
| non-SIP       | 6,796       | 6,273         | 0.52  |                | 4                |                  |
| <b>nCD4</b>   |             |               |       |                |                  |                  |
| SIP           | 889         | 104           | 0.90  | 7.7e-50        | 7                | 3.2e-69          |
| non-SIP       | 8,311       | 4,146         | 0.67  |                | 5                |                  |
| <b>Neu</b>    |             |               |       |                |                  |                  |
| SIP           | 716         | 145           | 0.83  | 8.6e-83        | 6                | 2.9e-104         |
| non-SIP       | 5,399       | 5,618         | 0.49  |                | 3                |                  |
